# Supplementary material for: The DREAM complex represses growth in response to DNA damage in Arabidopsis
Source: Life Sci Alliance. 2021 Sep 28;4(12):e202101141. doi: 10.26508/lsa.202101141 (PMC8500230; doi:10.26508/lsa.202101141)
Supplement: Supplementary file 1 [file LSA-2021-01141_TableS1.xlsx]

## Sheet: Sheet1
Supplementary Table 1: Overview of TAP results from cisplatin-treated cell cultures (for details see Supplementary Table 2)
AGI	alias	TAG-RBR1	TAG-LIN54A	LIN54A-TAG	TAG-LIN52A	LIN52A-TAG	TAG-NAC044	NAC044-TAG	Gene Model Description TAIR
AT4G32730	MYB3R1		2	2	2				Encodes a putative c-myb-like transcription factor with three MYB repeats.
AT5G00540	MYB3R2								novel transcribed region;(source:Araport11)
AT3G09370	MYB3R3		2	2					C-myb-like transcription factor (MYB3R3) mRNA. It is a target of CDK phosphorylation and blocks cell division in response to DNA damage.
AT5G11510	MYB3R4								Arabidopsis thaliana putative c-myb-like transcription factor MYB3R-4. Functions in powdery mildew induced host endoreduplication at the site of infection.
AT5G02320	MYB3R5								Encodes a putative c-MYB-like transcription factor of the MYB3R factor gene family (MYB3R5).
AT2G36010	E2FA	2							Member of the E2F transcription factors, (cell cycle genes), key components of the cyclin D/retinoblastoma/E2F pathway.
AT5G22220	E2FB	2	2	2	1				Member of the E2F transcription factors, (cell cycle genes), key components of the cyclin D/retinoblastoma/E2F pathway. Binds DPA and RBR1 proteins. Expressed throughout the cell cycle. Abundance increased by auxin through stabilization of the protein. El
AT1G47870	E2FC	2	2	2	1				Member of the E2F transcription factors, (cell cycle genes), key components of the cyclin D/retinoblastoma/E2F pathway. AtE2Fc is regulated by a balance between gene expression and ubiquitin-proteasome proteolysis. AtE2Fc might play a role in cell divis
AT5G14960	E2FD/DEL2								DP-E2F-like 2;(source:Araport11)
AT3G48160	E2FE/DEL1		2	1					E2F-like protein, an inhibitor of the endocycle, preserves the mitotic state of proliferating cells by suppressing transcription of genes that are required for cells to enter the DNA endoreduplication cycle.
AT3G01330	E2FF/DEL3								Member of the E2F transcription factors, (cell cycle genes), key components of the cyclin D/retinoblastoma/E2F pathway.
AT5G02470	DPA	2	1						core cell cycle genes
AT5G03415	DPB	2	2	2					Encodes a homolog of the animal DP protein. DP, in animals, forms a heterodimer with E2F and plays a central role in G1/S transition in the cell division cycle. DPB has been shown to interact with non phosphorylated E2Fc; when E2Fc is phosphorylated, the
AT3G12280	RBR1	2	2	2	2				Encodes a retinoblastoma homologue RETINOBLASTOMA-RELATED protein (RBR or RBR1). RBR controls nuclear proliferation in the female gametophyte. Also required for correct differentiation of male gametophytic cell types. Regulates stem cell maintenance in
AT5G27610	ALY1	1	2	2					protein ALWAYS EARLY 1;(source:Araport11)
AT3G05380	ALY2	2	2	2					ALWAYS EARLY 2;(source:Araport11)
AT3G21430	ALY3	2	2	2	2	2			DNA binding protein;(source:Araport11)
AT3G22780	TSO1								CHC protein involved in cell cycle progression (positive regulator).
AT4G14770	TCX2/SOL2								Regulates fate transition and cell Divisions in the stomatal lineage.
AT3G22760	TCX3/SOL1								CXC domain containing TSO1-like protein 1. The gene is expressed in stamens, pollen mother cells, and immature ovules. Regulates fate transition and cell Divisions in the stomatal lineage.
AT3G04850	TCX4								Tesmin/TSO1-like CXC domain-containing protein;(source:Araport11)
AT4G29000	TCX5/LIN54A	2	2	2	2	1			Tesmin/TSO1-like CXC domain-containing protein;(source:Araport11)
AT2G20110	TCX6/LIN54B				2				Tesmin/TSO1-like CXC domain-containing protein;(source:Araport11)
AT5G25790	TCX7								Tesmin/TSO1-like CXC domain-containing protein;(source:Araport11)
AT3G16160	TCX8								Tesmin/TSO1-like CXC domain-containing protein;(source:Araport11)
AT1G04930	LIN37A		2	2	2				hydroxyproline-rich glycoprotein family protein;(source:Araport11)
AT2G32840	LIN37B		2	2	2				proline-rich family protein;(source:Araport11)
AT2G45250	LIN52A/DRC1	2	2	2	2	2			integral membrane hemolysin-III-like protein;(source:Araport11)
AT4G38280	LIN52B		2						integral membrane hemolysin-III-like protein;(source:Araport11)
AT5G58230	MSI1	2	2	2	2	2			Encodes a WD-40 repeat containing protein that functions in chromatin assembly as part of the CAF1 and FIE complex. Mutants exhibit parthenogenetic development that includes proliferation of unfertilized endosperm and embryos. In heterozygous plants 50% o
AT2G16780	MSI2								Encodes a WD-40 repeat protein similar to yeast MSI1.
AT4G35050	MSI3								Encodes a WD-40 repeat protein similar to yeast MSI1. The predicted protein has a DWD motif. It can bind to DDB1a in Y2H assays, and DDB1b in co-IP assays, and may be involved in the formation of a CUL4-based E3 ubiquitin ligase
AT2G19520	MSI4								Controls flowering.
AT4G29730	MSI5								cell cycle-related repressor genes encoding WD-repeat proteins.
AT3G01600	NAC DOMAIN CONTAINING PROTEIN 44 (NAC044);	2					2	2	NAC domain containing protein 44;(source:Araport11)
AT3G48750	CDKA;1	2							A-type cyclin-dependent kinase. Together with its specific inhibitor, the Kip-related protein, KRP2 they regulate the mitosis-to-endocycle transition during leaf development. Dominant negative mutations abolish cell division. Loss of function phenotype
AT3G54650	F BOX-LIKE17 (FBL17)	2							RNI-like superfamily protein;(source:Araport11)
AT1G14320	RIBOSOMAL PROTEIN L10 A (RPL10A)	2							Encodes a ribosomal protein L10 and may be involved in translation regulation. Semi-dominant mutations in SAC552 can suppress defects in acaulis5, which encodes a thermospermine synthase, by enhancing translation of acl5 and itself.
AT1G74860			2						hypothetical protein;(source:Araport11)
AT1G78540	SH2 DOMAIN PROTEIN B (SHB)		2	2					Encodes a protein that contains an SH2 domain. It can pull down a 120-kD tyrosine-phosphorylated protein in vitro. It is predicted to act as a transcription factor.
AT2G17280			2						Phosphoglycerate mutase family protein;(source:Araport11)
AT2G40630	DRC2		2	2	2	2			Uncharacterized conserved protein (UCP030365);(source:Araport11)
AT2G40930	UBIQUITIN-SPECIFIC PROTEASE 5 (UBP5)		2						Encodes ubiquitin-specific protease with nuclear localization signals that is likely to be involved in ubiquitin-mediated protein degradation.
AT3G21140			2					1	Pyridoxamine 5-phosphate oxidase family protein;(source:Araport11)
AT3G55560	AT-HOOK MOTIF NUCLEAR-LOCALIZED PROTEIN 15 (AHL15)		2						AT-hook protein of GA feedback 2;(source:Araport11)
AT3G55730	MYB DOMAIN PROTEIN 109 (AtMYB109)		2						putative transcription factor MYB109 (MYB109) mRNA,
AT5G05240			2						cation-transporting ATPase;(source:Araport11)
AT5G10110			2	1					DNA-directed RNA polymerase subunit beta;(source:Araport11)
AT5G49700	AT-HOOK MOTIF NUCLEAR LOCALIZED PROTEIN 17 (AHL17)		2						Putative AT-hook DNA-binding family protein;(source:Araport11)
AT3G07800	THYMIDINE KINASE 1A (TK1A)			2	2	2			Encodes a thymidine kinase that salvages DNA precursors.
AT1G48630	RECEPTOR FOR ACTIVATED C KINASE 1B (RACK1B)				2				Encodes a protein with similarity to mammalian RACKs. RACKs function to shuttle activated protein kinase C to different subcellular sites and may also function as a scaffold through physical interactions with other proteins. RACK1B has no phenotype on its
AT1G53850	20S PROTEASOME ALPHA SUBUNIT E1 (PAE1)				2				Encodes alpha5 subunit of 20s proteosome involved in protein degradation and RNA degradation.
AT1G64740	ALPHA-1 TUBULIN (TUA1)				2				alpha-tubulin expressed primarily in stamens and mature pollen
AT1G79990					2				coatomer subunit beta-2;(source:Araport11)
AT3G10670	NON-INTRINSIC ABC PROTEIN 7 (ATNAP7)				2				Plastidic SufC-like ATP-binding cassette/ATPase essential for Arabidopsis embryogenesis. Involved in the biogenesis and/or repair of oxidatively damaged Fe?S clusters. Expressed in embryos and meristems.
AT3G15980					2				Coatomer, beta subunit;(source:Araport11)
AT3G51160	MURUS 1 (MUR1);SENSITIVE TO FREEZING8 (SFR8)				1	2			Catalyzes the first step in the de novo synthesis of GDP-L-fucose. Loss of function mutations result in reduced levels of fucosylation and decreased freezing tolerance.
AT3G52750	FTSZ2-2				2	2			Nuclear gene that encodes a plastidial division protein (FtsZ2-2). FtsZ2-2 is involved in chloroplast morphology and internal organisation in addition to participating in chloroplast partition
AT3G55620	EUKARYOTIC INITIATION FACOR 6A (eIF6A)				2				Translation initiation factor IF6;(source:Araport11)
AT4G04770	ARABIDOPSIS THALIANA NUCLEOSOME ASSEMBLY PROTEIN 1 (ATNAP1)				2				Encodes an iron-stimulated ATPase. A member of the NAP subfamily of ABC transporters. Involved in Fe-S cluster assembly. Similar to SufB. Involved in the regulation of iron homeostasis. Able to form homodimers. Interacts with AtNAP7 inside the chloroplast
AT5G02890					2	1			Encodes a protein with similarity to transferases in plants and fungi.
AT5G13650	SUPPRESSOR OF VARIEGATION 3 (SVR3)				2				Encodes SVR3, a putative chloroplast TypA translation elongation GTPase. Loss of SVR3 suppresses variegation mediated by var2. SVR3 is essential for plants? ability to develop functional chloroplasts under chilling stress (8C), but not at normal tempera
AT5G49840					2	1			ATP-dependent Clp protease;(source:Araport11)
AT5G50340	RADA-LIKE (ATRADA)				2				DNA repair protein RadA-like protein;(source:Araport11)
AT5G50850	MACCI-BOU (MAB1)				2				Transketolase family protein;(source:Araport11)
AT5G60540	PYRIDOXINE BIOSYNTHESIS 2 (PDX2)				2				Encodes a protein predicted to function in tandem with PDX1 to form glutamine amidotransferase complex with involved in vitamin B6 biosynthesis. PDX2 is predicted to function as glutaminase within the complex.
AT1G79050	HOMOLOG OF BACTERIAL RECA (RECA1)					2			recA DNA recombination family protein;(source:Araport11)
AT2G22360	DNA J PROTEIN A6 (DJA6)					2		2	DNAJ heat shock family protein;(source:Araport11)
AT4G27070	TRYPTOPHAN SYNTHASE BETA-SUBUNIT 2 (TSB2)					2			Tryptophan synthase beta. Expressed at low levels in all tissues. The mRNA is cell-to-cell mobile.
AT4G25200	MITOCHONDRION-LOCALIZED SMALL HEAT SHOCK PROTEIN 23.6						2	2	AtHSP23.6-mito mRNA, nuclear gene encoding mitochondrial
AT1G25580	SUPPRESSOR OF GAMMA RADIATION 1 (SOG1)							2	Encodes suppressor of gamma response 1 (SOG1), a putative transcription factor governing multiple responses to DNA damage.
AT2G01970								2	Endomembrane protein 70 protein family;(source:Araport11)
AT2G29500	HSP17.6B							2	HSP20-like chaperones superfamily protein;(source:Araport11)
AT3G46230	ARABIDOPSIS THALIANA HEAT SHOCK PROTEIN 17.4 (ATHSP17.4)							2	Member of the class I small heat-shock protein (sHSP) family, which accounts for the majority of sHSPs in maturing seeds.Induced by heat, cold, salt, drought and high-light.
AT4G39960	DNA J PROTEIN A5 (DJA5)							2	Molecular chaperone Hsp40/DnaJ family protein;(source:Araport11)
Numbers in columns C-I indicate if the interactor was identified above threshold in one (1) or two (2) out of two TAP replicates; only interactors that were found in 2 replicates of at least one experiment are considered reliable positives and are listed here
Orange BG	DREAM component homologs in Arabidopsis thaliana
Grey	potential DREAM components which have not been found in our TAP screens after cisplatin treatment; these components have only been listed as background info
Blue	NAC transcription factors involved in DNA damage control
