# Supplementary material for: The DREAM complex represses growth in response to DNA damage in Arabidopsis
Source: Life Sci Alliance. 2021 Sep 28;4(12):e202101141. doi: 10.26508/lsa.202101141 (PMC8500230; doi:10.26508/lsa.202101141)
Supplement: Supplementary file 2 [file LSA-2021-01141_TableS2.xlsx]

## Sheet: Suppl MS data
Supplemental Dataset: Protein Identification details obtained with the Orbitrap Elite (Thermo Fisher Scientific) or Q Exactive (Thermo Fisher Scientific) and Mascot Distiller software (version 2.5.0, Matrix Science) combined with the Mascot search engine (version 2.5.1, Matrix Science) using the Mascot Daemon interface and database TAIRplus (Van Leene et al., 2015). Proteins and peptides headers …
Experiment number	Bait	Tag	Orbitrap	ID number	Background	prot_acc	prot_desc	prot_score	prot_mass	prot_matches_sig	prot_sequences_sig	prot_cover	prot_len	pep_query	pep_rank	pep_isbold	pep_isunique	pep_exp_mz	pep_exp_mr	pep_exp_z	pep_calc_mr	pep_delta	pep_start	pep_end	pep_miss	pep_score	pep_ident	pep_expect	pep_res_before	pep_seq	pep_res_after	pep_var_mod	pep_var_mod_pos
1	RBR1	NGSrhino	Q Exactive	1	no	AT3G12280	Symbols: RBR1, RBR, RB, ATRBR1, RB1 | retinoblastoma-related 1 | chr3:3913671-3918433 REVERSE LENGTH=1013	26294	112105	525	58	61.3	1013	133	1	1	1	409.713	817.411	2	817.412	-0.0003	745	751	0	56.89	37	0.00011	R	INGMVER	L
1	RBR1	NGSrhino	Q Exactive	1	no	AT3G12280	Symbols: RBR1, RBR, RB, ATRBR1, RB1 | retinoblastoma-related 1 | chr3:3913671-3918433 REVERSE LENGTH=1013	26294	112105	525	58	61.3	1013	160	1	1	1	412.237	822.46	2	822.46	0.0001	774	780	0	61.49	33	1.5e-05	R	TSLLFSR	H
1	RBR1	NGSrhino	Q Exactive	1	no	AT3G12280	Symbols: RBR1, RBR, RB, ATRBR1, RB1 | retinoblastoma-related 1 | chr3:3913671-3918433 REVERSE LENGTH=1013	26294	112105	525	58	61.3	1013	204	1	1	1	414.764	827.514	2	827.512	0.002	691	698	0	54.07	31	5.1e-05	R	LLALGNVK	S	Deamidated (NQ)	0.00000200.0
1	RBR1	NGSrhino	Q Exactive	1	no	AT3G12280	Symbols: RBR1, RBR, RB, ATRBR1, RB1 | retinoblastoma-related 1 | chr3:3913671-3918433 REVERSE LENGTH=1013	26294	112105	525	58	61.3	1013	360	1	1	1	425.218	848.422	2	848.424	-0.0018	394	402	0	62.55	37	3e-05	K	TNGISGATK	L	Deamidated (NQ)	0.020000000.0
1	RBR1	NGSrhino	Q Exactive	1	no	AT3G12280	Symbols: RBR1, RBR, RB, ATRBR1, RB1 | retinoblastoma-related 1 | chr3:3913671-3918433 REVERSE LENGTH=1013	26294	112105	525	58	61.3	1013	388	1	1	1	427.212	852.409	2	852.409	-0.0003	572	578	0	50.71	36	0.00038	R	HEDSLPR	E
1	RBR1	NGSrhino	Q Exactive	1	no	AT3G12280	Symbols: RBR1, RBR, RB, ATRBR1, RB1 | retinoblastoma-related 1 | chr3:3913671-3918433 REVERSE LENGTH=1013	26294	112105	525	58	61.3	1013	471	1	1	1	432.254	862.494	2	862.491	0.0026	565	571	0	52.27	33	0.00015	K	VIESFIR	H
1	RBR1	NGSrhino	Q Exactive	1	no	AT3G12280	Symbols: RBR1, RBR, RB, ATRBR1, RB1 | retinoblastoma-related 1 | chr3:3913671-3918433 REVERSE LENGTH=1013	26294	112105	525	58	61.3	1013	612	1	1	1	440.724	879.434	2	879.434	-0.0002	681	688	0	57.85	36	7.2e-05	R	NSFTSPVK	D	Deamidated (NQ)	0.20000000.0
1	RBR1	NGSrhino	Q Exactive	1	no	AT3G12280	Symbols: RBR1, RBR, RB, ATRBR1, RB1 | retinoblastoma-related 1 | chr3:3913671-3918433 REVERSE LENGTH=1013	26294	112105	525	58	61.3	1013	695	1	1	1	446.218	890.421	2	890.421	0.0001	954	961	0	45.53	36	0.0013	R	LNNSSSNR	K
1	RBR1	NGSrhino	Q Exactive	1	no	AT3G12280	Symbols: RBR1, RBR, RB, ATRBR1, RB1 | retinoblastoma-related 1 | chr3:3913671-3918433 REVERSE LENGTH=1013	26294	112105	525	58	61.3	1013	792	1	1	1	452.23	902.446	2	902.446	0.0006	946	953	0	52.69	35	0.00021	K	DLSAINNR	L	Deamidated (NQ)	0.00000200.0
1	RBR1	NGSrhino	Q Exactive	1	no	AT3G12280	Symbols: RBR1, RBR, RB, ATRBR1, RB1 | retinoblastoma-related 1 | chr3:3913671-3918433 REVERSE LENGTH=1013	26294	112105	525	58	61.3	1013	979	1	1	1	465.256	928.497	2	928.498	-0.0007	370	378	0	47.46	34	0.0005	K	IDALSSPAR	T
1	RBR1	NGSrhino	Q Exactive	1	no	AT3G12280	Symbols: RBR1, RBR, RB, ATRBR1, RB1 | retinoblastoma-related 1 | chr3:3913671-3918433 REVERSE LENGTH=1013	26294	112105	525	58	61.3	1013	1011	1	1	1	467.235	932.456	2	932.456	-0.0005	443	450	0	55.79	37	0.00015	R	DITNDVTR	R
1	RBR1	NGSrhino	Q Exactive	1	no	AT3G12280	Symbols: RBR1, RBR, RB, ATRBR1, RB1 | retinoblastoma-related 1 | chr3:3913671-3918433 REVERSE LENGTH=1013	26294	112105	525	58	61.3	1013	1191	1	1	1	480.283	958.551	2	958.549	0.0024	118	125	0	37.16	36	0.0077	K	ELPQFVVK	A
1	RBR1	NGSrhino	Q Exactive	1	no	AT3G12280	Symbols: RBR1, RBR, RB, ATRBR1, RB1 | retinoblastoma-related 1 | chr3:3913671-3918433 REVERSE LENGTH=1013	26294	112105	525	58	61.3	1013	1257	1	1	1	484.313	966.611	2	966.611	0.0002	420	428	0	38.87	22	0.00025	R	TVISPLLPK	P
1	RBR1	NGSrhino	Q Exactive	1	no	AT3G12280	Symbols: RBR1, RBR, RB, ATRBR1, RB1 | retinoblastoma-related 1 | chr3:3913671-3918433 REVERSE LENGTH=1013	26294	112105	525	58	61.3	1013	1276	1	1	1	485.754	969.494	2	969.492	0.002	805	811	0	38.55	34	0.0041	R	EIIYNYR	K
1	RBR1	NGSrhino	Q Exactive	1	no	AT3G12280	Symbols: RBR1, RBR, RB, ATRBR1, RB1 | retinoblastoma-related 1 | chr3:3913671-3918433 REVERSE LENGTH=1013	26294	112105	525	58	61.3	1013	1384	1	1	1	493.293	984.572	2	984.572	0.0008	752	759	0	73.26	32	8.8e-07	R	LQLSQQIR	E
1	RBR1	NGSrhino	Q Exactive	1	no	AT3G12280	Symbols: RBR1, RBR, RB, ATRBR1, RB1 | retinoblastoma-related 1 | chr3:3913671-3918433 REVERSE LENGTH=1013	26294	112105	525	58	61.3	1013	1470	1	1	1	498.281	994.548	2	994.549	-0.0003	110	117	0	60.85	32	1.6e-05	K	LNIVDFFK	E
1	RBR1	NGSrhino	Q Exactive	1	no	AT3G12280	Symbols: RBR1, RBR, RB, ATRBR1, RB1 | retinoblastoma-related 1 | chr3:3913671-3918433 REVERSE LENGTH=1013	26294	112105	525	58	61.3	1013	1502	1	1	1	499.749	997.483	2	997.483	0.0004	583	590	0	70.22	34	2.8e-06	R	HLNSLEER	L	Deamidated (NQ)	0.00200000.0
1	RBR1	NGSrhino	Q Exactive	1	no	AT3G12280	Symbols: RBR1, RBR, RB, ATRBR1, RB1 | retinoblastoma-related 1 | chr3:3913671-3918433 REVERSE LENGTH=1013	26294	112105	525	58	61.3	1013	1550	1	1	1	502.777	1003.54	2	1003.54	0.0024	252	261	0	55.86	37	0.00014	K	GVDLVASLCK	I
1	RBR1	NGSrhino	Q Exactive	1	no	AT3G12280	Symbols: RBR1, RBR, RB, ATRBR1, RB1 | retinoblastoma-related 1 | chr3:3913671-3918433 REVERSE LENGTH=1013	26294	112105	525	58	61.3	1013	1900	1	1	1	526.784	1051.55	2	1051.56	-0.0012	555	564	0	94.55	35	1.2e-08	R	TGITAFDLSK	V
1	RBR1	NGSrhino	Q Exactive	1	no	AT3G12280	Symbols: RBR1, RBR, RB, ATRBR1, RB1 | retinoblastoma-related 1 | chr3:3913671-3918433 REVERSE LENGTH=1013	26294	112105	525	58	61.3	1013	1915	1	1	1	527.743	1053.47	2	1053.47	-0.0005	236	244	0	52.86	34	0.00015	R	NFSIQDSSR	F	Deamidated (NQ)	0.200000000.0
1	RBR1	NGSrhino	Q Exactive	1	no	AT3G12280	Symbols: RBR1, RBR, RB, ATRBR1, RB1 | retinoblastoma-related 1 | chr3:3913671-3918433 REVERSE LENGTH=1013	26294	112105	525	58	61.3	1013	2198	1	1	1	546.844	1091.67	2	1091.67	0.0038	858	867	0	67.39	22	3.1e-07	K	PLLVELGPVR	N
1	RBR1	NGSrhino	Q Exactive	1	no	AT3G12280	Symbols: RBR1, RBR, RB, ATRBR1, RB1 | retinoblastoma-related 1 | chr3:3913671-3918433 REVERSE LENGTH=1013	26294	112105	525	58	61.3	1013	2243	1	1	1	549.784	1097.55	2	1097.55	0.0005	796	804	0	57.67	35	5.8e-05	K	ISQMSLTFR	E	Oxidation (M)	0.000300000.0
1	RBR1	NGSrhino	Q Exactive	1	no	AT3G12280	Symbols: RBR1, RBR, RB, ATRBR1, RB1 | retinoblastoma-related 1 | chr3:3913671-3918433 REVERSE LENGTH=1013	26294	112105	525	58	61.3	1013	2435	1	1	1	558.32	1114.63	2	1114.62	0.0018	277	286	0	72.87	35	1.7e-06	K	ANNLVETILK	K	Deamidated (NQ)	0.0200000000.0
1	RBR1	NGSrhino	Q Exactive	1	no	AT3G12280	Symbols: RBR1, RBR, RB, ATRBR1, RB1 | retinoblastoma-related 1 | chr3:3913671-3918433 REVERSE LENGTH=1013	26294	112105	525	58	61.3	1013	2468	1	1	1	559.778	1117.54	2	1117.54	-0.0026	918	927	0	66.68	36	9.3e-06	K	MDALISHSTK	S	Oxidation (M)	0.3000000000.0
1	RBR1	NGSrhino	Q Exactive	1	no	AT3G12280	Symbols: RBR1, RBR, RB, ATRBR1, RB1 | retinoblastoma-related 1 | chr3:3913671-3918433 REVERSE LENGTH=1013	26294	112105	525	58	61.3	1013	2516	1	1	1	562.809	1123.6	2	1123.6	0.0015	429	438	0	67.59	34	4.8e-06	K	PSPGLEHFLK	S
1	RBR1	NGSrhino	Q Exactive	1	no	AT3G12280	Symbols: RBR1, RBR, RB, ATRBR1, RB1 | retinoblastoma-related 1 | chr3:3913671-3918433 REVERSE LENGTH=1013	26294	112105	525	58	61.3	1013	2536	1	1	1	563.816	1125.62	2	1125.62	-0.0004	379	388	0	54.51	32	7.1e-05	R	TFISPLSPHK	S
1	RBR1	NGSrhino	Q Exactive	1	no	AT3G12280	Symbols: RBR1, RBR, RB, ATRBR1, RB1 | retinoblastoma-related 1 | chr3:3913671-3918433 REVERSE LENGTH=1013	26294	112105	525	58	61.3	1013	2598	1	1	1	567.797	1133.58	2	1133.58	0.0003	591	599	0	64.65	37	1.8e-05	R	LLESMVWEK	G
1	RBR1	NGSrhino	Q Exactive	1	no	AT3G12280	Symbols: RBR1, RBR, RB, ATRBR1, RB1 | retinoblastoma-related 1 | chr3:3913671-3918433 REVERSE LENGTH=1013	26294	112105	525	58	61.3	1013	2757	1	1	1	577.798	1153.58	2	1153.58	-0.0018	582	590	1	71.74	35	2.6e-06	R	RHLNSLEER	L	Deamidated (NQ)	0.000200000.0
1	RBR1	NGSrhino	Q Exactive	1	no	AT3G12280	Symbols: RBR1, RBR, RB, ATRBR1, RB1 | retinoblastoma-related 1 | chr3:3913671-3918433 REVERSE LENGTH=1013	26294	112105	525	58	61.3	1013	3227	1	1	1	604.3	1206.59	2	1206.58	0.006	19	29	0	57.5	37	9.9e-05	R	SEASLLDICEK	V
1	RBR1	NGSrhino	Q Exactive	1	no	AT3G12280	Symbols: RBR1, RBR, RB, ATRBR1, RB1 | retinoblastoma-related 1 | chr3:3913671-3918433 REVERSE LENGTH=1013	26294	112105	525	58	61.3	1013	3250	1	1	1	605.784	1209.55	2	1209.55	0.0023	262	271	0	72.55	35	2.2e-06	K	IYDASEDELR	I
1	RBR1	NGSrhino	Q Exactive	1	no	AT3G12280	Symbols: RBR1, RBR, RB, ATRBR1, RB1 | retinoblastoma-related 1 | chr3:3913671-3918433 REVERSE LENGTH=1013	26294	112105	525	58	61.3	1013	3445	1	1	1	618.369	1234.72	2	1234.72	0	193	202	0	56.55	28	1.5e-05	R	FGWLLFLALR	N
1	RBR1	NGSrhino	Q Exactive	1	no	AT3G12280	Symbols: RBR1, RBR, RB, ATRBR1, RB1 | retinoblastoma-related 1 | chr3:3913671-3918433 REVERSE LENGTH=1013	26294	112105	525	58	61.3	1013	3772	1	1	1	635.286	1268.56	2	1268.56	0.0004	653	664	0	68.74	33	3.2e-06	K	HETCPGQNGGIR	S	Deamidated (NQ)	0.000000020000.0
1	RBR1	NGSrhino	Q Exactive	1	no	AT3G12280	Symbols: RBR1, RBR, RB, ATRBR1, RB1 | retinoblastoma-related 1 | chr3:3913671-3918433 REVERSE LENGTH=1013	26294	112105	525	58	61.3	1013	4036	1	1	1	649.332	1296.65	2	1296.65	0.0007	600	611	0	91.57	36	2.8e-08	K	GSSMYNSLIVAR	P
1	RBR1	NGSrhino	Q Exactive	1	no	AT3G12280	Symbols: RBR1, RBR, RB, ATRBR1, RB1 | retinoblastoma-related 1 | chr3:3913671-3918433 REVERSE LENGTH=1013	26294	112105	525	58	61.3	1013	4456	1	1	1	681.87	1361.72	2	1361.72	0.0023	403	416	0	70.18	35	3.6e-06	K	LAATPVSTAMTTAK	W
1	RBR1	NGSrhino	Q Exactive	1	no	AT3G12280	Symbols: RBR1, RBR, RB, ATRBR1, RB1 | retinoblastoma-related 1 | chr3:3913671-3918433 REVERSE LENGTH=1013	26294	112105	525	58	61.3	1013	4461	1	1	1	682.348	1362.68	2	1362.68	-0.0006	18	29	1	42.69	38	0.0034	K	RSEASLLDICEK	V
1	RBR1	NGSrhino	Q Exactive	1	no	AT3G12280	Symbols: RBR1, RBR, RB, ATRBR1, RB1 | retinoblastoma-related 1 | chr3:3913671-3918433 REVERSE LENGTH=1013	26294	112105	525	58	61.3	1013	4652	1	1	1	695.359	1388.7	2	1388.7	0.0016	888	900	0	72.06	37	3.2e-06	K	VSVFPSVPDMSPK	K
1	RBR1	NGSrhino	Q Exactive	1	no	AT3G12280	Symbols: RBR1, RBR, RB, ATRBR1, RB1 | retinoblastoma-related 1 | chr3:3913671-3918433 REVERSE LENGTH=1013	26294	112105	525	58	61.3	1013	4801	1	1	1	703.891	1405.77	2	1405.76	0.0027	543	554	0	66.41	34	6.3e-06	K	TITMLFPAVLER	T	Oxidation (M)	0.000300000000.0
1	RBR1	NGSrhino	Q Exactive	1	no	AT3G12280	Symbols: RBR1, RBR, RB, ATRBR1, RB1 | retinoblastoma-related 1 | chr3:3913671-3918433 REVERSE LENGTH=1013	26294	112105	525	58	61.3	1013	4826	1	1	1	705.355	1408.7	2	1408.7	-0.0024	51	64	0	107.32	37	9.4e-10	R	ILSASMSNIGSGTR	E	Oxidation (M)	0.00000300000000.0
1	RBR1	NGSrhino	Q Exactive	1	no	AT3G12280	Symbols: RBR1, RBR, RB, ATRBR1, RB1 | retinoblastoma-related 1 | chr3:3913671-3918433 REVERSE LENGTH=1013	26294	112105	525	58	61.3	1013	4910	1	1	1	710.888	1419.76	2	1419.76	0.0025	70	80	0	57.36	34	5.2e-05	R	FWFAFILYSVK	R
1	RBR1	NGSrhino	Q Exactive	1	no	AT3G12280	Symbols: RBR1, RBR, RB, ATRBR1, RB1 | retinoblastoma-related 1 | chr3:3913671-3918433 REVERSE LENGTH=1013	26294	112105	525	58	61.3	1013	5039	1	1	1	720.902	1439.79	2	1439.79	0.0001	902	914	0	112.56	33	1.2e-10	K	VSAVHNVYVSPLR	G
1	RBR1	NGSrhino	Q Exactive	1	no	AT3G12280	Symbols: RBR1, RBR, RB, ATRBR1, RB1 | retinoblastoma-related 1 | chr3:3913671-3918433 REVERSE LENGTH=1013	26294	112105	525	58	61.3	1013	5160	1	1	1	724.344	1446.67	2	1446.67	0.0063	167	178	0	75.11	35	1.2e-06	R	EFFLTYDANAEK	N
1	RBR1	NGSrhino	Q Exactive	1	no	AT3G12280	Symbols: RBR1, RBR, RB, ATRBR1, RB1 | retinoblastoma-related 1 | chr3:3913671-3918433 REVERSE LENGTH=1013	26294	112105	525	58	61.3	1013	5187	1	1	1	725.855	1449.7	2	1449.7	-0.0062	30	43	0	56.12	37	0.00012	K	VLSLDGSTCDEALK	L
1	RBR1	NGSrhino	Q Exactive	1	no	AT3G12280	Symbols: RBR1, RBR, RB, ATRBR1, RB1 | retinoblastoma-related 1 | chr3:3913671-3918433 REVERSE LENGTH=1013	26294	112105	525	58	61.3	1013	5386	1	1	1	493.616	1477.83	3	1477.83	0.0001	858	870	1	37.04	32	0.0033	K	PLLVELGPVRNDR	A	Deamidated (NQ)	0.0000000000200.0
1	RBR1	NGSrhino	Q Exactive	1	no	AT3G12280	Symbols: RBR1, RBR, RB, ATRBR1, RB1 | retinoblastoma-related 1 | chr3:3913671-3918433 REVERSE LENGTH=1013	26294	112105	525	58	61.3	1013	6121	1	1	1	526.292	1575.85	3	1575.86	-0.0056	70	81	1	55.3	34	7.6e-05	R	FWFAFILYSVKR	L
1	RBR1	NGSrhino	Q Exactive	1	no	AT3G12280	Symbols: RBR1, RBR, RB, ATRBR1, RB1 | retinoblastoma-related 1 | chr3:3913671-3918433 REVERSE LENGTH=1013	26294	112105	525	58	61.3	1013	6189	1	1	1	792.942	1583.87	2	1583.87	0.0018	146	159	0	102.45	33	1.2e-09	K	EVQANFVHLSLLSK	Y
1	RBR1	NGSrhino	Q Exactive	1	no	AT3G12280	Symbols: RBR1, RBR, RB, ATRBR1, RB1 | retinoblastoma-related 1 | chr3:3913671-3918433 REVERSE LENGTH=1013	26294	112105	525	58	61.3	1013	6248	1	1	1	795.878	1589.74	2	1589.73	0.0093	179	192	0	112.02	35	2.3e-10	K	NSANSSTYLLDSYR	F
1	RBR1	NGSrhino	Q Exactive	1	no	AT3G12280	Symbols: RBR1, RBR, RB, ATRBR1, RB1 | retinoblastoma-related 1 | chr3:3913671-3918433 REVERSE LENGTH=1013	26294	112105	525	58	61.3	1013	6365	1	1	1	807.433	1612.85	2	1611.84	1.0074	701	715	0	75.91	34	8.1e-07	K	MLPPPLQSAFASPTR	P
1	RBR1	NGSrhino	Q Exactive	1	no	AT3G12280	Symbols: RBR1, RBR, RB, ATRBR1, RB1 | retinoblastoma-related 1 | chr3:3913671-3918433 REVERSE LENGTH=1013	26294	112105	525	58	61.3	1013	7083	1	1	1	863.917	1725.82	2	1725.83	-0.0098	760	773	0	82.37	36	2.8e-07	R	ESVYCFFQHVLAQR	T
1	RBR1	NGSrhino	Q Exactive	1	no	AT3G12280	Symbols: RBR1, RBR, RB, ATRBR1, RB1 | retinoblastoma-related 1 | chr3:3913671-3918433 REVERSE LENGTH=1013	26294	112105	525	58	61.3	1013	7100	1	1	1	866.446	1730.88	2	1730.87	0.004	2	17	0	50.94	36	0.00035	M	EEVQPPVTPPIEPNGK	R	Deamidated (NQ)	0.0000000000000200.0
1	RBR1	NGSrhino	Q Exactive	1	no	AT3G12280	Symbols: RBR1, RBR, RB, ATRBR1, RB1 | retinoblastoma-related 1 | chr3:3913671-3918433 REVERSE LENGTH=1013	26294	112105	525	58	61.3	1013	7134	1	1	1	868.914	1735.81	2	1735.82	-0.0023	126	141	0	89.3	36	5.1e-08	K	AGSVLGELYGADWENR	L
1	RBR1	NGSrhino	Q Exactive	1	no	AT3G12280	Symbols: RBR1, RBR, RB, ATRBR1, RB1 | retinoblastoma-related 1 | chr3:3913671-3918433 REVERSE LENGTH=1013	26294	112105	525	58	61.3	1013	8328	1	1	1	646.036	1935.09	3	1935.09	0	110	125	1	43.27	28	0.00034	K	LNIVDFFKELPQFVVK	A
1	RBR1	NGSrhino	Q Exactive	1	no	AT3G12280	Symbols: RBR1, RBR, RB, ATRBR1, RB1 | retinoblastoma-related 1 | chr3:3913671-3918433 REVERSE LENGTH=1013	26294	112105	525	58	61.3	1013	9318	1	1	1	519.059	2072.21	4	2072.2	0.0036	420	438	1	56.85	23	4.1e-06	R	TVISPLLPKPSPGLEHFLK	S
1	RBR1	NGSrhino	Q Exactive	1	no	AT3G12280	Symbols: RBR1, RBR, RB, ATRBR1, RB1 | retinoblastoma-related 1 | chr3:3913671-3918433 REVERSE LENGTH=1013	26294	112105	525	58	61.3	1013	9547	1	1	1	708.035	2121.08	3	2121.08	0.0014	506	524	0	110.73	35	3.1e-10	K	AEAQILHANNLNSLLTNER	F	Deamidated (NQ)	0.0000000002000000000.0
1	RBR1	NGSrhino	Q Exactive	1	no	AT3G12280	Symbols: RBR1, RBR, RB, ATRBR1, RB1 | retinoblastoma-related 1 | chr3:3913671-3918433 REVERSE LENGTH=1013	26294	112105	525	58	61.3	1013	10891	1	1	1	1201.14	2400.27	2	2400.27	-0.0021	837	857	0	121.37	33	1.5e-11	R	IGPDHVDIITFYNEIFIPAVK	P
1	RBR1	NGSrhino	Q Exactive	1	no	AT3G12280	Symbols: RBR1, RBR, RB, ATRBR1, RB1 | retinoblastoma-related 1 | chr3:3913671-3918433 REVERSE LENGTH=1013	26294	112105	525	58	61.3	1013	11515	1	1	1	1289.18	2576.34	2	2576.33	0.0061	342	367	0	183.86	33	1e-17	R	VFINEEDSLLGSGSLSAGAVNITGVK	R
1	RBR1	NGSrhino	Q Exactive	1	no	AT3G12280	Symbols: RBR1, RBR, RB, ATRBR1, RB1 | retinoblastoma-related 1 | chr3:3913671-3918433 REVERSE LENGTH=1013	26294	112105	525	58	61.3	1013	13255	1	1	1	1692.85	3383.68	2	3383.68	0.0009	300	329	0	177.72	34	5.2e-17	K	LDNIDPDGLTYFEDLLEETSISTSLITLEK	D
1	RBR1	NGSrhino	Q Exactive	1	no	AT3G12280	Symbols: RBR1, RBR, RB, ATRBR1, RB1 | retinoblastoma-related 1 | chr3:3913671-3918433 REVERSE LENGTH=1013	26294	112105	525	58	61.3	1013	13364	1	1	1	869.489	3473.93	4	3473.93	-0.0053	837	867	1	97.29	24	5.5e-10	R	IGPDHVDIITFYNEIFIPAVKPLLVELGPVR	N
1	RBR1	NGSrhino	Q Exactive	1	no	AT3G12280	Symbols: RBR1, RBR, RB, ATRBR1, RB1 | retinoblastoma-related 1 | chr3:3913671-3918433 REVERSE LENGTH=1013	26294	112105	525	58	61.3	1013	13999	1	1	1	1054.8	4215.17	4	4215.19	-0.0144	612	652	0	148.84	29	1.2e-14	R	PSLALEINQLGLLAEPMPSLDAIAALINFSDGANHASSVQK	H
1	RBR1	NGSrhino	Q Exactive	2	yes	AT5G02500	Symbols: HSC70-1, HSP70-1, AT-HSC70-1, HSC70 | heat shock cognate protein 70-1 | chr5:554055-556334 REVERSE LENGTH=651	3392	71313	62	23	55.9	651	52	1	1	0	402.727	803.439	2	803.439	0.0003	507	513	0	48.2	37	0.00094	K	ITITNDK	G
1	RBR1	NGSrhino	Q Exactive	2	yes	AT5G02500	Symbols: HSC70-1, HSP70-1, AT-HSC70-1, HSC70 | heat shock cognate protein 70-1 | chr5:554055-556334 REVERSE LENGTH=651	3392	71313	62	23	55.9	651	759	1	1	0	450.748	899.482	2	899.482	-0.0003	257	264	1	61.47	34	1.8e-05	K	KDITGNPR	A
1	RBR1	NGSrhino	Q Exactive	2	yes	AT5G02500	Symbols: HSC70-1, HSP70-1, AT-HSC70-1, HSC70 | heat shock cognate protein 70-1 | chr5:554055-556334 REVERSE LENGTH=651	3392	71313	62	23	55.9	651	3288	1	1	0	608.33	1214.64	2	1214.64	0.0005	164	175	0	65.67	36	1.2e-05	K	DAGVIAGLNVMR	I
1	RBR1	NGSrhino	Q Exactive	2	yes	AT5G02500	Symbols: HSC70-1, HSP70-1, AT-HSC70-1, HSC70 | heat shock cognate protein 70-1 | chr5:554055-556334 REVERSE LENGTH=651	3392	71313	62	23	55.9	651	3384	1	1	0	614.816	1227.62	2	1227.62	-0.0036	29	39	0	66.7	34	6.7e-06	R	VEIIANDQGNR	T
1	RBR1	NGSrhino	Q Exactive	2	yes	AT5G02500	Symbols: HSC70-1, HSP70-1, AT-HSC70-1, HSC70 | heat shock cognate protein 70-1 | chr5:554055-556334 REVERSE LENGTH=651	3392	71313	62	23	55.9	651	3892	1	1	0	639.82	1277.63	2	1277.62	0.0027	243	252	0	71.21	37	4e-06	R	MVNHFVQEFK	R
1	RBR1	NGSrhino	Q Exactive	2	yes	AT5G02500	Symbols: HSC70-1, HSP70-1, AT-HSC70-1, HSC70 | heat shock cognate protein 70-1 | chr5:554055-556334 REVERSE LENGTH=651	3392	71313	62	23	55.9	651	4122	1	1	0	657.314	1312.61	2	1312.61	0.0012	308	317	0	77.43	35	6.9e-07	R	FEELNMDLFR	K
1	RBR1	NGSrhino	Q Exactive	2	yes	AT5G02500	Symbols: HSC70-1, HSP70-1, AT-HSC70-1, HSC70 | heat shock cognate protein 70-1 | chr5:554055-556334 REVERSE LENGTH=651	3392	71313	62	23	55.9	651	4436	1	1	0	680.303	1358.59	2	1358.59	-0.0002	546	556	0	71.4	32	1.4e-06	K	NALENYAYNMR	N	Deamidated (NQ)	0.00000000200.0
1	RBR1	NGSrhino	Q Exactive	2	yes	AT5G02500	Symbols: HSC70-1, HSP70-1, AT-HSC70-1, HSC70 | heat shock cognate protein 70-1 | chr5:554055-556334 REVERSE LENGTH=651	3392	71313	62	23	55.9	651	4946	1	1	1	713.885	1425.75	2	1425.76	-0.0032	335	348	0	55.28	34	8.6e-05	K	STVHDVVLVGGSTR	I
1	RBR1	NGSrhino	Q Exactive	2	yes	AT5G02500	Symbols: HSC70-1, HSP70-1, AT-HSC70-1, HSC70 | heat shock cognate protein 70-1 | chr5:554055-556334 REVERSE LENGTH=651	3392	71313	62	23	55.9	651	5023	1	1	0	719.373	1436.73	2	1436.73	0.0017	352	363	0	83.87	36	2e-07	K	VQQLLQDFFNGK	E	Deamidated (NQ)	0.000000000200.0
1	RBR1	NGSrhino	Q Exactive	2	yes	AT5G02500	Symbols: HSC70-1, HSP70-1, AT-HSC70-1, HSC70 | heat shock cognate protein 70-1 | chr5:554055-556334 REVERSE LENGTH=651	3392	71313	62	23	55.9	651	5322	1	1	0	737.346	1472.68	2	1472.68	-0.0005	40	52	0	61.53	34	2.1e-05	R	TTPSYVAFTDSER	L
1	RBR1	NGSrhino	Q Exactive	2	yes	AT5G02500	Symbols: HSC70-1, HSP70-1, AT-HSC70-1, HSC70 | heat shock cognate protein 70-1 | chr5:554055-556334 REVERSE LENGTH=651	3392	71313	62	23	55.9	651	6073	1	1	1	783.909	1565.8	2	1565.8	0.0032	117	130	0	88.81	36	5.6e-08	K	EFAAEEISSMVLIK	M
1	RBR1	NGSrhino	Q Exactive	2	yes	AT5G02500	Symbols: HSC70-1, HSP70-1, AT-HSC70-1, HSC70 | heat shock cognate protein 70-1 | chr5:554055-556334 REVERSE LENGTH=651	3392	71313	62	23	55.9	651	6643	1	1	0	824.413	1646.81	2	1646.81	0.0019	60	74	0	111.33	36	3.6e-10	K	NQVAMNPVNTVFDAK	R
1	RBR1	NGSrhino	Q Exactive	2	yes	AT5G02500	Symbols: HSC70-1, HSP70-1, AT-HSC70-1, HSC70 | heat shock cognate protein 70-1 | chr5:554055-556334 REVERSE LENGTH=651	3392	71313	62	23	55.9	651	6741	1	1	0	830.453	1658.89	2	1658.89	0.0041	176	191	0	103.17	34	1.4e-09	R	IINEPTAAAIAYGLDK	K
1	RBR1	NGSrhino	Q Exactive	2	yes	AT5G02500	Symbols: HSC70-1, HSP70-1, AT-HSC70-1, HSC70 | heat shock cognate protein 70-1 | chr5:554055-556334 REVERSE LENGTH=651	3392	71313	62	23	55.9	651	6818	1	1	0	838.37	1674.72	2	1674.72	0.0012	227	242	0	100.01	32	2e-09	K	ATAGDTHLGGEDFDNR	M
1	RBR1	NGSrhino	Q Exactive	2	yes	AT5G02500	Symbols: HSC70-1, HSP70-1, AT-HSC70-1, HSC70 | heat shock cognate protein 70-1 | chr5:554055-556334 REVERSE LENGTH=651	3392	71313	62	23	55.9	651	6836	1	1	0	840.921	1679.83	2	1679.83	0.0016	145	159	0	78.1	37	7.8e-07	K	NAVVTVPAYFNDSQR	Q
1	RBR1	NGSrhino	Q Exactive	2	yes	AT5G02500	Symbols: HSC70-1, HSP70-1, AT-HSC70-1, HSC70 | heat shock cognate protein 70-1 | chr5:554055-556334 REVERSE LENGTH=651	3392	71313	62	23	55.9	651	7709	1	1	1	911.976	1821.94	2	1821.93	0.0048	97	112	1	106.1	35	9.2e-10	K	IQAGPADKPMIYVEYK	G
1	RBR1	NGSrhino	Q Exactive	2	yes	AT5G02500	Symbols: HSC70-1, HSP70-1, AT-HSC70-1, HSC70 | heat shock cognate protein 70-1 | chr5:554055-556334 REVERSE LENGTH=651	3392	71313	62	23	55.9	651	11384	1	1	1	1280.63	2559.25	2	2559.25	0.0056	368	393	0	121.14	35	2.9e-11	K	SINPDEAVAYGAAVQGAILSGEGNEK	V
1	RBR1	NGSrhino	Q Exactive	2	yes	AT5G02500	Symbols: HSC70-1, HSP70-1, AT-HSC70-1, HSC70 | heat shock cognate protein 70-1 | chr5:554055-556334 REVERSE LENGTH=651	3392	71313	62	23	55.9	651	11846	1	1	1	1367.08	2732.14	2	2732.14	0	616	646	0	199.86	30	1.2e-19	K	MYQGAGGEAGGPGASGMDDDAPPASGGAGPK	I
1	RBR1	NGSrhino	Q Exactive	2	yes	AT5G02500	Symbols: HSC70-1, HSP70-1, AT-HSC70-1, HSC70 | heat shock cognate protein 70-1 | chr5:554055-556334 REVERSE LENGTH=651	3392	71313	62	23	55.9	651	12054	1	1	0	1393.69	2785.36	2	2785.36	0.002	430	453	1	162.79	35	2.1e-15	K	KEQVFSTYSDNQPGVLIQVYEGER	A
1	RBR1	NGSrhino	Q Exactive	2	yes	AT5G02500	Symbols: HSC70-1, HSP70-1, AT-HSC70-1, HSC70 | heat shock cognate protein 70-1 | chr5:554055-556334 REVERSE LENGTH=651	3392	71313	62	23	55.9	651	12525	1	1	0	975.855	2924.54	3	2924.54	-0.0007	200	226	0	149.85	31	1.6e-14	K	NVLIFDLGGGTFDVSLLTIEEGIFEVK	A
1	RBR1	NGSrhino	Q Exactive	2	yes	AT5G02500	Symbols: HSC70-1, HSP70-1, AT-HSC70-1, HSC70 | heat shock cognate protein 70-1 | chr5:554055-556334 REVERSE LENGTH=651	3392	71313	62	23	55.9	651	12692	1	1	1	1007.47	3019.39	3	3019.39	-0.0046	576	601	0	144.4	35	1.2e-13	K	IEDSIEQAIQWLEGNQLAEADEFEDK	M
1	RBR1	NGSrhino	Q Exactive	2	yes	AT5G02500	Symbols: HSC70-1, HSP70-1, AT-HSC70-1, HSC70 | heat shock cognate protein 70-1 | chr5:554055-556334 REVERSE LENGTH=651	3392	71313	62	23	55.9	651	12709	1	1	1	1012.57	3034.69	3	3034.7	-0.0095	394	422	0	167.16	26	8e-17	K	VQDLLLLDVTPLSLGLETAGGVMTTLIPR	N
1	RBR1	NGSrhino	Q Exactive	2	yes	AT5G02500	Symbols: HSC70-1, HSP70-1, AT-HSC70-1, HSC70 | heat shock cognate protein 70-1 | chr5:554055-556334 REVERSE LENGTH=651	3392	71313	62	23	55.9	651	12928	1	1	1	1050.17	3147.49	3	3147.49	-0.0005	575	601	1	138.76	35	4.7e-13	K	KIEDSIEQAIQWLEGNQLAEADEFEDK	M
1	RBR1	NGSrhino	Q Exactive	3	yes	AT3G09440	Symbols: | Heat shock protein 70 (Hsp 70) family protein | chr3:2903434-2905632 REVERSE LENGTH=649	2418	71103	52	23	57.2	649	52	1	0	0	402.727	803.439	2	803.439	0.0003	507	513	0	48.2	37	0.00094	K	ITITNDK	G
1	RBR1	NGSrhino	Q Exactive	3	yes	AT3G09440	Symbols: | Heat shock protein 70 (Hsp 70) family protein | chr3:2903434-2905632 REVERSE LENGTH=649	2418	71103	52	23	57.2	649	655	1	1	1	443.741	885.467	2	885.467	0.0001	257	264	1	59.7	33	2.6e-05	K	KDISGNPR	A
1	RBR1	NGSrhino	Q Exactive	3	yes	AT3G09440	Symbols: | Heat shock protein 70 (Hsp 70) family protein | chr3:2903434-2905632 REVERSE LENGTH=649	2418	71103	52	23	57.2	649	3288	1	0	0	608.33	1214.64	2	1214.64	0.0005	164	175	0	65.67	36	1.2e-05	K	DAGVIAGLNVMR	I
1	RBR1	NGSrhino	Q Exactive	3	yes	AT3G09440	Symbols: | Heat shock protein 70 (Hsp 70) family protein | chr3:2903434-2905632 REVERSE LENGTH=649	2418	71103	52	23	57.2	649	3372	1	1	1	613.8	1225.59	2	1225.58	0.0033	81	91	0	69.66	35	3.8e-06	R	FTDSSVQSDIK	L
1	RBR1	NGSrhino	Q Exactive	3	yes	AT3G09440	Symbols: | Heat shock protein 70 (Hsp 70) family protein | chr3:2903434-2905632 REVERSE LENGTH=649	2418	71103	52	23	57.2	649	3384	1	0	0	614.816	1227.62	2	1227.62	-0.0036	29	39	0	66.7	34	6.7e-06	R	VEIIANDQGNR	T
1	RBR1	NGSrhino	Q Exactive	3	yes	AT3G09440	Symbols: | Heat shock protein 70 (Hsp 70) family protein | chr3:2903434-2905632 REVERSE LENGTH=649	2418	71103	52	23	57.2	649	3892	1	0	0	639.82	1277.63	2	1277.62	0.0027	243	252	0	71.21	37	4e-06	R	MVNHFVQEFK	R
1	RBR1	NGSrhino	Q Exactive	3	yes	AT3G09440	Symbols: | Heat shock protein 70 (Hsp 70) family protein | chr3:2903434-2905632 REVERSE LENGTH=649	2418	71103	52	23	57.2	649	4025	1	1	1	648.337	1294.66	2	1294.66	0.0048	308	317	0	76.24	36	1.1e-06	R	FEELNIDLFR	K
1	RBR1	NGSrhino	Q Exactive	3	yes	AT3G09440	Symbols: | Heat shock protein 70 (Hsp 70) family protein | chr3:2903434-2905632 REVERSE LENGTH=649	2418	71103	52	23	57.2	649	4436	1	0	0	680.303	1358.59	2	1358.59	-0.0002	546	556	0	71.4	32	1.4e-06	K	NALENYAYNMR	N	Deamidated (NQ)	0.00000000200.0
1	RBR1	NGSrhino	Q Exactive	3	yes	AT3G09440	Symbols: | Heat shock protein 70 (Hsp 70) family protein | chr3:2903434-2905632 REVERSE LENGTH=649	2418	71103	52	23	57.2	649	4821	1	1	1	704.878	1407.74	2	1407.74	0.0014	352	363	0	87.56	35	6.4e-08	K	VQQLLVDFFNGK	E	Deamidated (NQ)	0.000000000200.0
1	RBR1	NGSrhino	Q Exactive	3	yes	AT3G09440	Symbols: | Heat shock protein 70 (Hsp 70) family protein | chr3:2903434-2905632 REVERSE LENGTH=649	2418	71103	52	23	57.2	649	4980	1	1	1	716.376	1430.74	2	1430.74	0.001	335	348	0	99.44	36	5.4e-09	K	NSIDDVVLVGGSTR	I
1	RBR1	NGSrhino	Q Exactive	3	yes	AT3G09440	Symbols: | Heat shock protein 70 (Hsp 70) family protein | chr3:2903434-2905632 REVERSE LENGTH=649	2418	71103	52	23	57.2	649	5322	1	0	0	737.346	1472.68	2	1472.68	-0.0005	40	52	0	61.53	34	2.1e-05	R	TTPSYVAFTDSER	L
1	RBR1	NGSrhino	Q Exactive	3	yes	AT3G09440	Symbols: | Heat shock protein 70 (Hsp 70) family protein | chr3:2903434-2905632 REVERSE LENGTH=649	2418	71103	52	23	57.2	649	5913	1	1	1	766.91	1531.81	2	1531.81	-0.0011	99	112	1	76.54	36	9.2e-07	K	SGPAEKPMIVVNYK	G
1	RBR1	NGSrhino	Q Exactive	3	yes	AT3G09440	Symbols: | Heat shock protein 70 (Hsp 70) family protein | chr3:2903434-2905632 REVERSE LENGTH=649	2418	71103	52	23	57.2	649	6278	1	1	1	532.945	1595.81	3	1595.81	0.0013	117	130	0	74.03	36	1.6e-06	K	EFSAEEISSMILIK	M
1	RBR1	NGSrhino	Q Exactive	3	yes	AT3G09440	Symbols: | Heat shock protein 70 (Hsp 70) family protein | chr3:2903434-2905632 REVERSE LENGTH=649	2418	71103	52	23	57.2	649	6741	1	0	0	830.453	1658.89	2	1658.89	0.0041	176	191	0	103.17	34	1.4e-09	R	IINEPTAAAIAYGLDK	K
1	RBR1	NGSrhino	Q Exactive	3	yes	AT3G09440	Symbols: | Heat shock protein 70 (Hsp 70) family protein | chr3:2903434-2905632 REVERSE LENGTH=649	2418	71103	52	23	57.2	649	6753	1	1	1	831.42	1660.83	2	1660.82	0.001	60	74	0	75.31	36	1.4e-06	K	NQVAMNPINTVFDAK	R
1	RBR1	NGSrhino	Q Exactive	3	yes	AT3G09440	Symbols: | Heat shock protein 70 (Hsp 70) family protein | chr3:2903434-2905632 REVERSE LENGTH=649	2418	71103	52	23	57.2	649	6818	1	0	0	838.37	1674.72	2	1674.72	0.0012	227	242	0	100.01	32	2e-09	K	ATAGDTHLGGEDFDNR	M
1	RBR1	NGSrhino	Q Exactive	3	yes	AT3G09440	Symbols: | Heat shock protein 70 (Hsp 70) family protein | chr3:2903434-2905632 REVERSE LENGTH=649	2418	71103	52	23	57.2	649	6836	1	0	0	840.921	1679.83	2	1679.83	0.0016	145	159	0	78.1	37	7.8e-07	K	NAVVTVPAYFNDSQR	Q
1	RBR1	NGSrhino	Q Exactive	3	yes	AT3G09440	Symbols: | Heat shock protein 70 (Hsp 70) family protein | chr3:2903434-2905632 REVERSE LENGTH=649	2418	71103	52	23	57.2	649	11411	1	1	0	858.764	2573.27	3	2573.26	0.0091	368	393	0	97.66	35	5.9e-09	K	SINPDEAVAYGAAVQAAILSGEGNEK	V
1	RBR1	NGSrhino	Q Exactive	3	yes	AT3G09440	Symbols: | Heat shock protein 70 (Hsp 70) family protein | chr3:2903434-2905632 REVERSE LENGTH=649	2418	71103	52	23	57.2	649	11637	1	1	1	1316.08	2630.14	2	2630.14	0.0019	616	644	0	145.57	32	4.6e-14	K	MYQGGEAGGPAAGGMDEDVPPSAGGAGPK	I
1	RBR1	NGSrhino	Q Exactive	3	yes	AT3G09440	Symbols: | Heat shock protein 70 (Hsp 70) family protein | chr3:2903434-2905632 REVERSE LENGTH=649	2418	71103	52	23	57.2	649	12054	1	0	0	1393.69	2785.36	2	2785.36	0.002	430	453	1	162.79	35	2.1e-15	K	KEQVFSTYSDNQPGVLIQVYEGER	A
1	RBR1	NGSrhino	Q Exactive	3	yes	AT3G09440	Symbols: | Heat shock protein 70 (Hsp 70) family protein | chr3:2903434-2905632 REVERSE LENGTH=649	2418	71103	52	23	57.2	649	12525	1	0	0	975.855	2924.54	3	2924.54	-0.0007	200	226	0	149.85	31	1.6e-14	K	NVLIFDLGGGTFDVSLLTIEEGIFEVK	A
1	RBR1	NGSrhino	Q Exactive	3	yes	AT3G09440	Symbols: | Heat shock protein 70 (Hsp 70) family protein | chr3:2903434-2905632 REVERSE LENGTH=649	2418	71103	52	23	57.2	649	12652	1	1	1	993.17	2976.49	3	2975.47	1.0217	279	305	0	59.03	35	4.1e-05	R	TLSSTAQTTIEIDSLFDGIDFYAPITR	A	Deamidated (NQ)	0.000000200000000000000000000.0
1	RBR1	NGSrhino	Q Exactive	3	yes	AT3G09440	Symbols: | Heat shock protein 70 (Hsp 70) family protein | chr3:2903434-2905632 REVERSE LENGTH=649	2418	71103	52	23	57.2	649	12809	1	1	1	1022.25	3063.73	3	3063.73	0.0034	394	422	0	96.48	25	8.7e-10	K	VQDLLLLDVTPLSLGLETAGGVMTVLIQR	N
1	RBR1	NGSrhino	Q Exactive	4	no	AT5G22220	Symbols: E2F1, E2FB, ATE2FB | E2F transcription factor 1 | chr5:7360749-7364120 FORWARD LENGTH=469	2129	51622	35	17	59.5	469	74	1	1	1	405.193	808.372	2	808.371	0.0009	36	42	0	38.47	34	0.0044	R	FDAAETR	G
1	RBR1	NGSrhino	Q Exactive	4	no	AT5G22220	Symbols: E2F1, E2FB, ATE2FB | E2F transcription factor 1 | chr5:7360749-7364120 FORWARD LENGTH=469	2129	51622	35	17	59.5	469	2225	1	1	0	548.799	1095.58	2	1095.58	0.0019	130	139	0	78.21	34	4.3e-07	R	YDSSLGLLTK	K
1	RBR1	NGSrhino	Q Exactive	4	no	AT5G22220	Symbols: E2F1, E2FB, ATE2FB | E2F transcription factor 1 | chr5:7360749-7364120 FORWARD LENGTH=469	2129	51622	35	17	59.5	469	3077	1	1	1	596.827	1191.64	2	1191.64	0.0018	247	256	0	83.89	35	1.4e-07	R	LLFVTENDIK	N	Deamidated (NQ)	0.0000002000.0
1	RBR1	NGSrhino	Q Exactive	4	no	AT5G22220	Symbols: E2F1, E2FB, ATE2FB | E2F transcription factor 1 | chr5:7360749-7364120 FORWARD LENGTH=469	2129	51622	35	17	59.5	469	3285	1	1	1	608.314	1214.61	2	1214.61	-0.0008	147	157	0	82.75	35	2.1e-07	K	QAEDGILDLNK	A
1	RBR1	NGSrhino	Q Exactive	4	no	AT5G22220	Symbols: E2F1, E2FB, ATE2FB | E2F transcription factor 1 | chr5:7360749-7364120 FORWARD LENGTH=469	2129	51622	35	17	59.5	469	4784	1	1	1	702.837	1403.66	2	1403.66	0.0033	2	13	0	44.99	35	0.0013	M	SEEVPQQFPSSK	R	Acetyl (Protein N-term)	1.000000000000.0
1	RBR1	NGSrhino	Q Exactive	4	no	AT5G22220	Symbols: E2F1, E2FB, ATE2FB | E2F transcription factor 1 | chr5:7360749-7364120 FORWARD LENGTH=469	2129	51622	35	17	59.5	469	5279	1	1	1	733.314	1464.61	2	1464.62	-0.0017	365	376	0	69.88	31	1.6e-06	R	NMETQEVDDTQR	V
1	RBR1	NGSrhino	Q Exactive	4	no	AT5G22220	Symbols: E2F1, E2FB, ATE2FB | E2F transcription factor 1 | chr5:7360749-7364120 FORWARD LENGTH=469	2129	51622	35	17	59.5	469	6287	1	1	1	799.941	1597.87	2	1597.87	-0.0009	43	59	0	94.68	33	7.7e-09	R	GGGAVADQVVSDAIVIK	S
1	RBR1	NGSrhino	Q Exactive	4	no	AT5G22220	Symbols: E2F1, E2FB, ATE2FB | E2F transcription factor 1 | chr5:7360749-7364120 FORWARD LENGTH=469	2129	51622	35	17	59.5	469	7399	1	1	0	895.5	1788.99	2	1788.99	-0.001	169	184	0	111.72	33	1.4e-10	R	IYDITNVLEGIGLIEK	T
1	RBR1	NGSrhino	Q Exactive	4	no	AT5G22220	Symbols: E2F1, E2FB, ATE2FB | E2F transcription factor 1 | chr5:7360749-7364120 FORWARD LENGTH=469	2129	51622	35	17	59.5	469	7702	1	1	1	911.941	1821.87	2	1821.88	-0.0081	393	407	0	95.48	36	1.3e-08	K	IVPPDLDMGVDYWFR	S
1	RBR1	NGSrhino	Q Exactive	4	no	AT5G22220	Symbols: E2F1, E2FB, ATE2FB | E2F transcription factor 1 | chr5:7360749-7364120 FORWARD LENGTH=469	2129	51622	35	17	59.5	469	7870	1	1	1	927.935	1853.85	2	1853.85	0.0043	377	392	0	112.65	35	2e-10	R	VYSDIESHDFVDGIMK	I
1	RBR1	NGSrhino	Q Exactive	4	no	AT5G22220	Symbols: E2F1, E2FB, ATE2FB | E2F transcription factor 1 | chr5:7360749-7364120 FORWARD LENGTH=469	2129	51622	35	17	59.5	469	9476	1	1	1	1055.5	2108.98	2	2108.98	0.0037	271	290	0	107.48	35	6.9e-10	K	APHGTTLEVPDPDEAGGYQR	R
1	RBR1	NGSrhino	Q Exactive	4	no	AT5G22220	Symbols: E2F1, E2FB, ATE2FB | E2F transcription factor 1 | chr5:7360749-7364120 FORWARD LENGTH=469	2129	51622	35	17	59.5	469	9866	1	1	1	1085.04	2168.06	2	2168.06	0.0026	445	464	0	82.57	36	2.4e-07	K	ILEQPQTPSSPTPEESTATR	S
1	RBR1	NGSrhino	Q Exactive	4	no	AT5G22220	Symbols: E2F1, E2FB, ATE2FB | E2F transcription factor 1 | chr5:7360749-7364120 FORWARD LENGTH=469	2129	51622	35	17	59.5	469	10778	1	1	1	590.811	2359.21	4	2359.21	0.004	15	35	1	52.02	34	0.00019	R	QLHPSLSSMKPPLVAPGEYHR	F	Oxidation (M)	0.000000003000000000000.0
1	RBR1	NGSrhino	Q Exactive	4	no	AT5G22220	Symbols: E2F1, E2FB, ATE2FB | E2F transcription factor 1 | chr5:7360749-7364120 FORWARD LENGTH=469	2129	51622	35	17	59.5	469	11574	1	1	1	1299.14	2596.26	2	2596.26	0.0033	200	223	0	211.94	36	2.6e-20	K	PGETIESIANLQDEVQNLAAEEAR	L
1	RBR1	NGSrhino	Q Exactive	4	no	AT5G22220	Symbols: E2F1, E2FB, ATE2FB | E2F transcription factor 1 | chr5:7360749-7364120 FORWARD LENGTH=469	2129	51622	35	17	59.5	469	11711	1	1	1	1334.22	2666.42	2	2666.41	0.0058	66	90	0	171.31	31	1.1e-16	K	TDLVNQIVEVNELNTGVLQTPVSGK	G
1	RBR1	NGSrhino	Q Exactive	4	no	AT5G22220	Symbols: E2F1, E2FB, ATE2FB | E2F transcription factor 1 | chr5:7360749-7364120 FORWARD LENGTH=469	2129	51622	35	17	59.5	469	12988	1	1	1	1066.2	3195.59	3	3195.59	-0.0005	194	223	1	167.33	34	5.4e-16	K	GLDVSKPGETIESIANLQDEVQNLAAEEAR	L
1	RBR1	NGSrhino	Q Exactive	4	no	AT5G22220	Symbols: E2F1, E2FB, ATE2FB | E2F transcription factor 1 | chr5:7360749-7364120 FORWARD LENGTH=469	2129	51622	35	17	59.5	469	13908	1	1	1	1378.92	4133.75	3	4133.75	-0.0045	408	444	0	95.55	28	1.9e-09	R	SEVGEVSITDMWPDESGPDWNQMITFDQDHAGPSDNK	I
1	RBR1	NGSrhino	Q Exactive	5	yes	AT3G12580	Symbols: HSP70, ATHSP70 | heat shock protein 70 | chr3:3991487-3993689 REVERSE LENGTH=650	1991	71057	44	21	47.5	650	52	1	0	0	402.727	803.439	2	803.439	0.0003	507	513	0	48.2	37	0.00094	K	ITITNDK	G
1	RBR1	NGSrhino	Q Exactive	5	yes	AT3G12580	Symbols: HSP70, ATHSP70 | heat shock protein 70 | chr3:3991487-3993689 REVERSE LENGTH=650	1991	71057	44	21	47.5	650	759	1	0	0	450.748	899.482	2	899.482	-0.0003	257	264	1	61.47	34	1.8e-05	K	KDITGNPR	A
1	RBR1	NGSrhino	Q Exactive	5	yes	AT3G12580	Symbols: HSP70, ATHSP70 | heat shock protein 70 | chr3:3991487-3993689 REVERSE LENGTH=650	1991	71057	44	21	47.5	650	2393	1	1	1	555.259	1108.5	2	1108.5	-0.0002	81	90	0	68.22	34	4.7e-06	R	YSDPSVQADK	S
1	RBR1	NGSrhino	Q Exactive	5	yes	AT3G12580	Symbols: HSP70, ATHSP70 | heat shock protein 70 | chr3:3991487-3993689 REVERSE LENGTH=650	1991	71057	44	21	47.5	650	3384	1	0	0	614.816	1227.62	2	1227.62	-0.0036	29	39	0	66.7	34	6.7e-06	R	VEIIANDQGNR	T
1	RBR1	NGSrhino	Q Exactive	5	yes	AT3G12580	Symbols: HSP70, ATHSP70 | heat shock protein 70 | chr3:3991487-3993689 REVERSE LENGTH=650	1991	71057	44	21	47.5	650	3411	1	1	1	616.327	1230.64	2	1230.64	0.0006	164	175	0	65.57	36	1.3e-05	K	DAGVISGLNVMR	I
1	RBR1	NGSrhino	Q Exactive	5	yes	AT3G12580	Symbols: HSP70, ATHSP70 | heat shock protein 70 | chr3:3991487-3993689 REVERSE LENGTH=650	1991	71057	44	21	47.5	650	3667	1	1	1	630.846	1259.68	2	1259.68	0.0019	133	144	0	80.15	36	4e-07	R	EIAEAFLGSPVK	N
1	RBR1	NGSrhino	Q Exactive	5	yes	AT3G12580	Symbols: HSP70, ATHSP70 | heat shock protein 70 | chr3:3991487-3993689 REVERSE LENGTH=650	1991	71057	44	21	47.5	650	3892	1	0	0	639.82	1277.63	2	1277.62	0.0027	243	252	0	71.21	37	4e-06	R	MVNHFVQEFK	R
1	RBR1	NGSrhino	Q Exactive	5	yes	AT3G12580	Symbols: HSP70, ATHSP70 | heat shock protein 70 | chr3:3991487-3993689 REVERSE LENGTH=650	1991	71057	44	21	47.5	650	4122	1	0	0	657.314	1312.61	2	1312.61	0.0012	308	317	0	77.43	35	6.9e-07	R	FEELNMDLFR	K
1	RBR1	NGSrhino	Q Exactive	5	yes	AT3G12580	Symbols: HSP70, ATHSP70 | heat shock protein 70 | chr3:3991487-3993689 REVERSE LENGTH=650	1991	71057	44	21	47.5	650	4436	1	0	0	680.303	1358.59	2	1358.59	-0.0002	546	556	0	71.4	32	1.4e-06	K	NALENYAYNMR	N	Deamidated (NQ)	0.00000000200.0
1	RBR1	NGSrhino	Q Exactive	5	yes	AT3G12580	Symbols: HSP70, ATHSP70 | heat shock protein 70 | chr3:3991487-3993689 REVERSE LENGTH=650	1991	71057	44	21	47.5	650	4841	1	1	0	706.876	1411.74	2	1411.74	-0.0036	335	348	0	61.5	34	2.1e-05	K	SSVHDVVLVGGSTR	I
1	RBR1	NGSrhino	Q Exactive	5	yes	AT3G12580	Symbols: HSP70, ATHSP70 | heat shock protein 70 | chr3:3991487-3993689 REVERSE LENGTH=650	1991	71057	44	21	47.5	650	5023	1	0	0	719.373	1436.73	2	1436.73	0.0017	352	363	0	83.87	36	2e-07	K	VQQLLQDFFNGK	E	Deamidated (NQ)	0.000000000200.0
1	RBR1	NGSrhino	Q Exactive	5	yes	AT3G12580	Symbols: HSP70, ATHSP70 | heat shock protein 70 | chr3:3991487-3993689 REVERSE LENGTH=650	1991	71057	44	21	47.5	650	5322	1	0	0	737.346	1472.68	2	1472.68	-0.0005	40	52	0	61.53	34	2.1e-05	R	TTPSYVAFTDSER	L
1	RBR1	NGSrhino	Q Exactive	5	yes	AT3G12580	Symbols: HSP70, ATHSP70 | heat shock protein 70 | chr3:3991487-3993689 REVERSE LENGTH=650	1991	71057	44	21	47.5	650	6148	1	1	1	791.415	1580.82	2	1580.81	0.004	117	130	0	99.66	35	4.3e-09	K	QFSAEEISSMVLIK	M
1	RBR1	NGSrhino	Q Exactive	5	yes	AT3G12580	Symbols: HSP70, ATHSP70 | heat shock protein 70 | chr3:3991487-3993689 REVERSE LENGTH=650	1991	71057	44	21	47.5	650	6678	1	0	1	825.401	1648.79	2	1648.79	-0.0006	60	74	0	100.89	36	3.7e-09	K	NQVAMNPTNTVFDAK	R
1	RBR1	NGSrhino	Q Exactive	5	yes	AT3G12580	Symbols: HSP70, ATHSP70 | heat shock protein 70 | chr3:3991487-3993689 REVERSE LENGTH=650	1991	71057	44	21	47.5	650	6741	1	0	0	830.453	1658.89	2	1658.89	0.0041	176	191	0	103.17	34	1.4e-09	R	IINEPTAAAIAYGLDK	K
1	RBR1	NGSrhino	Q Exactive	5	yes	AT3G12580	Symbols: HSP70, ATHSP70 | heat shock protein 70 | chr3:3991487-3993689 REVERSE LENGTH=650	1991	71057	44	21	47.5	650	6818	1	0	0	838.37	1674.72	2	1674.72	0.0012	227	242	0	100.01	32	2e-09	K	ATAGDTHLGGEDFDNR	M
1	RBR1	NGSrhino	Q Exactive	5	yes	AT3G12580	Symbols: HSP70, ATHSP70 | heat shock protein 70 | chr3:3991487-3993689 REVERSE LENGTH=650	1991	71057	44	21	47.5	650	6836	1	0	0	840.921	1679.83	2	1679.83	0.0016	145	159	0	78.1	37	7.8e-07	K	NAVVTVPAYFNDSQR	Q
1	RBR1	NGSrhino	Q Exactive	5	yes	AT3G12580	Symbols: HSP70, ATHSP70 | heat shock protein 70 | chr3:3991487-3993689 REVERSE LENGTH=650	1991	71057	44	21	47.5	650	11411	1	0	0	858.764	2573.27	3	2573.26	0.0091	368	393	0	97.66	35	5.9e-09	K	SINPDEAVAYGAAVQAAILSGEGNEK	V
1	RBR1	NGSrhino	Q Exactive	5	yes	AT3G12580	Symbols: HSP70, ATHSP70 | heat shock protein 70 | chr3:3991487-3993689 REVERSE LENGTH=650	1991	71057	44	21	47.5	650	12068	1	1	1	934.133	2799.38	3	2799.37	0.0048	430	453	1	103.6	35	1.7e-09	K	KEQIFSTYSDNQPGVLIQVYEGER	A
1	RBR1	NGSrhino	Q Exactive	5	yes	AT3G12580	Symbols: HSP70, ATHSP70 | heat shock protein 70 | chr3:3991487-3993689 REVERSE LENGTH=650	1991	71057	44	21	47.5	650	12525	1	0	0	975.855	2924.54	3	2924.54	-0.0007	200	226	0	149.85	31	1.6e-14	K	NVLIFDLGGGTFDVSLLTIEEGIFEVK	A
1	RBR1	NGSrhino	Q Exactive	5	yes	AT3G12580	Symbols: HSP70, ATHSP70 | heat shock protein 70 | chr3:3991487-3993689 REVERSE LENGTH=650	1991	71057	44	21	47.5	650	12650	1	1	1	993.126	2976.36	3	2976.35	0.0038	576	601	0	132.06	34	1.8e-12	K	IEDAIDQAIEWLDGNQLAEADEFEDK	M
1	RBR1	NGSrhino	Q Exactive	6	yes	AT5G02490	Symbols: | Heat shock protein 70 (Hsp 70) family protein | chr5:550296-552565 REVERSE LENGTH=653	1803	71342	42	18	42.9	653	52	1	0	0	402.727	803.439	2	803.439	0.0003	507	513	0	48.2	37	0.00094	K	ITITNDK	G
1	RBR1	NGSrhino	Q Exactive	6	yes	AT5G02490	Symbols: | Heat shock protein 70 (Hsp 70) family protein | chr5:550296-552565 REVERSE LENGTH=653	1803	71342	42	18	42.9	653	3127	1	1	1	599.352	1196.69	2	1196.69	0.0019	164	175	0	67.48	30	2.2e-06	K	DAGVIAGLNVLR	I
1	RBR1	NGSrhino	Q Exactive	6	yes	AT5G02490	Symbols: | Heat shock protein 70 (Hsp 70) family protein | chr5:550296-552565 REVERSE LENGTH=653	1803	71342	42	18	42.9	653	3384	1	0	0	614.816	1227.62	2	1227.62	-0.0036	29	39	0	66.7	34	6.7e-06	R	VEIIANDQGNR	T
1	RBR1	NGSrhino	Q Exactive	6	yes	AT5G02490	Symbols: | Heat shock protein 70 (Hsp 70) family protein | chr5:550296-552565 REVERSE LENGTH=653	1803	71342	42	18	42.9	653	3892	1	0	0	639.82	1277.63	2	1277.62	0.0027	243	252	0	71.21	37	4e-06	R	MVNHFVQEFK	R
1	RBR1	NGSrhino	Q Exactive	6	yes	AT5G02490	Symbols: | Heat shock protein 70 (Hsp 70) family protein | chr5:550296-552565 REVERSE LENGTH=653	1803	71342	42	18	42.9	653	3896	1	1	1	639.851	1277.69	2	1277.69	-0.0001	133	144	0	51.97	34	0.0002	R	EIAEAFLGTTVK	N
1	RBR1	NGSrhino	Q Exactive	6	yes	AT5G02490	Symbols: | Heat shock protein 70 (Hsp 70) family protein | chr5:550296-552565 REVERSE LENGTH=653	1803	71342	42	18	42.9	653	4265	1	1	0	666.29	1330.57	2	1330.57	-0.0024	308	317	0	71.03	32	1.4e-06	R	FEEMNMDLFR	K
1	RBR1	NGSrhino	Q Exactive	6	yes	AT5G02490	Symbols: | Heat shock protein 70 (Hsp 70) family protein | chr5:550296-552565 REVERSE LENGTH=653	1803	71342	42	18	42.9	653	4436	1	0	0	680.303	1358.59	2	1358.59	-0.0002	546	556	0	71.4	32	1.4e-06	K	NALENYAYNMR	N	Deamidated (NQ)	0.00000000200.0
1	RBR1	NGSrhino	Q Exactive	6	yes	AT5G02490	Symbols: | Heat shock protein 70 (Hsp 70) family protein | chr5:550296-552565 REVERSE LENGTH=653	1803	71342	42	18	42.9	653	5023	1	0	0	719.373	1436.73	2	1436.73	0.0017	352	363	0	83.87	36	2e-07	K	VQQLLQDFFNGK	E	Deamidated (NQ)	0.000000000200.0
1	RBR1	NGSrhino	Q Exactive	6	yes	AT5G02490	Symbols: | Heat shock protein 70 (Hsp 70) family protein | chr5:550296-552565 REVERSE LENGTH=653	1803	71342	42	18	42.9	653	5322	1	0	0	737.346	1472.68	2	1472.68	-0.0005	40	52	0	61.53	34	2.1e-05	R	TTPSYVAFTDSER	L
1	RBR1	NGSrhino	Q Exactive	6	yes	AT5G02490	Symbols: | Heat shock protein 70 (Hsp 70) family protein | chr5:550296-552565 REVERSE LENGTH=653	1803	71342	42	18	42.9	653	6643	1	0	0	824.413	1646.81	2	1646.81	0.0019	60	74	0	111.33	36	3.6e-10	K	NQVAMNPVNTVFDAK	R
1	RBR1	NGSrhino	Q Exactive	6	yes	AT5G02490	Symbols: | Heat shock protein 70 (Hsp 70) family protein | chr5:550296-552565 REVERSE LENGTH=653	1803	71342	42	18	42.9	653	6741	1	0	0	830.453	1658.89	2	1658.89	0.0041	176	191	0	103.17	34	1.4e-09	R	IINEPTAAAIAYGLDK	K
1	RBR1	NGSrhino	Q Exactive	6	yes	AT5G02490	Symbols: | Heat shock protein 70 (Hsp 70) family protein | chr5:550296-552565 REVERSE LENGTH=653	1803	71342	42	18	42.9	653	6818	1	0	0	838.37	1674.72	2	1674.72	0.0012	227	242	0	100.01	32	2e-09	K	ATAGDTHLGGEDFDNR	M
1	RBR1	NGSrhino	Q Exactive	6	yes	AT5G02490	Symbols: | Heat shock protein 70 (Hsp 70) family protein | chr5:550296-552565 REVERSE LENGTH=653	1803	71342	42	18	42.9	653	6836	1	0	0	840.921	1679.83	2	1679.83	0.0016	145	159	0	78.1	37	7.8e-07	K	NAVVTVPAYFNDSQR	Q
1	RBR1	NGSrhino	Q Exactive	6	yes	AT5G02490	Symbols: | Heat shock protein 70 (Hsp 70) family protein | chr5:550296-552565 REVERSE LENGTH=653	1803	71342	42	18	42.9	653	11411	1	0	0	858.764	2573.27	3	2573.26	0.0091	368	393	0	97.66	35	5.9e-09	K	SINPDEAVAYGAAVQAAILSGEGNEK	V
1	RBR1	NGSrhino	Q Exactive	6	yes	AT5G02490	Symbols: | Heat shock protein 70 (Hsp 70) family protein | chr5:550296-552565 REVERSE LENGTH=653	1803	71342	42	18	42.9	653	12032	1	1	1	924.798	2771.37	3	2770.34	1.0275	430	453	1	77.39	35	6.3e-07	K	KEQVFSTYSDNQPGVLIQVFEGER	A	Deamidated (NQ)	0.000000000002000000000000.0
1	RBR1	NGSrhino	Q Exactive	6	yes	AT5G02490	Symbols: | Heat shock protein 70 (Hsp 70) family protein | chr5:550296-552565 REVERSE LENGTH=653	1803	71342	42	18	42.9	653	12525	1	0	0	975.855	2924.54	3	2924.54	-0.0007	200	226	0	149.85	31	1.6e-14	K	NVLIFDLGGGTFDVSLLTIEEGIFEVK	A
1	RBR1	NGSrhino	Q Exactive	6	yes	AT5G02490	Symbols: | Heat shock protein 70 (Hsp 70) family protein | chr5:550296-552565 REVERSE LENGTH=653	1803	71342	42	18	42.9	653	12814	1	1	1	1022.91	3065.7	3	3065.7	-0.001	394	422	0	120.21	26	4.7e-12	K	VQDLLLLDVTPLSLGLETAGGVMTTLIQR	N
1	RBR1	NGSrhino	Q Exactive	7	yes	AT1G04820	Symbols: TUA4, TOR2 | tubulin alpha-4 chain | chr1:1356421-1358266 REVERSE LENGTH=450	1490	49509	32	14	42.2	450	663	1	1	0	444.221	886.427	2	886.426	0.0014	395	401	0	37.73	33	0.0036	K	FDLMYAK	R
1	RBR1	NGSrhino	Q Exactive	7	yes	AT1G04820	Symbols: TUA4, TOR2 | tubulin alpha-4 chain | chr1:1356421-1358266 REVERSE LENGTH=450	1490	49509	32	14	42.2	450	674	1	1	0	444.737	887.46	2	887.46	0.0003	423	430	0	60.48	35	3.4e-05	R	EDLAALEK	D
1	RBR1	NGSrhino	Q Exactive	7	yes	AT1G04820	Symbols: TUA4, TOR2 | tubulin alpha-4 chain | chr1:1356421-1358266 REVERSE LENGTH=450	1490	49509	32	14	42.2	450	1340	1	1	0	489.755	977.496	2	977.493	0.0028	222	229	0	51.44	37	0.0004	R	PTYTNLNR	L
1	RBR1	NGSrhino	Q Exactive	7	yes	AT1G04820	Symbols: TUA4, TOR2 | tubulin alpha-4 chain | chr1:1356421-1358266 REVERSE LENGTH=450	1490	49509	32	14	42.2	450	1401	1	1	0	494.277	986.539	2	986.54	-0.001	327	336	0	41.15	36	0.0032	K	DVNAAVGTIK	T
1	RBR1	NGSrhino	Q Exactive	7	yes	AT1G04820	Symbols: TUA4, TOR2 | tubulin alpha-4 chain | chr1:1356421-1358266 REVERSE LENGTH=450	1490	49509	32	14	42.2	450	1563	1	1	0	504.231	1006.45	2	1006.45	0.0017	97	105	0	75.88	35	9e-07	K	EDAANNFAR	G
1	RBR1	NGSrhino	Q Exactive	7	yes	AT1G04820	Symbols: TUA4, TOR2 | tubulin alpha-4 chain | chr1:1356421-1358266 REVERSE LENGTH=450	1490	49509	32	14	42.2	450	4730	1	1	0	698.883	1395.75	2	1395.75	0.0004	85	96	0	66.25	34	7e-06	R	QLFHPEQLISGK	E
1	RBR1	NGSrhino	Q Exactive	7	yes	AT1G04820	Symbols: TUA4, TOR2 | tubulin alpha-4 chain | chr1:1356421-1358266 REVERSE LENGTH=450	1490	49509	32	14	42.2	450	5330	1	1	0	737.436	1472.86	2	1472.86	0.0007	230	243	0	79.78	28	7.9e-08	R	LVSQVISSLTASLR	F
1	RBR1	NGSrhino	Q Exactive	7	yes	AT1G04820	Symbols: TUA4, TOR2 | tubulin alpha-4 chain | chr1:1356421-1358266 REVERSE LENGTH=450	1490	49509	32	14	42.2	450	6766	1	1	1	832.442	1662.87	2	1662.87	0.0013	216	229	1	58.24	36	6e-05	R	SLSIERPTYTNLNR	L
1	RBR1	NGSrhino	Q Exactive	7	yes	AT1G04820	Symbols: TUA4, TOR2 | tubulin alpha-4 chain | chr1:1356421-1358266 REVERSE LENGTH=450	1490	49509	32	14	42.2	450	6951	1	1	0	851.457	1700.9	2	1700.9	0.0014	65	79	0	93.11	35	1.6e-08	R	AVFVDLEPTVIDEVR	T
1	RBR1	NGSrhino	Q Exactive	7	yes	AT1G04820	Symbols: TUA4, TOR2 | tubulin alpha-4 chain | chr1:1356421-1358266 REVERSE LENGTH=450	1490	49509	32	14	42.2	450	7422	1	1	0	896.969	1791.92	2	1791.92	0.0011	265	280	0	70.98	35	3e-06	R	IHFMLSSYAPVISAEK	A
1	RBR1	NGSrhino	Q Exactive	7	yes	AT1G04820	Symbols: TUA4, TOR2 | tubulin alpha-4 chain | chr1:1356421-1358266 REVERSE LENGTH=450	1490	49509	32	14	42.2	450	8716	1	1	0	989.444	1976.87	2	1976.88	-0.0013	41	60	0	145.53	34	7.4e-14	K	TVGGGDDAFNTFFSETGAGK	H
1	RBR1	NGSrhino	Q Exactive	7	yes	AT1G04820	Symbols: TUA4, TOR2 | tubulin alpha-4 chain | chr1:1356421-1358266 REVERSE LENGTH=450	1490	49509	32	14	42.2	450	10692	1	1	0	1165.51	2329.01	2	2329.01	-0.0027	403	422	0	122.18	33	1.3e-11	R	AFVHWYVGEGMEEGEFSEAR	E
1	RBR1	NGSrhino	Q Exactive	7	yes	AT1G04820	Symbols: TUA4, TOR2 | tubulin alpha-4 chain | chr1:1356421-1358266 REVERSE LENGTH=450	1490	49509	32	14	42.2	450	10873	1	1	0	1198.1	2394.19	2	2394.19	0.0027	244	264	0	132.48	36	2.5e-12	R	FDGALNVDVTEFQTNLVPYPR	I
1	RBR1	NGSrhino	Q Exactive	7	yes	AT1G04820	Symbols: TUA4, TOR2 | tubulin alpha-4 chain | chr1:1356421-1358266 REVERSE LENGTH=450	1490	49509	32	14	42.2	450	11601	1	1	0	870.417	2608.23	3	2608.23	-0.0014	281	304	0	106.63	35	8.2e-10	K	AFHEQLSVAEITNSAFEPASMMAK	C
1	RBR1	NGSrhino	Q Exactive	8	yes	AT4G14960	Symbols: TUA6 | Tubulin/FtsZ family protein | chr4:8548769-8550319 REVERSE LENGTH=450	1479	49506	31	14	42.2	450	663	1	0	0	444.221	886.427	2	886.426	0.0014	395	401	0	37.73	33	0.0036	K	FDLMYAK	R
1	RBR1	NGSrhino	Q Exactive	8	yes	AT4G14960	Symbols: TUA6 | Tubulin/FtsZ family protein | chr4:8548769-8550319 REVERSE LENGTH=450	1479	49506	31	14	42.2	450	674	1	0	0	444.737	887.46	2	887.46	0.0003	423	430	0	60.48	35	3.4e-05	R	EDLAALEK	D
1	RBR1	NGSrhino	Q Exactive	8	yes	AT4G14960	Symbols: TUA6 | Tubulin/FtsZ family protein | chr4:8548769-8550319 REVERSE LENGTH=450	1479	49506	31	14	42.2	450	1340	1	0	0	489.755	977.496	2	977.493	0.0028	222	229	0	51.44	37	0.0004	R	PTYTNLNR	L
1	RBR1	NGSrhino	Q Exactive	8	yes	AT4G14960	Symbols: TUA6 | Tubulin/FtsZ family protein | chr4:8548769-8550319 REVERSE LENGTH=450	1479	49506	31	14	42.2	450	1401	1	0	0	494.277	986.539	2	986.54	-0.001	327	336	0	41.15	36	0.0032	K	DVNAAVGTIK	T
1	RBR1	NGSrhino	Q Exactive	8	yes	AT4G14960	Symbols: TUA6 | Tubulin/FtsZ family protein | chr4:8548769-8550319 REVERSE LENGTH=450	1479	49506	31	14	42.2	450	1563	1	0	0	504.231	1006.45	2	1006.45	0.0017	97	105	0	75.88	35	9e-07	K	EDAANNFAR	G
1	RBR1	NGSrhino	Q Exactive	8	yes	AT4G14960	Symbols: TUA6 | Tubulin/FtsZ family protein | chr4:8548769-8550319 REVERSE LENGTH=450	1479	49506	31	14	42.2	450	4730	1	0	0	698.883	1395.75	2	1395.75	0.0004	85	96	0	66.25	34	7e-06	R	QLFHPEQLISGK	E
1	RBR1	NGSrhino	Q Exactive	8	yes	AT4G14960	Symbols: TUA6 | Tubulin/FtsZ family protein | chr4:8548769-8550319 REVERSE LENGTH=450	1479	49506	31	14	42.2	450	5330	1	0	0	737.436	1472.86	2	1472.86	0.0007	230	243	0	79.78	28	7.9e-08	R	LVSQVISSLTASLR	F
1	RBR1	NGSrhino	Q Exactive	8	yes	AT4G14960	Symbols: TUA6 | Tubulin/FtsZ family protein | chr4:8548769-8550319 REVERSE LENGTH=450	1479	49506	31	14	42.2	450	6895	1	1	1	845.949	1689.88	2	1689.88	0.0032	216	229	1	54.81	36	0.00014	R	SLNIERPTYTNLNR	L
1	RBR1	NGSrhino	Q Exactive	8	yes	AT4G14960	Symbols: TUA6 | Tubulin/FtsZ family protein | chr4:8548769-8550319 REVERSE LENGTH=450	1479	49506	31	14	42.2	450	6951	1	0	0	851.457	1700.9	2	1700.9	0.0014	65	79	0	93.11	35	1.6e-08	R	AVFVDLEPTVIDEVR	T
1	RBR1	NGSrhino	Q Exactive	8	yes	AT4G14960	Symbols: TUA6 | Tubulin/FtsZ family protein | chr4:8548769-8550319 REVERSE LENGTH=450	1479	49506	31	14	42.2	450	7422	1	0	0	896.969	1791.92	2	1791.92	0.0011	265	280	0	70.98	35	3e-06	R	IHFMLSSYAPVISAEK	A
1	RBR1	NGSrhino	Q Exactive	8	yes	AT4G14960	Symbols: TUA6 | Tubulin/FtsZ family protein | chr4:8548769-8550319 REVERSE LENGTH=450	1479	49506	31	14	42.2	450	8716	1	0	0	989.444	1976.87	2	1976.88	-0.0013	41	60	0	145.53	34	7.4e-14	K	TVGGGDDAFNTFFSETGAGK	H
1	RBR1	NGSrhino	Q Exactive	8	yes	AT4G14960	Symbols: TUA6 | Tubulin/FtsZ family protein | chr4:8548769-8550319 REVERSE LENGTH=450	1479	49506	31	14	42.2	450	10692	1	0	0	1165.51	2329.01	2	2329.01	-0.0027	403	422	0	122.18	33	1.3e-11	R	AFVHWYVGEGMEEGEFSEAR	E
1	RBR1	NGSrhino	Q Exactive	8	yes	AT4G14960	Symbols: TUA6 | Tubulin/FtsZ family protein | chr4:8548769-8550319 REVERSE LENGTH=450	1479	49506	31	14	42.2	450	10873	1	0	0	1198.1	2394.19	2	2394.19	0.0027	244	264	0	132.48	36	2.5e-12	R	FDGALNVDVTEFQTNLVPYPR	I
1	RBR1	NGSrhino	Q Exactive	8	yes	AT4G14960	Symbols: TUA6 | Tubulin/FtsZ family protein | chr4:8548769-8550319 REVERSE LENGTH=450	1479	49506	31	14	42.2	450	11601	1	0	0	870.417	2608.23	3	2608.23	-0.0014	281	304	0	106.63	35	8.2e-10	K	AFHEQLSVAEITNSAFEPASMMAK	C
1	RBR1	NGSrhino	Q Exactive	9	yes	AT3G13920	Symbols: EIF4A1, RH4, TIF4A1 | eukaryotic translation initiation factor 4A1 | chr3:4592635-4594128 REVERSE LENGTH=412	1438	46675	34	17	56.6	412	24	1	1	0	400.224	798.434	2	798.435	-0.0007	62	68	0	52.94	31	7.2e-05	K	PSAIQQR	G
1	RBR1	NGSrhino	Q Exactive	9	yes	AT3G13920	Symbols: EIF4A1, RH4, TIF4A1 | eukaryotic translation initiation factor 4A1 | chr3:4592635-4594128 REVERSE LENGTH=412	1438	46675	34	17	56.6	412	579	1	1	0	438.727	875.44	2	875.439	0.0014	291	297	0	47.92	38	0.001	K	VDWLTDK	M
1	RBR1	NGSrhino	Q Exactive	9	yes	AT3G13920	Symbols: EIF4A1, RH4, TIF4A1 | eukaryotic translation initiation factor 4A1 | chr3:4592635-4594128 REVERSE LENGTH=412	1438	46675	34	17	56.6	412	1027	1	1	0	468.264	934.514	2	934.512	0.0021	129	137	0	58.14	35	5.8e-05	R	ALGDYLGVK	V
1	RBR1	NGSrhino	Q Exactive	9	yes	AT3G13920	Symbols: EIF4A1, RH4, TIF4A1 | eukaryotic translation initiation factor 4A1 | chr3:4592635-4594128 REVERSE LENGTH=412	1438	46675	34	17	56.6	412	1176	1	1	0	479.764	957.514	2	957.513	0.0009	118	125	0	49.98	34	0.00028	R	ELAQQIEK	V
1	RBR1	NGSrhino	Q Exactive	9	yes	AT3G13920	Symbols: EIF4A1, RH4, TIF4A1 | eukaryotic translation initiation factor 4A1 | chr3:4592635-4594128 REVERSE LENGTH=412	1438	46675	34	17	56.6	412	1332	1	1	1	488.783	975.551	2	975.55	0.001	376	384	0	52.47	35	0.00018	K	GVAINFVTR	D
1	RBR1	NGSrhino	Q Exactive	9	yes	AT3G13920	Symbols: EIF4A1, RH4, TIF4A1 | eukaryotic translation initiation factor 4A1 | chr3:4592635-4594128 REVERSE LENGTH=412	1438	46675	34	17	56.6	412	1645	1	1	0	509.277	1016.54	2	1016.54	0.0008	245	253	0	43.22	36	0.0023	R	DELTLEGIK	Q
1	RBR1	NGSrhino	Q Exactive	9	yes	AT3G13920	Symbols: EIF4A1, RH4, TIF4A1 | eukaryotic translation initiation factor 4A1 | chr3:4592635-4594128 REVERSE LENGTH=412	1438	46675	34	17	56.6	412	1869	1	1	0	524.262	1046.51	2	1046.51	0.0024	53	61	0	43.32	37	0.0024	R	GIYAYGFEK	P
1	RBR1	NGSrhino	Q Exactive	9	yes	AT3G13920	Symbols: EIF4A1, RH4, TIF4A1 | eukaryotic translation initiation factor 4A1 | chr3:4592635-4594128 REVERSE LENGTH=412	1438	46675	34	17	56.6	412	2918	1	1	0	587.329	1172.64	2	1172.64	0.0027	244	253	1	72.79	35	2e-06	K	RDELTLEGIK	Q
1	RBR1	NGSrhino	Q Exactive	9	yes	AT3G13920	Symbols: EIF4A1, RH4, TIF4A1 | eukaryotic translation initiation factor 4A1 | chr3:4592635-4594128 REVERSE LENGTH=412	1438	46675	34	17	56.6	412	4370	1	1	1	674.812	1347.61	2	1347.61	0.0035	2	14	0	43.14	34	0.0014	M	AGSAPEGTQFDAR	Q	Acetyl (Protein N-term)	1.0000000000000.0
1	RBR1	NGSrhino	Q Exactive	9	yes	AT3G13920	Symbols: EIF4A1, RH4, TIF4A1 | eukaryotic translation initiation factor 4A1 | chr3:4592635-4594128 REVERSE LENGTH=412	1438	46675	34	17	56.6	412	4766	1	1	0	701.37	1400.73	2	1400.73	-0.0001	76	89	0	89.04	36	5.7e-08	K	GLDVIQQAQSGTGK	T
1	RBR1	NGSrhino	Q Exactive	9	yes	AT3G13920	Symbols: EIF4A1, RH4, TIF4A1 | eukaryotic translation initiation factor 4A1 | chr3:4592635-4594128 REVERSE LENGTH=412	1438	46675	34	17	56.6	412	6017	1	1	0	778.363	1554.71	2	1554.71	0.0059	184	196	0	89.43	35	3.8e-08	K	MFVLDEADEMLSR	G
1	RBR1	NGSrhino	Q Exactive	9	yes	AT3G13920	Symbols: EIF4A1, RH4, TIF4A1 | eukaryotic translation initiation factor 4A1 | chr3:4592635-4594128 REVERSE LENGTH=412	1438	46675	34	17	56.6	412	6239	1	1	0	530.624	1588.85	3	1588.85	-0.0004	200	212	0	83.3	34	1.5e-07	K	DQIYDIFQLLPPK	I
1	RBR1	NGSrhino	Q Exactive	9	yes	AT3G13920	Symbols: EIF4A1, RH4, TIF4A1 | eukaryotic translation initiation factor 4A1 | chr3:4592635-4594128 REVERSE LENGTH=412	1438	46675	34	17	56.6	412	7376	1	1	0	892.882	1783.75	2	1783.75	-0.0055	302	317	0	98.4	32	2.4e-09	R	DHTVSATHGDMDQNTR	D
1	RBR1	NGSrhino	Q Exactive	9	yes	AT3G13920	Symbols: EIF4A1, RH4, TIF4A1 | eukaryotic translation initiation factor 4A1 | chr3:4592635-4594128 REVERSE LENGTH=412	1438	46675	34	17	56.6	412	9228	1	1	0	1030.05	2058.09	2	2058.08	0.0043	213	231	0	114.07	34	1e-10	K	IQVGVFSATMPPEALEITR	K
1	RBR1	NGSrhino	Q Exactive	9	yes	AT3G13920	Symbols: EIF4A1, RH4, TIF4A1 | eukaryotic translation initiation factor 4A1 | chr3:4592635-4594128 REVERSE LENGTH=412	1438	46675	34	17	56.6	412	12477	1	1	0	965.837	2894.49	3	2894.49	-0.0028	341	365	0	69.68	33	2.6e-06	R	GIDVQQVSLVINFDLPTQPENYLHR	I
1	RBR1	NGSrhino	Q Exactive	9	yes	AT3G13920	Symbols: EIF4A1, RH4, TIF4A1 | eukaryotic translation initiation factor 4A1 | chr3:4592635-4594128 REVERSE LENGTH=412	1438	46675	34	17	56.6	412	12699	1	1	1	1008.52	3022.55	3	3022.56	-0.0139	90	117	0	37.27	33	0.004	K	TATFCSGVLQQLDFSLIQCQALVLAPTR	E
1	RBR1	NGSrhino	Q Exactive	9	yes	AT3G13920	Symbols: EIF4A1, RH4, TIF4A1 | eukaryotic translation initiation factor 4A1 | chr3:4592635-4594128 REVERSE LENGTH=412	1438	46675	34	17	56.6	412	13625	1	1	1	1288.27	3861.78	3	3860.74	1.0399	20	52	0	140.31	33	2.2e-13	K	LNEVLEGQDEFFTSYDDVHESFDAMGLQENLLR	G	Deamidated (NQ)	0.020000000000000000000000000000000.0
1	RBR1	NGSrhino	Q Exactive	10	yes	AT5G44340	Symbols: TUB4 | tubulin beta chain 4 | chr5:17859442-17860994 REVERSE LENGTH=444	1392	49791	32	13	42.8	444	1719	1	1	0	514.283	1026.55	2	1026.55	0.001	310	318	0	71.2	33	1.8e-06	R	YLTASAVFR	G
1	RBR1	NGSrhino	Q Exactive	10	yes	AT5G44340	Symbols: TUB4 | tubulin beta chain 4 | chr5:17859442-17860994 REVERSE LENGTH=444	1392	49791	32	13	42.8	444	2079	1	1	0	539.27	1076.52	2	1076.53	-0.0004	155	162	1	42.4	37	0.0029	K	IREEYPDR	M
1	RBR1	NGSrhino	Q Exactive	10	yes	AT5G44340	Symbols: TUB4 | tubulin beta chain 4 | chr5:17859442-17860994 REVERSE LENGTH=444	1392	49791	32	13	42.8	444	2649	1	1	0	570.35	1138.69	2	1138.69	-0.0012	253	262	0	58.43	26	6.2e-06	K	LAVNLIPFPR	L
1	RBR1	NGSrhino	Q Exactive	10	yes	AT5G44340	Symbols: TUB4 | tubulin beta chain 4 | chr5:17859442-17860994 REVERSE LENGTH=444	1392	49791	32	13	42.8	444	2695	1	1	0	573.799	1145.58	2	1145.58	0.0014	242	251	0	68.66	37	7.5e-06	R	FPGQLNSDLR	K
1	RBR1	NGSrhino	Q Exactive	10	yes	AT5G44340	Symbols: TUB4 | tubulin beta chain 4 | chr5:17859442-17860994 REVERSE LENGTH=444	1392	49791	32	13	42.8	444	3283	1	1	0	608.295	1214.58	2	1214.58	-0.0002	381	390	0	62.05	35	2.1e-05	R	VSEQFTAMFR	R
1	RBR1	NGSrhino	Q Exactive	10	yes	AT5G44340	Symbols: TUB4 | tubulin beta chain 4 | chr5:17859442-17860994 REVERSE LENGTH=444	1392	49791	32	13	42.8	444	4056	1	1	1	650.807	1299.6	2	1299.6	0.0019	47	58	0	77.45	34	5.5e-07	R	IDVYFNEASGGK	Y	Deamidated (NQ)	0.000002000000.0
1	RBR1	NGSrhino	Q Exactive	10	yes	AT5G44340	Symbols: TUB4 | tubulin beta chain 4 | chr5:17859442-17860994 REVERSE LENGTH=444	1392	49791	32	13	42.8	444	6417	1	1	0	541.624	1621.85	3	1621.84	0.0057	263	276	0	69.19	35	4.5e-06	R	LHFFMVGFAPLTSR	G
1	RBR1	NGSrhino	Q Exactive	10	yes	AT5G44340	Symbols: TUB4 | tubulin beta chain 4 | chr5:17859442-17860994 REVERSE LENGTH=444	1392	49791	32	13	42.8	444	6640	1	1	0	824.407	1646.8	2	1646.8	-0.0013	63	77	0	76	36	1.1e-06	R	AVLMDLEPGTMDSLR	S
1	RBR1	NGSrhino	Q Exactive	10	yes	AT5G44340	Symbols: TUB4 | tubulin beta chain 4 | chr5:17859442-17860994 REVERSE LENGTH=444	1392	49791	32	13	42.8	444	6934	1	1	0	849.411	1696.81	2	1696.81	-0.0016	337	350	0	88.86	36	6e-08	K	NSSYFVEWIPNNVK	S	Deamidated (NQ)	0.00000000002000.0
1	RBR1	NGSrhino	Q Exactive	10	yes	AT5G44340	Symbols: TUB4 | tubulin beta chain 4 | chr5:17859442-17860994 REVERSE LENGTH=444	1392	49791	32	13	42.8	444	8232	1	1	0	960.455	1918.9	2	1918.89	0.0044	363	379	0	149.08	36	5.7e-14	K	MASTFIGNSTSIQEMFR	R
1	RBR1	NGSrhino	Q Exactive	10	yes	AT5G44340	Symbols: TUB4 | tubulin beta chain 4 | chr5:17859442-17860994 REVERSE LENGTH=444	1392	49791	32	13	42.8	444	8690	1	1	0	658.337	1971.99	3	1971.99	0.0006	104	121	0	125.71	36	1.1e-11	K	GHYTEGAELIDSVLDVVR	K
1	RBR1	NGSrhino	Q Exactive	10	yes	AT5G44340	Symbols: TUB4 | tubulin beta chain 4 | chr5:17859442-17860994 REVERSE LENGTH=444	1392	49791	32	13	42.8	444	10786	1	1	0	1184.07	2366.12	2	2366.12	0.003	277	297	0	109.63	36	4.7e-10	R	GSQQYSALSVPELTQQMWDAK	N
1	RBR1	NGSrhino	Q Exactive	10	yes	AT5G44340	Symbols: TUB4 | tubulin beta chain 4 | chr5:17859442-17860994 REVERSE LENGTH=444	1392	49791	32	13	42.8	444	12985	1	1	1	1066.16	3195.46	3	3195.46	-0.0074	123	154	0	98.36	34	4.2e-09	K	EAENSDCLQGFQVCHSLGGGTGSGMGTLLISK	I
1	RBR1	NGSrhino	Q Exactive	11	yes	AT1G54270	Symbols: EIF4A-2 | eif4a-2 | chr1:20260495-20262018 FORWARD LENGTH=412	1384	46733	32	15	52.4	412	24	1	0	0	400.224	798.434	2	798.435	-0.0007	62	68	0	52.94	31	7.2e-05	K	PSAIQQR	G
1	RBR1	NGSrhino	Q Exactive	11	yes	AT1G54270	Symbols: EIF4A-2 | eif4a-2 | chr1:20260495-20262018 FORWARD LENGTH=412	1384	46733	32	15	52.4	412	579	1	0	0	438.727	875.44	2	875.439	0.0014	291	297	0	47.92	38	0.001	K	VDWLTDK	M
1	RBR1	NGSrhino	Q Exactive	11	yes	AT1G54270	Symbols: EIF4A-2 | eif4a-2 | chr1:20260495-20262018 FORWARD LENGTH=412	1384	46733	32	15	52.4	412	1176	1	0	0	479.764	957.514	2	957.513	0.0009	118	125	0	49.98	34	0.00028	R	ELAQQIEK	V
1	RBR1	NGSrhino	Q Exactive	11	yes	AT1G54270	Symbols: EIF4A-2 | eif4a-2 | chr1:20260495-20262018 FORWARD LENGTH=412	1384	46733	32	15	52.4	412	1645	1	0	0	509.277	1016.54	2	1016.54	0.0008	245	253	0	43.22	36	0.0023	R	DELTLEGIK	Q
1	RBR1	NGSrhino	Q Exactive	11	yes	AT1G54270	Symbols: EIF4A-2 | eif4a-2 | chr1:20260495-20262018 FORWARD LENGTH=412	1384	46733	32	15	52.4	412	1869	1	0	0	524.262	1046.51	2	1046.51	0.0024	53	61	0	43.32	37	0.0024	R	GIYAYGFEK	P
1	RBR1	NGSrhino	Q Exactive	11	yes	AT1G54270	Symbols: EIF4A-2 | eif4a-2 | chr1:20260495-20262018 FORWARD LENGTH=412	1384	46733	32	15	52.4	412	2918	1	0	0	587.329	1172.64	2	1172.64	0.0027	244	253	1	72.79	35	2e-06	K	RDELTLEGIK	Q
1	RBR1	NGSrhino	Q Exactive	11	yes	AT1G54270	Symbols: EIF4A-2 | eif4a-2 | chr1:20260495-20262018 FORWARD LENGTH=412	1384	46733	32	15	52.4	412	4766	1	0	0	701.37	1400.73	2	1400.73	-0.0001	76	89	0	89.04	36	5.7e-08	K	GLDVIQQAQSGTGK	T
1	RBR1	NGSrhino	Q Exactive	11	yes	AT1G54270	Symbols: EIF4A-2 | eif4a-2 | chr1:20260495-20262018 FORWARD LENGTH=412	1384	46733	32	15	52.4	412	6017	1	0	0	778.363	1554.71	2	1554.71	0.0059	184	196	0	89.43	35	3.8e-08	K	MFVLDEADEMLSR	G
1	RBR1	NGSrhino	Q Exactive	11	yes	AT1G54270	Symbols: EIF4A-2 | eif4a-2 | chr1:20260495-20262018 FORWARD LENGTH=412	1384	46733	32	15	52.4	412	6118	1	1	1	788.428	1574.84	2	1574.84	-0.0008	375	388	1	107.07	34	5.9e-10	R	KGVAINFVTLDDQR	M
1	RBR1	NGSrhino	Q Exactive	11	yes	AT1G54270	Symbols: EIF4A-2 | eif4a-2 | chr1:20260495-20262018 FORWARD LENGTH=412	1384	46733	32	15	52.4	412	6239	1	0	0	530.624	1588.85	3	1588.85	-0.0004	200	212	0	83.3	34	1.5e-07	K	DQIYDIFQLLPPK	I
1	RBR1	NGSrhino	Q Exactive	11	yes	AT1G54270	Symbols: EIF4A-2 | eif4a-2 | chr1:20260495-20262018 FORWARD LENGTH=412	1384	46733	32	15	52.4	412	7376	1	0	0	892.882	1783.75	2	1783.75	-0.0055	302	317	0	98.4	32	2.4e-09	R	DHTVSATHGDMDQNTR	D
1	RBR1	NGSrhino	Q Exactive	11	yes	AT1G54270	Symbols: EIF4A-2 | eif4a-2 | chr1:20260495-20262018 FORWARD LENGTH=412	1384	46733	32	15	52.4	412	9228	1	0	0	1030.05	2058.09	2	2058.08	0.0043	213	231	0	114.07	34	1e-10	K	IQVGVFSATMPPEALEITR	K
1	RBR1	NGSrhino	Q Exactive	11	yes	AT1G54270	Symbols: EIF4A-2 | eif4a-2 | chr1:20260495-20262018 FORWARD LENGTH=412	1384	46733	32	15	52.4	412	12477	1	0	0	965.837	2894.49	3	2894.49	-0.0028	341	365	0	69.68	33	2.6e-06	R	GIDVQQVSLVINFDLPTQPENYLHR	I
1	RBR1	NGSrhino	Q Exactive	11	yes	AT1G54270	Symbols: EIF4A-2 | eif4a-2 | chr1:20260495-20262018 FORWARD LENGTH=412	1384	46733	32	15	52.4	412	12699	1	0	1	1008.52	3022.55	3	3022.56	-0.0139	90	117	0	37.27	33	0.004	K	TATFCSGVLQQLDYALLQCQALVLAPTR	E
1	RBR1	NGSrhino	Q Exactive	11	yes	AT1G54270	Symbols: EIF4A-2 | eif4a-2 | chr1:20260495-20262018 FORWARD LENGTH=412	1384	46733	32	15	52.4	412	13624	1	0	1	1288.25	3861.74	3	3860.74	1.0048	20	52	0	137.26	32	3.6e-13	R	LNEVLDGQDEFFTSYDEVHESFDAMGLQENLLR	G	Deamidated (NQ)	0.020000000000000000000000000000000.0
1	RBR1	NGSrhino	Q Exactive	12	yes	AT4G20890	Symbols: TUB9 | tubulin beta-9 chain | chr4:11182218-11183840 FORWARD LENGTH=444	1336	49626	32	13	38.3	444	1719	1	0	0	514.283	1026.55	2	1026.55	0.001	310	318	0	71.2	33	1.8e-06	R	YLTASAVFR	G
1	RBR1	NGSrhino	Q Exactive	12	yes	AT4G20890	Symbols: TUB9 | tubulin beta-9 chain | chr4:11182218-11183840 FORWARD LENGTH=444	1336	49626	32	13	38.3	444	2079	1	0	0	539.27	1076.52	2	1076.53	-0.0004	155	162	1	42.4	37	0.0029	K	IREEYPDR	M
1	RBR1	NGSrhino	Q Exactive	12	yes	AT4G20890	Symbols: TUB9 | tubulin beta-9 chain | chr4:11182218-11183840 FORWARD LENGTH=444	1336	49626	32	13	38.3	444	2649	1	0	0	570.35	1138.69	2	1138.69	-0.0012	253	262	0	58.43	26	6.2e-06	K	LAVNLIPFPR	L
1	RBR1	NGSrhino	Q Exactive	12	yes	AT4G20890	Symbols: TUB9 | tubulin beta-9 chain | chr4:11182218-11183840 FORWARD LENGTH=444	1336	49626	32	13	38.3	444	2695	1	0	0	573.799	1145.58	2	1145.58	0.0014	242	251	0	68.66	37	7.5e-06	R	FPGQLNSDLR	K
1	RBR1	NGSrhino	Q Exactive	12	yes	AT4G20890	Symbols: TUB9 | tubulin beta-9 chain | chr4:11182218-11183840 FORWARD LENGTH=444	1336	49626	32	13	38.3	444	3283	1	0	0	608.295	1214.58	2	1214.58	-0.0002	381	390	0	62.05	35	2.1e-05	R	VSEQFTAMFR	R
1	RBR1	NGSrhino	Q Exactive	12	yes	AT4G20890	Symbols: TUB9 | tubulin beta-9 chain | chr4:11182218-11183840 FORWARD LENGTH=444	1336	49626	32	13	38.3	444	4056	1	0	1	650.807	1299.6	2	1299.6	0.0019	47	58	0	77.45	34	5.5e-07	R	INVYFNEASGGK	Y	2 Deamidated (NQ)	0.020002000000.0
1	RBR1	NGSrhino	Q Exactive	12	yes	AT4G20890	Symbols: TUB9 | tubulin beta-9 chain | chr4:11182218-11183840 FORWARD LENGTH=444	1336	49626	32	13	38.3	444	5272	1	1	1	732.825	1463.64	2	1463.64	-0.0027	325	336	0	60.29	33	2.3e-05	K	EVDEQMMNVQNK	N
1	RBR1	NGSrhino	Q Exactive	12	yes	AT4G20890	Symbols: TUB9 | tubulin beta-9 chain | chr4:11182218-11183840 FORWARD LENGTH=444	1336	49626	32	13	38.3	444	6417	1	0	0	541.624	1621.85	3	1621.84	0.0057	263	276	0	69.19	35	4.5e-06	R	LHFFMVGFAPLTSR	G
1	RBR1	NGSrhino	Q Exactive	12	yes	AT4G20890	Symbols: TUB9 | tubulin beta-9 chain | chr4:11182218-11183840 FORWARD LENGTH=444	1336	49626	32	13	38.3	444	6640	1	0	0	824.407	1646.8	2	1646.8	-0.0013	63	77	0	76	36	1.1e-06	R	AVLMDLEPGTMDSLR	S
1	RBR1	NGSrhino	Q Exactive	12	yes	AT4G20890	Symbols: TUB9 | tubulin beta-9 chain | chr4:11182218-11183840 FORWARD LENGTH=444	1336	49626	32	13	38.3	444	6934	1	0	0	849.411	1696.81	2	1696.81	-0.0016	337	350	0	88.86	36	6e-08	K	NSSYFVEWIPNNVK	S	Deamidated (NQ)	0.00000000002000.0
1	RBR1	NGSrhino	Q Exactive	12	yes	AT4G20890	Symbols: TUB9 | tubulin beta-9 chain | chr4:11182218-11183840 FORWARD LENGTH=444	1336	49626	32	13	38.3	444	8232	1	0	0	960.455	1918.9	2	1918.89	0.0044	363	379	0	149.08	36	5.7e-14	K	MASTFIGNSTSIQEMFR	R
1	RBR1	NGSrhino	Q Exactive	12	yes	AT4G20890	Symbols: TUB9 | tubulin beta-9 chain | chr4:11182218-11183840 FORWARD LENGTH=444	1336	49626	32	13	38.3	444	8690	1	0	0	658.337	1971.99	3	1971.99	0.0006	104	121	0	125.71	36	1.1e-11	K	GHYTEGAELIDSVLDVVR	K
1	RBR1	NGSrhino	Q Exactive	12	yes	AT4G20890	Symbols: TUB9 | tubulin beta-9 chain | chr4:11182218-11183840 FORWARD LENGTH=444	1336	49626	32	13	38.3	444	10786	1	0	0	1184.07	2366.12	2	2366.12	0.003	277	297	0	109.63	36	4.7e-10	R	GSQQYSALSVPELTQQMWDAK	N
1	RBR1	NGSrhino	Q Exactive	13	yes	AT5G62690	Symbols: TUB2 | tubulin beta chain 2 | chr5:25181560-25183501 FORWARD LENGTH=450	1221	50701	31	14	38.9	450	1948	1	1	0	530.269	1058.52	2	1058.52	0.0016	310	318	0	55.79	35	9.9e-05	R	YLTASAMFR	G
1	RBR1	NGSrhino	Q Exactive	13	yes	AT5G62690	Symbols: TUB2 | tubulin beta chain 2 | chr5:25181560-25183501 FORWARD LENGTH=450	1221	50701	31	14	38.9	450	2079	1	0	0	539.27	1076.52	2	1076.53	-0.0004	155	162	1	42.4	37	0.0029	K	IREEYPDR	M
1	RBR1	NGSrhino	Q Exactive	13	yes	AT5G62690	Symbols: TUB2 | tubulin beta chain 2 | chr5:25181560-25183501 FORWARD LENGTH=450	1221	50701	31	14	38.9	450	2649	1	0	0	570.35	1138.69	2	1138.69	-0.0012	253	262	0	58.43	26	6.2e-06	K	LAVNLIPFPR	L
1	RBR1	NGSrhino	Q Exactive	13	yes	AT5G62690	Symbols: TUB2 | tubulin beta chain 2 | chr5:25181560-25183501 FORWARD LENGTH=450	1221	50701	31	14	38.9	450	2695	1	0	0	573.799	1145.58	2	1145.58	0.0014	242	251	0	68.66	37	7.5e-06	R	FPGQLNSDLR	K
1	RBR1	NGSrhino	Q Exactive	13	yes	AT5G62690	Symbols: TUB2 | tubulin beta chain 2 | chr5:25181560-25183501 FORWARD LENGTH=450	1221	50701	31	14	38.9	450	3283	1	0	0	608.295	1214.58	2	1214.58	-0.0002	381	390	0	62.05	35	2.1e-05	R	VSEQFTAMFR	R
1	RBR1	NGSrhino	Q Exactive	13	yes	AT5G62690	Symbols: TUB2 | tubulin beta chain 2 | chr5:25181560-25183501 FORWARD LENGTH=450	1221	50701	31	14	38.9	450	4029	1	1	1	648.808	1295.6	2	1295.6	0.0012	36	46	0	92.28	35	2.3e-08	R	YTGDSDLQLER	I
1	RBR1	NGSrhino	Q Exactive	13	yes	AT5G62690	Symbols: TUB2 | tubulin beta chain 2 | chr5:25181560-25183501 FORWARD LENGTH=450	1221	50701	31	14	38.9	450	4617	1	1	0	692.856	1383.7	2	1383.69	0.0042	163	174	0	56.34	36	9.3e-05	R	MMLTFSVFPSPK	V
1	RBR1	NGSrhino	Q Exactive	13	yes	AT5G62690	Symbols: TUB2 | tubulin beta chain 2 | chr5:25181560-25183501 FORWARD LENGTH=450	1221	50701	31	14	38.9	450	5113	1	1	0	723.85	1445.69	2	1445.68	0.0031	325	336	0	47.78	35	0.00061	K	EVDEQMLNVQNK	N
1	RBR1	NGSrhino	Q Exactive	13	yes	AT5G62690	Symbols: TUB2 | tubulin beta chain 2 | chr5:25181560-25183501 FORWARD LENGTH=450	1221	50701	31	14	38.9	450	6417	1	0	0	541.624	1621.85	3	1621.84	0.0057	263	276	0	69.19	35	4.5e-06	R	LHFFMVGFAPLTSR	G
1	RBR1	NGSrhino	Q Exactive	13	yes	AT5G62690	Symbols: TUB2 | tubulin beta chain 2 | chr5:25181560-25183501 FORWARD LENGTH=450	1221	50701	31	14	38.9	450	6640	1	0	0	824.407	1646.8	2	1646.8	-0.0013	63	77	0	76	36	1.1e-06	R	AVLMDLEPGTMDSLR	S
1	RBR1	NGSrhino	Q Exactive	13	yes	AT5G62690	Symbols: TUB2 | tubulin beta chain 2 | chr5:25181560-25183501 FORWARD LENGTH=450	1221	50701	31	14	38.9	450	6934	1	0	0	849.411	1696.81	2	1696.81	-0.0016	337	350	0	88.86	36	6e-08	K	NSSYFVEWIPNNVK	S	Deamidated (NQ)	0.00000000002000.0
1	RBR1	NGSrhino	Q Exactive	13	yes	AT5G62690	Symbols: TUB2 | tubulin beta chain 2 | chr5:25181560-25183501 FORWARD LENGTH=450	1221	50701	31	14	38.9	450	7279	1	1	1	881.937	1761.86	2	1761.86	-0.0012	283	297	0	72.43	37	3e-06	R	SLTVPELTQQMWDSK	N
1	RBR1	NGSrhino	Q Exactive	13	yes	AT5G62690	Symbols: TUB2 | tubulin beta chain 2 | chr5:25181560-25183501 FORWARD LENGTH=450	1221	50701	31	14	38.9	450	8232	1	0	0	960.455	1918.9	2	1918.89	0.0044	363	379	0	149.08	36	5.7e-14	K	MASTFIGNSTSIQEMFR	R
1	RBR1	NGSrhino	Q Exactive	13	yes	AT5G62690	Symbols: TUB2 | tubulin beta chain 2 | chr5:25181560-25183501 FORWARD LENGTH=450	1221	50701	31	14	38.9	450	8690	1	0	0	658.337	1971.99	3	1971.99	0.0006	104	121	0	125.71	36	1.1e-11	K	GHYTEGAELIDSVLDVVR	K
1	RBR1	NGSrhino	Q Exactive	14	yes	AT1G36180	Symbols: ACC2 | acetyl-CoA carboxylase 2 | chr1:13546047-13558339 FORWARD LENGTH=2355	1208	262563	25	23	16.9	2355	1022	1	1	0	468.253	934.492	2	934.491	0.0005	1965	1972	0	40.98	37	0.0042	K	WLGGIFDK	N
1	RBR1	NGSrhino	Q Exactive	14	yes	AT1G36180	Symbols: ACC2 | acetyl-CoA carboxylase 2 | chr1:13546047-13558339 FORWARD LENGTH=2355	1208	262563	25	23	16.9	2355	1168	1	1	1	478.793	955.571	2	955.57	0.0009	866	875	0	42.81	31	0.00067	R	LGLPTAISGK	V
1	RBR1	NGSrhino	Q Exactive	14	yes	AT1G36180	Symbols: ACC2 | acetyl-CoA carboxylase 2 | chr1:13546047-13558339 FORWARD LENGTH=2355	1208	262563	25	23	16.9	2355	1634	1	1	1	508.78	1015.55	2	1015.55	0.0009	1173	1180	0	48.99	36	0.00061	R	VVETYIHR	L
1	RBR1	NGSrhino	Q Exactive	14	yes	AT1G36180	Symbols: ACC2 | acetyl-CoA carboxylase 2 | chr1:13546047-13558339 FORWARD LENGTH=2355	1208	262563	25	23	16.9	2355	2255	1	1	1	550.784	1099.55	2	1099.55	0.0024	845	854	0	35.52	34	0.0084	K	LDLDDPSAVR	K
1	RBR1	NGSrhino	Q Exactive	14	yes	AT1G36180	Symbols: ACC2 | acetyl-CoA carboxylase 2 | chr1:13546047-13558339 FORWARD LENGTH=2355	1208	262563	25	23	16.9	2355	2693	1	1	0	573.795	1145.57	2	1145.58	-0.0003	738	748	0	59.4	36	5.5e-05	R	DGGLLMQLDGK	S
1	RBR1	NGSrhino	Q Exactive	14	yes	AT1G36180	Symbols: ACC2 | acetyl-CoA carboxylase 2 | chr1:13546047-13558339 FORWARD LENGTH=2355	1208	262563	25	23	16.9	2355	3827	1	1	1	639.354	1276.69	2	1276.69	0.0021	293	303	0	37.54	35	0.0057	R	SLVTVPEEIYK	K
1	RBR1	NGSrhino	Q Exactive	14	yes	AT1G36180	Symbols: ACC2 | acetyl-CoA carboxylase 2 | chr1:13546047-13558339 FORWARD LENGTH=2355	1208	262563	25	23	16.9	2355	4961	1	1	1	714.873	1427.73	2	1427.73	-0.001	2130	2142	0	50.06	35	0.00037	R	GNVLEPEGMIEIK	F
1	RBR1	NGSrhino	Q Exactive	14	yes	AT1G36180	Symbols: ACC2 | acetyl-CoA carboxylase 2 | chr1:13546047-13558339 FORWARD LENGTH=2355	1208	262563	25	23	16.9	2355	5616	1	1	1	750.422	1498.83	2	1498.83	-0.001	2051	2062	0	57.35	32	3.6e-05	R	EQLPLFIIANWR	G
1	RBR1	NGSrhino	Q Exactive	14	yes	AT1G36180	Symbols: ACC2 | acetyl-CoA carboxylase 2 | chr1:13546047-13558339 FORWARD LENGTH=2355	1208	262563	25	23	16.9	2355	6104	1	1	1	524.649	1570.92	3	1570.92	0.0046	1044	1057	0	57.73	25	6.7e-06	K	IVDIVLSHQGIIHK	N
1	RBR1	NGSrhino	Q Exactive	14	yes	AT1G36180	Symbols: ACC2 | acetyl-CoA carboxylase 2 | chr1:13546047-13558339 FORWARD LENGTH=2355	1208	262563	25	23	16.9	2355	7151	1	1	1	869.486	1736.96	2	1736.96	0.002	403	418	0	83.02	31	6.3e-08	K	IIEEGPITVAPQETIK	K
1	RBR1	NGSrhino	Q Exactive	14	yes	AT1G36180	Symbols: ACC2 | acetyl-CoA carboxylase 2 | chr1:13546047-13558339 FORWARD LENGTH=2355	1208	262563	25	23	16.9	2355	7616	1	1	1	907.99	1813.96	2	1813.96	0.0003	247	264	0	36.7	34	0.0058	K	GIIFLGPPADSMIALGDK	I
1	RBR1	NGSrhino	Q Exactive	14	yes	AT1G36180	Symbols: ACC2 | acetyl-CoA carboxylase 2 | chr1:13546047-13558339 FORWARD LENGTH=2355	1208	262563	25	23	16.9	2355	8130	1	1	0	632.645	1894.91	3	1894.91	0.0065	616	631	0	85.08	37	1.6e-07	R	TNVDYTIDLLHASDYR	E
1	RBR1	NGSrhino	Q Exactive	14	yes	AT1G36180	Symbols: ACC2 | acetyl-CoA carboxylase 2 | chr1:13546047-13558339 FORWARD LENGTH=2355	1208	262563	25	23	16.9	2355	8361	1	1	1	973.024	1944.03	2	1944.03	0.0016	2070	2087	0	119.46	34	3.2e-11	R	DLFEGILQAGSAIVENLR	T
1	RBR1	NGSrhino	Q Exactive	14	yes	AT1G36180	Symbols: ACC2 | acetyl-CoA carboxylase 2 | chr1:13546047-13558339 FORWARD LENGTH=2355	1208	262563	25	23	16.9	2355	9405	1	1	1	699.015	2094.02	3	2094.03	-0.0026	511	529	1	59.78	36	4.9e-05	K	TSVVASPFDFDEAESLRPK	G
1	RBR1	NGSrhino	Q Exactive	14	yes	AT1G36180	Symbols: ACC2 | acetyl-CoA carboxylase 2 | chr1:13546047-13558339 FORWARD LENGTH=2355	1208	262563	25	23	16.9	2355	10711	1	1	0	778.757	2333.25	3	2333.24	0.0109	265	287	0	73.34	31	7e-07	K	IGSSLIAQAADVPTLPWSGSHVK	I
1	RBR1	NGSrhino	Q Exactive	14	yes	AT1G36180	Symbols: ACC2 | acetyl-CoA carboxylase 2 | chr1:13546047-13558339 FORWARD LENGTH=2355	1208	262563	25	23	16.9	2355	10857	1	1	1	796.728	2387.16	3	2387.15	0.008	223	244	0	75.44	36	1.2e-06	R	VDAVWPGWGHASENPELPDALK	E
1	RBR1	NGSrhino	Q Exactive	14	yes	AT1G36180	Symbols: ACC2 | acetyl-CoA carboxylase 2 | chr1:13546047-13558339 FORWARD LENGTH=2355	1208	262563	25	23	16.9	2355	11260	1	1	1	842.736	2525.19	3	2525.18	0.0044	537	559	1	69.74	35	4.1e-06	R	VTSEDPDDGFKPTSGEIQELSFK	S
1	RBR1	NGSrhino	Q Exactive	14	yes	AT1G36180	Symbols: ACC2 | acetyl-CoA carboxylase 2 | chr1:13546047-13558339 FORWARD LENGTH=2355	1208	262563	25	23	16.9	2355	12302	1	1	0	949.856	2846.55	3	2846.55	-0.0026	2311	2337	0	67.05	29	1.7e-06	K	LLNQLAEIGNSSDLQALPQGLANLLNK	V
1	RBR1	NGSrhino	Q Exactive	14	yes	AT1G36180	Symbols: ACC2 | acetyl-CoA carboxylase 2 | chr1:13546047-13558339 FORWARD LENGTH=2355	1208	262563	25	23	16.9	2355	12547	1	1	1	978.125	2931.35	3	2931.36	-0.0089	1492	1516	0	104.4	35	1.3e-09	R	FEVNAEDEETTVETILEEATQEIHR	S
1	RBR1	NGSrhino	Q Exactive	14	yes	AT1G36180	Symbols: ACC2 | acetyl-CoA carboxylase 2 | chr1:13546047-13558339 FORWARD LENGTH=2355	1208	262563	25	23	16.9	2355	12843	1	1	1	772.876	3087.48	4	3087.46	0.0132	1491	1516	1	99.56	34	3.4e-09	R	RFEVNAEDEETTVETILEEATQEIHR	S
1	RBR1	NGSrhino	Q Exactive	14	yes	AT1G36180	Symbols: ACC2 | acetyl-CoA carboxylase 2 | chr1:13546047-13558339 FORWARD LENGTH=2355	1208	262563	25	23	16.9	2355	13158	1	1	1	834.689	3334.73	4	3334.73	-0.0063	1993	2024	0	55.41	31	4.5e-05	K	LGGIPIGVVAVETQTVMHVIPADPGQLDSHER	V
1	RBR1	NGSrhino	Q Exactive	14	yes	AT1G36180	Symbols: ACC2 | acetyl-CoA carboxylase 2 | chr1:13546047-13558339 FORWARD LENGTH=2355	1208	262563	25	23	16.9	2355	13163	1	1	1	1113.23	3336.66	3	3336.66	-0.0023	1005	1032	0	120.16	34	2.6e-11	R	LIVHSLFEEYLSVEELFNDNMLADVIER	M
1	RBR1	NGSrhino	Q Exactive	14	yes	AT1G36180	Symbols: ACC2 | acetyl-CoA carboxylase 2 | chr1:13546047-13558339 FORWARD LENGTH=2355	1208	262563	25	23	16.9	2355	13481	1	1	1	1224.6	3670.77	3	3670.78	-0.0042	1138	1171	0	144.57	34	8.9e-14	K	SAISETMENLVSSSLAVEDALVGLFDHSDHTLQR	R
1	RBR1	NGSrhino	Q Exactive	15	yes	AT2G29550	Symbols: TUB7 | tubulin beta-7 chain | chr2:12644258-12645932 REVERSE LENGTH=449	1200	50714	30	13	37.4	449	1948	1	0	0	530.269	1058.52	2	1058.52	0.0016	310	318	0	55.79	35	9.9e-05	R	YLTASAMFR	G
1	RBR1	NGSrhino	Q Exactive	15	yes	AT2G29550	Symbols: TUB7 | tubulin beta-7 chain | chr2:12644258-12645932 REVERSE LENGTH=449	1200	50714	30	13	37.4	449	2079	1	0	0	539.27	1076.52	2	1076.53	-0.0004	155	162	1	42.4	37	0.0029	K	IREEYPDR	M
1	RBR1	NGSrhino	Q Exactive	15	yes	AT2G29550	Symbols: TUB7 | tubulin beta-7 chain | chr2:12644258-12645932 REVERSE LENGTH=449	1200	50714	30	13	37.4	449	2649	1	0	0	570.35	1138.69	2	1138.69	-0.0012	253	262	0	58.43	26	6.2e-06	K	LAVNLIPFPR	L
1	RBR1	NGSrhino	Q Exactive	15	yes	AT2G29550	Symbols: TUB7 | tubulin beta-7 chain | chr2:12644258-12645932 REVERSE LENGTH=449	1200	50714	30	13	37.4	449	2695	1	0	0	573.799	1145.58	2	1145.58	0.0014	242	251	0	68.66	37	7.5e-06	R	FPGQLNSDLR	K
1	RBR1	NGSrhino	Q Exactive	15	yes	AT2G29550	Symbols: TUB7 | tubulin beta-7 chain | chr2:12644258-12645932 REVERSE LENGTH=449	1200	50714	30	13	37.4	449	3283	1	0	0	608.295	1214.58	2	1214.58	-0.0002	381	390	0	62.05	35	2.1e-05	R	VSEQFTAMFR	R
1	RBR1	NGSrhino	Q Exactive	15	yes	AT2G29550	Symbols: TUB7 | tubulin beta-7 chain | chr2:12644258-12645932 REVERSE LENGTH=449	1200	50714	30	13	37.4	449	5113	1	0	0	723.85	1445.69	2	1445.68	0.0031	325	336	0	47.78	35	0.00061	K	EVDEQMLNVQNK	N
1	RBR1	NGSrhino	Q Exactive	15	yes	AT2G29550	Symbols: TUB7 | tubulin beta-7 chain | chr2:12644258-12645932 REVERSE LENGTH=449	1200	50714	30	13	37.4	449	6417	1	0	0	541.624	1621.85	3	1621.84	0.0057	263	276	0	69.19	35	4.5e-06	R	LHFFMVGFAPLTSR	G
1	RBR1	NGSrhino	Q Exactive	15	yes	AT2G29550	Symbols: TUB7 | tubulin beta-7 chain | chr2:12644258-12645932 REVERSE LENGTH=449	1200	50714	30	13	37.4	449	6458	1	1	0	817.4	1632.79	2	1632.79	0.0007	63	77	0	77.6	36	8.3e-07	R	AVLMDLEPGTMDSVR	S
1	RBR1	NGSrhino	Q Exactive	15	yes	AT2G29550	Symbols: TUB7 | tubulin beta-7 chain | chr2:12644258-12645932 REVERSE LENGTH=449	1200	50714	30	13	37.4	449	6934	1	0	0	849.411	1696.81	2	1696.81	-0.0016	337	350	0	88.86	36	6e-08	K	NSSYFVEWIPNNVK	S	Deamidated (NQ)	0.00000000002000.0
1	RBR1	NGSrhino	Q Exactive	15	yes	AT2G29550	Symbols: TUB7 | tubulin beta-7 chain | chr2:12644258-12645932 REVERSE LENGTH=449	1200	50714	30	13	37.4	449	7325	1	1	1	887.446	1772.88	2	1772.88	0.0004	283	297	0	63.33	36	2.2e-05	R	NLTVPELTQQMWDAK	N
1	RBR1	NGSrhino	Q Exactive	15	yes	AT2G29550	Symbols: TUB7 | tubulin beta-7 chain | chr2:12644258-12645932 REVERSE LENGTH=449	1200	50714	30	13	37.4	449	8139	1	1	1	950.473	1898.93	2	1898.93	0.004	20	35	0	97.95	36	6.7e-09	K	FWEVVNLEHGIDQTGR	Y
1	RBR1	NGSrhino	Q Exactive	15	yes	AT2G29550	Symbols: TUB7 | tubulin beta-7 chain | chr2:12644258-12645932 REVERSE LENGTH=449	1200	50714	30	13	37.4	449	8232	1	0	0	960.455	1918.9	2	1918.89	0.0044	363	379	0	149.08	36	5.7e-14	K	MASTFIGNSTSIQEMFR	R
1	RBR1	NGSrhino	Q Exactive	15	yes	AT2G29550	Symbols: TUB7 | tubulin beta-7 chain | chr2:12644258-12645932 REVERSE LENGTH=449	1200	50714	30	13	37.4	449	8690	1	0	0	658.337	1971.99	3	1971.99	0.0006	104	121	0	125.71	36	1.1e-11	K	GHYTEGAELIDSVLDVVR	K
1	RBR1	NGSrhino	Q Exactive	16	no	AT5G03415	Symbols: DPB, ATDPB | Transcription factor DP | chr5:842842-845200 FORWARD LENGTH=385	1163	42729	22	8	36.6	385	2602	1	1	1	567.799	1133.58	2	1133.58	0.0012	186	195	0	58.22	37	7.9e-05	R	TSLSDIEELK	N
1	RBR1	NGSrhino	Q Exactive	16	no	AT5G03415	Symbols: DPB, ATDPB | Transcription factor DP | chr5:842842-845200 FORWARD LENGTH=385	1163	42729	22	8	36.6	385	5921	1	1	1	767.885	1533.76	2	1533.75	0.0038	186	198	1	84.84	37	1.9e-07	R	TSLSDIEELKNER	L	Deamidated (NQ)	0.0000000000200.0
1	RBR1	NGSrhino	Q Exactive	16	no	AT5G03415	Symbols: DPB, ATDPB | Transcription factor DP | chr5:842842-845200 FORWARD LENGTH=385	1163	42729	22	8	36.6	385	6889	1	1	1	845.398	1688.78	2	1688.77	0.0061	370	385	1	61.85	35	2.5e-05	K	SPSLPGIMNSSMKPEN	-	Deamidated (NQ)	0.0000000020000000.0
1	RBR1	NGSrhino	Q Exactive	16	no	AT5G03415	Symbols: DPB, ATDPB | Transcription factor DP | chr5:842842-845200 FORWARD LENGTH=385	1163	42729	22	8	36.6	385	7448	1	1	1	898.471	1794.93	2	1794.93	0.0023	158	173	0	102.61	35	2.1e-09	R	VYDALNVLMAMDIISK	D
1	RBR1	NGSrhino	Q Exactive	16	no	AT5G03415	Symbols: DPB, ATDPB | Transcription factor DP | chr5:842842-845200 FORWARD LENGTH=385	1163	42729	22	8	36.6	385	8440	1	1	1	979.975	1957.94	2	1957.93	0.0018	67	86	0	123.82	36	1.9e-11	R	LNNLDIQGDDAGSQGASGVK	K
1	RBR1	NGSrhino	Q Exactive	16	no	AT5G03415	Symbols: DPB, ATDPB | Transcription factor DP | chr5:842842-845200 FORWARD LENGTH=385	1163	42729	22	8	36.6	385	10843	1	1	1	1191.6	2381.19	2	2381.19	0.0014	209	228	0	149.06	35	4.6e-14	K	TAYSQELEEQYVGLQNLIQR	N
1	RBR1	NGSrhino	Q Exactive	16	no	AT5G03415	Symbols: DPB, ATDPB | Transcription factor DP | chr5:842842-845200 FORWARD LENGTH=385	1163	42729	22	8	36.6	385	11652	1	1	1	883.376	2647.11	3	2647.11	-0.0027	2	25	0	83.97	30	4.2e-08	M	TTTGSNSNHNHHESNNNNNNPSTR	S
1	RBR1	NGSrhino	Q Exactive	16	no	AT5G03415	Symbols: DPB, ATDPB | Transcription factor DP | chr5:842842-845200 FORWARD LENGTH=385	1163	42729	22	8	36.6	385	13449	1	1	1	1201.88	3602.62	3	3601.59	1.0371	121	152	0	100	33	2.5e-09	R	TTYNEVADELVAEFALPNNDGTSPDQQQYDEK	N	Deamidated (NQ)	0.00000000000000000200000000000000.0
1	RBR1	NGSrhino	Q Exactive	17	yes	AT5G19770	Symbols: TUA3 | tubulin alpha-3 | chr5:6682761-6684474 REVERSE LENGTH=450	1027	49622	24	11	31.1	450	663	1	0	0	444.221	886.427	2	886.426	0.0014	395	401	0	37.73	33	0.0036	K	FDLMYAK	R
1	RBR1	NGSrhino	Q Exactive	17	yes	AT5G19770	Symbols: TUA3 | tubulin alpha-3 | chr5:6682761-6684474 REVERSE LENGTH=450	1027	49622	24	11	31.1	450	674	1	0	0	444.737	887.46	2	887.46	0.0003	423	430	0	60.48	35	3.4e-05	R	EDLAALEK	D
1	RBR1	NGSrhino	Q Exactive	17	yes	AT5G19770	Symbols: TUA3 | tubulin alpha-3 | chr5:6682761-6684474 REVERSE LENGTH=450	1027	49622	24	11	31.1	450	1340	1	0	0	489.755	977.496	2	977.493	0.0028	222	229	0	51.44	37	0.0004	R	PTYTNLNR	L
1	RBR1	NGSrhino	Q Exactive	17	yes	AT5G19770	Symbols: TUA3 | tubulin alpha-3 | chr5:6682761-6684474 REVERSE LENGTH=450	1027	49622	24	11	31.1	450	1401	1	0	0	494.277	986.539	2	986.54	-0.001	327	336	0	41.15	36	0.0032	K	DVNAAVGTIK	T
1	RBR1	NGSrhino	Q Exactive	17	yes	AT5G19770	Symbols: TUA3 | tubulin alpha-3 | chr5:6682761-6684474 REVERSE LENGTH=450	1027	49622	24	11	31.1	450	1563	1	0	0	504.231	1006.45	2	1006.45	0.0017	97	105	0	75.88	35	9e-07	K	EDAANNFAR	G
1	RBR1	NGSrhino	Q Exactive	17	yes	AT5G19770	Symbols: TUA3 | tubulin alpha-3 | chr5:6682761-6684474 REVERSE LENGTH=450	1027	49622	24	11	31.1	450	4730	1	0	0	698.883	1395.75	2	1395.75	0.0004	85	96	0	66.25	34	7e-06	R	QLFHPEQLISGK	E
1	RBR1	NGSrhino	Q Exactive	17	yes	AT5G19770	Symbols: TUA3 | tubulin alpha-3 | chr5:6682761-6684474 REVERSE LENGTH=450	1027	49622	24	11	31.1	450	5902	1	1	1	766.456	1530.9	2	1530.9	-0.0002	230	243	0	79.02	26	6e-08	R	LISQIISSLTTSLR	F
1	RBR1	NGSrhino	Q Exactive	17	yes	AT5G19770	Symbols: TUA3 | tubulin alpha-3 | chr5:6682761-6684474 REVERSE LENGTH=450	1027	49622	24	11	31.1	450	6951	1	0	0	851.457	1700.9	2	1700.9	0.0014	65	79	0	93.11	35	1.6e-08	R	AVFVDLEPTVIDEVR	T
1	RBR1	NGSrhino	Q Exactive	17	yes	AT5G19770	Symbols: TUA3 | tubulin alpha-3 | chr5:6682761-6684474 REVERSE LENGTH=450	1027	49622	24	11	31.1	450	7123	1	1	1	578.98	1733.92	3	1733.92	0.0006	265	280	0	83.22	35	1.6e-07	R	IHFMLSSYAPVISAAK	A
1	RBR1	NGSrhino	Q Exactive	17	yes	AT5G19770	Symbols: TUA3 | tubulin alpha-3 | chr5:6682761-6684474 REVERSE LENGTH=450	1027	49622	24	11	31.1	450	10692	1	0	0	1165.51	2329.01	2	2329.01	-0.0027	403	422	0	122.18	33	1.3e-11	R	AFVHWYVGEGMEEGEFSEAR	E
1	RBR1	NGSrhino	Q Exactive	17	yes	AT5G19770	Symbols: TUA3 | tubulin alpha-3 | chr5:6682761-6684474 REVERSE LENGTH=450	1027	49622	24	11	31.1	450	10923	1	1	1	1206.11	2410.21	2	2409.19	1.026	244	264	0	46.73	36	0.00087	R	FDGAINVDITEFQTNLVPYPR	I	Deamidated (NQ)	0.000002000000000000000.0
1	RBR1	NGSrhino	Q Exactive	18	no	AT1G47870	Symbols: E2FC, ATE2F2, ATE2FC | winged-helix DNA-binding transcription factor family protein | chr1:17634937-17637557 FORWARD LENGTH=396	954	44460	18	13	40.2	396	793	1	1	1	452.231	902.447	2	902.446	0.001	228	235	0	41.89	35	0.0025	K	DLGDQISR	L
1	RBR1	NGSrhino	Q Exactive	18	no	AT1G47870	Symbols: E2FC, ATE2F2, ATE2FC | winged-helix DNA-binding transcription factor family protein | chr1:17634937-17637557 FORWARD LENGTH=396	954	44460	18	13	40.2	396	1440	1	1	1	496.268	990.522	2	990.523	-0.0018	366	374	0	54.53	37	0.00019	K	IVTSDTDLK	A
1	RBR1	NGSrhino	Q Exactive	18	no	AT1G47870	Symbols: E2FC, ATE2F2, ATE2FC | winged-helix DNA-binding transcription factor family protein | chr1:17634937-17637557 FORWARD LENGTH=396	954	44460	18	13	40.2	396	1629	1	1	1	508.754	1015.49	2	1015.49	-0.0001	110	118	0	57.61	34	4.8e-05	K	QESSPQNVK	R
1	RBR1	NGSrhino	Q Exactive	18	no	AT1G47870	Symbols: E2FC, ATE2F2, ATE2FC | winged-helix DNA-binding transcription factor family protein | chr1:17634937-17637557 FORWARD LENGTH=396	954	44460	18	13	40.2	396	2126	1	1	1	542.306	1082.6	2	1082.6	0.0004	355	365	0	71.57	33	1.4e-06	K	APVGVDTPSLK	I
1	RBR1	NGSrhino	Q Exactive	18	no	AT1G47870	Symbols: E2FC, ATE2F2, ATE2FC | winged-helix DNA-binding transcription factor family protein | chr1:17634937-17637557 FORWARD LENGTH=396	954	44460	18	13	40.2	396	2225	1	0	0	548.799	1095.58	2	1095.58	0.0019	156	165	0	78.21	34	4.3e-07	R	YDSSLGLLTK	K
1	RBR1	NGSrhino	Q Exactive	18	no	AT1G47870	Symbols: E2FC, ATE2F2, ATE2FC | winged-helix DNA-binding transcription factor family protein | chr1:17634937-17637557 FORWARD LENGTH=396	954	44460	18	13	40.2	396	2944	1	1	1	588.836	1175.66	2	1175.65	0.003	287	296	0	51.39	34	0.0002	R	FQNQTLLAIK	A	Deamidated (NQ)	0.0020000000.0
1	RBR1	NGSrhino	Q Exactive	18	no	AT1G47870	Symbols: E2FC, ATE2F2, ATE2FC | winged-helix DNA-binding transcription factor family protein | chr1:17634937-17637557 FORWARD LENGTH=396	954	44460	18	13	40.2	396	3607	1	1	1	626.34	1250.66	2	1250.66	0.0064	325	335	0	67.6	35	6.2e-06	R	MGPIDVYLLSK	Y	Oxidation (M)	0.30000000000.0
1	RBR1	NGSrhino	Q Exactive	18	no	AT1G47870	Symbols: E2FC, ATE2F2, ATE2FC | winged-helix DNA-binding transcription factor family protein | chr1:17634937-17637557 FORWARD LENGTH=396	954	44460	18	13	40.2	396	4735	1	1	1	699.297	1396.58	2	1396.58	0.001	238	249	0	87.07	30	2.3e-08	K	SEVESMQSEESR	L
1	RBR1	NGSrhino	Q Exactive	18	no	AT1G47870	Symbols: E2FC, ATE2F2, ATE2FC | winged-helix DNA-binding transcription factor family protein | chr1:17634937-17637557 FORWARD LENGTH=396	954	44460	18	13	40.2	396	5384	1	1	1	493.589	1477.75	3	1477.74	0.0043	23	35	0	53.43	37	0.00024	R	FELLQSISSSDPR	Y
1	RBR1	NGSrhino	Q Exactive	18	no	AT1G47870	Symbols: E2FC, ATE2F2, ATE2FC | winged-helix DNA-binding transcription factor family protein | chr1:17634937-17637557 FORWARD LENGTH=396	954	44460	18	13	40.2	396	7210	1	1	1	874.898	1747.78	2	1747.78	0.001	273	286	0	71.83	34	1.9e-06	R	YMFMTEEDITSLPR	F	Oxidation (M)	0.03000000000000.0
1	RBR1	NGSrhino	Q Exactive	18	no	AT1G47870	Symbols: E2FC, ATE2F2, ATE2FC | winged-helix DNA-binding transcription factor family protein | chr1:17634937-17637557 FORWARD LENGTH=396	954	44460	18	13	40.2	396	7399	1	0	0	895.5	1788.99	2	1788.99	-0.001	195	210	0	111.72	33	1.4e-10	R	IYDITNVLEGIGLIEK	T
1	RBR1	NGSrhino	Q Exactive	18	no	AT1G47870	Symbols: E2FC, ATE2F2, ATE2FC | winged-helix DNA-binding transcription factor family protein | chr1:17634937-17637557 FORWARD LENGTH=396	954	44460	18	13	40.2	396	8064	1	1	1	942.925	1883.84	2	1883.84	-0.0046	2	18	0	134.66	34	1.1e-12	M	AATSNSGEDPTLSYHHR	S	Acetyl (Protein N-term)	1.00000000000000000.0
1	RBR1	NGSrhino	Q Exactive	18	no	AT1G47870	Symbols: E2FC, ATE2F2, ATE2FC | winged-helix DNA-binding transcription factor family protein | chr1:17634937-17637557 FORWARD LENGTH=396	954	44460	18	13	40.2	396	8152	1	1	1	952.493	1902.97	2	1902.97	-0.0013	87	105	0	116.48	36	9.7e-11	R	IQLGSIANMSGGESIDIAK	V
1	RBR1	NGSrhino	Q Exactive	19	no	AT2G36010	Symbols: E2F3, ATE2FA | E2F transcription factor 3 | chr2:15119688-15122893 FORWARD LENGTH=483	949	52565	21	12	37.5	483	812	1	1	1	453.224	904.434	2	904.432	0.0012	188	195	0	59.62	36	4.7e-05	K	DGMLDLNK	A
1	RBR1	NGSrhino	Q Exactive	19	no	AT2G36010	Symbols: E2F3, ATE2FA | E2F transcription factor 3 | chr2:15119688-15122893 FORWARD LENGTH=483	949	52565	21	12	37.5	483	1415	1	1	1	494.77	987.526	2	987.524	0.0027	196	204	0	56.41	37	0.00013	K	AAETLEVQK	R
1	RBR1	NGSrhino	Q Exactive	19	no	AT2G36010	Symbols: E2F3, ATE2FA | E2F transcription factor 3 | chr2:15119688-15122893 FORWARD LENGTH=483	949	52565	21	12	37.5	483	2225	1	0	0	548.799	1095.58	2	1095.58	0.0019	168	177	0	78.21	34	4.3e-07	R	YDSSLGLLTK	K
1	RBR1	NGSrhino	Q Exactive	19	no	AT2G36010	Symbols: E2F3, ATE2FA | E2F transcription factor 3 | chr2:15119688-15122893 FORWARD LENGTH=483	949	52565	21	12	37.5	483	3906	1	1	1	640.332	1278.65	2	1278.65	0.0006	284	293	0	39.88	36	0.0051	K	WLFVTEEDIK	S
1	RBR1	NGSrhino	Q Exactive	19	no	AT2G36010	Symbols: E2F3, ATE2FA | E2F transcription factor 3 | chr2:15119688-15122893 FORWARD LENGTH=483	949	52565	21	12	37.5	483	4472	1	1	1	683.305	1364.6	2	1364.6	-0.0006	60	71	0	86.64	33	5.4e-08	R	FNPSSLSNNNDR	S	Deamidated (NQ)	0.000000020000.0
1	RBR1	NGSrhino	Q Exactive	19	no	AT2G36010	Symbols: E2F3, ATE2FA | E2F transcription factor 3 | chr2:15119688-15122893 FORWARD LENGTH=483	949	52565	21	12	37.5	483	5707	1	1	1	758.431	1514.85	2	1514.85	0.0016	294	307	0	76.71	32	4e-07	K	SLPGFQNQTLIAVK	A
1	RBR1	NGSrhino	Q Exactive	19	no	AT2G36010	Symbols: E2F3, ATE2FA | E2F transcription factor 3 | chr2:15119688-15122893 FORWARD LENGTH=483	949	52565	21	12	37.5	483	7837	1	1	1	924.5	1846.99	2	1846.99	-0.0064	207	222	0	97.93	34	4.5e-09	R	IYDITNVLEGIDLIEK	P
1	RBR1	NGSrhino	Q Exactive	19	no	AT2G36010	Symbols: E2F3, ATE2FA | E2F transcription factor 3 | chr2:15119688-15122893 FORWARD LENGTH=483	949	52565	21	12	37.5	483	7940	1	1	1	936.454	1870.89	2	1870.9	-0.009	336	352	0	99.51	36	5e-09	R	STMGPIDVYLVSEFEGK	F
1	RBR1	NGSrhino	Q Exactive	19	no	AT2G36010	Symbols: E2F3, ATE2FA | E2F transcription factor 3 | chr2:15119688-15122893 FORWARD LENGTH=483	949	52565	21	12	37.5	483	10128	1	1	1	1110.61	2219.21	2	2219.21	0.0003	207	225	1	88.71	30	1.7e-08	R	IYDITNVLEGIDLIEKPFK	N
1	RBR1	NGSrhino	Q Exactive	19	no	AT2G36010	Symbols: E2F3, ATE2FA | E2F transcription factor 3 | chr2:15119688-15122893 FORWARD LENGTH=483	949	52565	21	12	37.5	483	10257	1	1	1	751.688	2252.04	3	2252.05	-0.0029	308	328	0	79.61	36	4.6e-07	K	APHGTTLEVPDPDEAADHPQR	R
1	RBR1	NGSrhino	Q Exactive	19	no	AT2G36010	Symbols: E2F3, ATE2FA | E2F transcription factor 3 | chr2:15119688-15122893 FORWARD LENGTH=483	949	52565	21	12	37.5	483	13070	1	1	1	1636.25	3270.49	2	3270.49	-0.004	422	449	0	112.22	34	1.7e-10	K	ITPSDVENDESDYWLLSNAEISMTDIWK	T
1	RBR1	NGSrhino	Q Exactive	19	no	AT2G36010	Symbols: E2F3, ATE2FA | E2F transcription factor 3 | chr2:15119688-15122893 FORWARD LENGTH=483	949	52565	21	12	37.5	483	13149	1	1	1	832.694	3326.75	4	3326.74	0.0076	7	39	0	34.23	31	0.0053	R	SSPGSSQPPPPPPHHPPSSPVPVTSTPVIPPIR	R
1	RBR1	NGSrhino	Q Exactive	20	yes	AT2G44060	Symbols: | Late embryogenesis abundant protein, group 2 | chr2:18226922-18227988 FORWARD LENGTH=325	909	36014	23	16	63.1	325	104	1	1	1	407.258	812.502	2	812.501	0.0013	176	182	0	37.46	30	0.0023	R	LTLPLEK	C
1	RBR1	NGSrhino	Q Exactive	20	yes	AT2G44060	Symbols: | Late embryogenesis abundant protein, group 2 | chr2:18226922-18227988 FORWARD LENGTH=325	909	36014	23	16	63.1	325	930	1	1	1	461.257	920.498	2	920.497	0.0017	57	65	0	64.41	35	1.3e-05	K	LEGTIGFGK	P
1	RBR1	NGSrhino	Q Exactive	20	yes	AT2G44060	Symbols: | Late embryogenesis abundant protein, group 2 | chr2:18226922-18227988 FORWARD LENGTH=325	909	36014	23	16	63.1	325	1079	1	1	1	472.258	942.502	2	942.502	-0.0002	191	198	1	53.97	33	9.1e-05	K	KPDVDIEK	I
1	RBR1	NGSrhino	Q Exactive	20	yes	AT2G44060	Symbols: | Late embryogenesis abundant protein, group 2 | chr2:18226922-18227988 FORWARD LENGTH=325	909	36014	23	16	63.1	325	2031	1	1	1	535.828	1069.64	2	1069.64	0.0031	83	92	0	41.91	32	0.001	R	ADIVVDVLVK	N
1	RBR1	NGSrhino	Q Exactive	20	yes	AT2G44060	Symbols: | Late embryogenesis abundant protein, group 2 | chr2:18226922-18227988 FORWARD LENGTH=325	909	36014	23	16	63.1	325	2044	1	1	1	537.268	1072.52	2	1072.52	0.0023	48	56	0	44.29	34	0.0012	K	DFIHDIGEK	L
1	RBR1	NGSrhino	Q Exactive	20	yes	AT2G44060	Symbols: | Late embryogenesis abundant protein, group 2 | chr2:18226922-18227988 FORWARD LENGTH=325	909	36014	23	16	63.1	325	3579	1	1	1	624.852	1247.69	2	1247.69	0.0028	66	77	0	63.83	34	1.2e-05	K	PTADVSAIHIPK	I
1	RBR1	NGSrhino	Q Exactive	20	yes	AT2G44060	Symbols: | Late embryogenesis abundant protein, group 2 | chr2:18226922-18227988 FORWARD LENGTH=325	909	36014	23	16	63.1	325	3933	1	1	1	642.381	1282.75	2	1282.75	-0.0023	115	127	0	40.71	30	0.001	K	LVSGLIPDAGTLK	A
1	RBR1	NGSrhino	Q Exactive	20	yes	AT2G44060	Symbols: | Late embryogenesis abundant protein, group 2 | chr2:18226922-18227988 FORWARD LENGTH=325	909	36014	23	16	63.1	325	4017	1	1	1	647.892	1293.77	2	1293.77	0.0037	164	175	0	43.75	26	0.00018	K	VDLIVDVPVLGR	L
1	RBR1	NGSrhino	Q Exactive	20	yes	AT2G44060	Symbols: | Late embryogenesis abundant protein, group 2 | chr2:18226922-18227988 FORWARD LENGTH=325	909	36014	23	16	63.1	325	4083	1	1	1	652.381	1302.75	2	1302.74	0.0041	136	146	0	80.11	31	1.2e-07	K	IPLTLIYDDIK	S
1	RBR1	NGSrhino	Q Exactive	20	yes	AT2G44060	Symbols: | Late embryogenesis abundant protein, group 2 | chr2:18226922-18227988 FORWARD LENGTH=325	909	36014	23	16	63.1	325	4467	1	1	1	682.828	1363.64	2	1363.64	-0.0025	290	302	0	59.88	36	4.5e-05	K	GNIDVDTPFGAMK	L
1	RBR1	NGSrhino	Q Exactive	20	yes	AT2G44060	Symbols: | Late embryogenesis abundant protein, group 2 | chr2:18226922-18227988 FORWARD LENGTH=325	909	36014	23	16	63.1	325	4777	1	1	1	702.356	1402.7	2	1402.69	0.0035	2	13	1	72.94	36	2.4e-06	M	STSEDKPEIISR	V	Acetyl (Protein N-term)	1.000000000000.0
1	RBR1	NGSrhino	Q Exactive	20	yes	AT2G44060	Symbols: | Late embryogenesis abundant protein, group 2 | chr2:18226922-18227988 FORWARD LENGTH=325	909	36014	23	16	63.1	325	5580	1	1	1	747.88	1493.75	2	1493.75	-0.0011	14	26	0	99.37	36	5.7e-09	R	VVHQEGDVEIVDR	S
1	RBR1	NGSrhino	Q Exactive	20	yes	AT2G44060	Symbols: | Late embryogenesis abundant protein, group 2 | chr2:18226922-18227988 FORWARD LENGTH=325	909	36014	23	16	63.1	325	5696	1	1	1	757.425	1512.84	2	1512.83	0.0054	204	216	0	113.33	33	1e-10	K	FSLEETVAILHVR	L
1	RBR1	NGSrhino	Q Exactive	20	yes	AT2G44060	Symbols: | Late embryogenesis abundant protein, group 2 | chr2:18226922-18227988 FORWARD LENGTH=325	909	36014	23	16	63.1	325	7235	1	1	1	877.434	1752.85	2	1752.85	0.0039	147	161	0	91.13	36	3.6e-08	K	STYNDINPGMIIPYR	I
1	RBR1	NGSrhino	Q Exactive	20	yes	AT2G44060	Symbols: | Late embryogenesis abundant protein, group 2 | chr2:18226922-18227988 FORWARD LENGTH=325	909	36014	23	16	63.1	325	10624	1	1	1	1161.12	2320.22	2	2320.21	0.0091	93	113	0	116.36	33	5.2e-11	K	NPNPVPIPLIDVNYLVESDGR	K
1	RBR1	NGSrhino	Q Exactive	20	yes	AT2G44060	Symbols: | Late embryogenesis abundant protein, group 2 | chr2:18226922-18227988 FORWARD LENGTH=325	909	36014	23	16	63.1	325	12818	1	1	1	1535.2	3068.38	2	3068.39	-0.0083	217	243	0	36.3	33	0.0059	R	LQNMNDFDLGLNDLDCEVWLCDVSIGK	A
1	RBR1	NGSrhino	Q Exactive	21	yes	AT5G09810	Symbols: ACT7 | actin 7 | chr5:3052809-3054220 FORWARD LENGTH=377	904	41709	20	11	42.7	377	1100	1	1	0	473.279	944.543	2	944.544	-0.0013	31	39	0	39.11	35	0.0043	R	AVFPSIVGR	P
1	RBR1	NGSrhino	Q Exactive	21	yes	AT5G09810	Symbols: ACT7 | actin 7 | chr5:3052809-3054220 FORWARD LENGTH=377	904	41709	20	11	42.7	377	1327	1	1	0	488.728	975.442	2	975.441	0.0012	21	30	0	69.61	35	3.6e-06	K	AGFAGDDAPR	A
1	RBR1	NGSrhino	Q Exactive	21	yes	AT5G09810	Symbols: ACT7 | actin 7 | chr5:3052809-3054220 FORWARD LENGTH=377	904	41709	20	11	42.7	377	2683	1	1	0	572.784	1143.55	2	1143.55	0.0003	42	52	0	74.86	35	1e-06	R	HTGVMVGMGQK	D
1	RBR1	NGSrhino	Q Exactive	21	yes	AT5G09810	Symbols: ACT7 | actin 7 | chr5:3052809-3054220 FORWARD LENGTH=377	904	41709	20	11	42.7	377	2702	1	1	0	574.307	1146.6	2	1146.6	0.0033	318	328	0	44.36	37	0.0021	K	EITALAPSSMK	I
1	RBR1	NGSrhino	Q Exactive	21	yes	AT5G09810	Symbols: ACT7 | actin 7 | chr5:3052809-3054220 FORWARD LENGTH=377	904	41709	20	11	42.7	377	2991	1	1	0	591.767	1181.52	2	1181.52	-0.0006	53	63	0	45.3	34	0.00076	K	DAYVGDEAQSK	R
1	RBR1	NGSrhino	Q Exactive	21	yes	AT5G09810	Symbols: ACT7 | actin 7 | chr5:3052809-3054220 FORWARD LENGTH=377	904	41709	20	11	42.7	377	5344	1	1	1	492.564	1474.67	3	1474.67	0	362	374	0	86.72	34	5.9e-08	K	SEYDESGPSIVHR	K
1	RBR1	NGSrhino	Q Exactive	21	yes	AT5G09810	Symbols: ACT7 | actin 7 | chr5:3052809-3054220 FORWARD LENGTH=377	904	41709	20	11	42.7	377	7329	1	1	0	887.952	1773.89	2	1773.89	0.0004	241	256	0	118.63	36	6.2e-11	K	NYELPDGQVITIGAER	F
1	RBR1	NGSrhino	Q Exactive	21	yes	AT5G09810	Symbols: ACT7 | actin 7 | chr5:3052809-3054220 FORWARD LENGTH=377	904	41709	20	11	42.7	377	7872	1	1	1	928.472	1854.93	2	1854.93	0.0046	218	233	0	77.23	36	8.3e-07	K	LAYVALDYEQELETAK	S
1	RBR1	NGSrhino	Q Exactive	21	yes	AT5G09810	Symbols: ACT7 | actin 7 | chr5:3052809-3054220 FORWARD LENGTH=377	904	41709	20	11	42.7	377	8311	1	1	0	966.944	1931.87	2	1931.87	0.0018	71	86	0	118.36	34	4.2e-11	K	YPIEHGIVSNWDDMEK	I
1	RBR1	NGSrhino	Q Exactive	21	yes	AT5G09810	Symbols: ACT7 | actin 7 | chr5:3052809-3054220 FORWARD LENGTH=377	904	41709	20	11	42.7	377	8431	1	1	0	977.536	1953.06	2	1953.06	0.0009	98	115	0	63.79	32	7.4e-06	R	VAPEEHPVLLTEAPLNPK	A
1	RBR1	NGSrhino	Q Exactive	21	yes	AT5G09810	Symbols: ACT7 | actin 7 | chr5:3052809-3054220 FORWARD LENGTH=377	904	41709	20	11	42.7	377	12932	1	1	0	1051.22	3150.64	3	3150.64	0.0008	150	179	0	121.67	32	1.2e-11	R	TTGIVLDSGDGVSHTVPIYEGYALPHAILR	L
1	RBR1	NGSrhino	Q Exactive	22	yes	AT1G07920	Symbols: | GTP binding Elongation factor Tu family protein | chr1:2455559-2457001 FORWARD LENGTH=449	897	49471	24	13	31.2	449	179	1	1	1	413.209	824.402	2	824.403	-0.0004	311	318	0	37.14	33	0.0046	R	GYVASNSK	D
1	RBR1	NGSrhino	Q Exactive	22	yes	AT1G07920	Symbols: | GTP binding Elongation factor Tu family protein | chr1:2455559-2457001 FORWARD LENGTH=449	897	49471	24	13	31.2	449	874	1	1	1	457.787	913.559	2	913.56	-0.0004	419	427	0	64.78	31	4.9e-06	R	QTVAVGVIK	S
1	RBR1	NGSrhino	Q Exactive	22	yes	AT1G07920	Symbols: | GTP binding Elongation factor Tu family protein | chr1:2455559-2457001 FORWARD LENGTH=449	897	49471	24	13	31.2	449	1324	1	1	1	488.281	974.547	2	974.544	0.0031	236	243	0	54.09	35	0.00015	R	LPLQDVYK	I
1	RBR1	NGSrhino	Q Exactive	22	yes	AT1G07920	Symbols: | GTP binding Elongation factor Tu family protein | chr1:2455559-2457001 FORWARD LENGTH=449	897	49471	24	13	31.2	449	1706	1	1	1	513.309	1024.6	2	1024.6	0.0014	244	254	0	64.31	29	3e-06	K	IGGIGTVPVGR	V
1	RBR1	NGSrhino	Q Exactive	22	yes	AT1G07920	Symbols: | GTP binding Elongation factor Tu family protein | chr1:2455559-2457001 FORWARD LENGTH=449	897	49471	24	13	31.2	449	1708	1	1	1	513.749	1025.48	2	1025.48	0.001	205	212	0	49.16	35	0.0004	R	STNLDWYK	G
1	RBR1	NGSrhino	Q Exactive	22	yes	AT1G07920	Symbols: | GTP binding Elongation factor Tu family protein | chr1:2455559-2457001 FORWARD LENGTH=449	897	49471	24	13	31.2	449	2492	1	1	1	560.804	1119.59	2	1119.59	0.0016	21	30	0	46.85	36	0.00092	K	STTTGHLIYK	L
1	RBR1	NGSrhino	Q Exactive	22	yes	AT1G07920	Symbols: | GTP binding Elongation factor Tu family protein | chr1:2455559-2457001 FORWARD LENGTH=449	897	49471	24	13	31.2	449	4046	1	1	1	433.587	1297.74	3	1297.74	-0.001	135	146	0	64.55	31	5.1e-06	R	EHALLAFTLGVK	Q
1	RBR1	NGSrhino	Q Exactive	22	yes	AT1G07920	Symbols: | GTP binding Elongation factor Tu family protein | chr1:2455559-2457001 FORWARD LENGTH=449	897	49471	24	13	31.2	449	6467	1	1	1	545.64	1633.9	3	1633.89	0.0034	6	20	0	61.67	32	1.1e-05	K	FHINIVVIGHVDSGK	S
1	RBR1	NGSrhino	Q Exactive	22	yes	AT1G07920	Symbols: | GTP binding Elongation factor Tu family protein | chr1:2455559-2457001 FORWARD LENGTH=449	897	49471	24	13	31.2	449	6477	1	1	1	819.447	1636.88	2	1636.87	0.0127	213	227	0	59.98	33	2.2e-05	K	GPTLLEALDQINEPK	R
1	RBR1	NGSrhino	Q Exactive	22	yes	AT1G07920	Symbols: | GTP binding Elongation factor Tu family protein | chr1:2455559-2457001 FORWARD LENGTH=449	897	49471	24	13	31.2	449	7054	1	1	1	861.434	1720.85	2	1720.85	0.0034	397	411	0	109.55	36	5.5e-10	K	PMVVETFSEYPPLGR	F
1	RBR1	NGSrhino	Q Exactive	22	yes	AT1G07920	Symbols: | GTP binding Elongation factor Tu family protein | chr1:2455559-2457001 FORWARD LENGTH=449	897	49471	24	13	31.2	449	7282	1	1	1	882.468	1762.92	2	1762.92	0.0044	262	278	0	53.86	35	0.00014	K	PGMVVTFAPTGLTTEVK	S	Oxidation (M)	0.00300000000000000.0
1	RBR1	NGSrhino	Q Exactive	22	yes	AT1G07920	Symbols: | GTP binding Elongation factor Tu family protein | chr1:2455559-2457001 FORWARD LENGTH=449	897	49471	24	13	31.2	449	10349	1	1	1	1140.57	2279.14	2	2279.13	0.002	392	411	1	86.92	36	8.3e-08	K	MTPTKPMVVETFSEYPPLGR	F
1	RBR1	NGSrhino	Q Exactive	22	yes	AT1G07920	Symbols: | GTP binding Elongation factor Tu family protein | chr1:2455559-2457001 FORWARD LENGTH=449	897	49471	24	13	31.2	449	11197	1	1	1	836.452	2506.33	3	2505.32	1.012	255	278	1	79.23	32	2e-07	R	VETGMIKPGMVVTFAPTGLTTEVK	S
1	RBR1	NGSrhino	Q Exactive	23	yes	AT1G75780	Symbols: TUB1 | tubulin beta-1 chain | chr1:28451378-28453602 REVERSE LENGTH=447	851	50185	24	11	29.5	447	1948	1	0	0	530.269	1058.52	2	1058.52	0.0016	311	319	0	55.79	35	9.9e-05	R	YLTASAMFR	G
1	RBR1	NGSrhino	Q Exactive	23	yes	AT1G75780	Symbols: TUB1 | tubulin beta-1 chain | chr1:28451378-28453602 REVERSE LENGTH=447	851	50185	24	11	29.5	447	2079	1	0	0	539.27	1076.52	2	1076.53	-0.0004	156	163	1	42.4	37	0.0029	K	IREEYPDR	M
1	RBR1	NGSrhino	Q Exactive	23	yes	AT1G75780	Symbols: TUB1 | tubulin beta-1 chain | chr1:28451378-28453602 REVERSE LENGTH=447	851	50185	24	11	29.5	447	2649	1	0	0	570.35	1138.69	2	1138.69	-0.0012	254	263	0	58.43	26	6.2e-06	K	LAVNLIPFPR	L
1	RBR1	NGSrhino	Q Exactive	23	yes	AT1G75780	Symbols: TUB1 | tubulin beta-1 chain | chr1:28451378-28453602 REVERSE LENGTH=447	851	50185	24	11	29.5	447	2695	1	0	0	573.799	1145.58	2	1145.58	0.0014	243	252	0	68.66	37	7.5e-06	R	FPGQLNSDLR	K
1	RBR1	NGSrhino	Q Exactive	23	yes	AT1G75780	Symbols: TUB1 | tubulin beta-1 chain | chr1:28451378-28453602 REVERSE LENGTH=447	851	50185	24	11	29.5	447	3283	1	0	0	608.295	1214.58	2	1214.58	-0.0002	382	391	0	62.05	35	2.1e-05	R	VSEQFTAMFR	R
1	RBR1	NGSrhino	Q Exactive	23	yes	AT1G75780	Symbols: TUB1 | tubulin beta-1 chain | chr1:28451378-28453602 REVERSE LENGTH=447	851	50185	24	11	29.5	447	4617	1	0	0	692.856	1383.7	2	1383.69	0.0042	164	175	0	56.34	36	9.3e-05	R	MMLTFSVFPSPK	V
1	RBR1	NGSrhino	Q Exactive	23	yes	AT1G75780	Symbols: TUB1 | tubulin beta-1 chain | chr1:28451378-28453602 REVERSE LENGTH=447	851	50185	24	11	29.5	447	4959	1	1	1	714.87	1427.73	2	1427.73	-0.0003	326	337	0	47.26	36	0.00075	K	EVDEQILNVQNK	N
1	RBR1	NGSrhino	Q Exactive	23	yes	AT1G75780	Symbols: TUB1 | tubulin beta-1 chain | chr1:28451378-28453602 REVERSE LENGTH=447	851	50185	24	11	29.5	447	6417	1	0	0	541.624	1621.85	3	1621.84	0.0057	264	277	0	69.19	35	4.5e-06	R	LHFFMVGFAPLTSR	G
1	RBR1	NGSrhino	Q Exactive	23	yes	AT1G75780	Symbols: TUB1 | tubulin beta-1 chain | chr1:28451378-28453602 REVERSE LENGTH=447	851	50185	24	11	29.5	447	6640	1	0	1	824.407	1646.8	2	1646.8	-0.0013	64	78	0	76	36	1.1e-06	R	AVLMDLEPGTMDSIR	S
1	RBR1	NGSrhino	Q Exactive	23	yes	AT1G75780	Symbols: TUB1 | tubulin beta-1 chain | chr1:28451378-28453602 REVERSE LENGTH=447	851	50185	24	11	29.5	447	6934	1	0	0	849.411	1696.81	2	1696.81	-0.0016	338	351	0	88.86	36	6e-08	K	NSSYFVEWIPNNVK	S	Deamidated (NQ)	0.00000000002000.0
1	RBR1	NGSrhino	Q Exactive	23	yes	AT1G75780	Symbols: TUB1 | tubulin beta-1 chain | chr1:28451378-28453602 REVERSE LENGTH=447	851	50185	24	11	29.5	447	8436	1	1	0	979.004	1955.99	2	1956	-0.0012	105	122	0	149.53	35	3.7e-14	K	GHYTEGAELIDAVLDVVR	K
1	RBR1	NGSrhino	Q Exactive	24	yes	AT3G12110	Symbols: ACT11 | actin-11 | chr3:3858116-3859609 FORWARD LENGTH=377	805	41648	18	10	39.8	377	1100	1	0	0	473.279	944.543	2	944.544	-0.0013	31	39	0	39.11	35	0.0043	R	AVFPSIVGR	P
1	RBR1	NGSrhino	Q Exactive	24	yes	AT3G12110	Symbols: ACT11 | actin-11 | chr3:3858116-3859609 FORWARD LENGTH=377	805	41648	18	10	39.8	377	1327	1	0	0	488.728	975.442	2	975.441	0.0012	21	30	0	69.61	35	3.6e-06	K	AGFAGDDAPR	A
1	RBR1	NGSrhino	Q Exactive	24	yes	AT3G12110	Symbols: ACT11 | actin-11 | chr3:3858116-3859609 FORWARD LENGTH=377	805	41648	18	10	39.8	377	2683	1	0	0	572.784	1143.55	2	1143.55	0.0003	42	52	0	74.86	35	1e-06	R	HTGVMVGMGQK	D
1	RBR1	NGSrhino	Q Exactive	24	yes	AT3G12110	Symbols: ACT11 | actin-11 | chr3:3858116-3859609 FORWARD LENGTH=377	805	41648	18	10	39.8	377	2702	1	0	0	574.307	1146.6	2	1146.6	0.0033	318	328	0	44.36	37	0.0021	K	EITALAPSSMK	I
1	RBR1	NGSrhino	Q Exactive	24	yes	AT3G12110	Symbols: ACT11 | actin-11 | chr3:3858116-3859609 FORWARD LENGTH=377	805	41648	18	10	39.8	377	2991	1	0	0	591.767	1181.52	2	1181.52	-0.0006	53	63	0	45.3	34	0.00076	K	DAYVGDEAQSK	R
1	RBR1	NGSrhino	Q Exactive	24	yes	AT3G12110	Symbols: ACT11 | actin-11 | chr3:3858116-3859609 FORWARD LENGTH=377	805	41648	18	10	39.8	377	5242	1	1	0	730.343	1458.67	2	1458.67	-0.0015	362	374	0	85.21	35	9.9e-08	K	AEYDESGPSIVHR	K
1	RBR1	NGSrhino	Q Exactive	24	yes	AT3G12110	Symbols: ACT11 | actin-11 | chr3:3858116-3859609 FORWARD LENGTH=377	805	41648	18	10	39.8	377	8311	1	0	0	966.944	1931.87	2	1931.87	0.0018	71	86	0	118.36	34	4.2e-11	K	YPIEHGIVSNWDDMEK	I
1	RBR1	NGSrhino	Q Exactive	24	yes	AT3G12110	Symbols: ACT11 | actin-11 | chr3:3858116-3859609 FORWARD LENGTH=377	805	41648	18	10	39.8	377	8431	1	0	0	977.536	1953.06	2	1953.06	0.0009	98	115	0	63.79	32	7.4e-06	R	VAPEEHPVLLTEAPLNPK	A
1	RBR1	NGSrhino	Q Exactive	24	yes	AT3G12110	Symbols: ACT11 | actin-11 | chr3:3858116-3859609 FORWARD LENGTH=377	805	41648	18	10	39.8	377	10024	1	1	0	1099.56	2197.1	2	2196.09	1.0095	294	314	0	103.46	36	1.9e-09	K	DLYGNIVLSGGTTMFPGIADR	M
1	RBR1	NGSrhino	Q Exactive	24	yes	AT3G12110	Symbols: ACT11 | actin-11 | chr3:3858116-3859609 FORWARD LENGTH=377	805	41648	18	10	39.8	377	12932	1	0	0	1051.22	3150.64	3	3150.64	0.0008	150	179	0	121.67	32	1.2e-11	R	TTGIVLDSGDGVSHTVPIYEGYALPHAILR	L
1	RBR1	NGSrhino	Q Exactive	25	yes	AT5G09590	Symbols: MTHSC70-2, HSC70-5 | mitochondrial HSO70 2 | chr5:2975721-2978508 FORWARD LENGTH=682	799	72946	17	14	26.1	682	547	1	1	1	436.746	871.477	2	871.476	0.0005	215	222	0	51.21	34	0.00021	R	IAGLDVER	I
1	RBR1	NGSrhino	Q Exactive	25	yes	AT5G09590	Symbols: MTHSC70-2, HSC70-5 | mitochondrial HSO70 2 | chr5:2975721-2978508 FORWARD LENGTH=682	799	72946	17	14	26.1	682	1174	1	1	1	479.751	957.487	2	957.488	-0.0007	81	89	0	70.71	34	2.5e-06	K	VIENAEGAR	T
1	RBR1	NGSrhino	Q Exactive	25	yes	AT5G09590	Symbols: MTHSC70-2, HSC70-5 | mitochondrial HSO70 2 | chr5:2975721-2978508 FORWARD LENGTH=682	799	72946	17	14	26.1	682	1360	1	1	0	491.249	980.484	2	980.481	0.0022	180	188	0	74.21	36	1.8e-06	K	ETAEAYLGK	S
1	RBR1	NGSrhino	Q Exactive	25	yes	AT5G09590	Symbols: MTHSC70-2, HSC70-5 | mitochondrial HSO70 2 | chr5:2975721-2978508 FORWARD LENGTH=682	799	72946	17	14	26.1	682	1378	1	1	0	492.79	983.566	2	983.565	0.0005	101	110	0	50.11	30	0.00012	K	GELLVGTPAK	R
1	RBR1	NGSrhino	Q Exactive	25	yes	AT5G09590	Symbols: MTHSC70-2, HSC70-5 | mitochondrial HSO70 2 | chr5:2975721-2978508 FORWARD LENGTH=682	799	72946	17	14	26.1	682	2564	1	1	1	565.788	1129.56	2	1129.56	0.0009	613	622	0	68.92	35	4.9e-06	K	EIEDAVADLR	S
1	RBR1	NGSrhino	Q Exactive	25	yes	AT5G09590	Symbols: MTHSC70-2, HSC70-5 | mitochondrial HSO70 2 | chr5:2975721-2978508 FORWARD LENGTH=682	799	72946	17	14	26.1	682	2855	1	1	1	582.817	1163.62	2	1163.62	0.0003	90	100	0	52.38	35	0.00022	R	TTPSVVAFNTK	G
1	RBR1	NGSrhino	Q Exactive	25	yes	AT5G09590	Symbols: MTHSC70-2, HSC70-5 | mitochondrial HSO70 2 | chr5:2975721-2978508 FORWARD LENGTH=682	799	72946	17	14	26.1	682	3059	1	1	1	595.845	1189.67	2	1189.67	0.0043	398	408	0	83.87	33	8.9e-08	K	VQSIVAEIFGK	S
1	RBR1	NGSrhino	Q Exactive	25	yes	AT5G09590	Symbols: MTHSC70-2, HSC70-5 | mitochondrial HSO70 2 | chr5:2975721-2978508 FORWARD LENGTH=682	799	72946	17	14	26.1	682	3437	1	1	1	618.291	1234.57	2	1234.57	0.0003	552	563	0	64.08	35	1.5e-05	R	SSGGLSEDDIQK	M
1	RBR1	NGSrhino	Q Exactive	25	yes	AT5G09590	Symbols: MTHSC70-2, HSC70-5 | mitochondrial HSO70 2 | chr5:2975721-2978508 FORWARD LENGTH=682	799	72946	17	14	26.1	682	4509	1	1	1	685.876	1369.74	2	1369.74	0.0015	354	364	0	88.31	34	3.8e-08	R	FETLVNHLIER	T
1	RBR1	NGSrhino	Q Exactive	25	yes	AT5G09590	Symbols: MTHSC70-2, HSC70-5 | mitochondrial HSO70 2 | chr5:2975721-2978508 FORWARD LENGTH=682	799	72946	17	14	26.1	682	4878	1	1	1	709.368	1416.72	2	1416.72	0.0001	112	125	0	66.31	36	1.2e-05	R	QAVTNPTNTVSGTK	R
1	RBR1	NGSrhino	Q Exactive	25	yes	AT5G09590	Symbols: MTHSC70-2, HSC70-5 | mitochondrial HSO70 2 | chr5:2975721-2978508 FORWARD LENGTH=682	799	72946	17	14	26.1	682	4879	1	1	0	709.371	1416.73	2	1416.73	-0.0003	382	394	0	41.58	36	0.0034	K	EVDEVLLVGGMTR	V
1	RBR1	NGSrhino	Q Exactive	25	yes	AT5G09590	Symbols: MTHSC70-2, HSC70-5 | mitochondrial HSO70 2 | chr5:2975721-2978508 FORWARD LENGTH=682	799	72946	17	14	26.1	682	7428	1	1	1	897.459	1792.9	2	1792.9	0	223	239	0	94.08	36	1.7e-08	R	IINEPTAAALSYGMTNK	E
1	RBR1	NGSrhino	Q Exactive	25	yes	AT5G09590	Symbols: MTHSC70-2, HSC70-5 | mitochondrial HSO70 2 | chr5:2975721-2978508 FORWARD LENGTH=682	799	72946	17	14	26.1	682	8336	1	1	1	647.008	1938	3	1938	0.0029	413	432	0	86.88	35	7.1e-08	K	GVNPDEAVAMGAALQGGILR	G
1	RBR1	NGSrhino	Q Exactive	25	yes	AT5G09590	Symbols: MTHSC70-2, HSC70-5 | mitochondrial HSO70 2 | chr5:2975721-2978508 FORWARD LENGTH=682	799	72946	17	14	26.1	682	11047	1	1	1	819.471	2455.39	3	2455.39	-0.0017	437	459	0	109.88	25	3.6e-11	K	ELLLLDVTPLSLGIETLGGVFTR	L
1	RBR1	NGSrhino	Q Exactive	26	yes	AT4G20360	Symbols: ATRAB8D, ATRABE1B, RABE1b | RAB GTPase homolog E1B | chr4:10990036-10991466 FORWARD LENGTH=476	791	51598	15	11	37.2	476	165	1	1	1	412.256	822.497	2	822.496	0.0006	185	191	0	34.83	27	0.002	K	EHILLAK	Q
1	RBR1	NGSrhino	Q Exactive	26	yes	AT4G20360	Symbols: ATRAB8D, ATRABE1B, RABE1b | RAB GTPase homolog E1B | chr4:10990036-10991466 FORWARD LENGTH=476	791	51598	15	11	37.2	476	2221	1	1	1	548.325	1094.64	2	1094.64	-0.0013	382	390	0	53.56	30	4.5e-05	K	FEAIIYVLK	K
1	RBR1	NGSrhino	Q Exactive	26	yes	AT4G20360	Symbols: ATRAB8D, ATRABE1B, RABE1b | RAB GTPase homolog E1B | chr4:10990036-10991466 FORWARD LENGTH=476	791	51598	15	11	37.2	476	2781	1	1	1	579.331	1156.65	2	1156.65	0.0027	316	326	0	91.09	34	2.1e-08	K	VGETVDLVGLR	E
1	RBR1	NGSrhino	Q Exactive	26	yes	AT4G20360	Symbols: ATRAB8D, ATRABE1B, RABE1b | RAB GTPase homolog E1B | chr4:10990036-10991466 FORWARD LENGTH=476	791	51598	15	11	37.2	476	5007	1	1	1	718.337	1434.66	2	1434.66	-0.0042	113	124	1	78.55	35	4.8e-07	K	KYDEIDAAPEER	A
1	RBR1	NGSrhino	Q Exactive	26	yes	AT4G20360	Symbols: ATRAB8D, ATRABE1B, RABE1b | RAB GTPase homolog E1B | chr4:10990036-10991466 FORWARD LENGTH=476	791	51598	15	11	37.2	476	6843	1	1	1	841.479	1680.94	2	1680.94	0.0015	342	357	0	96.16	29	2.4e-09	K	ILDEALAGDNVGLLLR	G
1	RBR1	NGSrhino	Q Exactive	26	yes	AT4G20360	Symbols: ATRAB8D, ATRABE1B, RABE1b | RAB GTPase homolog E1B | chr4:10990036-10991466 FORWARD LENGTH=476	791	51598	15	11	37.2	476	7603	1	1	1	905.945	1809.87	2	1809.87	0.0004	127	142	0	108.32	36	6.9e-10	R	GITINTATVEYETENR	H
1	RBR1	NGSrhino	Q Exactive	26	yes	AT4G20360	Symbols: ATRAB8D, ATRABE1B, RABE1b | RAB GTPase homolog E1B | chr4:10990036-10991466 FORWARD LENGTH=476	791	51598	15	11	37.2	476	8169	1	1	1	954.031	1906.05	2	1906.04	0.0036	93	112	0	109.44	31	1.4e-10	K	TTLTAALTMALASIGSSVAK	K
1	RBR1	NGSrhino	Q Exactive	26	yes	AT4G20360	Symbols: ATRAB8D, ATRABE1B, RABE1b | RAB GTPase homolog E1B | chr4:10990036-10991466 FORWARD LENGTH=476	791	51598	15	11	37.2	476	9198	1	1	1	1026.01	2050.01	2	2050.01	0.0041	266	282	0	77.43	36	8.1e-07	K	IYELMDAVDDYIPIPQR	Q
1	RBR1	NGSrhino	Q Exactive	26	yes	AT4G20360	Symbols: ATRAB8D, ATRABE1B, RABE1b | RAB GTPase homolog E1B | chr4:10990036-10991466 FORWARD LENGTH=476	791	51598	15	11	37.2	476	9507	1	1	1	705.356	2113.05	3	2113.04	0.0033	205	222	0	61.1	36	3.4e-05	K	EDQVDDAELLELVELEVR	E
1	RBR1	NGSrhino	Q Exactive	26	yes	AT4G20360	Symbols: ATRAB8D, ATRABE1B, RABE1b | RAB GTPase homolog E1B | chr4:10990036-10991466 FORWARD LENGTH=476	791	51598	15	11	37.2	476	9614	1	1	1	712.385	2134.13	3	2134.13	0.0006	283	301	0	84.57	33	8.1e-08	R	QTELPFLLAVEDVFSITGR	G
1	RBR1	NGSrhino	Q Exactive	26	yes	AT4G20360	Symbols: ATRAB8D, ATRABE1B, RABE1b | RAB GTPase homolog E1B | chr4:10990036-10991466 FORWARD LENGTH=476	791	51598	15	11	37.2	476	13329	1	1	1	1146.24	3435.71	3	3435.72	-0.0083	223	254	0	63.74	34	1.1e-05	R	ELLSSYEFNGDDIPIISGSALLAVETLTENPK	V	Deamidated (NQ)	0.00000000200000000000000000000000.0
1	RBR1	NGSrhino	Q Exactive	27	yes	AT1G72730	Symbols: | DEA(D/H)-box RNA helicase family protein | chr1:27378040-27379593 REVERSE LENGTH=414	704	46741	18	12	31.6	414	24	1	0	0	400.224	798.434	2	798.435	-0.0007	64	70	0	52.94	31	7.2e-05	K	PSAIQQR	G
1	RBR1	NGSrhino	Q Exactive	27	yes	AT1G72730	Symbols: | DEA(D/H)-box RNA helicase family protein | chr1:27378040-27379593 REVERSE LENGTH=414	704	46741	18	12	31.6	414	579	1	0	0	438.727	875.44	2	875.439	0.0014	293	299	0	47.92	38	0.001	K	VDWLTDK	M
1	RBR1	NGSrhino	Q Exactive	27	yes	AT1G72730	Symbols: | DEA(D/H)-box RNA helicase family protein | chr1:27378040-27379593 REVERSE LENGTH=414	704	46741	18	12	31.6	414	1027	1	0	0	468.264	934.514	2	934.512	0.0021	131	139	0	58.14	35	5.8e-05	R	ALGDYLGVK	A
1	RBR1	NGSrhino	Q Exactive	27	yes	AT1G72730	Symbols: | DEA(D/H)-box RNA helicase family protein | chr1:27378040-27379593 REVERSE LENGTH=414	704	46741	18	12	31.6	414	1176	1	0	0	479.764	957.514	2	957.513	0.0009	120	127	0	49.98	34	0.00028	R	ELAQQIEK	V
1	RBR1	NGSrhino	Q Exactive	27	yes	AT1G72730	Symbols: | DEA(D/H)-box RNA helicase family protein | chr1:27378040-27379593 REVERSE LENGTH=414	704	46741	18	12	31.6	414	1645	1	0	0	509.277	1016.54	2	1016.54	0.0008	247	255	0	43.22	36	0.0023	R	DELTLEGIK	Q
1	RBR1	NGSrhino	Q Exactive	27	yes	AT1G72730	Symbols: | DEA(D/H)-box RNA helicase family protein | chr1:27378040-27379593 REVERSE LENGTH=414	704	46741	18	12	31.6	414	1869	1	0	0	524.262	1046.51	2	1046.51	0.0024	55	63	0	43.32	37	0.0024	R	GIYAYGFEK	P
1	RBR1	NGSrhino	Q Exactive	27	yes	AT1G72730	Symbols: | DEA(D/H)-box RNA helicase family protein | chr1:27378040-27379593 REVERSE LENGTH=414	704	46741	18	12	31.6	414	2918	1	0	0	587.329	1172.64	2	1172.64	0.0027	246	255	1	72.79	35	2e-06	K	RDELTLEGIK	Q
1	RBR1	NGSrhino	Q Exactive	27	yes	AT1G72730	Symbols: | DEA(D/H)-box RNA helicase family protein | chr1:27378040-27379593 REVERSE LENGTH=414	704	46741	18	12	31.6	414	4766	1	0	0	701.37	1400.73	2	1400.73	-0.0001	78	91	0	89.04	36	5.7e-08	K	GLDVIQQAQSGTGK	T
1	RBR1	NGSrhino	Q Exactive	27	yes	AT1G72730	Symbols: | DEA(D/H)-box RNA helicase family protein | chr1:27378040-27379593 REVERSE LENGTH=414	704	46741	18	12	31.6	414	6017	1	0	0	778.363	1554.71	2	1554.71	0.0059	186	198	0	89.43	35	3.8e-08	K	MFVLDEADEMLSR	G
1	RBR1	NGSrhino	Q Exactive	27	yes	AT1G72730	Symbols: | DEA(D/H)-box RNA helicase family protein | chr1:27378040-27379593 REVERSE LENGTH=414	704	46741	18	12	31.6	414	6140	1	1	1	790.422	1578.83	2	1578.83	-0.0004	202	214	0	53.2	35	0.00017	K	DQIYDIFQLLPSK	V
1	RBR1	NGSrhino	Q Exactive	27	yes	AT1G72730	Symbols: | DEA(D/H)-box RNA helicase family protein | chr1:27378040-27379593 REVERSE LENGTH=414	704	46741	18	12	31.6	414	7376	1	0	0	892.882	1783.75	2	1783.75	-0.0055	304	319	0	98.4	32	2.4e-09	R	DHTVSATHGDMDQNTR	D
1	RBR1	NGSrhino	Q Exactive	27	yes	AT1G72730	Symbols: | DEA(D/H)-box RNA helicase family protein | chr1:27378040-27379593 REVERSE LENGTH=414	704	46741	18	12	31.6	414	12477	1	0	0	965.837	2894.49	3	2894.49	-0.0028	343	367	0	69.68	33	2.6e-06	R	GIDVQQVSLVINFDLPTQPENYLHR	I
1	RBR1	NGSrhino	Q Exactive	28	yes	AT2G20580	Symbols: RPN1A, ATRPN1A | 26S proteasome regulatory subunit S2 1A | chr2:8859211-8864699 FORWARD LENGTH=891	691	98082	16	14	25.5	891	1676	1	1	0	511.272	1020.53	2	1020.53	0.0014	686	694	0	40.27	36	0.0042	K	VTVMDTLSR	L
1	RBR1	NGSrhino	Q Exactive	28	yes	AT2G20580	Symbols: RPN1A, ATRPN1A | 26S proteasome regulatory subunit S2 1A | chr2:8859211-8864699 FORWARD LENGTH=891	691	98082	16	14	25.5	891	2504	1	1	0	561.812	1121.61	2	1121.61	0.0008	325	334	0	65.51	35	1e-05	K	LSEGYLTLAR	D
1	RBR1	NGSrhino	Q Exactive	28	yes	AT2G20580	Symbols: RPN1A, ATRPN1A | 26S proteasome regulatory subunit S2 1A | chr2:8859211-8864699 FORWARD LENGTH=891	691	98082	16	14	25.5	891	3631	1	1	0	628.343	1254.67	2	1254.67	0.0034	828	840	0	89.8	33	2.5e-08	R	VGQAVDVVGQAGR	P
1	RBR1	NGSrhino	Q Exactive	28	yes	AT2G20580	Symbols: RPN1A, ATRPN1A | 26S proteasome regulatory subunit S2 1A | chr2:8859211-8864699 FORWARD LENGTH=891	691	98082	16	14	25.5	891	4295	1	1	1	668.844	1335.67	2	1335.67	0.0068	157	168	0	38	37	0.0088	R	NLAGEIAQEYTK	R
1	RBR1	NGSrhino	Q Exactive	28	yes	AT2G20580	Symbols: RPN1A, ATRPN1A | 26S proteasome regulatory subunit S2 1A | chr2:8859211-8864699 FORWARD LENGTH=891	691	98082	16	14	25.5	891	4781	1	1	0	702.438	1402.86	2	1402.86	0.0022	562	574	0	55.23	21	3.9e-06	R	FLPLGLGLLYLGK	Q
1	RBR1	NGSrhino	Q Exactive	28	yes	AT2G20580	Symbols: RPN1A, ATRPN1A | 26S proteasome regulatory subunit S2 1A | chr2:8859211-8864699 FORWARD LENGTH=891	691	98082	16	14	25.5	891	6045	1	1	1	781.875	1561.74	2	1561.74	-0.0006	35	47	1	65.08	36	1.3e-05	K	KDEDLSEEDLELK	Q
1	RBR1	NGSrhino	Q Exactive	28	yes	AT2G20580	Symbols: RPN1A, ATRPN1A | 26S proteasome regulatory subunit S2 1A | chr2:8859211-8864699 FORWARD LENGTH=891	691	98082	16	14	25.5	891	7000	1	1	1	572.682	1715.02	3	1715.03	-0.0024	869	883	0	66.96	22	3.7e-07	K	YIPLSPILEGFIILK	E
1	RBR1	NGSrhino	Q Exactive	28	yes	AT2G20580	Symbols: RPN1A, ATRPN1A | 26S proteasome regulatory subunit S2 1A | chr2:8859211-8864699 FORWARD LENGTH=891	691	98082	16	14	25.5	891	8091	1	1	1	630.313	1887.92	3	1887.91	0.0047	140	156	0	90.25	36	4e-08	R	LIGTEGDIGSWGHEYVR	N
1	RBR1	NGSrhino	Q Exactive	28	yes	AT2G20580	Symbols: RPN1A, ATRPN1A | 26S proteasome regulatory subunit S2 1A | chr2:8859211-8864699 FORWARD LENGTH=891	691	98082	16	14	25.5	891	8346	1	1	1	648.022	1941.04	3	1941.04	0.0006	811	827	1	65.87	33	5.2e-06	R	MMLTVDENLKPLSVPVR	V
1	RBR1	NGSrhino	Q Exactive	28	yes	AT2G20580	Symbols: RPN1A, ATRPN1A | 26S proteasome regulatory subunit S2 1A | chr2:8859211-8864699 FORWARD LENGTH=891	691	98082	16	14	25.5	891	8975	1	1	1	1014.49	2026.97	2	2026.97	0.0004	388	406	0	89.59	36	4.9e-08	K	LMTVPSDSTTGSSGNWLFK	N
1	RBR1	NGSrhino	Q Exactive	28	yes	AT2G20580	Symbols: RPN1A, ATRPN1A | 26S proteasome regulatory subunit S2 1A | chr2:8859211-8864699 FORWARD LENGTH=891	691	98082	16	14	25.5	891	9211	1	1	1	685.351	2053.03	3	2053.04	-0.0078	115	133	0	79.13	36	5e-07	K	YLSDILSVLALTMSADGER	E
1	RBR1	NGSrhino	Q Exactive	28	yes	AT2G20580	Symbols: RPN1A, ATRPN1A | 26S proteasome regulatory subunit S2 1A | chr2:8859211-8864699 FORWARD LENGTH=891	691	98082	16	14	25.5	891	11232	1	1	1	839.762	2516.26	3	2515.26	1	254	274	0	73.48	35	1.7e-06	K	FEEYPNALQIALFLDNTQYVK	Q
1	RBR1	NGSrhino	Q Exactive	28	yes	AT2G20580	Symbols: RPN1A, ATRPN1A | 26S proteasome regulatory subunit S2 1A | chr2:8859211-8864699 FORWARD LENGTH=891	691	98082	16	14	25.5	891	11700	1	1	1	888.102	2661.28	3	2660.28	1.0019	170	192	0	43.7	35	0.0017	R	QSEEASIDDLMELVQQIVAFHMK	H
1	RBR1	NGSrhino	Q Exactive	28	yes	AT2G20580	Symbols: RPN1A, ATRPN1A | 26S proteasome regulatory subunit S2 1A | chr2:8859211-8864699 FORWARD LENGTH=891	691	98082	16	14	25.5	891	12651	1	1	1	745.116	2976.43	4	2975.44	0.9905	193	218	0	99	35	4.8e-09	K	HNAETEAVDLLMDVEDLDLLLEHVDK	T
1	RBR1	NGSrhino	Q Exactive	29	yes	AT5G56010	Symbols: HSP81-3, Hsp81.3, AtHsp90-3, AtHsp90.3 | heat shock protein 81-3 | chr5:22681410-22683911 FORWARD LENGTH=699	639	80002	14	12	20.6	699	1116	1	1	1	475.245	948.476	2	948.476	-0.0004	441	449	0	78.66	37	8.1e-07	K	SGDELTSLK	D
1	RBR1	NGSrhino	Q Exactive	29	yes	AT5G56010	Symbols: HSP81-3, Hsp81.3, AtHsp90-3, AtHsp90.3 | heat shock protein 81-3 | chr5:22681410-22683911 FORWARD LENGTH=699	639	80002	14	12	20.6	699	1668	1	1	1	510.738	1019.46	2	1019.46	0.0023	278	285	0	38.27	35	0.0052	K	EEYAAFYK	S
1	RBR1	NGSrhino	Q Exactive	29	yes	AT5G56010	Symbols: HSP81-3, Hsp81.3, AtHsp90-3, AtHsp90.3 | heat shock protein 81-3 | chr5:22681410-22683911 FORWARD LENGTH=699	639	80002	14	12	20.6	699	2586	1	1	1	567.296	1132.58	2	1132.58	0.0012	472	481	0	45.38	37	0.0015	K	AVENSPFLEK	L
1	RBR1	NGSrhino	Q Exactive	29	yes	AT5G56010	Symbols: HSP81-3, Hsp81.3, AtHsp90-3, AtHsp90.3 | heat shock protein 81-3 | chr5:22681410-22683911 FORWARD LENGTH=699	639	80002	14	12	20.6	699	3638	1	1	1	628.851	1255.69	2	1255.69	-0.0007	88	99	0	48.59	34	0.00035	K	ADLVNNLGTIAR	S
1	RBR1	NGSrhino	Q Exactive	29	yes	AT5G56010	Symbols: HSP81-3, Hsp81.3, AtHsp90-3, AtHsp90.3 | heat shock protein 81-3 | chr5:22681410-22683911 FORWARD LENGTH=699	639	80002	14	12	20.6	699	3989	1	1	1	646.323	1290.63	2	1290.63	0.0016	34	45	0	68.65	37	7e-06	R	ELISNSSDALDK	I
1	RBR1	NGSrhino	Q Exactive	29	yes	AT5G56010	Symbols: HSP81-3, Hsp81.3, AtHsp90-3, AtHsp90.3 | heat shock protein 81-3 | chr5:22681410-22683911 FORWARD LENGTH=699	639	80002	14	12	20.6	699	5869	1	1	1	764.376	1526.74	2	1526.74	0.0018	286	298	0	73.86	36	2e-06	K	SLSNDWEEHLAVK	H
1	RBR1	NGSrhino	Q Exactive	29	yes	AT5G56010	Symbols: HSP81-3, Hsp81.3, AtHsp90-3, AtHsp90.3 | heat shock protein 81-3 | chr5:22681410-22683911 FORWARD LENGTH=699	639	80002	14	12	20.6	699	5873	1	1	1	764.405	1526.8	2	1526.79	0.0017	358	371	0	77.19	35	6.1e-07	K	GIVDSEDLPLNISR	E
1	RBR1	NGSrhino	Q Exactive	29	yes	AT5G56010	Symbols: HSP81-3, Hsp81.3, AtHsp90-3, AtHsp90.3 | heat shock protein 81-3 | chr5:22681410-22683911 FORWARD LENGTH=699	639	80002	14	12	20.6	699	6290	1	1	1	800.879	1599.74	2	1599.74	0.0023	457	470	0	75.24	35	1.1e-06	K	EGQNDIFYITGESK	K
1	RBR1	NGSrhino	Q Exactive	29	yes	AT5G56010	Symbols: HSP81-3, Hsp81.3, AtHsp90-3, AtHsp90.3 | heat shock protein 81-3 | chr5:22681410-22683911 FORWARD LENGTH=699	639	80002	14	12	20.6	699	6828	1	1	1	839.939	1677.86	2	1677.86	0.0023	72	87	0	108.52	36	6.3e-10	K	TNNTLTIIDSGIGMTK	A
1	RBR1	NGSrhino	Q Exactive	29	yes	AT5G56010	Symbols: HSP81-3, Hsp81.3, AtHsp90-3, AtHsp90.3 | heat shock protein 81-3 | chr5:22681410-22683911 FORWARD LENGTH=699	639	80002	14	12	20.6	699	7125	1	1	1	578.985	1733.93	3	1733.94	-0.0022	57	71	0	62.36	34	1.5e-05	K	LDGQPELFIHIIPDK	T
1	RBR1	NGSrhino	Q Exactive	29	yes	AT5G56010	Symbols: HSP81-3, Hsp81.3, AtHsp90-3, AtHsp90.3 | heat shock protein 81-3 | chr5:22681410-22683911 FORWARD LENGTH=699	639	80002	14	12	20.6	699	10202	1	1	1	747.385	2239.13	3	2239.14	-0.0099	486	505	0	108.62	35	5.4e-10	K	GIEVLYMVDAIDEYAIGQLK	E
1	RBR1	NGSrhino	Q Exactive	29	yes	AT5G56010	Symbols: HSP81-3, Hsp81.3, AtHsp90-3, AtHsp90.3 | heat shock protein 81-3 | chr5:22681410-22683911 FORWARD LENGTH=699	639	80002	14	12	20.6	699	10798	1	1	1	790.087	2367.24	3	2367.24	-0.0013	485	505	1	99.47	34	3.1e-09	K	KGIEVLYMVDAIDEYAIGQLK	E
1	RBR1	NGSrhino	Q Exactive	30	yes	AT2G37620	Symbols: ACT1, AAc1 | actin 1 | chr2:15779761-15781241 FORWARD LENGTH=377	628	41771	16	10	38.2	377	1100	1	0	0	473.279	944.543	2	944.544	-0.0013	31	39	0	39.11	35	0.0043	R	AVFPSIVGR	P
1	RBR1	NGSrhino	Q Exactive	30	yes	AT2G37620	Symbols: ACT1, AAc1 | actin 1 | chr2:15779761-15781241 FORWARD LENGTH=377	628	41771	16	10	38.2	377	1327	1	0	0	488.728	975.442	2	975.441	0.0012	21	30	0	69.61	35	3.6e-06	K	AGFAGDDAPR	A
1	RBR1	NGSrhino	Q Exactive	30	yes	AT2G37620	Symbols: ACT1, AAc1 | actin 1 | chr2:15779761-15781241 FORWARD LENGTH=377	628	41771	16	10	38.2	377	2575	1	1	0	566.768	1131.52	2	1131.52	0.0009	199	208	0	39.3	35	0.0037	R	GYSFTTTAER	E
1	RBR1	NGSrhino	Q Exactive	30	yes	AT2G37620	Symbols: ACT1, AAc1 | actin 1 | chr2:15779761-15781241 FORWARD LENGTH=377	628	41771	16	10	38.2	377	2683	1	0	0	572.784	1143.55	2	1143.55	0.0003	42	52	0	74.86	35	1e-06	R	HTGVMVGMGQK	D
1	RBR1	NGSrhino	Q Exactive	30	yes	AT2G37620	Symbols: ACT1, AAc1 | actin 1 | chr2:15779761-15781241 FORWARD LENGTH=377	628	41771	16	10	38.2	377	2702	1	0	0	574.307	1146.6	2	1146.6	0.0033	318	328	0	44.36	37	0.0021	K	EITALAPSSMK	I
1	RBR1	NGSrhino	Q Exactive	30	yes	AT2G37620	Symbols: ACT1, AAc1 | actin 1 | chr2:15779761-15781241 FORWARD LENGTH=377	628	41771	16	10	38.2	377	2991	1	0	0	591.767	1181.52	2	1181.52	-0.0006	53	63	0	45.3	34	0.00076	K	DAYVGDEAQSK	R
1	RBR1	NGSrhino	Q Exactive	30	yes	AT2G37620	Symbols: ACT1, AAc1 | actin 1 | chr2:15779761-15781241 FORWARD LENGTH=377	628	41771	16	10	38.2	377	5242	1	0	0	730.343	1458.67	2	1458.67	-0.0015	362	374	0	85.21	35	9.9e-08	K	AEYDESGPSIVHR	K
1	RBR1	NGSrhino	Q Exactive	30	yes	AT2G37620	Symbols: ACT1, AAc1 | actin 1 | chr2:15779761-15781241 FORWARD LENGTH=377	628	41771	16	10	38.2	377	8665	1	1	1	984.543	1967.07	2	1967.07	-0.0012	98	115	0	55.24	31	4e-05	R	VAPEEHPILLTEAPLNPK	A
1	RBR1	NGSrhino	Q Exactive	30	yes	AT2G37620	Symbols: ACT1, AAc1 | actin 1 | chr2:15779761-15781241 FORWARD LENGTH=377	628	41771	16	10	38.2	377	10024	1	0	0	1099.56	2197.1	2	2196.09	1.0095	294	314	0	103.46	36	1.9e-09	K	DLYGNIVLSGGTTMFPGIADR	M
1	RBR1	NGSrhino	Q Exactive	30	yes	AT2G37620	Symbols: ACT1, AAc1 | actin 1 | chr2:15779761-15781241 FORWARD LENGTH=377	628	41771	16	10	38.2	377	12932	1	0	0	1051.22	3150.64	3	3150.64	0.0008	150	179	0	121.67	32	1.2e-11	R	TTGIVLDSGDGVSHTVPIYEGYALPHAILR	L
1	RBR1	NGSrhino	Q Exactive	31	yes	AT1G56070	Symbols: LOS1 | Ribosomal protein S5/Elongation factor G/III/V family protein | chr1:20968245-20971077 REVERSE LENGTH=843	613	93830	16	15	23.3	843	374	1	1	1	426.216	850.417	2	850.418	-0.0016	4	10	0	48.5	36	0.00065	K	FTADELR	R
1	RBR1	NGSrhino	Q Exactive	31	yes	AT1G56070	Symbols: LOS1 | Ribosomal protein S5/Elongation factor G/III/V family protein | chr1:20968245-20971077 REVERSE LENGTH=843	613	93830	16	15	23.3	843	693	1	1	0	445.759	889.504	2	889.502	0.0017	483	490	0	38.49	35	0.0052	K	FSVSPVVR	V
1	RBR1	NGSrhino	Q Exactive	31	yes	AT1G56070	Symbols: LOS1 | Ribosomal protein S5/Elongation factor G/III/V family protein | chr1:20968245-20971077 REVERSE LENGTH=843	613	93830	16	15	23.3	843	819	1	1	1	453.738	905.461	2	905.461	0.0005	558	565	0	41.44	37	0.0045	K	SDPVVSFR	E
1	RBR1	NGSrhino	Q Exactive	31	yes	AT1G56070	Symbols: LOS1 | Ribosomal protein S5/Elongation factor G/III/V family protein | chr1:20968245-20971077 REVERSE LENGTH=843	613	93830	16	15	23.3	843	1033	1	1	1	468.748	935.482	2	935.482	-0.0003	472	479	0	53.56	37	0.00022	K	EVDAHPIR	A
1	RBR1	NGSrhino	Q Exactive	31	yes	AT1G56070	Symbols: LOS1 | Ribosomal protein S5/Elongation factor G/III/V family protein | chr1:20968245-20971077 REVERSE LENGTH=843	613	93830	16	15	23.3	843	1811	1	1	0	520.334	1038.65	2	1038.65	-0.0008	151	159	1	29.29	24	0.0033	R	IRPVLTVNK	M
1	RBR1	NGSrhino	Q Exactive	31	yes	AT1G56070	Symbols: LOS1 | Ribosomal protein S5/Elongation factor G/III/V family protein | chr1:20968245-20971077 REVERSE LENGTH=843	613	93830	16	15	23.3	843	2204	1	1	1	547.317	1092.62	2	1092.62	0.0014	713	722	0	39.46	32	0.0021	R	VIYASQITAK	P
1	RBR1	NGSrhino	Q Exactive	31	yes	AT1G56070	Symbols: LOS1 | Ribosomal protein S5/Elongation factor G/III/V family protein | chr1:20968245-20971077 REVERSE LENGTH=843	613	93830	16	15	23.3	843	2687	1	1	0	573.268	1144.52	2	1144.52	0.0036	674	683	0	47.91	33	0.00035	K	EGPLAEENMR	G
1	RBR1	NGSrhino	Q Exactive	31	yes	AT1G56070	Symbols: LOS1 | Ribosomal protein S5/Elongation factor G/III/V family protein | chr1:20968245-20971077 REVERSE LENGTH=843	613	93830	16	15	23.3	843	3228	1	1	0	604.306	1206.6	2	1206.59	0.0045	619	628	0	71.41	37	4.1e-06	K	ILAEEFGWDK	D
1	RBR1	NGSrhino	Q Exactive	31	yes	AT1G56070	Symbols: LOS1 | Ribosomal protein S5/Elongation factor G/III/V family protein | chr1:20968245-20971077 REVERSE LENGTH=843	613	93830	16	15	23.3	843	3301	1	1	1	609.814	1217.61	2	1217.61	0.0018	411	421	0	46.44	37	0.0012	R	IMGPNYIPGEK	K
1	RBR1	NGSrhino	Q Exactive	31	yes	AT1G56070	Symbols: LOS1 | Ribosomal protein S5/Elongation factor G/III/V family protein | chr1:20968245-20971077 REVERSE LENGTH=843	613	93830	16	15	23.3	843	4093	1	1	1	436.556	1306.65	3	1306.65	0.0009	21	32	0	46.63	37	0.0012	R	NMSVIAHVDHGK	S
1	RBR1	NGSrhino	Q Exactive	31	yes	AT1G56070	Symbols: LOS1 | Ribosomal protein S5/Elongation factor G/III/V family protein | chr1:20968245-20971077 REVERSE LENGTH=843	613	93830	16	15	23.3	843	4726	1	1	1	698.817	1395.62	2	1395.62	-0.0026	831	842	0	49.84	34	0.00033	K	EAMTPLSEFEDK	L
1	RBR1	NGSrhino	Q Exactive	31	yes	AT1G56070	Symbols: LOS1 | Ribosomal protein S5/Elongation factor G/III/V family protein | chr1:20968245-20971077 REVERSE LENGTH=843	613	93830	16	15	23.3	843	5626	1	1	1	751.844	1501.67	2	1501.67	0.001	593	606	0	115.3	34	8.7e-11	R	PMEEGLAEAIDDGR	I
1	RBR1	NGSrhino	Q Exactive	31	yes	AT1G56070	Symbols: LOS1 | Ribosomal protein S5/Elongation factor G/III/V family protein | chr1:20968245-20971077 REVERSE LENGTH=843	613	93830	16	15	23.3	843	10289	1	1	1	753.405	2257.19	3	2256.2	0.9957	33	55	0	137.42	33	4.3e-13	K	STLTDSLVAAAGIIAQEVAGDVR	M
1	RBR1	NGSrhino	Q Exactive	31	yes	AT1G56070	Symbols: LOS1 | Ribosomal protein S5/Elongation factor G/III/V family protein | chr1:20968245-20971077 REVERSE LENGTH=843	613	93830	16	15	23.3	843	12546	1	1	0	977.855	2930.54	3	2930.55	-0.0032	725	751	0	64.62	32	6.2e-06	R	LLEPVYMVEIQAPEGALGGIYSVLNQK	R
1	RBR1	NGSrhino	Q Exactive	31	yes	AT1G56070	Symbols: LOS1 | Ribosomal protein S5/Elongation factor G/III/V family protein | chr1:20968245-20971077 REVERSE LENGTH=843	613	93830	16	15	23.3	843	12549	1	1	0	978.813	2933.42	3	2932.41	1.007	94	120	0	82.25	35	2.1e-07	R	DGNEYLINLIDSPGHVDFSSEVTAALR	I	Deamidated (NQ)	0.002000000000000000000000000.0
1	RBR1	NGSrhino	Q Exactive	32	yes	AT1G49240	Symbols: ACT8 | actin 8 | chr1:18216539-18217947 FORWARD LENGTH=377	602	41836	14	9	36.3	377	998	1	1	0	466.274	930.532	2	930.529	0.0037	31	39	0	40.35	34	0.0029	R	AVFPSVVGR	P
1	RBR1	NGSrhino	Q Exactive	32	yes	AT1G49240	Symbols: ACT8 | actin 8 | chr1:18216539-18217947 FORWARD LENGTH=377	602	41836	14	9	36.3	377	1327	1	0	0	488.728	975.442	2	975.441	0.0012	21	30	0	69.61	35	3.6e-06	K	AGFAGDDAPR	A
1	RBR1	NGSrhino	Q Exactive	32	yes	AT1G49240	Symbols: ACT8 | actin 8 | chr1:18216539-18217947 FORWARD LENGTH=377	602	41836	14	9	36.3	377	2702	1	0	0	574.307	1146.6	2	1146.6	0.0033	318	328	0	44.36	37	0.0021	K	EITALAPSSMK	I
1	RBR1	NGSrhino	Q Exactive	32	yes	AT1G49240	Symbols: ACT8 | actin 8 | chr1:18216539-18217947 FORWARD LENGTH=377	602	41836	14	9	36.3	377	2991	1	0	0	591.767	1181.52	2	1181.52	-0.0006	53	63	0	45.3	34	0.00076	K	DAYVGDEAQSK	R
1	RBR1	NGSrhino	Q Exactive	32	yes	AT1G49240	Symbols: ACT8 | actin 8 | chr1:18216539-18217947 FORWARD LENGTH=377	602	41836	14	9	36.3	377	7329	1	0	0	887.952	1773.89	2	1773.89	0.0004	241	256	0	118.63	36	6.2e-11	K	NYELPDGQVITIGAER	F
1	RBR1	NGSrhino	Q Exactive	32	yes	AT1G49240	Symbols: ACT8 | actin 8 | chr1:18216539-18217947 FORWARD LENGTH=377	602	41836	14	9	36.3	377	7958	1	1	1	938.437	1874.86	2	1874.86	-0.0009	218	233	0	82.25	35	2e-07	K	LSFVAVDYEQEMETSK	T
1	RBR1	NGSrhino	Q Exactive	32	yes	AT1G49240	Symbols: ACT8 | actin 8 | chr1:18216539-18217947 FORWARD LENGTH=377	602	41836	14	9	36.3	377	8229	1	1	0	959.937	1917.86	2	1917.86	0.0027	71	86	0	114.41	34	1.1e-10	K	YPIEHGVVSNWDDMEK	I
1	RBR1	NGSrhino	Q Exactive	32	yes	AT1G49240	Symbols: ACT8 | actin 8 | chr1:18216539-18217947 FORWARD LENGTH=377	602	41836	14	9	36.3	377	8666	1	1	1	984.543	1967.07	2	1967.07	-0.001	98	115	0	39.26	31	0.0016	R	IAPEEHPVLLTEAPLNPK	A
1	RBR1	NGSrhino	Q Exactive	32	yes	AT1G49240	Symbols: ACT8 | actin 8 | chr1:18216539-18217947 FORWARD LENGTH=377	602	41836	14	9	36.3	377	12931	1	0	1	788.665	3150.63	4	3150.64	-0.0032	150	179	0	74.7	32	6.1e-07	R	TTGIVLDSGDGVSHTVPIYEGFSLPHAILR	L
1	RBR1	NGSrhino	Q Exactive	33	yes	AT3G48870	Symbols: ATCLPC, ATHSP93-III, HSP93-III | Clp ATPase | chr3:18122363-18126008 REVERSE LENGTH=952	567	105674	13	12	16.4	952	1685	1	1	0	511.772	1021.53	2	1021.53	0.0034	829	836	0	53.5	36	0.00019	R	LDEMIVFR	Q
1	RBR1	NGSrhino	Q Exactive	33	yes	AT3G48870	Symbols: ATCLPC, ATHSP93-III, HSP93-III | Clp ATPase | chr3:18122363-18126008 REVERSE LENGTH=952	567	105674	13	12	16.4	952	1733	1	1	0	515.288	1028.56	2	1028.56	0.0001	330	339	0	69.76	35	3.7e-06	K	TAIAEGLAQR	I
1	RBR1	NGSrhino	Q Exactive	33	yes	AT3G48870	Symbols: ATCLPC, ATHSP93-III, HSP93-III | Clp ATPase | chr3:18122363-18126008 REVERSE LENGTH=952	567	105674	13	12	16.4	952	2776	1	1	0	579.254	1156.49	2	1156.49	0.0034	693	701	0	70.83	31	1.2e-06	R	LDMSEFMER	H
1	RBR1	NGSrhino	Q Exactive	33	yes	AT3G48870	Symbols: ATCLPC, ATHSP93-III, HSP93-III | Clp ATPase | chr3:18122363-18126008 REVERSE LENGTH=952	567	105674	13	12	16.4	952	2938	1	1	1	588.309	1174.6	2	1174.6	0.0015	125	134	0	71.48	37	3.8e-06	K	VIMLSQEEAR	R
1	RBR1	NGSrhino	Q Exactive	33	yes	AT3G48870	Symbols: ATCLPC, ATHSP93-III, HSP93-III | Clp ATPase | chr3:18122363-18126008 REVERSE LENGTH=952	567	105674	13	12	16.4	952	3040	1	1	1	594.781	1187.55	2	1187.55	0.0024	793	802	0	53.37	33	9.9e-05	R	IGFDLDHDEK	D
1	RBR1	NGSrhino	Q Exactive	33	yes	AT3G48870	Symbols: ATCLPC, ATHSP93-III, HSP93-III | Clp ATPase | chr3:18122363-18126008 REVERSE LENGTH=952	567	105674	13	12	16.4	952	3230	1	1	0	604.324	1206.63	2	1206.64	-0.0028	438	447	1	44.76	36	0.0015	K	HIEKDPALER	R
1	RBR1	NGSrhino	Q Exactive	33	yes	AT3G48870	Symbols: ATCLPC, ATHSP93-III, HSP93-III | Clp ATPase | chr3:18122363-18126008 REVERSE LENGTH=952	567	105674	13	12	16.4	952	4832	1	1	1	706.329	1410.64	2	1410.64	0.002	875	887	0	68.1	36	6.5e-06	R	VVDEGFDPSYGAR	P
1	RBR1	NGSrhino	Q Exactive	33	yes	AT3G48870	Symbols: ATCLPC, ATHSP93-III, HSP93-III | Clp ATPase | chr3:18122363-18126008 REVERSE LENGTH=952	567	105674	13	12	16.4	952	5370	1	1	0	738.895	1475.78	2	1475.78	-0.0015	183	196	0	44.28	36	0.0016	R	GSGFVAVEIPFTPR	A
1	RBR1	NGSrhino	Q Exactive	33	yes	AT3G48870	Symbols: ATCLPC, ATHSP93-III, HSP93-III | Clp ATPase | chr3:18122363-18126008 REVERSE LENGTH=952	567	105674	13	12	16.4	952	5595	1	1	0	748.87	1495.72	2	1495.72	0.002	275	287	0	67.79	36	8.1e-06	K	MPTLEEYGTNLTK	L
1	RBR1	NGSrhino	Q Exactive	33	yes	AT3G48870	Symbols: ATCLPC, ATHSP93-III, HSP93-III | Clp ATPase | chr3:18122363-18126008 REVERSE LENGTH=952	567	105674	13	12	16.4	952	8108	1	1	1	946.525	1891.04	2	1891.04	-0.005	454	470	0	111.24	32	1.2e-10	K	VPEPTVEEAIQILQGLR	E
1	RBR1	NGSrhino	Q Exactive	33	yes	AT3G48870	Symbols: ATCLPC, ATHSP93-III, HSP93-III | Clp ATPase | chr3:18122363-18126008 REVERSE LENGTH=952	567	105674	13	12	16.4	952	8762	1	1	0	662.657	1984.95	3	1984.95	-0.0004	743	759	0	74.89	36	1.6e-06	K	AHPDVFNMMLQILEDGR	L
1	RBR1	NGSrhino	Q Exactive	33	yes	AT3G48870	Symbols: ATCLPC, ATHSP93-III, HSP93-III | Clp ATPase | chr3:18122363-18126008 REVERSE LENGTH=952	567	105674	13	12	16.4	952	11208	1	1	0	837.133	2508.38	3	2507.37	1.0013	136	160	0	87.24	30	2.2e-08	R	LGHNFVGTEQILLGLIGEGTGIAAK	V
1	RBR1	NGSrhino	Q Exactive	34	yes	AT2G15860	Symbols: | unknown protein; FUNCTIONS IN: molecular_function unknown; INVOLVED IN: biological_process unknown; LOCATED IN: cellular_component unknown; EXPRESSED IN: 24 plant structures; EXPRESSED DURING: 13 growth stages; Has 30201 Blast hits to 1	542	55540	11	10	30.1	512	1381	1	1	1	493.257	984.499	2	984.499	0.0001	325	333	0	46.52	34	0.00058	K	NLHNSSVSK	A
1	RBR1	NGSrhino	Q Exactive	34	yes	AT2G15860	Symbols: | unknown protein; FUNCTIONS IN: molecular_function unknown; INVOLVED IN: biological_process unknown; LOCATED IN: cellular_component unknown; EXPRESSED IN: 24 plant structures; EXPRESSED DURING: 13 growth stages; Has 30201 Blast hits to 1	542	55540	11	10	30.1	512	3294	1	1	1	609.289	1216.56	2	1216.56	0.0023	407	416	0	49.72	33	0.00025	K	IEWAEDPTEK	A
1	RBR1	NGSrhino	Q Exactive	34	yes	AT2G15860	Symbols: | unknown protein; FUNCTIONS IN: molecular_function unknown; INVOLVED IN: biological_process unknown; LOCATED IN: cellular_component unknown; EXPRESSED IN: 24 plant structures; EXPRESSED DURING: 13 growth stages; Has 30201 Blast hits to 1	542	55540	11	10	30.1	512	4061	1	1	1	651.325	1300.63	2	1300.64	-0.0023	169	180	0	94.46	35	1.3e-08	K	LENSVQQGSSPR	E
1	RBR1	NGSrhino	Q Exactive	34	yes	AT2G15860	Symbols: | unknown protein; FUNCTIONS IN: molecular_function unknown; INVOLVED IN: biological_process unknown; LOCATED IN: cellular_component unknown; EXPRESSED IN: 24 plant structures; EXPRESSED DURING: 13 growth stages; Has 30201 Blast hits to 1	542	55540	11	10	30.1	512	4147	1	1	1	658.838	1315.66	2	1315.66	0.0004	181	194	0	71.67	36	3.2e-06	R	EAGSGAPSLLETGK	A
1	RBR1	NGSrhino	Q Exactive	34	yes	AT2G15860	Symbols: | unknown protein; FUNCTIONS IN: molecular_function unknown; INVOLVED IN: biological_process unknown; LOCATED IN: cellular_component unknown; EXPRESSED IN: 24 plant structures; EXPRESSED DURING: 13 growth stages; Has 30201 Blast hits to 1	542	55540	11	10	30.1	512	4379	1	1	1	675.83	1349.65	2	1349.65	-0.0007	232	242	0	68.47	36	7.1e-06	K	DQVLEEVTFDR	C
1	RBR1	NGSrhino	Q Exactive	34	yes	AT2G15860	Symbols: | unknown protein; FUNCTIONS IN: molecular_function unknown; INVOLVED IN: biological_process unknown; LOCATED IN: cellular_component unknown; EXPRESSED IN: 24 plant structures; EXPRESSED DURING: 13 growth stages; Has 30201 Blast hits to 1	542	55540	11	10	30.1	512	5944	1	1	1	770.879	1539.74	2	1539.74	0.0012	17	29	1	43.85	37	0.0021	K	EEPVRGEEPEIEK	L
1	RBR1	NGSrhino	Q Exactive	34	yes	AT2G15860	Symbols: | unknown protein; FUNCTIONS IN: molecular_function unknown; INVOLVED IN: biological_process unknown; LOCATED IN: cellular_component unknown; EXPRESSED IN: 24 plant structures; EXPRESSED DURING: 13 growth stages; Has 30201 Blast hits to 1	542	55540	11	10	30.1	512	6033	1	1	1	780.909	1559.8	2	1559.8	-0.0006	124	138	0	91.1	36	3.4e-08	R	LEGASEESLLSQGLK	V
1	RBR1	NGSrhino	Q Exactive	34	yes	AT2G15860	Symbols: | unknown protein; FUNCTIONS IN: molecular_function unknown; INVOLVED IN: biological_process unknown; LOCATED IN: cellular_component unknown; EXPRESSED IN: 24 plant structures; EXPRESSED DURING: 13 growth stages; Has 30201 Blast hits to 1	542	55540	11	10	30.1	512	7672	1	1	1	908.435	1814.86	2	1814.85	0.0046	288	303	0	71.96	36	2.8e-06	K	QIQQLFSFADEMSGSK	A
1	RBR1	NGSrhino	Q Exactive	34	yes	AT2G15860	Symbols: | unknown protein; FUNCTIONS IN: molecular_function unknown; INVOLVED IN: biological_process unknown; LOCATED IN: cellular_component unknown; EXPRESSED IN: 24 plant structures; EXPRESSED DURING: 13 growth stages; Has 30201 Blast hits to 1	542	55540	11	10	30.1	512	10934	1	1	1	806.398	2416.17	3	2416.16	0.0102	334	356	0	89.69	36	5e-08	K	AADMATGFTNALAGLHVNDMIQR	T
1	RBR1	NGSrhino	Q Exactive	34	yes	AT2G15860	Symbols: | unknown protein; FUNCTIONS IN: molecular_function unknown; INVOLVED IN: biological_process unknown; LOCATED IN: cellular_component unknown; EXPRESSED IN: 24 plant structures; EXPRESSED DURING: 13 growth stages; Has 30201 Blast hits to 1	542	55540	11	10	30.1	512	12995	1	1	1	1071.18	3210.51	3	3210.53	-0.0144	424	454	0	141.48	35	2.4e-13	K	AETMAGYVEAVSNSFITGISDVSETYSAAIK	G
1	RBR1	NGSrhino	Q Exactive	35	yes	AT5G35360	Symbols: CAC2 | acetyl Co-enzyme a carboxylase biotin carboxylase subunit | chr5:13584300-13588268 FORWARD LENGTH=537	534	58350	13	11	30.2	537	546	1	1	1	436.746	871.477	2	871.476	0.0004	397	403	0	47.26	34	0.00052	K	QEDIVLR	G
1	RBR1	NGSrhino	Q Exactive	35	yes	AT5G35360	Symbols: CAC2 | acetyl Co-enzyme a carboxylase biotin carboxylase subunit | chr5:13584300-13588268 FORWARD LENGTH=537	534	58350	13	11	30.2	537	1159	1	1	1	478.291	954.567	2	954.565	0.0016	461	468	0	39.14	31	0.0015	K	LIVWAPTR	E
1	RBR1	NGSrhino	Q Exactive	35	yes	AT5G35360	Symbols: CAC2 | acetyl Co-enzyme a carboxylase biotin carboxylase subunit | chr5:13584300-13588268 FORWARD LENGTH=537	534	58350	13	11	30.2	537	2179	1	1	1	546.305	1090.6	2	1090.59	0.0041	496	504	0	62.72	36	2.2e-05	K	LILDVEDFK	N
1	RBR1	NGSrhino	Q Exactive	35	yes	AT5G35360	Symbols: CAC2 | acetyl Co-enzyme a carboxylase biotin carboxylase subunit | chr5:13584300-13588268 FORWARD LENGTH=537	534	58350	13	11	30.2	537	4162	1	1	1	659.367	1316.72	2	1316.72	0.0033	219	230	0	56.83	35	8.2e-05	R	VANEIGFPVMIK	A
1	RBR1	NGSrhino	Q Exactive	35	yes	AT5G35360	Symbols: CAC2 | acetyl Co-enzyme a carboxylase biotin carboxylase subunit | chr5:13584300-13588268 FORWARD LENGTH=537	534	58350	13	11	30.2	537	4714	1	1	1	697.377	1392.74	2	1392.74	-0.001	427	439	0	39.17	35	0.0042	R	ITSYLPSGGPFVR	M
1	RBR1	NGSrhino	Q Exactive	35	yes	AT5G35360	Symbols: CAC2 | acetyl Co-enzyme a carboxylase biotin carboxylase subunit | chr5:13584300-13588268 FORWARD LENGTH=537	534	58350	13	11	30.2	537	6691	1	1	1	826.413	1650.81	2	1650.81	0.0003	169	183	0	64.45	36	1.6e-05	R	DHGINFIGPNPDSIR	V
1	RBR1	NGSrhino	Q Exactive	35	yes	AT5G35360	Symbols: CAC2 | acetyl Co-enzyme a carboxylase biotin carboxylase subunit | chr5:13584300-13588268 FORWARD LENGTH=537	534	58350	13	11	30.2	537	7044	1	1	1	860.942	1719.87	2	1719.87	0.0011	516	530	0	99.23	36	5.4e-09	K	HEEELAEPQEIVAVK	D
1	RBR1	NGSrhino	Q Exactive	35	yes	AT5G35360	Symbols: CAC2 | acetyl Co-enzyme a carboxylase biotin carboxylase subunit | chr5:13584300-13588268 FORWARD LENGTH=537	534	58350	13	11	30.2	537	8686	1	1	1	658.019	1971.03	3	1971.03	0.003	478	495	0	66.65	34	6.1e-06	R	ALNDTIITGVPTTINYHK	L	Deamidated (NQ)	0.002000000000000000.0
1	RBR1	NGSrhino	Q Exactive	35	yes	AT5G35360	Symbols: CAC2 | acetyl Co-enzyme a carboxylase biotin carboxylase subunit | chr5:13584300-13588268 FORWARD LENGTH=537	534	58350	13	11	30.2	537	10022	1	1	1	1099.06	2196.1	2	2196.1	0.0004	197	218	0	89.46	36	4.7e-08	K	NAGVPTVPGSDGLLQSTEEAVR	V
1	RBR1	NGSrhino	Q Exactive	35	yes	AT5G35360	Symbols: CAC2 | acetyl Co-enzyme a carboxylase biotin carboxylase subunit | chr5:13584300-13588268 FORWARD LENGTH=537	534	58350	13	11	30.2	537	10817	1	1	1	791.376	2371.11	3	2371.1	0.0014	440	460	0	51.62	36	0.00028	R	MDSHVYSDYVVPPSYDSLLGK	L
1	RBR1	NGSrhino	Q Exactive	35	yes	AT5G35360	Symbols: CAC2 | acetyl Co-enzyme a carboxylase biotin carboxylase subunit | chr5:13584300-13588268 FORWARD LENGTH=537	534	58350	13	11	30.2	537	11646	1	1	1	881.124	2640.35	3	2640.35	0.0037	365	386	0	90.6	34	2.4e-08	R	IQVEHPVTEMIYSVDLIEEQIR	V
1	RBR1	NGSrhino	Q Exactive	36	no	AT5G02470	Symbols: DPA | Transcription factor DP | chr5:542562-544423 REVERSE LENGTH=292	526	33018	13	8	28.8	292	346	1	1	1	424.221	846.427	2	846.427	0.0002	180	186	0	51.77	37	0.00041	R	NQEMVVK	T
1	RBR1	NGSrhino	Q Exactive	36	no	AT5G02470	Symbols: DPA | Transcription factor DP | chr5:542562-544423 REVERSE LENGTH=292	526	33018	13	8	28.8	292	1593	1	1	1	505.768	1009.52	2	1009.52	0.0017	16	24	0	45.53	35	0.00094	R	QHPSVSVEK	T
1	RBR1	NGSrhino	Q Exactive	36	no	AT5G02470	Symbols: DPA | Transcription factor DP | chr5:542562-544423 REVERSE LENGTH=292	526	33018	13	8	28.8	292	2388	1	1	1	554.788	1107.56	2	1107.56	0.0026	170	179	0	56.44	36	0.0001	K	VSSLESLMSR	N
1	RBR1	NGSrhino	Q Exactive	36	no	AT5G02470	Symbols: DPA | Transcription factor DP | chr5:542562-544423 REVERSE LENGTH=292	526	33018	13	8	28.8	292	3584	1	1	1	625.287	1248.56	2	1248.56	-0.0019	94	103	0	72.19	34	1.9e-06	K	PLNENEYNEK	N
1	RBR1	NGSrhino	Q Exactive	36	no	AT5G02470	Symbols: DPA | Transcription factor DP | chr5:542562-544423 REVERSE LENGTH=292	526	33018	13	8	28.8	292	4892	1	1	1	710.346	1418.68	2	1418.68	-0.0005	31	43	0	47.57	37	0.0009	K	LIVDDDSEIGSEK	K
1	RBR1	NGSrhino	Q Exactive	36	no	AT5G02470	Symbols: DPA | Transcription factor DP | chr5:542562-544423 REVERSE LENGTH=292	526	33018	13	8	28.8	292	5985	1	1	1	775.903	1549.79	2	1549.79	0.0046	75	88	0	68.87	36	6.1e-06	K	EVADEIISDFATIK	Q
1	RBR1	NGSrhino	Q Exactive	36	no	AT5G02470	Symbols: DPA | Transcription factor DP | chr5:542562-544423 REVERSE LENGTH=292	526	33018	13	8	28.8	292	7689	1	1	1	910.426	1818.84	2	1818.84	-0.0005	89	103	1	93.85	35	1.4e-08	K	QNAEKPLNENEYNEK	N
1	RBR1	NGSrhino	Q Exactive	36	no	AT5G02470	Symbols: DPA | Transcription factor DP | chr5:542562-544423 REVERSE LENGTH=292	526	33018	13	8	28.8	292	7715	1	1	1	912.49	1822.96	2	1822.97	-0.0006	109	124	0	91.9	34	1.7e-08	R	VYDALNVFMALDIIAR	D
1	RBR1	NGSrhino	Q Exactive	37	yes	AT4G16143	Symbols: IMPA-2 | importin alpha isoform 2 | chr4:9134450-9137134 REVERSE LENGTH=535	504	58870	9	8	23.2	535	494	1	1	0	433.759	865.504	2	865.502	0.0014	247	254	0	48.64	29	0.00013	R	PALPALER	L
1	RBR1	NGSrhino	Q Exactive	37	yes	AT4G16143	Symbols: IMPA-2 | importin alpha isoform 2 | chr4:9134450-9137134 REVERSE LENGTH=535	504	58870	9	8	23.2	535	854	1	1	1	456.253	910.492	2	910.491	0.001	125	131	0	52.84	33	0.00011	R	FVEFLTR	E
1	RBR1	NGSrhino	Q Exactive	37	yes	AT4G16143	Symbols: IMPA-2 | importin alpha isoform 2 | chr4:9134450-9137134 REVERSE LENGTH=535	504	58870	9	8	23.2	535	3753	1	1	1	634.372	1266.73	2	1266.73	0.0006	282	293	0	105.13	30	3.2e-10	K	IQSVIEAGVVPR	L
1	RBR1	NGSrhino	Q Exactive	37	yes	AT4G16143	Symbols: IMPA-2 | importin alpha isoform 2 | chr4:9134450-9137134 REVERSE LENGTH=535	504	58870	9	8	23.2	535	6128	1	1	1	526.624	1576.85	3	1576.85	0.0046	110	124	0	55.98	34	6.7e-05	R	SPPIEEVIDAGVVPR	F
1	RBR1	NGSrhino	Q Exactive	37	yes	AT4G16143	Symbols: IMPA-2 | importin alpha isoform 2 | chr4:9134450-9137134 REVERSE LENGTH=535	504	58870	9	8	23.2	535	7687	1	1	1	909.931	1817.85	2	1817.84	0.0036	476	490	0	75.06	35	1.2e-06	K	IENLQSHDNSEIYEK	A
1	RBR1	NGSrhino	Q Exactive	37	yes	AT4G16143	Symbols: IMPA-2 | importin alpha isoform 2 | chr4:9134450-9137134 REVERSE LENGTH=535	504	58870	9	8	23.2	535	10173	1	1	1	743.762	2228.26	3	2228.25	0.0122	199	219	0	33.26	27	0.0025	R	DLVLGQGALIPLLSQLNEHAK	L
1	RBR1	NGSrhino	Q Exactive	37	yes	AT4G16143	Symbols: IMPA-2 | importin alpha isoform 2 | chr4:9134450-9137134 REVERSE LENGTH=535	504	58870	9	8	23.2	535	11100	1	1	1	1235.09	2468.17	2	2468.17	0.0011	453	475	0	164.95	36	1.3e-15	K	VTGNTGDVNFYAQLIDDAEGLEK	I
1	RBR1	NGSrhino	Q Exactive	37	yes	AT4G16143	Symbols: IMPA-2 | importin alpha isoform 2 | chr4:9134450-9137134 REVERSE LENGTH=535	504	58870	9	8	23.2	535	11175	1	1	1	831.79	2492.35	3	2491.34	1.0046	158	180	0	72.87	31	6.6e-07	K	VVIEHGAVPIFVQLLASQSDDVR	E
1	RBR1	NGSrhino	Q Exactive	38	yes	AT5G20890	Symbols: | TCP-1/cpn60 chaperonin family protein | chr5:7087020-7089906 REVERSE LENGTH=527	502	57250	9	8	26	527	3953	1	1	1	643.871	1285.73	2	1285.72	0.003	187	198	0	75.98	33	5.7e-07	K	GSTNLEAIQIIK	K
1	RBR1	NGSrhino	Q Exactive	38	yes	AT5G20890	Symbols: | TCP-1/cpn60 chaperonin family protein | chr5:7087020-7089906 REVERSE LENGTH=527	502	57250	9	8	26	527	3969	1	1	1	645.336	1288.66	2	1288.66	-0.001	343	353	0	71.39	37	3.8e-06	K	LIEEIMIGEDK	L
1	RBR1	NGSrhino	Q Exactive	38	yes	AT5G20890	Symbols: | TCP-1/cpn60 chaperonin family protein | chr5:7087020-7089906 REVERSE LENGTH=527	502	57250	9	8	26	527	4191	1	1	1	440.881	1319.62	3	1319.62	-0.0016	372	383	0	67.15	36	7.8e-06	R	GASHHVLDEAER	S
1	RBR1	NGSrhino	Q Exactive	38	yes	AT5G20890	Symbols: | TCP-1/cpn60 chaperonin family protein | chr5:7087020-7089906 REVERSE LENGTH=527	502	57250	9	8	26	527	4742	1	1	1	699.844	1397.67	2	1397.67	0.0027	206	217	0	68.74	36	6.1e-06	K	DSFLDEGFILDK	K
1	RBR1	NGSrhino	Q Exactive	38	yes	AT5G20890	Symbols: | TCP-1/cpn60 chaperonin family protein | chr5:7087020-7089906 REVERSE LENGTH=527	502	57250	9	8	26	527	5532	1	1	1	744.394	1486.77	2	1486.77	0.0068	401	414	0	58.07	36	7.4e-05	R	VLLGGGWPEMVMAK	E
1	RBR1	NGSrhino	Q Exactive	38	yes	AT5G20890	Symbols: | TCP-1/cpn60 chaperonin family protein | chr5:7087020-7089906 REVERSE LENGTH=527	502	57250	9	8	26	527	10328	1	1	1	1136.59	2271.16	2	2271.16	0.0008	85	106	0	126.92	35	7.7e-12	K	VQDDEVGDGTTSVVVLAGELLR	E
1	RBR1	NGSrhino	Q Exactive	38	yes	AT5G20890	Symbols: | TCP-1/cpn60 chaperonin family protein | chr5:7087020-7089906 REVERSE LENGTH=527	502	57250	9	8	26	527	11254	1	1	1	841.468	2521.38	3	2521.38	0.0085	437	461	0	118.32	28	1.1e-11	R	ALVAIPTTIADNAGLDSAELVAQLR	A
1	RBR1	NGSrhino	Q Exactive	38	yes	AT5G20890	Symbols: | TCP-1/cpn60 chaperonin family protein | chr5:7087020-7089906 REVERSE LENGTH=527	502	57250	9	8	26	527	13135	1	1	1	1108.22	3321.65	3	3320.62	1.0261	289	317	0	99.32	34	3.3e-09	R	QLIYNFPEELFADAGILAIEHADFEGIER	L	Deamidated (NQ)	0.00002000000000000000000000000.0
1	RBR1	NGSrhino	Q Exactive	39	yes	AT5G08670	Symbols: | ATP synthase alpha/beta family protein | chr5:2818395-2821149 REVERSE LENGTH=556	495	59594	9	7	19.4	556	4715	1	1	1	697.412	1392.81	2	1392.81	0.0001	150	163	0	40.42	27	0.00056	K	VLNTGAPITVPVGR	A
1	RBR1	NGSrhino	Q Exactive	39	yes	AT5G08670	Symbols: | ATP synthase alpha/beta family protein | chr5:2818395-2821149 REVERSE LENGTH=556	495	59594	9	7	19.4	556	4945	1	1	1	713.393	1424.77	2	1424.77	0.0052	309	321	0	83.05	34	1.3e-07	R	VGLTGLTVAEYFR	D
1	RBR1	NGSrhino	Q Exactive	39	yes	AT5G08670	Symbols: | ATP synthase alpha/beta family protein | chr5:2818395-2821149 REVERSE LENGTH=556	495	59594	9	7	19.4	556	5002	1	1	1	717.865	1433.72	2	1433.71	0.0009	513	525	0	77.11	37	1e-06	K	ENINSFQGLLDGK	Y
1	RBR1	NGSrhino	Q Exactive	39	yes	AT5G08670	Symbols: | ATP synthase alpha/beta family protein | chr5:2818395-2821149 REVERSE LENGTH=556	495	59594	9	7	19.4	556	5232	1	1	1	729.422	1456.83	2	1456.83	-0.0026	238	250	0	65.81	31	3.6e-06	K	TVLIMELINNVAK	A
1	RBR1	NGSrhino	Q Exactive	39	yes	AT5G08670	Symbols: | ATP synthase alpha/beta family protein | chr5:2818395-2821149 REVERSE LENGTH=556	495	59594	9	7	19.4	556	7915	1	1	1	622.318	1863.93	3	1863.94	-0.0045	322	337	0	89.05	36	5.4e-08	R	DAEGQDVLLFIDNIFR	F
1	RBR1	NGSrhino	Q Exactive	39	yes	AT5G08670	Symbols: | ATP synthase alpha/beta family protein | chr5:2818395-2821149 REVERSE LENGTH=556	495	59594	9	7	19.4	556	8840	1	1	1	998.555	1995.1	2	1995.09	0.0073	194	213	0	74.47	32	6.3e-07	R	DAPALVDLATGQEILATGIK	V
1	RBR1	NGSrhino	Q Exactive	39	yes	AT5G08670	Symbols: | ATP synthase alpha/beta family protein | chr5:2818395-2821149 REVERSE LENGTH=556	495	59594	9	7	19.4	556	9596	1	1	1	1066.53	2131.04	2	2131.04	0.0012	460	478	0	97.9	36	7.3e-09	K	NLQDIIAILGMDELSEDDK	L
1	RBR1	NGSrhino	Q Exactive	40	yes	AT1G52670	Symbols: | Single hybrid motif superfamily protein | chr1:19615119-19617420 REVERSE LENGTH=274	491	29556	9	5	32.8	274	3377	1	1	1	613.831	1225.65	2	1225.65	-0.0012	80	90	0	54.49	34	0.0001	K	STVVNTHLMPK	S
1	RBR1	NGSrhino	Q Exactive	40	yes	AT1G52670	Symbols: | Single hybrid motif superfamily protein | chr1:19615119-19617420 REVERSE LENGTH=274	491	29556	9	5	32.8	274	6046	1	1	1	781.892	1561.77	2	1561.77	-0.0005	165	179	1	63.62	37	2.3e-05	K	TSSSSADRPQTLANK	A
1	RBR1	NGSrhino	Q Exactive	40	yes	AT1G52670	Symbols: | Single hybrid motif superfamily protein | chr1:19615119-19617420 REVERSE LENGTH=274	491	29556	9	5	32.8	274	8319	1	1	1	968.023	1934.03	2	1934.03	0.0055	180	197	0	94.53	33	8.2e-09	K	AADQGLVILQSPTVGYFR	R
1	RBR1	NGSrhino	Q Exactive	40	yes	AT1G52670	Symbols: | Single hybrid motif superfamily protein | chr1:19615119-19617420 REVERSE LENGTH=274	491	29556	9	5	32.8	274	10981	1	1	1	1216.13	2430.24	2	2430.23	0.0076	249	271	0	81.17	34	2.4e-07	R	EDGEPVGYNDALITVLPSFPGIK	K
1	RBR1	NGSrhino	Q Exactive	40	yes	AT1G52670	Symbols: | Single hybrid motif superfamily protein | chr1:19615119-19617420 REVERSE LENGTH=274	491	29556	9	5	32.8	274	11145	1	1	1	1242.62	2483.22	2	2483.22	-0.0012	91	113	0	145.62	36	1.1e-13	K	SSEVEALISEITDSSSIAEFELK	L
1	RBR1	NGSrhino	Q Exactive	41	yes	AT1G33120	Symbols: | Ribosomal protein L6 family | chr1:12010986-12012223 FORWARD LENGTH=194	488	22004	10	8	48.5	194	1357	1	1	1	491.244	980.473	2	980.472	0.0014	60	67	0	43.74	36	0.0019	K	IDSWFGTR	K
1	RBR1	NGSrhino	Q Exactive	41	yes	AT1G33120	Symbols: | Ribosomal protein L6 family | chr1:12010986-12012223 FORWARD LENGTH=194	488	22004	10	8	48.5	194	2898	1	1	1	585.806	1169.6	2	1169.6	0.0007	178	187	0	57.46	35	5.8e-05	K	FLDGIYVSEK	S
1	RBR1	NGSrhino	Q Exactive	41	yes	AT1G33120	Symbols: | Ribosomal protein L6 family | chr1:12010986-12012223 FORWARD LENGTH=194	488	22004	10	8	48.5	194	3412	1	1	1	616.339	1230.66	2	1230.66	-0.0001	129	139	0	83.23	36	2.1e-07	K	VEMLDGVTIVR	S
1	RBR1	NGSrhino	Q Exactive	41	yes	AT1G33120	Symbols: | Ribosomal protein L6 family | chr1:12010986-12012223 FORWARD LENGTH=194	488	22004	10	8	48.5	194	3518	1	1	1	620.857	1239.7	2	1239.7	0.0023	40	49	0	74.6	32	5.5e-07	K	HLNLDFQLIK	D
1	RBR1	NGSrhino	Q Exactive	41	yes	AT1G33120	Symbols: | Ribosomal protein L6 family | chr1:12010986-12012223 FORWARD LENGTH=194	488	22004	10	8	48.5	194	6159	1	1	1	791.93	1581.84	2	1581.85	-0.0026	75	89	0	100.12	33	2.4e-09	R	TALSHVDNLISGVTR	G
1	RBR1	NGSrhino	Q Exactive	41	yes	AT1G33120	Symbols: | Ribosomal protein L6 family | chr1:12010986-12012223 FORWARD LENGTH=194	488	22004	10	8	48.5	194	7419	1	1	1	896.953	1791.89	2	1791.89	-0.0031	97	113	0	87.83	36	8.2e-08	R	FVYAHFPINASIGGDGK	S
1	RBR1	NGSrhino	Q Exactive	41	yes	AT1G33120	Symbols: | Ribosomal protein L6 family | chr1:12010986-12012223 FORWARD LENGTH=194	488	22004	10	8	48.5	194	7858	1	1	1	925.476	1848.94	2	1848.94	-0.0016	3	19	0	71.01	36	3.2e-06	K	TILSSETMDIPDSVTIK	V
1	RBR1	NGSrhino	Q Exactive	41	yes	AT1G33120	Symbols: | Ribosomal protein L6 family | chr1:12010986-12012223 FORWARD LENGTH=194	488	22004	10	8	48.5	194	7928	1	1	1	623.335	1866.98	3	1866.98	-0.0019	40	55	1	79.38	34	3.2e-07	K	HLNLDFQLIKDPETGK	K
1	RBR1	NGSrhino	Q Exactive	42	yes	AT4G37910	Symbols: mtHsc70-1 | mitochondrial heat shock protein 70-1 | chr4:17825368-17828099 REVERSE LENGTH=682	481	73030	13	11	18.9	682	535	1	1	1	436.254	870.493	2	870.492	0.0004	210	217	0	48.17	33	0.00036	K	IAGLDVQR	I
1	RBR1	NGSrhino	Q Exactive	42	yes	AT4G37910	Symbols: mtHsc70-1 | mitochondrial heat shock protein 70-1 | chr4:17825368-17828099 REVERSE LENGTH=682	481	73030	13	11	18.9	682	1255	1	1	1	484.288	966.561	2	966.561	0.0001	339	346	0	31.9	30	0.0077	K	HLNITLTR	S
1	RBR1	NGSrhino	Q Exactive	42	yes	AT4G37910	Symbols: mtHsc70-1 | mitochondrial heat shock protein 70-1 | chr4:17825368-17828099 REVERSE LENGTH=682	481	73030	13	11	18.9	682	1317	1	1	1	487.75	973.485	2	973.483	0.0025	76	84	0	43.25	36	0.0021	R	VIENAEGSR	T
1	RBR1	NGSrhino	Q Exactive	42	yes	AT4G37910	Symbols: mtHsc70-1 | mitochondrial heat shock protein 70-1 | chr4:17825368-17828099 REVERSE LENGTH=682	481	73030	13	11	18.9	682	1360	1	0	0	491.249	980.484	2	980.481	0.0022	175	183	0	74.21	36	1.8e-06	K	ETAEAYLGK	S
1	RBR1	NGSrhino	Q Exactive	42	yes	AT4G37910	Symbols: mtHsc70-1 | mitochondrial heat shock protein 70-1 | chr4:17825368-17828099 REVERSE LENGTH=682	481	73030	13	11	18.9	682	1378	1	0	0	492.79	983.566	2	983.565	0.0005	96	105	0	50.11	30	0.00012	K	GELLVGTPAK	R
1	RBR1	NGSrhino	Q Exactive	42	yes	AT4G37910	Symbols: mtHsc70-1 | mitochondrial heat shock protein 70-1 | chr4:17825368-17828099 REVERSE LENGTH=682	481	73030	13	11	18.9	682	3577	1	1	1	624.848	1247.68	2	1247.68	0.005	393	403	0	67.57	35	6.2e-06	K	VQEIVSEIFGK	S
1	RBR1	NGSrhino	Q Exactive	42	yes	AT4G37910	Symbols: mtHsc70-1 | mitochondrial heat shock protein 70-1 | chr4:17825368-17828099 REVERSE LENGTH=682	481	73030	13	11	18.9	682	3582	1	1	1	625.285	1248.56	2	1248.56	-0.0026	547	558	0	82.22	34	1.8e-07	R	SSGGLSDDEINR	M
1	RBR1	NGSrhino	Q Exactive	42	yes	AT4G37910	Symbols: mtHsc70-1 | mitochondrial heat shock protein 70-1 | chr4:17825368-17828099 REVERSE LENGTH=682	481	73030	13	11	18.9	682	4234	1	1	1	664.322	1326.63	2	1326.63	-0.0001	581	592	0	62.45	36	2.3e-05	R	NSADTTIYSVEK	S
1	RBR1	NGSrhino	Q Exactive	42	yes	AT4G37910	Symbols: mtHsc70-1 | mitochondrial heat shock protein 70-1 | chr4:17825368-17828099 REVERSE LENGTH=682	481	73030	13	11	18.9	682	4879	1	0	0	709.371	1416.73	2	1416.73	-0.0003	377	389	0	41.58	36	0.0034	K	EVDEVLLVGGMTR	V
1	RBR1	NGSrhino	Q Exactive	42	yes	AT4G37910	Symbols: mtHsc70-1 | mitochondrial heat shock protein 70-1 | chr4:17825368-17828099 REVERSE LENGTH=682	481	73030	13	11	18.9	682	7610	1	1	1	907.479	1812.94	2	1812.95	-0.0027	601	617	0	102.45	35	1.9e-09	K	IPAEIASEIETAVSDLR	T
1	RBR1	NGSrhino	Q Exactive	42	yes	AT4G37910	Symbols: mtHsc70-1 | mitochondrial heat shock protein 70-1 | chr4:17825368-17828099 REVERSE LENGTH=682	481	73030	13	11	18.9	682	8336	1	0	1	647.008	1938	3	1938	0.0029	408	427	0	86.88	35	7.1e-08	K	GVNPDEAVAMGAAIQGGILR	G
1	RBR1	NGSrhino	Q Exactive	43	yes	AT2G46520	Symbols: | cellular apoptosis susceptibility protein, putative / importin-alpha re-exporter, putative | chr2:19096867-19099785 FORWARD LENGTH=972	474	108588	10	10	14.9	972	420	1	1	1	429.234	856.454	2	856.456	-0.0016	61	68	0	34.78	33	0.0072	R	HAAAVNFK	N
1	RBR1	NGSrhino	Q Exactive	43	yes	AT2G46520	Symbols: | cellular apoptosis susceptibility protein, putative / importin-alpha re-exporter, putative | chr2:19096867-19099785 FORWARD LENGTH=972	474	108588	10	10	14.9	972	1678	1	1	1	511.284	1020.55	2	1020.55	0.0038	172	180	0	53.13	36	0.0002	R	TDALFVDLK	Y
1	RBR1	NGSrhino	Q Exactive	43	yes	AT2G46520	Symbols: | cellular apoptosis susceptibility protein, putative / importin-alpha re-exporter, putative | chr2:19096867-19099785 FORWARD LENGTH=972	474	108588	10	10	14.9	972	2588	1	1	1	567.331	1132.65	2	1132.65	-0.0012	729	738	0	56.91	32	3.3e-05	R	LSQVLGIFEK	L
1	RBR1	NGSrhino	Q Exactive	43	yes	AT2G46520	Symbols: | cellular apoptosis susceptibility protein, putative / importin-alpha re-exporter, putative | chr2:19096867-19099785 FORWARD LENGTH=972	474	108588	10	10	14.9	972	2976	1	1	1	590.789	1179.56	2	1179.56	-0.0005	719	728	0	54.43	36	0.00017	K	APHEVTQENR	L
1	RBR1	NGSrhino	Q Exactive	43	yes	AT2G46520	Symbols: | cellular apoptosis susceptibility protein, putative / importin-alpha re-exporter, putative | chr2:19096867-19099785 FORWARD LENGTH=972	474	108588	10	10	14.9	972	5527	1	1	1	743.93	1485.85	2	1485.84	0.006	109	122	0	44.6	31	0.00053	R	IQSQLSEALTVIGK	H
1	RBR1	NGSrhino	Q Exactive	43	yes	AT2G46520	Symbols: | cellular apoptosis susceptibility protein, putative / importin-alpha re-exporter, putative | chr2:19096867-19099785 FORWARD LENGTH=972	474	108588	10	10	14.9	972	7205	1	1	1	874.455	1746.9	2	1746.89	0.0056	32	48	0	140.55	36	3.9e-13	R	ALSDAADQANYGLAVLR	L
1	RBR1	NGSrhino	Q Exactive	43	yes	AT2G46520	Symbols: | cellular apoptosis susceptibility protein, putative / importin-alpha re-exporter, putative | chr2:19096867-19099785 FORWARD LENGTH=972	474	108588	10	10	14.9	972	7944	1	1	1	624.999	1871.98	3	1871.98	-0.0012	870	885	1	52.64	35	0.00018	K	MLDSIVTLVSRPEQER	V
1	RBR1	NGSrhino	Q Exactive	43	yes	AT2G46520	Symbols: | cellular apoptosis susceptibility protein, putative / importin-alpha re-exporter, putative | chr2:19096867-19099785 FORWARD LENGTH=972	474	108588	10	10	14.9	972	8947	1	1	1	673.369	2017.09	3	2017.08	0.0069	615	631	0	82.63	32	9.5e-08	K	NPIFNHYLFESVAVLVR	R
1	RBR1	NGSrhino	Q Exactive	43	yes	AT2G46520	Symbols: | cellular apoptosis susceptibility protein, putative / importin-alpha re-exporter, putative | chr2:19096867-19099785 FORWARD LENGTH=972	474	108588	10	10	14.9	972	9331	1	1	1	1038.49	2074.96	2	2074.96	0.0085	363	378	0	90.43	36	3.7e-08	R	VEDEEIFEMNYIEFIR	R
1	RBR1	NGSrhino	Q Exactive	43	yes	AT2G46520	Symbols: | cellular apoptosis susceptibility protein, putative / importin-alpha re-exporter, putative | chr2:19096867-19099785 FORWARD LENGTH=972	474	108588	10	10	14.9	972	12649	1	1	1	992.855	2975.54	3	2974.54	1.0032	449	476	0	101.49	33	1.4e-09	K	AGGASVSTDLIDVQNFFANIILPELQSR	D
1	RBR1	NGSrhino	Q Exactive	44	yes	AT5G36230	Symbols: | ARM repeat superfamily protein | chr5:14273519-14276773 FORWARD LENGTH=411	454	47186	9	8	31.1	411	3763	1	1	1	634.813	1267.61	2	1267.6	0.0062	51	61	0	44.48	36	0.0017	K	SIESSDLNFTR	Y
1	RBR1	NGSrhino	Q Exactive	44	yes	AT5G36230	Symbols: | ARM repeat superfamily protein | chr5:14273519-14276773 FORWARD LENGTH=411	454	47186	9	8	31.1	411	4440	1	1	0	680.401	1358.79	2	1358.78	0.0061	101	112	0	54.22	30	4.6e-05	R	EAILPSVVYIQK	I
1	RBR1	NGSrhino	Q Exactive	44	yes	AT5G36230	Symbols: | ARM repeat superfamily protein | chr5:14273519-14276773 FORWARD LENGTH=411	454	47186	9	8	31.1	411	4522	1	1	1	686.879	1371.74	2	1371.74	0.0002	179	190	0	74.72	35	1.1e-06	K	GIVLSFVTDFFK	E
1	RBR1	NGSrhino	Q Exactive	44	yes	AT5G36230	Symbols: | ARM repeat superfamily protein | chr5:14273519-14276773 FORWARD LENGTH=411	454	47186	9	8	31.1	411	6709	1	1	0	827.41	1652.81	2	1652.8	0.0017	131	143	0	76.55	36	1e-06	R	FLQSLELFEENER	K
1	RBR1	NGSrhino	Q Exactive	44	yes	AT5G36230	Symbols: | ARM repeat superfamily protein | chr5:14273519-14276773 FORWARD LENGTH=411	454	47186	9	8	31.1	411	6892	1	1	1	845.917	1689.82	2	1689.82	0.0002	294	308	0	94.8	36	1.6e-08	R	VVWDGLMDAVQWSGK	N
1	RBR1	NGSrhino	Q Exactive	44	yes	AT5G36230	Symbols: | ARM repeat superfamily protein | chr5:14273519-14276773 FORWARD LENGTH=411	454	47186	9	8	31.1	411	8164	1	1	1	636.006	1905	3	1905.01	-0.0118	191	206	0	86.27	35	8e-08	K	EYLVENSLEDLISILR	R
1	RBR1	NGSrhino	Q Exactive	44	yes	AT5G36230	Symbols: | ARM repeat superfamily protein | chr5:14273519-14276773 FORWARD LENGTH=411	454	47186	9	8	31.1	411	10124	1	1	1	1110.57	2219.12	2	2219.13	-0.0046	365	382	0	97.68	35	6.8e-09	R	SLYELDVLAEDTILHWFR	K
1	RBR1	NGSrhino	Q Exactive	44	yes	AT5G36230	Symbols: | ARM repeat superfamily protein | chr5:14273519-14276773 FORWARD LENGTH=411	454	47186	9	8	31.1	411	13030	1	1	1	1079.88	3236.63	3	3236.64	-0.0055	20	50	0	47.45	34	0.00048	R	NIAAPLDPAAFSDAVVQIYHDNAGDLELVAK	S
1	RBR1	NGSrhino	Q Exactive	45	yes	AT5G58290	Symbols: RPT3 | regulatory particle triple-A ATPase 3 | chr5:23569155-23571116 FORWARD LENGTH=408	453	45723	10	8	30.4	408	1352	1	1	1	490.723	979.432	2	979.436	-0.0036	265	273	0	48.45	33	0.00035	R	FDAQTGADR	E
1	RBR1	NGSrhino	Q Exactive	45	yes	AT5G58290	Symbols: RPT3 | regulatory particle triple-A ATPase 3 | chr5:23569155-23571116 FORWARD LENGTH=408	453	45723	10	8	30.4	408	1390	1	1	1	493.769	985.524	2	985.523	0.0002	321	328	0	46.58	34	0.00064	K	IEFPLPDR	R
1	RBR1	NGSrhino	Q Exactive	45	yes	AT5G58290	Symbols: RPT3 | regulatory particle triple-A ATPase 3 | chr5:23569155-23571116 FORWARD LENGTH=408	453	45723	10	8	30.4	408	2797	1	1	0	579.831	1157.65	2	1157.64	0.0035	191	202	0	39.98	35	0.0035	R	GVLLYGPPGTGK	T
1	RBR1	NGSrhino	Q Exactive	45	yes	AT5G58290	Symbols: RPT3 | regulatory particle triple-A ATPase 3 | chr5:23569155-23571116 FORWARD LENGTH=408	453	45723	10	8	30.4	408	3968	1	1	1	645.308	1288.6	2	1288.6	0.0042	399	408	1	60.35	35	3e-05	K	KPDTDFEFYK	-
1	RBR1	NGSrhino	Q Exactive	45	yes	AT5G58290	Symbols: RPT3 | regulatory particle triple-A ATPase 3 | chr5:23569155-23571116 FORWARD LENGTH=408	453	45723	10	8	30.4	408	6830	1	1	1	560.299	1677.87	3	1677.87	0.0021	169	182	0	44.99	35	0.0013	R	EAVELPLTHHELYK	Q
1	RBR1	NGSrhino	Q Exactive	45	yes	AT5G58290	Symbols: RPT3 | regulatory particle triple-A ATPase 3 | chr5:23569155-23571116 FORWARD LENGTH=408	453	45723	10	8	30.4	408	8982	1	1	1	677.025	2028.05	3	2028.05	0.0007	246	264	0	110.53	35	2.9e-10	K	ENAPAIIFIDEVDAIATAR	F
1	RBR1	NGSrhino	Q Exactive	45	yes	AT5G58290	Symbols: RPT3 | regulatory particle triple-A ATPase 3 | chr5:23569155-23571116 FORWARD LENGTH=408	453	45723	10	8	30.4	408	10060	1	1	1	736.709	2207.11	3	2207.1	0.0089	278	296	0	103.8	35	1.6e-09	R	ILMELLNQMDGFDQTVNVK	V
1	RBR1	NGSrhino	Q Exactive	45	yes	AT5G58290	Symbols: RPT3 | regulatory particle triple-A ATPase 3 | chr5:23569155-23571116 FORWARD LENGTH=408	453	45723	10	8	30.4	408	13454	1	1	1	1206.6	3616.76	3	3615.77	0.9942	72	104	0	64.61	34	9.3e-06	R	IQSVPLVIGQFMEMVDQNNGIVGSTTGSNYYVR	I
1	RBR1	NGSrhino	Q Exactive	46	yes	AT5G28540	Symbols: BIP1 | heat shock protein 70 (Hsp 70) family protein | chr5:10540665-10543274 REVERSE LENGTH=669	452	73584	10	9	17.3	669	1360	1	0	0	491.249	980.484	2	980.481	0.0022	161	169	0	74.21	36	1.8e-06	K	ETAEAYLGK	K
1	RBR1	NGSrhino	Q Exactive	46	yes	AT5G28540	Symbols: BIP1 | heat shock protein 70 (Hsp 70) family protein | chr5:10540665-10543274 REVERSE LENGTH=669	452	73584	10	9	17.3	669	1420	1	1	1	495.249	988.483	2	988.482	0.0009	541	548	0	66.41	36	9.3e-06	R	LSQEEIDR	M
1	RBR1	NGSrhino	Q Exactive	46	yes	AT5G28540	Symbols: BIP1 | heat shock protein 70 (Hsp 70) family protein | chr5:10540665-10543274 REVERSE LENGTH=669	452	73584	10	9	17.3	669	1703	1	1	1	513.278	1024.54	2	1024.54	-0.0007	304	312	0	56.47	34	6.5e-05	R	ALSSQHQVR	V
1	RBR1	NGSrhino	Q Exactive	46	yes	AT5G28540	Symbols: BIP1 | heat shock protein 70 (Hsp 70) family protein | chr5:10540665-10543274 REVERSE LENGTH=669	452	73584	10	9	17.3	669	4030	1	1	1	648.814	1295.61	2	1295.61	-0.0004	333	342	0	45.68	36	0.0012	R	FEELNNDLFR	K
1	RBR1	NGSrhino	Q Exactive	46	yes	AT5G28540	Symbols: BIP1 | heat shock protein 70 (Hsp 70) family protein | chr5:10540665-10543274 REVERSE LENGTH=669	452	73584	10	9	17.3	669	5579	1	1	1	747.866	1493.72	2	1493.72	0.002	68	80	0	51.33	36	0.00036	R	ITPSWVGFTDSER	L
1	RBR1	NGSrhino	Q Exactive	46	yes	AT5G28540	Symbols: BIP1 | heat shock protein 70 (Hsp 70) family protein | chr5:10540665-10543274 REVERSE LENGTH=669	452	73584	10	9	17.3	669	6062	1	1	1	782.919	1563.82	2	1563.82	0.0015	145	158	0	68.19	36	6.3e-06	K	VFSPEEISAMILTK	M
1	RBR1	NGSrhino	Q Exactive	46	yes	AT5G28540	Symbols: BIP1 | heat shock protein 70 (Hsp 70) family protein | chr5:10540665-10543274 REVERSE LENGTH=669	452	73584	10	9	17.3	669	6741	1	0	0	830.453	1658.89	2	1658.89	0.0041	204	219	0	103.17	34	1.4e-09	R	IINEPTAAAIAYGLDK	K
1	RBR1	NGSrhino	Q Exactive	46	yes	AT5G28540	Symbols: BIP1 | heat shock protein 70 (Hsp 70) family protein | chr5:10540665-10543274 REVERSE LENGTH=669	452	73584	10	9	17.3	669	6958	1	1	1	852.889	1703.76	2	1703.76	-0.0011	608	621	0	59.28	34	3.6e-05	K	EALEWLDENQNSEK	E
1	RBR1	NGSrhino	Q Exactive	46	yes	AT5G28540	Symbols: BIP1 | heat shock protein 70 (Hsp 70) family protein | chr5:10540665-10543274 REVERSE LENGTH=669	452	73584	10	9	17.3	669	10811	1	1	1	790.119	2367.34	3	2367.33	0.0028	421	443	0	89.75	27	5.4e-09	K	DILLLDVAPLTLGIETVGGVMTK	L
1	RBR1	NGSrhino	Q Exactive	47	yes	AT5G16390	Symbols: CAC1, CAC1A, BCCP, BCCP1 | chloroplastic acetylcoenzyme A carboxylase 1 | chr5:5361098-5363020 REVERSE LENGTH=280	445	29594	6	3	17.5	280	1446	1	1	1	496.754	991.493	2	991.493	-0.0004	67	77	0	64.71	37	2.1e-05	K	VSTGASSNAAK	V
1	RBR1	NGSrhino	Q Exactive	47	yes	AT5G16390	Symbols: CAC1, CAC1A, BCCP, BCCP1 | chloroplastic acetylcoenzyme A carboxylase 1 | chr5:5361098-5363020 REVERSE LENGTH=280	445	29594	6	3	17.5	280	2644	1	1	1	570.308	1138.6	2	1138.6	-0.0005	217	227	0	47.73	33	0.00041	R	SPAPGEPPFIK	V
1	RBR1	NGSrhino	Q Exactive	47	yes	AT5G16390	Symbols: CAC1, CAC1A, BCCP, BCCP1 | chloroplastic acetylcoenzyme A carboxylase 1 | chr5:5361098-5363020 REVERSE LENGTH=280	445	29594	6	3	17.5	280	12453	1	1	1	1442.22	2882.43	2	2882.43	0.0004	94	120	0	158.46	35	5e-15	K	ESSASSPELATEESISEFLTQVTTLVK	L
1	RBR1	NGSrhino	Q Exactive	48	yes	AT1G43170	Symbols: ARP1, emb2207, RPL3A, RP1 | ribosomal protein 1 | chr1:16266992-16268631 FORWARD LENGTH=389	444	44531	13	11	32.4	389	617	1	1	1	440.73	879.446	2	879.445	0.0006	228	235	0	42.28	37	0.0031	K	GYEGVVTR	W
1	RBR1	NGSrhino	Q Exactive	48	yes	AT1G43170	Symbols: ARP1, emb2207, RPL3A, RP1 | ribosomal protein 1 | chr1:16266992-16268631 FORWARD LENGTH=389	444	44531	13	11	32.4	389	645	1	1	1	442.742	883.469	2	883.47	-0.0008	51	58	0	72.5	32	1.1e-06	K	AGMTHIVR	E
1	RBR1	NGSrhino	Q Exactive	48	yes	AT1G43170	Symbols: ARP1, emb2207, RPL3A, RP1 | ribosomal protein 1 | chr1:16266992-16268631 FORWARD LENGTH=389	444	44531	13	11	32.4	389	1041	1	1	1	469.283	936.55	2	936.551	-0.0001	162	169	0	34.31	30	0.0038	R	VLAHTQIR	K
1	RBR1	NGSrhino	Q Exactive	48	yes	AT1G43170	Symbols: ARP1, emb2207, RPL3A, RP1 | ribosomal protein 1 | chr1:16266992-16268631 FORWARD LENGTH=389	444	44531	13	11	32.4	389	1373	1	1	1	492.276	982.537	2	982.535	0.0017	11	19	0	65.24	34	7.9e-06	R	HGSLGFLPR	K
1	RBR1	NGSrhino	Q Exactive	48	yes	AT1G43170	Symbols: ARP1, emb2207, RPL3A, RP1 | ribosomal protein 1 | chr1:16266992-16268631 FORWARD LENGTH=389	444	44531	13	11	32.4	389	3423	1	1	1	617.326	1232.64	2	1232.63	0.0048	215	225	0	43.42	37	0.0026	K	DEMIDIIGVTK	G
1	RBR1	NGSrhino	Q Exactive	48	yes	AT1G43170	Symbols: ARP1, emb2207, RPL3A, RP1 | ribosomal protein 1 | chr1:16266992-16268631 FORWARD LENGTH=389	444	44531	13	11	32.4	389	3611	1	1	1	626.799	1251.58	2	1251.58	0.0018	195	204	0	63.27	36	1.9e-05	K	VDFAYSFFEK	Q
1	RBR1	NGSrhino	Q Exactive	48	yes	AT1G43170	Symbols: ARP1, emb2207, RPL3A, RP1 | ribosomal protein 1 | chr1:16266992-16268631 FORWARD LENGTH=389	444	44531	13	11	32.4	389	4195	1	1	1	440.895	1319.66	3	1319.66	0.0019	362	373	0	63.26	37	2.6e-05	K	FIDTASIFGHGR	F
1	RBR1	NGSrhino	Q Exactive	48	yes	AT1G43170	Symbols: ARP1, emb2207, RPL3A, RP1 | ribosomal protein 1 | chr1:16266992-16268631 FORWARD LENGTH=389	444	44531	13	11	32.4	389	6144	1	1	1	527.572	1579.69	3	1579.69	-0.0004	291	304	0	65.63	33	6.5e-06	K	VGTEAHTAMTEYDR	T
1	RBR1	NGSrhino	Q Exactive	48	yes	AT1G43170	Symbols: ARP1, emb2207, RPL3A, RP1 | ribosomal protein 1 | chr1:16266992-16268631 FORWARD LENGTH=389	444	44531	13	11	32.4	389	6382	1	1	1	809.408	1616.8	2	1616.8	-0.0009	308	322	0	66.48	36	1.1e-05	K	DVTPMGGFPHYGIVK	D
1	RBR1	NGSrhino	Q Exactive	48	yes	AT1G43170	Symbols: ARP1, emb2207, RPL3A, RP1 | ribosomal protein 1 | chr1:16266992-16268631 FORWARD LENGTH=389	444	44531	13	11	32.4	389	7178	1	1	1	871.934	1741.85	2	1741.85	0.0045	179	194	0	64.47	36	1.6e-05	K	AHMMEIQINGGTIAQK	V	Deamidated (NQ)	0.0000000020000000.0
1	RBR1	NGSrhino	Q Exactive	48	yes	AT1G43170	Symbols: ARP1, emb2207, RPL3A, RP1 | ribosomal protein 1 | chr1:16266992-16268631 FORWARD LENGTH=389	444	44531	13	11	32.4	389	7305	1	1	1	884.954	1767.89	2	1767.89	0.0027	101	115	0	105.81	36	1e-09	R	SLNTVWAQHLSEEVR	R
1	RBR1	NGSrhino	Q Exactive	49	yes	AT4G24280	Symbols: cpHsc70-1 | chloroplast heat shock protein 70-1 | chr4:12590094-12593437 FORWARD LENGTH=718	440	76461	13	13	20.1	718	516	1	1	0	435.258	868.502	2	868.502	0.0001	539	546	0	40.28	30	0.0011	R	GVPQIEVK	F
1	RBR1	NGSrhino	Q Exactive	49	yes	AT4G24280	Symbols: cpHsc70-1 | chloroplast heat shock protein 70-1 | chr4:12590094-12593437 FORWARD LENGTH=718	440	76461	13	13	20.1	718	526	1	1	0	435.774	869.534	2	869.533	0.0005	236	243	0	40.52	29	0.0008	R	IAGLEVLR	I
1	RBR1	NGSrhino	Q Exactive	49	yes	AT4G24280	Symbols: cpHsc70-1 | chloroplast heat shock protein 70-1 | chr4:12590094-12593437 FORWARD LENGTH=718	440	76461	13	13	20.1	718	882	1	1	0	458.248	914.482	2	914.482	-0.0002	389	396	0	47.26	34	0.00049	R	TPVENSLR	D
1	RBR1	NGSrhino	Q Exactive	49	yes	AT4G24280	Symbols: cpHsc70-1 | chloroplast heat shock protein 70-1 | chr4:12590094-12593437 FORWARD LENGTH=718	440	76461	13	13	20.1	718	1666	1	1	1	510.271	1018.53	2	1018.53	-0.0013	647	656	0	59.44	37	6.2e-05	K	IGSGSTQEIK	D
1	RBR1	NGSrhino	Q Exactive	49	yes	AT4G24280	Symbols: cpHsc70-1 | chloroplast heat shock protein 70-1 | chr4:12590094-12593437 FORWARD LENGTH=718	440	76461	13	13	20.1	718	2005	1	1	0	533.793	1065.57	2	1065.57	0.0012	111	120	0	44.11	34	0.0011	R	TTPSVVAYTK	S
1	RBR1	NGSrhino	Q Exactive	49	yes	AT4G24280	Symbols: cpHsc70-1 | chloroplast heat shock protein 70-1 | chr4:12590094-12593437 FORWARD LENGTH=718	440	76461	13	13	20.1	718	2945	1	1	1	589.317	1176.62	2	1176.62	0.002	307	316	0	60.12	36	4.4e-05	R	VVDWLAAEFK	K
1	RBR1	NGSrhino	Q Exactive	49	yes	AT4G24280	Symbols: cpHsc70-1 | chloroplast heat shock protein 70-1 | chr4:12590094-12593437 FORWARD LENGTH=718	440	76461	13	13	20.1	718	3020	1	1	0	593.315	1184.62	2	1184.61	0.0003	100	110	0	70.72	35	2.9e-06	K	PTIVTNAEGQR	T
1	RBR1	NGSrhino	Q Exactive	49	yes	AT4G24280	Symbols: cpHsc70-1 | chloroplast heat shock protein 70-1 | chr4:12590094-12593437 FORWARD LENGTH=718	440	76461	13	13	20.1	718	4346	1	1	0	672.874	1343.73	2	1343.73	0.0045	568	580	0	59.18	35	4.2e-05	K	QDITITGASTLPK	D
1	RBR1	NGSrhino	Q Exactive	49	yes	AT4G24280	Symbols: cpHsc70-1 | chloroplast heat shock protein 70-1 | chr4:12590094-12593437 FORWARD LENGTH=718	440	76461	13	13	20.1	718	4530	1	1	0	687.37	1372.73	2	1372.72	0.0053	404	416	0	68.54	36	5.6e-06	K	DIDEVILVGGSTR	I
1	RBR1	NGSrhino	Q Exactive	49	yes	AT4G24280	Symbols: cpHsc70-1 | chloroplast heat shock protein 70-1 | chr4:12590094-12593437 FORWARD LENGTH=718	440	76461	13	13	20.1	718	4591	1	1	0	691.333	1380.65	2	1380.65	-0.0002	608	619	0	64.73	36	1.5e-05	K	NQADSVVYQTEK	Q
1	RBR1	NGSrhino	Q Exactive	49	yes	AT4G24280	Symbols: cpHsc70-1 | chloroplast heat shock protein 70-1 | chr4:12590094-12593437 FORWARD LENGTH=718	440	76461	13	13	20.1	718	5259	1	1	0	731.389	1460.76	2	1460.76	0.0006	185	197	0	80.14	36	4.6e-07	K	QFAAEEISAQVLR	K
1	RBR1	NGSrhino	Q Exactive	49	yes	AT4G24280	Symbols: cpHsc70-1 | chloroplast heat shock protein 70-1 | chr4:12590094-12593437 FORWARD LENGTH=718	440	76461	13	13	20.1	718	6139	1	1	0	790.41	1578.81	2	1578.8	0.0009	133	146	0	69	36	6.2e-06	R	QAVVNPENTFFSVK	R
1	RBR1	NGSrhino	Q Exactive	49	yes	AT4G24280	Symbols: cpHsc70-1 | chloroplast heat shock protein 70-1 | chr4:12590094-12593437 FORWARD LENGTH=718	440	76461	13	13	20.1	718	6146	1	1	0	790.905	1579.79	2	1579.8	-0.0048	214	227	0	60.63	36	4.2e-05	K	AVITVPAYFNDSQR	T
1	RBR1	NGSrhino	Q Exactive	50	yes	AT3G09630	Symbols: | Ribosomal protein L4/L1 family | chr3:2953813-2955444 FORWARD LENGTH=406	438	44674	11	10	33.5	406	230	1	1	1	416.242	830.47	2	830.468	0.0015	327	333	0	42.53	36	0.0024	K	NLNVMLK	L
1	RBR1	NGSrhino	Q Exactive	50	yes	AT3G09630	Symbols: | Ribosomal protein L4/L1 family | chr3:2953813-2955444 FORWARD LENGTH=406	438	44674	11	10	33.5	406	590	1	1	0	439.253	876.492	2	876.493	-0.0014	246	254	0	53.14	34	0.00014	K	LAPGGHLGR	F
1	RBR1	NGSrhino	Q Exactive	50	yes	AT3G09630	Symbols: | Ribosomal protein L4/L1 family | chr3:2953813-2955444 FORWARD LENGTH=406	438	44674	11	10	33.5	406	1659	1	1	1	509.771	1017.53	2	1017.53	-0.001	344	352	0	52.29	37	0.00037	R	MSLLAEAQR	V
1	RBR1	NGSrhino	Q Exactive	50	yes	AT3G09630	Symbols: | Ribosomal protein L4/L1 family | chr3:2953813-2955444 FORWARD LENGTH=406	438	44674	11	10	33.5	406	4287	1	1	1	667.87	1333.73	2	1333.72	0.0015	210	222	1	71.5	34	2.1e-06	R	KGPLVVYGTEGSK	I
1	RBR1	NGSrhino	Q Exactive	50	yes	AT3G09630	Symbols: | Ribosomal protein L4/L1 family | chr3:2953813-2955444 FORWARD LENGTH=406	438	44674	11	10	33.5	406	5102	1	1	0	722.832	1443.65	2	1443.65	0.0003	63	76	0	69.1	33	3e-06	K	AGHQTSAESWGTGR	A
1	RBR1	NGSrhino	Q Exactive	50	yes	AT3G09630	Symbols: | Ribosomal protein L4/L1 family | chr3:2953813-2955444 FORWARD LENGTH=406	438	44674	11	10	33.5	406	6359	1	1	0	807.408	1612.8	2	1612.8	0.002	266	279	1	69.43	36	4.9e-06	K	LESIYGSFEKPSEK	K
1	RBR1	NGSrhino	Q Exactive	50	yes	AT3G09630	Symbols: | Ribosomal protein L4/L1 family | chr3:2953813-2955444 FORWARD LENGTH=406	438	44674	11	10	33.5	406	6787	1	1	1	834.961	1667.91	2	1667.91	-0.0012	298	312	0	60.56	33	2.1e-05	R	IINSDEIQSVVNPIK	K
1	RBR1	NGSrhino	Q Exactive	50	yes	AT3G09630	Symbols: | Ribosomal protein L4/L1 family | chr3:2953813-2955444 FORWARD LENGTH=406	438	44674	11	10	33.5	406	7906	1	1	0	621.36	1861.06	3	1861.06	-0.0031	127	145	0	57.74	27	1e-05	R	HAIVSAIAATAVPALVMAR	G
1	RBR1	NGSrhino	Q Exactive	50	yes	AT3G09630	Symbols: | Ribosomal protein L4/L1 family | chr3:2953813-2955444 FORWARD LENGTH=406	438	44674	11	10	33.5	406	8210	1	1	1	957.41	1912.81	2	1912.8	0.002	385	400	0	110.28	31	1.3e-10	K	TMISDSDYTEFDNFTK	W
1	RBR1	NGSrhino	Q Exactive	50	yes	AT3G09630	Symbols: | Ribosomal protein L4/L1 family | chr3:2953813-2955444 FORWARD LENGTH=406	438	44674	11	10	33.5	406	9823	1	1	0	1078.55	2155.08	2	2155.07	0.007	149	168	0	60.68	36	3.4e-05	K	IENVPEMPLVVSDSAEAVEK	T
1	RBR1	NGSrhino	Q Exactive	51	yes	AT2G02560	Symbols: CAND1, ATCAND1, ETA2, TIP120, HVE | cullin-associated and neddylation dissociated | chr2:690345-697342 FORWARD LENGTH=1219	437	134811	13	11	10.7	1219	149	1	1	1	410.703	819.391	2	819.391	0.0003	612	618	0	56.29	37	0.00013	R	MGNEITR	L
1	RBR1	NGSrhino	Q Exactive	51	yes	AT2G02560	Symbols: CAND1, ATCAND1, ETA2, TIP120, HVE | cullin-associated and neddylation dissociated | chr2:690345-697342 FORWARD LENGTH=1219	437	134811	13	11	10.7	1219	721	1	1	1	448.291	894.567	2	894.565	0.0018	966	973	0	26.4	24	0.0063	K	LVPALQVR	T
1	RBR1	NGSrhino	Q Exactive	51	yes	AT2G02560	Symbols: CAND1, ATCAND1, ETA2, TIP120, HVE | cullin-associated and neddylation dissociated | chr2:690345-697342 FORWARD LENGTH=1219	437	134811	13	11	10.7	1219	924	1	1	1	460.777	919.539	2	919.538	0.0011	488	495	0	59.74	31	1.6e-05	K	IEALVFTK	L
1	RBR1	NGSrhino	Q Exactive	51	yes	AT2G02560	Symbols: CAND1, ATCAND1, ETA2, TIP120, HVE | cullin-associated and neddylation dissociated | chr2:690345-697342 FORWARD LENGTH=1219	437	134811	13	11	10.7	1219	2108	1	1	1	541.353	1080.69	2	1080.69	0.0007	730	739	0	28.49	21	0.0021	K	VLPQALTLVK	S
1	RBR1	NGSrhino	Q Exactive	51	yes	AT2G02560	Symbols: CAND1, ATCAND1, ETA2, TIP120, HVE | cullin-associated and neddylation dissociated | chr2:690345-697342 FORWARD LENGTH=1219	437	134811	13	11	10.7	1219	2739	1	1	1	576.805	1151.6	2	1151.59	0.0019	1073	1082	0	58.5	35	5.4e-05	K	HVVDDGLELR	K
1	RBR1	NGSrhino	Q Exactive	51	yes	AT2G02560	Symbols: CAND1, ATCAND1, ETA2, TIP120, HVE | cullin-associated and neddylation dissociated | chr2:690345-697342 FORWARD LENGTH=1219	437	134811	13	11	10.7	1219	3777	1	1	1	635.362	1268.71	2	1268.71	0.0011	512	524	0	54.19	32	7e-05	K	ALSSPVLAAVGER	Y
1	RBR1	NGSrhino	Q Exactive	51	yes	AT2G02560	Symbols: CAND1, ATCAND1, ETA2, TIP120, HVE | cullin-associated and neddylation dissociated | chr2:690345-697342 FORWARD LENGTH=1219	437	134811	13	11	10.7	1219	4022	1	1	1	648.28	1294.55	2	1294.55	-0.0045	161	171	0	34.88	31	0.0044	K	YGSLMTDDHEK	L
1	RBR1	NGSrhino	Q Exactive	51	yes	AT2G02560	Symbols: CAND1, ATCAND1, ETA2, TIP120, HVE | cullin-associated and neddylation dissociated | chr2:690345-697342 FORWARD LENGTH=1219	437	134811	13	11	10.7	1219	5519	1	1	1	742.386	1482.76	2	1482.75	0.0026	389	400	0	78.69	35	5.1e-07	K	MDVFNTFIDLLR	Q
1	RBR1	NGSrhino	Q Exactive	51	yes	AT2G02560	Symbols: CAND1, ATCAND1, ETA2, TIP120, HVE | cullin-associated and neddylation dissociated | chr2:690345-697342 FORWARD LENGTH=1219	437	134811	13	11	10.7	1219	6093	1	1	1	784.92	1567.83	2	1567.82	0.0017	273	285	0	71.28	34	2.2e-06	R	EYSLQALESFLLR	C
1	RBR1	NGSrhino	Q Exactive	51	yes	AT2G02560	Symbols: CAND1, ATCAND1, ETA2, TIP120, HVE | cullin-associated and neddylation dissociated | chr2:690345-697342 FORWARD LENGTH=1219	437	134811	13	11	10.7	1219	8274	1	1	1	642.384	1924.13	3	1924.13	0.0014	1043	1059	0	55.38	22	5.2e-06	K	GLLPELLPLLYDQTVIK	K
1	RBR1	NGSrhino	Q Exactive	51	yes	AT2G02560	Symbols: CAND1, ATCAND1, ETA2, TIP120, HVE | cullin-associated and neddylation dissociated | chr2:690345-697342 FORWARD LENGTH=1219	437	134811	13	11	10.7	1219	10207	1	1	1	1121.12	2240.23	2	2240.23	0.0009	49	70	0	118.87	30	1.5e-11	R	LSSIILQQLDDVAGDVSGLAVK	C
1	RBR1	NGSrhino	Q Exactive	52	yes	AT3G57290	Symbols: EIF3E, TIF3E1, ATEIF3E-1, INT-6, ATINT6, INT6 | eukaryotic translation initiation factor 3E | chr3:21196786-21199073 REVERSE LENGTH=441	433	51717	8	7	25.2	441	3591	1	1	1	625.803	1249.59	2	1249.59	-0.0025	369	378	0	59.25	37	6.3e-05	K	LNLNYEEAER	W
1	RBR1	NGSrhino	Q Exactive	52	yes	AT3G57290	Symbols: EIF3E, TIF3E1, ATEIF3E-1, INT-6, ATINT6, INT6 | eukaryotic translation initiation factor 3E | chr3:21196786-21199073 REVERSE LENGTH=441	433	51717	8	7	25.2	441	4542	1	1	1	688.852	1375.69	2	1375.68	0.0054	202	213	0	70.85	37	4.8e-06	K	SFSSPLNQVQNR	I
1	RBR1	NGSrhino	Q Exactive	52	yes	AT3G57290	Symbols: EIF3E, TIF3E1, ATEIF3E-1, INT-6, ATINT6, INT6 | eukaryotic translation initiation factor 3E | chr3:21196786-21199073 REVERSE LENGTH=441	433	51717	8	7	25.2	441	6817	1	1	1	558.971	1673.89	3	1673.89	-0.0003	21	33	0	64.52	34	1.1e-05	R	HLVFPIFEFLQER	Q
1	RBR1	NGSrhino	Q Exactive	52	yes	AT3G57290	Symbols: EIF3E, TIF3E1, ATEIF3E-1, INT-6, ATINT6, INT6 | eukaryotic translation initiation factor 3E | chr3:21196786-21199073 REVERSE LENGTH=441	433	51717	8	7	25.2	441	8141	1	1	1	950.48	1898.94	2	1898.94	0.0034	124	139	0	81.76	36	2.7e-07	R	YQIGPDQIEALYQYAK	F
1	RBR1	NGSrhino	Q Exactive	52	yes	AT3G57290	Symbols: EIF3E, TIF3E1, ATEIF3E-1, INT-6, ATINT6, INT6 | eukaryotic translation initiation factor 3E | chr3:21196786-21199073 REVERSE LENGTH=441	433	51717	8	7	25.2	441	9655	1	1	1	716.36	2146.06	3	2146.06	0.0034	46	63	0	81.39	36	3e-07	K	IQLLNQTNMVDYAMDIHK	S
1	RBR1	NGSrhino	Q Exactive	52	yes	AT3G57290	Symbols: EIF3E, TIF3E1, ATEIF3E-1, INT-6, ATINT6, INT6 | eukaryotic translation initiation factor 3E | chr3:21196786-21199073 REVERSE LENGTH=441	433	51717	8	7	25.2	441	10288	1	1	1	1129.58	2257.14	2	2257.14	-0.0044	175	193	0	107.11	36	8.2e-10	K	LASEILMQNWDIALEELNR	L
1	RBR1	NGSrhino	Q Exactive	52	yes	AT3G57290	Symbols: EIF3E, TIF3E1, ATEIF3E-1, INT-6, ATINT6, INT6 | eukaryotic translation initiation factor 3E | chr3:21196786-21199073 REVERSE LENGTH=441	433	51717	8	7	25.2	441	11134	1	1	1	827.78	2480.32	3	2480.33	-0.0088	88	110	0	70.15	32	1.7e-06	K	SLEEAAAPLVSFLLNPNAVQELR	A
1	RBR1	NGSrhino	Q Exactive	53	yes	AT1G67120	Symbols: | ATPases;nucleotide binding;ATP binding;nucleoside-triphosphatases;transcription factor binding | chr1:25069727-25095526 REVERSE LENGTH=5393	429	610771	11	11	3.6	5393	242	1	1	1	417.26	832.505	2	832.506	-0.0004	4069	4075	0	44.06	28	0.0003	R	ALFELLK	L
1	RBR1	NGSrhino	Q Exactive	53	yes	AT1G67120	Symbols: | ATPases;nucleotide binding;ATP binding;nucleoside-triphosphatases;transcription factor binding | chr1:25069727-25095526 REVERSE LENGTH=5393	429	610771	11	11	3.6	5393	1160	1	1	1	478.301	954.587	2	954.586	0.001	858	866	0	35.48	29	0.0025	R	LIGVLEGVR	G
1	RBR1	NGSrhino	Q Exactive	53	yes	AT1G67120	Symbols: | ATPases;nucleotide binding;ATP binding;nucleoside-triphosphatases;transcription factor binding | chr1:25069727-25095526 REVERSE LENGTH=5393	429	610771	11	11	3.6	5393	4397	1	1	1	451.944	1352.81	3	1352.81	0.0012	3944	3955	1	54.47	26	1.5e-05	R	LPVMLVKPDLTK	E
1	RBR1	NGSrhino	Q Exactive	53	yes	AT1G67120	Symbols: | ATPases;nucleotide binding;ATP binding;nucleoside-triphosphatases;transcription factor binding | chr1:25069727-25095526 REVERSE LENGTH=5393	429	610771	11	11	3.6	5393	5262	1	1	1	731.411	1460.81	2	1460.8	0.0055	1836	1848	0	62.9	32	1e-05	K	FAWSDGILLQALK	E
1	RBR1	NGSrhino	Q Exactive	53	yes	AT1G67120	Symbols: | ATPases;nucleotide binding;ATP binding;nucleoside-triphosphatases;transcription factor binding | chr1:25069727-25095526 REVERSE LENGTH=5393	429	610771	11	11	3.6	5393	6390	1	1	1	810.454	1618.89	2	1618.89	0.0011	3071	3085	0	96.54	32	3.8e-09	K	TATVAQILENVFSVK	D
1	RBR1	NGSrhino	Q Exactive	53	yes	AT1G67120	Symbols: | ATPases;nucleotide binding;ATP binding;nucleoside-triphosphatases;transcription factor binding | chr1:25069727-25095526 REVERSE LENGTH=5393	429	610771	11	11	3.6	5393	9347	1	1	1	693.035	2076.08	3	2076.09	-0.0099	4244	4261	0	90.13	35	3.2e-08	K	QLFDNITAMLLEESALLR	T
1	RBR1	NGSrhino	Q Exactive	53	yes	AT1G67120	Symbols: | ATPases;nucleotide binding;ATP binding;nucleoside-triphosphatases;transcription factor binding | chr1:25069727-25095526 REVERSE LENGTH=5393	429	610771	11	11	3.6	5393	9461	1	1	1	1053	2103.99	2	2104	-0.0055	3958	3976	0	54.56	36	0.00016	R	AQFLPLLDPDLMDGASDMR	I
1	RBR1	NGSrhino	Q Exactive	53	yes	AT1G67120	Symbols: | ATPases;nucleotide binding;ATP binding;nucleoside-triphosphatases;transcription factor binding | chr1:25069727-25095526 REVERSE LENGTH=5393	429	610771	11	11	3.6	5393	10290	1	1	1	753.408	2257.2	3	2256.19	1.0118	838	857	0	48.76	33	0.00027	R	EGHWVLLDEVNLAPPEILGR	L
1	RBR1	NGSrhino	Q Exactive	53	yes	AT1G67120	Symbols: | ATPases;nucleotide binding;ATP binding;nucleoside-triphosphatases;transcription factor binding | chr1:25069727-25095526 REVERSE LENGTH=5393	429	610771	11	11	3.6	5393	11278	1	1	1	844.446	2530.31	3	2530.32	-0.0031	1139	1161	0	98.53	34	4.1e-09	R	GGHWIVLDELNLAPSDVLEALNR	L
1	RBR1	NGSrhino	Q Exactive	53	yes	AT1G67120	Symbols: | ATPases;nucleotide binding;ATP binding;nucleoside-triphosphatases;transcription factor binding | chr1:25069727-25095526 REVERSE LENGTH=5393	429	610771	11	11	3.6	5393	11809	1	1	1	904.167	2709.48	3	2709.5	-0.0149	695	719	1	46.62	28	0.00017	K	LTVLNLSQQSDIVDLLGGFKPIDPK	L
1	RBR1	NGSrhino	Q Exactive	53	yes	AT1G67120	Symbols: | ATPases;nucleotide binding;ATP binding;nucleoside-triphosphatases;transcription factor binding | chr1:25069727-25095526 REVERSE LENGTH=5393	429	610771	11	11	3.6	5393	13335	1	1	1	1151.29	3450.84	3	3449.84	0.9994	597	628	1	45.4	28	0.00023	R	VAVSEIVASIWNVAVPESQDKPPIQEFSGILK	I
1	RBR1	NGSrhino	Q Exactive	54	yes	AT5G49910	Symbols: CPHSC70-2EAT SHOCK PROTEIN 70-2, HSC70-7, cpHsc70-2 | chloroplast heat shock protein 70-2 | chr5:20303470-20306295 FORWARD LENGTH=718	427	76950	13	13	20.1	718	516	1	0	0	435.258	868.502	2	868.502	0.0001	539	546	0	40.28	30	0.0011	R	GVPQIEVK	F
1	RBR1	NGSrhino	Q Exactive	54	yes	AT5G49910	Symbols: CPHSC70-2EAT SHOCK PROTEIN 70-2, HSC70-7, cpHsc70-2 | chloroplast heat shock protein 70-2 | chr5:20303470-20306295 FORWARD LENGTH=718	427	76950	13	13	20.1	718	526	1	0	0	435.774	869.534	2	869.533	0.0005	236	243	0	40.52	29	0.0008	R	IAGLEVLR	I
1	RBR1	NGSrhino	Q Exactive	54	yes	AT5G49910	Symbols: CPHSC70-2EAT SHOCK PROTEIN 70-2, HSC70-7, cpHsc70-2 | chloroplast heat shock protein 70-2 | chr5:20303470-20306295 FORWARD LENGTH=718	427	76950	13	13	20.1	718	882	1	0	0	458.248	914.482	2	914.482	-0.0002	389	396	0	47.26	34	0.00049	R	TPVENSLR	D
1	RBR1	NGSrhino	Q Exactive	54	yes	AT5G49910	Symbols: CPHSC70-2EAT SHOCK PROTEIN 70-2, HSC70-7, cpHsc70-2 | chloroplast heat shock protein 70-2 | chr5:20303470-20306295 FORWARD LENGTH=718	427	76950	13	13	20.1	718	1775	1	1	1	517.28	1032.55	2	1032.55	-0.0001	647	656	0	51.6	37	0.0004	K	IASGSTQEIK	D
1	RBR1	NGSrhino	Q Exactive	54	yes	AT5G49910	Symbols: CPHSC70-2EAT SHOCK PROTEIN 70-2, HSC70-7, cpHsc70-2 | chloroplast heat shock protein 70-2 | chr5:20303470-20306295 FORWARD LENGTH=718	427	76950	13	13	20.1	718	2005	1	0	0	533.793	1065.57	2	1065.57	0.0012	111	120	0	44.11	34	0.0011	R	TTPSVVAYTK	S
1	RBR1	NGSrhino	Q Exactive	54	yes	AT5G49910	Symbols: CPHSC70-2EAT SHOCK PROTEIN 70-2, HSC70-7, cpHsc70-2 | chloroplast heat shock protein 70-2 | chr5:20303470-20306295 FORWARD LENGTH=718	427	76950	13	13	20.1	718	2864	1	1	1	583.315	1164.62	2	1164.62	-0.0018	307	316	0	52.64	35	0.00019	R	VVDWLASTFK	K
1	RBR1	NGSrhino	Q Exactive	54	yes	AT5G49910	Symbols: CPHSC70-2EAT SHOCK PROTEIN 70-2, HSC70-7, cpHsc70-2 | chloroplast heat shock protein 70-2 | chr5:20303470-20306295 FORWARD LENGTH=718	427	76950	13	13	20.1	718	3020	1	0	0	593.315	1184.62	2	1184.61	0.0003	100	110	0	70.72	35	2.9e-06	K	PTIVTNAEGQR	T
1	RBR1	NGSrhino	Q Exactive	54	yes	AT5G49910	Symbols: CPHSC70-2EAT SHOCK PROTEIN 70-2, HSC70-7, cpHsc70-2 | chloroplast heat shock protein 70-2 | chr5:20303470-20306295 FORWARD LENGTH=718	427	76950	13	13	20.1	718	4346	1	0	0	672.874	1343.73	2	1343.73	0.0045	568	580	0	59.18	35	4.2e-05	K	QDITITGASTLPK	D
1	RBR1	NGSrhino	Q Exactive	54	yes	AT5G49910	Symbols: CPHSC70-2EAT SHOCK PROTEIN 70-2, HSC70-7, cpHsc70-2 | chloroplast heat shock protein 70-2 | chr5:20303470-20306295 FORWARD LENGTH=718	427	76950	13	13	20.1	718	4530	1	0	0	687.37	1372.73	2	1372.72	0.0053	404	416	0	68.54	36	5.6e-06	K	DIDEVILVGGSTR	I
1	RBR1	NGSrhino	Q Exactive	54	yes	AT5G49910	Symbols: CPHSC70-2EAT SHOCK PROTEIN 70-2, HSC70-7, cpHsc70-2 | chloroplast heat shock protein 70-2 | chr5:20303470-20306295 FORWARD LENGTH=718	427	76950	13	13	20.1	718	4591	1	0	0	691.333	1380.65	2	1380.65	-0.0002	608	619	0	64.73	36	1.5e-05	K	NQADSVVYQTEK	Q
1	RBR1	NGSrhino	Q Exactive	54	yes	AT5G49910	Symbols: CPHSC70-2EAT SHOCK PROTEIN 70-2, HSC70-7, cpHsc70-2 | chloroplast heat shock protein 70-2 | chr5:20303470-20306295 FORWARD LENGTH=718	427	76950	13	13	20.1	718	5259	1	0	0	731.389	1460.76	2	1460.76	0.0006	185	197	0	80.14	36	4.6e-07	K	QFAAEEISAQVLR	K
1	RBR1	NGSrhino	Q Exactive	54	yes	AT5G49910	Symbols: CPHSC70-2EAT SHOCK PROTEIN 70-2, HSC70-7, cpHsc70-2 | chloroplast heat shock protein 70-2 | chr5:20303470-20306295 FORWARD LENGTH=718	427	76950	13	13	20.1	718	6139	1	0	0	790.41	1578.81	2	1578.8	0.0009	133	146	0	69	36	6.2e-06	R	QAVVNPENTFFSVK	R
1	RBR1	NGSrhino	Q Exactive	54	yes	AT5G49910	Symbols: CPHSC70-2EAT SHOCK PROTEIN 70-2, HSC70-7, cpHsc70-2 | chloroplast heat shock protein 70-2 | chr5:20303470-20306295 FORWARD LENGTH=718	427	76950	13	13	20.1	718	6146	1	0	0	790.905	1579.79	2	1579.8	-0.0048	214	227	0	60.63	36	4.2e-05	K	AVITVPAYFNDSQR	T
1	RBR1	NGSrhino	Q Exactive	55	yes	AT2G21390	Symbols: | Coatomer, alpha subunit | chr2:9152428-9156577 FORWARD LENGTH=1218	422	136381	12	12	12.4	1218	636	1	1	1	441.774	881.533	2	881.533	-0.0003	511	518	0	64.09	27	2.1e-06	K	HTIIIASK	K
1	RBR1	NGSrhino	Q Exactive	55	yes	AT2G21390	Symbols: | Coatomer, alpha subunit | chr2:9152428-9156577 FORWARD LENGTH=1218	422	136381	12	12	12.4	1218	1411	1	1	1	494.746	987.478	2	987.477	0.0006	198	205	0	53.81	34	0.00013	K	YVLEGHDR	G
1	RBR1	NGSrhino	Q Exactive	55	yes	AT2G21390	Symbols: | Coatomer, alpha subunit | chr2:9152428-9156577 FORWARD LENGTH=1218	422	136381	12	12	12.4	1218	1421	1	1	1	495.257	988.498	2	988.498	0.0006	238	245	0	43.72	37	0.0023	K	AWEVDTLR	G
1	RBR1	NGSrhino	Q Exactive	55	yes	AT2G21390	Symbols: | Coatomer, alpha subunit | chr2:9152428-9156577 FORWARD LENGTH=1218	422	136381	12	12	12.4	1218	2139	1	1	1	543.254	1084.49	2	1084.49	0.0004	47	55	0	52.87	34	0.00014	R	FDEHEGPVR	G
1	RBR1	NGSrhino	Q Exactive	55	yes	AT2G21390	Symbols: | Coatomer, alpha subunit | chr2:9152428-9156577 FORWARD LENGTH=1218	422	136381	12	12	12.4	1218	2829	1	1	1	581.838	1161.66	2	1161.66	-0.0038	565	574	0	42.52	32	0.0011	R	TLDVPIYITK	V
1	RBR1	NGSrhino	Q Exactive	55	yes	AT2G21390	Symbols: | Coatomer, alpha subunit | chr2:9152428-9156577 FORWARD LENGTH=1218	422	136381	12	12	12.4	1218	4106	1	1	1	437.237	1308.69	3	1308.69	0.0006	358	369	1	36.51	35	0.0077	R	RPGTPSLNQSPR	T
1	RBR1	NGSrhino	Q Exactive	55	yes	AT2G21390	Symbols: | Coatomer, alpha subunit | chr2:9152428-9156577 FORWARD LENGTH=1218	422	136381	12	12	12.4	1218	5599	1	1	1	748.921	1495.83	2	1495.83	-0.0014	705	717	0	74.58	31	5.4e-07	R	LSFLYLITGNLDK	L
1	RBR1	NGSrhino	Q Exactive	55	yes	AT2G21390	Symbols: | Coatomer, alpha subunit | chr2:9152428-9156577 FORWARD LENGTH=1218	422	136381	12	12	12.4	1218	5952	1	1	1	772.9	1543.79	2	1543.78	0.0009	1120	1133	0	80.53	36	4e-07	R	SLLDTNPTIESQAR	T
1	RBR1	NGSrhino	Q Exactive	55	yes	AT2G21390	Symbols: | Coatomer, alpha subunit | chr2:9152428-9156577 FORWARD LENGTH=1218	422	136381	12	12	12.4	1218	6386	1	1	1	809.928	1617.84	2	1617.84	0.0008	992	1006	0	76.85	36	8.6e-07	R	GPPALVFDFSQLEAK	L
1	RBR1	NGSrhino	Q Exactive	55	yes	AT2G21390	Symbols: | Coatomer, alpha subunit | chr2:9152428-9156577 FORWARD LENGTH=1218	422	136381	12	12	12.4	1218	6694	1	1	1	826.45	1650.89	2	1650.88	0.0033	776	791	0	56.91	34	5.2e-05	R	LAIELGDNVPSLPEGK	T
1	RBR1	NGSrhino	Q Exactive	55	yes	AT2G21390	Symbols: | Coatomer, alpha subunit | chr2:9152428-9156577 FORWARD LENGTH=1218	422	136381	12	12	12.4	1218	8208	1	1	1	957.075	1912.14	2	1912.14	-0.0046	1025	1041	0	57.04	22	3.4e-06	R	VFLSILQTIPLVVVESR	R
1	RBR1	NGSrhino	Q Exactive	55	yes	AT2G21390	Symbols: | Coatomer, alpha subunit | chr2:9152428-9156577 FORWARD LENGTH=1218	422	136381	12	12	12.4	1218	10253	1	1	1	751.389	2251.15	3	2251.14	0.0079	206	226	0	70.33	35	3.3e-06	R	GVNWASFHPTLPLIVSGADDR	Q
1	RBR1	NGSrhino	Q Exactive	56	yes	AT3G08580	Symbols: AAC1 | ADP/ATP carrier 1 | chr3:2605706-2607030 REVERSE LENGTH=381	421	41449	10	9	25.2	381	199	1	1	0	414.732	827.45	2	827.45	-0.0004	96	103	0	48.03	32	0.00027	K	TAAAPIER	V
1	RBR1	NGSrhino	Q Exactive	56	yes	AT3G08580	Symbols: AAC1 | ADP/ATP carrier 1 | chr3:2605706-2607030 REVERSE LENGTH=381	421	41449	10	9	25.2	381	324	1	1	0	422.735	843.456	2	843.456	-0.0007	146	153	0	61.91	34	1.8e-05	R	GNTANVIR	Y
1	RBR1	NGSrhino	Q Exactive	56	yes	AT3G08580	Symbols: AAC1 | ADP/ATP carrier 1 | chr3:2605706-2607030 REVERSE LENGTH=381	421	41449	10	9	25.2	381	903	1	1	0	459.295	916.576	2	916.575	0.0013	367	374	0	52.81	26	2.3e-05	K	LQLIVFGK	K
1	RBR1	NGSrhino	Q Exactive	56	yes	AT3G08580	Symbols: AAC1 | ADP/ATP carrier 1 | chr3:2605706-2607030 REVERSE LENGTH=381	421	41449	10	9	25.2	381	1240	1	1	1	483.258	964.501	2	964.498	0.0029	242	250	0	53.03	36	0.00024	K	TDGIAGLYR	G
1	RBR1	NGSrhino	Q Exactive	56	yes	AT3G08580	Symbols: AAC1 | ADP/ATP carrier 1 | chr3:2605706-2607030 REVERSE LENGTH=381	421	41449	10	9	25.2	381	2001	1	1	1	533.751	1065.49	2	1065.49	-0.0009	137	145	0	54.63	35	0.00012	K	DEGFGSLWR	G
1	RBR1	NGSrhino	Q Exactive	56	yes	AT3G08580	Symbols: AAC1 | ADP/ATP carrier 1 | chr3:2605706-2607030 REVERSE LENGTH=381	421	41449	10	9	25.2	381	3229	1	1	1	604.321	1206.63	2	1206.62	0.0025	354	366	0	61.27	36	3e-05	R	AVAGAGVLSGYDK	L
1	RBR1	NGSrhino	Q Exactive	56	yes	AT3G08580	Symbols: AAC1 | ADP/ATP carrier 1 | chr3:2605706-2607030 REVERSE LENGTH=381	421	41449	10	9	25.2	381	3257	1	1	1	606.305	1210.6	2	1210.6	-0.0032	228	237	0	63.79	36	1.9e-05	R	QFDGLVDVYR	K
1	RBR1	NGSrhino	Q Exactive	56	yes	AT3G08580	Symbols: AAC1 | ADP/ATP carrier 1 | chr3:2605706-2607030 REVERSE LENGTH=381	421	41449	10	9	25.2	381	4345	1	1	1	672.863	1343.71	2	1343.71	-0.0005	106	116	0	75.54	36	1.3e-06	K	LLIQNQDEMIK	A
1	RBR1	NGSrhino	Q Exactive	56	yes	AT3G08580	Symbols: AAC1 | ADP/ATP carrier 1 | chr3:2605706-2607030 REVERSE LENGTH=381	421	41449	10	9	25.2	381	8995	1	1	1	1016.51	2031.01	2	2031.01	-0.0013	76	95	0	115.03	35	1.2e-10	K	GFTNFALDFLMGGVSAAVSK	T
1	RBR1	NGSrhino	Q Exactive	57	yes	AT5G03290	Symbols: IDH-V | isocitrate dehydrogenase V | chr5:794043-795939 FORWARD LENGTH=374	410	40599	8	7	27.3	374	122	1	1	0	408.752	815.489	2	815.486	0.0022	121	127	0	41.72	36	0.0027	R	SLNLTLR	K
1	RBR1	NGSrhino	Q Exactive	57	yes	AT5G03290	Symbols: IDH-V | isocitrate dehydrogenase V | chr5:794043-795939 FORWARD LENGTH=374	410	40599	8	7	27.3	374	3334	1	1	0	611.819	1221.62	2	1221.62	-0.0006	149	158	0	58.57	36	6.6e-05	R	YDDVDLITIR	E
1	RBR1	NGSrhino	Q Exactive	57	yes	AT5G03290	Symbols: IDH-V | isocitrate dehydrogenase V | chr5:794043-795939 FORWARD LENGTH=374	410	40599	8	7	27.3	374	5704	1	1	1	758.363	1514.71	2	1514.71	0.0015	354	368	0	117.34	35	6.6e-11	R	TADLGGSSTTTEFTK	A
1	RBR1	NGSrhino	Q Exactive	57	yes	AT5G03290	Symbols: IDH-V | isocitrate dehydrogenase V | chr5:794043-795939 FORWARD LENGTH=374	410	40599	8	7	27.3	374	6846	1	1	1	841.925	1681.84	2	1681.83	0.0039	88	101	0	74.83	36	1.4e-06	R	TQSFLTWESLESVR	R
1	RBR1	NGSrhino	Q Exactive	57	yes	AT5G03290	Symbols: IDH-V | isocitrate dehydrogenase V | chr5:794043-795939 FORWARD LENGTH=374	410	40599	8	7	27.3	374	7612	1	1	1	605.339	1813	3	1813	0.001	312	328	0	85.38	32	5.4e-08	K	NLANPTALLLSGVMMLR	H
1	RBR1	NGSrhino	Q Exactive	57	yes	AT5G03290	Symbols: IDH-V | isocitrate dehydrogenase V | chr5:794043-795939 FORWARD LENGTH=374	410	40599	8	7	27.3	374	7826	1	1	1	923.93	1845.85	2	1845.85	-0.0036	159	174	0	102.85	35	2e-09	R	ENTEGEYSGLEHQVVR	G
1	RBR1	NGSrhino	Q Exactive	57	yes	AT5G03290	Symbols: IDH-V | isocitrate dehydrogenase V | chr5:794043-795939 FORWARD LENGTH=374	410	40599	8	7	27.3	374	11649	1	1	1	882.433	2644.28	3	2644.28	-0.0045	65	87	0	45.14	36	0.0013	K	VFTTAGVPIEWEEHYVGTEIDPR	T
1	RBR1	NGSrhino	Q Exactive	58	yes	AT2G20140	Symbols: | AAA-type ATPase family protein | chr2:8692736-8694837 FORWARD LENGTH=443	403	49316	7	6	24.8	443	3057	1	1	1	595.826	1189.64	2	1189.63	0.0024	224	235	0	46.6	36	0.00092	K	GVILYGEPGTGK	T
1	RBR1	NGSrhino	Q Exactive	58	yes	AT2G20140	Symbols: | AAA-type ATPase family protein | chr2:8692736-8694837 FORWARD LENGTH=443	403	49316	7	6	24.8	443	7221	1	1	1	876.434	1750.85	2	1750.86	-0.0029	311	325	0	105.15	36	1.5e-09	R	TMLELLNQLDGFDSR	G
1	RBR1	NGSrhino	Q Exactive	58	yes	AT2G20140	Symbols: | AAA-type ATPase family protein | chr2:8692736-8694837 FORWARD LENGTH=443	403	49316	7	6	24.8	443	9651	1	1	1	715.711	2144.11	3	2144.1	0.01	182	201	0	94.98	35	1e-08	K	APLESYADIGGLEAQIQEIK	E
1	RBR1	NGSrhino	Q Exactive	58	yes	AT2G20140	Symbols: | AAA-type ATPase family protein | chr2:8692736-8694837 FORWARD LENGTH=443	403	49316	7	6	24.8	443	9832	1	1	1	1079.58	2157.14	2	2157.14	-0.0005	159	178	0	98.31	33	3.1e-09	K	VLSVVGILQDEVDPMVSVMK	V
1	RBR1	NGSrhino	Q Exactive	58	yes	AT2G20140	Symbols: | AAA-type ATPase family protein | chr2:8692736-8694837 FORWARD LENGTH=443	403	49316	7	6	24.8	443	10056	1	1	1	735.718	2204.13	3	2203.13	1.0055	276	296	0	86.48	35	7.6e-08	R	VADDLSPSIVFIDEIDAVGTK	R
1	RBR1	NGSrhino	Q Exactive	58	yes	AT2G20140	Symbols: | AAA-type ATPase family protein | chr2:8692736-8694837 FORWARD LENGTH=443	403	49316	7	6	24.8	443	11158	1	1	1	623.091	2488.34	4	2487.33	1.0097	202	223	1	45.33	31	0.00043	K	EAVELPLTHPELYEDIGIKPPK	G
1	RBR1	NGSrhino	Q Exactive	59	yes	AT1G22780	Symbols: PFL, RPS18A, PFL1 | Ribosomal protein S13/S18 family | chr1:8067990-8069163 FORWARD LENGTH=152	383	17534	7	6	45.4	152	1692	1	1	1	512.301	1022.59	2	1022.58	0.0032	26	34	0	52.25	30	7.1e-05	K	IMFALTSIK	G
1	RBR1	NGSrhino	Q Exactive	59	yes	AT1G22780	Symbols: PFL, RPS18A, PFL1 | Ribosomal protein S13/S18 family | chr1:8067990-8069163 FORWARD LENGTH=152	383	17534	7	6	45.4	152	1957	1	1	1	530.782	1059.55	2	1059.55	0	79	86	0	59.83	36	5e-05	K	IPDWFLNR	Q
1	RBR1	NGSrhino	Q Exactive	59	yes	AT1G22780	Symbols: PFL, RPS18A, PFL1 | Ribosomal protein S13/S18 family | chr1:8067990-8069163 FORWARD LENGTH=152	383	17534	7	6	45.4	152	4401	1	1	1	677.839	1353.66	2	1353.66	0.0037	95	106	0	76.23	36	1e-06	K	YSQVVSNALDMK	L
1	RBR1	NGSrhino	Q Exactive	59	yes	AT1G22780	Symbols: PFL, RPS18A, PFL1 | Ribosomal protein S13/S18 family | chr1:8067990-8069163 FORWARD LENGTH=152	383	17534	7	6	45.4	152	6283	1	1	1	799.419	1596.82	2	1596.83	-0.0032	2	14	0	94.23	35	1.3e-08	M	SLVANEEFQHILR	V	Acetyl (Protein N-term)	1.0000000000000.0
1	RBR1	NGSrhino	Q Exactive	59	yes	AT1G22780	Symbols: PFL, RPS18A, PFL1 | Ribosomal protein S13/S18 family | chr1:8067990-8069163 FORWARD LENGTH=152	383	17534	7	6	45.4	152	9373	1	1	1	1043.04	2084.06	2	2084.06	0.0055	56	75	0	161.6	35	2.6e-15	R	AGELSAAEIDNLMTIVANPR	Q
1	RBR1	NGSrhino	Q Exactive	60	yes	AT3G53870	Symbols: | Ribosomal protein S3 family protein | chr3:19951547-19952782 FORWARD LENGTH=249	368	27332	10	9	40.6	249	508	1	1	0	434.716	867.417	2	867.416	0.0005	125	132	0	49.7	35	0.00038	R	FVMESGAK	G
1	RBR1	NGSrhino	Q Exactive	60	yes	AT3G53870	Symbols: | Ribosomal protein S3 family protein | chr3:19951547-19952782 FORWARD LENGTH=249	368	27332	10	9	40.6	249	676	1	1	0	444.742	887.47	2	887.471	-0.0013	55	62	0	41.6	36	0.0034	R	TQNVLGEK	G
1	RBR1	NGSrhino	Q Exactive	60	yes	AT3G53870	Symbols: | Ribosomal protein S3 family protein | chr3:19951547-19952782 FORWARD LENGTH=249	368	27332	10	9	40.6	249	900	1	1	0	459.269	916.524	2	916.523	0.0007	68	75	0	47.33	35	0.00071	R	ELTSLVQK	R
1	RBR1	NGSrhino	Q Exactive	60	yes	AT3G53870	Symbols: | Ribosomal protein S3 family protein | chr3:19951547-19952782 FORWARD LENGTH=249	368	27332	10	9	40.6	249	1538	1	1	1	502.251	1002.49	2	1002.48	0.0027	188	195	0	36.8	35	0.0069	K	VMLDWDPK	G
1	RBR1	NGSrhino	Q Exactive	60	yes	AT3G53870	Symbols: | Ribosomal protein S3 family protein | chr3:19951547-19952782 FORWARD LENGTH=249	368	27332	10	9	40.6	249	3773	1	1	0	635.293	1268.57	2	1268.57	-0.0001	154	165	0	49.41	35	0.00037	K	DGYMVSSGQPTK	E
1	RBR1	NGSrhino	Q Exactive	60	yes	AT3G53870	Symbols: | Ribosomal protein S3 family protein | chr3:19951547-19952782 FORWARD LENGTH=249	368	27332	10	9	40.6	249	4869	1	1	1	472.615	1414.82	3	1414.82	0.0054	202	214	0	63.7	29	4e-06	K	TPLPDVVIIHSPK	E
1	RBR1	NGSrhino	Q Exactive	60	yes	AT3G53870	Symbols: | Ribosomal protein S3 family protein | chr3:19951547-19952782 FORWARD LENGTH=249	368	27332	10	9	40.6	249	4933	1	1	0	712.339	1422.66	2	1422.66	0.0004	28	40	0	88.6	36	6.2e-08	R	ELAEDGYSGVEVR	V
1	RBR1	NGSrhino	Q Exactive	60	yes	AT3G53870	Symbols: | Ribosomal protein S3 family protein | chr3:19951547-19952782 FORWARD LENGTH=249	368	27332	10	9	40.6	249	6792	1	1	0	836.437	1670.86	2	1670.86	0.0047	77	90	1	36.77	36	0.0085	R	FKFPVDSVELYAEK	V
1	RBR1	NGSrhino	Q Exactive	60	yes	AT3G53870	Symbols: | Ribosomal protein S3 family protein | chr3:19951547-19952782 FORWARD LENGTH=249	368	27332	10	9	40.6	249	8350	1	1	0	648.335	1941.98	3	1941.98	0.0001	11	27	0	107.98	36	6.4e-10	K	FVADGVFYAELNEVLTR	E
1	RBR1	NGSrhino	Q Exactive	61	yes	AT5G02870	Symbols: | Ribosomal protein L4/L1 family | chr5:657830-659526 FORWARD LENGTH=407	366	44694	8	7	25.6	407	590	1	0	0	439.253	876.492	2	876.493	-0.0014	247	255	0	53.14	34	0.00014	K	LAPGGHLGR	F
1	RBR1	NGSrhino	Q Exactive	61	yes	AT5G02870	Symbols: | Ribosomal protein L4/L1 family | chr5:657830-659526 FORWARD LENGTH=407	366	44694	8	7	25.6	407	4076	1	1	1	651.876	1301.74	2	1301.73	0.003	211	223	1	93.8	32	8.2e-09	R	KGPLVVFGTEGAK	I
1	RBR1	NGSrhino	Q Exactive	61	yes	AT5G02870	Symbols: | Ribosomal protein L4/L1 family | chr5:657830-659526 FORWARD LENGTH=407	366	44694	8	7	25.6	407	5102	1	0	0	722.832	1443.65	2	1443.65	0.0003	64	77	0	69.1	33	3e-06	K	AGHQTSAESWGTGR	A
1	RBR1	NGSrhino	Q Exactive	61	yes	AT5G02870	Symbols: | Ribosomal protein L4/L1 family | chr5:657830-659526 FORWARD LENGTH=407	366	44694	8	7	25.6	407	6359	1	0	0	807.408	1612.8	2	1612.8	0.002	267	280	1	69.43	36	4.9e-06	K	LESIYGSFEKPSEK	K
1	RBR1	NGSrhino	Q Exactive	61	yes	AT5G02870	Symbols: | Ribosomal protein L4/L1 family | chr5:657830-659526 FORWARD LENGTH=407	366	44694	8	7	25.6	407	6718	1	1	1	827.955	1653.89	2	1653.89	0.0013	299	313	0	91.53	33	1.5e-08	R	IINSDEVQSVVNPIK	D
1	RBR1	NGSrhino	Q Exactive	61	yes	AT5G02870	Symbols: | Ribosomal protein L4/L1 family | chr5:657830-659526 FORWARD LENGTH=407	366	44694	8	7	25.6	407	7906	1	0	0	621.36	1861.06	3	1861.06	-0.0031	128	146	0	57.74	27	1e-05	R	HAIVSAIAATAVPALVMAR	G
1	RBR1	NGSrhino	Q Exactive	61	yes	AT5G02870	Symbols: | Ribosomal protein L4/L1 family | chr5:657830-659526 FORWARD LENGTH=407	366	44694	8	7	25.6	407	9823	1	0	0	1078.55	2155.08	2	2155.07	0.007	150	169	0	60.68	36	3.4e-05	K	IENVPEMPLVVSDSAEAVEK	T
1	RBR1	NGSrhino	Q Exactive	62	yes	AT5G50920	Symbols: CLPC, ATHSP93-V, HSP93-V, DCA1, CLPC1 | CLPC homologue 1 | chr5:20715710-20719800 REVERSE LENGTH=929	363	103388	10	10	13.2	929	873	1	1	1	457.783	913.552	2	913.548	0.0036	824	831	0	37.34	32	0.0031	K	EIADILLK	E
1	RBR1	NGSrhino	Q Exactive	62	yes	AT5G50920	Symbols: CLPC, ATHSP93-V, HSP93-V, DCA1, CLPC1 | CLPC homologue 1 | chr5:20715710-20719800 REVERSE LENGTH=929	363	103388	10	10	13.2	929	1685	1	0	0	511.772	1021.53	2	1021.53	0.0034	808	815	0	53.5	36	0.00019	R	LDEMIVFR	Q
1	RBR1	NGSrhino	Q Exactive	62	yes	AT5G50920	Symbols: CLPC, ATHSP93-V, HSP93-V, DCA1, CLPC1 | CLPC homologue 1 | chr5:20715710-20719800 REVERSE LENGTH=929	363	103388	10	10	13.2	929	1733	1	0	0	515.288	1028.56	2	1028.56	0.0001	309	318	0	69.76	35	3.7e-06	K	TAIAEGLAQR	I
1	RBR1	NGSrhino	Q Exactive	62	yes	AT5G50920	Symbols: CLPC, ATHSP93-V, HSP93-V, DCA1, CLPC1 | CLPC homologue 1 | chr5:20715710-20719800 REVERSE LENGTH=929	363	103388	10	10	13.2	929	1790	1	1	1	518.762	1035.51	2	1035.51	-0.0003	500	508	0	57.88	36	7.3e-05	R	HAQVPEEAR	E
1	RBR1	NGSrhino	Q Exactive	62	yes	AT5G50920	Symbols: CLPC, ATHSP93-V, HSP93-V, DCA1, CLPC1 | CLPC homologue 1 | chr5:20715710-20719800 REVERSE LENGTH=929	363	103388	10	10	13.2	929	2776	1	0	0	579.254	1156.49	2	1156.49	0.0034	672	680	0	70.83	31	1.2e-06	R	LDMSEFMER	H
1	RBR1	NGSrhino	Q Exactive	62	yes	AT5G50920	Symbols: CLPC, ATHSP93-V, HSP93-V, DCA1, CLPC1 | CLPC homologue 1 | chr5:20715710-20719800 REVERSE LENGTH=929	363	103388	10	10	13.2	929	3230	1	0	0	604.324	1206.63	2	1206.64	-0.0028	417	426	1	44.76	36	0.0015	K	HIEKDPALER	R
1	RBR1	NGSrhino	Q Exactive	62	yes	AT5G50920	Symbols: CLPC, ATHSP93-V, HSP93-V, DCA1, CLPC1 | CLPC homologue 1 | chr5:20715710-20719800 REVERSE LENGTH=929	363	103388	10	10	13.2	929	5370	1	0	0	738.895	1475.78	2	1475.78	-0.0015	163	176	0	44.28	36	0.0016	R	GSGFVAVEIPFTPR	A
1	RBR1	NGSrhino	Q Exactive	62	yes	AT5G50920	Symbols: CLPC, ATHSP93-V, HSP93-V, DCA1, CLPC1 | CLPC homologue 1 | chr5:20715710-20719800 REVERSE LENGTH=929	363	103388	10	10	13.2	929	5595	1	0	0	748.87	1495.72	2	1495.72	0.002	254	266	0	67.79	36	8.1e-06	K	MPTLEEYGTNLTK	L
1	RBR1	NGSrhino	Q Exactive	62	yes	AT5G50920	Symbols: CLPC, ATHSP93-V, HSP93-V, DCA1, CLPC1 | CLPC homologue 1 | chr5:20715710-20719800 REVERSE LENGTH=929	363	103388	10	10	13.2	929	8762	1	0	0	662.657	1984.95	3	1984.95	-0.0004	722	738	0	74.89	36	1.6e-06	K	AHPDVFNMMLQILEDGR	L
1	RBR1	NGSrhino	Q Exactive	62	yes	AT5G50920	Symbols: CLPC, ATHSP93-V, HSP93-V, DCA1, CLPC1 | CLPC homologue 1 | chr5:20715710-20719800 REVERSE LENGTH=929	363	103388	10	10	13.2	929	11208	1	0	0	837.133	2508.38	3	2507.37	1.0013	116	140	0	87.24	30	2.2e-08	R	LGHNFVGTEQILLGLIGEGTGIAAK	V
1	RBR1	NGSrhino	Q Exactive	63	yes	AT5G17020	Symbols: XPO1A, ATCRM1, ATXPO1, XPO1, HIT2 | exportin 1A | chr5:5594904-5602467 FORWARD LENGTH=1075	363	123164	8	7	8.3	1075	1346	1	1	1	489.78	977.545	2	977.543	0.0021	761	768	0	60.05	35	3.4e-05	K	LIETFLDK	A
1	RBR1	NGSrhino	Q Exactive	63	yes	AT5G17020	Symbols: XPO1A, ATCRM1, ATXPO1, XPO1, HIT2 | exportin 1A | chr5:5594904-5602467 FORWARD LENGTH=1075	363	123164	8	7	8.3	1075	2414	1	1	1	556.796	1111.58	2	1111.58	0.0003	82	90	0	43.25	34	0.0015	R	WNALPVEQR	D
1	RBR1	NGSrhino	Q Exactive	63	yes	AT5G17020	Symbols: XPO1A, ATCRM1, ATXPO1, XPO1, HIT2 | exportin 1A | chr5:5594904-5602467 FORWARD LENGTH=1075	363	123164	8	7	8.3	1075	4464	1	1	1	682.406	1362.8	2	1362.79	0.0058	68	79	0	64.22	28	2.6e-06	K	FFALQVLEGVIK	Y
1	RBR1	NGSrhino	Q Exactive	63	yes	AT5G17020	Symbols: XPO1A, ATCRM1, ATXPO1, XPO1, HIT2 | exportin 1A | chr5:5594904-5602467 FORWARD LENGTH=1075	363	123164	8	7	8.3	1075	4890	1	1	1	709.888	1417.76	2	1417.76	-0.0002	137	149	0	38.74	35	0.0052	K	WTSFIPDLVAAAK	T
1	RBR1	NGSrhino	Q Exactive	63	yes	AT5G17020	Symbols: XPO1A, ATCRM1, ATXPO1, XPO1, HIT2 | exportin 1A | chr5:5594904-5602467 FORWARD LENGTH=1075	363	123164	8	7	8.3	1075	6055	1	1	1	782.433	1562.85	2	1562.86	-0.0046	800	813	0	64.11	33	8.9e-06	R	ESEVLSLFATIINK	Y
1	RBR1	NGSrhino	Q Exactive	63	yes	AT5G17020	Symbols: XPO1A, ATCRM1, ATXPO1, XPO1, HIT2 | exportin 1A | chr5:5594904-5602467 FORWARD LENGTH=1075	363	123164	8	7	8.3	1075	6796	1	1	1	836.468	1670.92	2	1670.93	-0.0058	891	905	0	115.11	32	5.6e-11	R	NIAETGLNLLLEMLK	N
1	RBR1	NGSrhino	Q Exactive	63	yes	AT5G17020	Symbols: XPO1A, ATCRM1, ATXPO1, XPO1, HIT2 | exportin 1A | chr5:5594904-5602467 FORWARD LENGTH=1075	363	123164	8	7	8.3	1075	9224	1	1	1	686.016	2055.03	3	2055.03	-0.0006	95	112	0	82.13	36	2.5e-07	K	NYISEVIVQLSSNEASFR	S
1	RBR1	NGSrhino	Q Exactive	64	yes	AT5G43010	Symbols: RPT4A | regulatory particle triple-A ATPase 4A | chr5:17248563-17251014 REVERSE LENGTH=399	358	44789	10	9	31.6	399	999	1	1	0	466.277	930.539	2	930.539	0.0009	204	212	0	44.12	34	0.0011	K	VVSSAIIDK	Y
1	RBR1	NGSrhino	Q Exactive	64	yes	AT5G43010	Symbols: RPT4A | regulatory particle triple-A ATPase 4A | chr5:17248563-17251014 REVERSE LENGTH=399	358	44789	10	9	31.6	399	2797	1	0	0	579.831	1157.65	2	1157.64	0.0035	175	186	0	39.98	35	0.0035	K	GVLLYGPPGTGK	T
1	RBR1	NGSrhino	Q Exactive	64	yes	AT5G43010	Symbols: RPT4A | regulatory particle triple-A ATPase 4A | chr5:17248563-17251014 REVERSE LENGTH=399	358	44789	10	9	31.6	399	2839	1	1	1	582.291	1162.57	2	1162.56	0.0053	340	350	0	84.08	36	1.8e-07	K	LAEGFNGADLR	N	Deamidated (NQ)	0.00000200000.0
1	RBR1	NGSrhino	Q Exactive	64	yes	AT5G43010	Symbols: RPT4A | regulatory particle triple-A ATPase 4A | chr5:17248563-17251014 REVERSE LENGTH=399	358	44789	10	9	31.6	399	3801	1	1	0	637.326	1272.64	2	1272.63	0.0024	329	339	0	71.33	35	2.8e-06	K	HGEIDYEAIVK	L
1	RBR1	NGSrhino	Q Exactive	64	yes	AT5G43010	Symbols: RPT4A | regulatory particle triple-A ATPase 4A | chr5:17248563-17251014 REVERSE LENGTH=399	358	44789	10	9	31.6	399	5197	1	1	0	727.826	1453.64	2	1453.65	-0.0095	386	398	0	74.1	34	1e-06	K	LESSSHYNADFGK	E
1	RBR1	NGSrhino	Q Exactive	64	yes	AT5G43010	Symbols: RPT4A | regulatory particle triple-A ATPase 4A | chr5:17248563-17251014 REVERSE LENGTH=399	358	44789	10	9	31.6	399	7546	1	1	0	900.982	1799.95	2	1799.95	0.001	153	167	0	54.95	35	0.0001	R	ESIELPLMNPELFLR	V
1	RBR1	NGSrhino	Q Exactive	64	yes	AT5G43010	Symbols: RPT4A | regulatory particle triple-A ATPase 4A | chr5:17248563-17251014 REVERSE LENGTH=399	358	44789	10	9	31.6	399	8241	1	1	1	640.996	1919.97	3	1919.97	0.0009	262	278	0	71.07	36	3.7e-06	R	TLMELLNQLDGFDNLGK	V
1	RBR1	NGSrhino	Q Exactive	64	yes	AT5G43010	Symbols: RPT4A | regulatory particle triple-A ATPase 4A | chr5:17248563-17251014 REVERSE LENGTH=399	358	44789	10	9	31.6	399	13036	1	1	0	1082.19	3243.56	3	3243.55	0.0101	120	149	0	74.3	35	1.3e-06	R	EVDPVVYNMLHEDPGNISYSAVGGLGDQIR	E
1	RBR1	NGSrhino	Q Exactive	65	yes	AT4G35260	Symbols: IDH1, IDH-I | isocitrate dehydrogenase 1 | chr4:16774494-16776233 REVERSE LENGTH=367	356	39602	7	7	24.8	367	2201	1	1	1	547.241	1092.47	2	1092.47	0.0008	72	80	0	44.91	33	0.00067	K	YDVHGEMSR	V
1	RBR1	NGSrhino	Q Exactive	65	yes	AT4G35260	Symbols: IDH1, IDH-I | isocitrate dehydrogenase 1 | chr4:16774494-16776233 REVERSE LENGTH=367	356	39602	7	7	24.8	367	2772	1	1	1	578.806	1155.6	2	1155.6	0.0022	81	90	0	41.65	34	0.002	R	VPPEVMESIR	K
1	RBR1	NGSrhino	Q Exactive	65	yes	AT4G35260	Symbols: IDH1, IDH-I | isocitrate dehydrogenase 1 | chr4:16774494-16776233 REVERSE LENGTH=367	356	39602	7	7	24.8	367	3091	1	1	0	597.337	1192.66	2	1192.66	0.0022	138	147	0	73.98	33	9.5e-07	R	HENVDIVVIR	E
1	RBR1	NGSrhino	Q Exactive	65	yes	AT4G35260	Symbols: IDH1, IDH-I | isocitrate dehydrogenase 1 | chr4:16774494-16776233 REVERSE LENGTH=367	356	39602	7	7	24.8	367	3296	1	1	0	609.306	1216.6	2	1216.6	-0.0011	321	330	0	37.5	36	0.0072	R	HLQFPSFADR	L
1	RBR1	NGSrhino	Q Exactive	65	yes	AT4G35260	Symbols: IDH1, IDH-I | isocitrate dehydrogenase 1 | chr4:16774494-16776233 REVERSE LENGTH=367	356	39602	7	7	24.8	367	4932	1	1	0	712.337	1422.66	2	1422.66	0.0025	183	193	0	75.73	36	1.1e-06	K	YAFEYAYLNNR	K
1	RBR1	NGSrhino	Q Exactive	65	yes	AT4G35260	Symbols: IDH1, IDH-I | isocitrate dehydrogenase 1 | chr4:16774494-16776233 REVERSE LENGTH=367	356	39602	7	7	24.8	367	7569	1	1	1	902.469	1802.92	2	1802.93	-0.0027	348	365	0	123.49	36	1.9e-11	K	DLGGTSTTQEVVDAVIAK	L
1	RBR1	NGSrhino	Q Exactive	65	yes	AT4G35260	Symbols: IDH1, IDH-I | isocitrate dehydrogenase 1 | chr4:16774494-16776233 REVERSE LENGTH=367	356	39602	7	7	24.8	367	11151	1	1	0	1243.11	2484.2	2	2484.2	-0.0003	148	170	0	105.42	36	1.2e-09	R	ENTEGEYAGLEHEVVPGVVESLK	V
1	RBR1	NGSrhino	Q Exactive	66	yes	AT1G29150	Symbols: ATS9, RPN6 | non-ATPase subunit 9 | chr1:10181240-10182499 FORWARD LENGTH=419	351	46720	7	6	22.7	419	4511	1	1	1	685.912	1369.81	2	1369.81	0.0028	161	172	0	74.99	28	2.2e-07	K	LLLVDIDLLESK	L
1	RBR1	NGSrhino	Q Exactive	66	yes	AT1G29150	Symbols: ATS9, RPN6 | non-ATPase subunit 9 | chr1:10181240-10182499 FORWARD LENGTH=419	351	46720	7	6	22.7	419	5376	1	1	1	739.373	1476.73	2	1476.73	0.0025	271	284	0	72.17	37	3.1e-06	K	AGLQYVGPDLDAMK	A
1	RBR1	NGSrhino	Q Exactive	66	yes	AT1G29150	Symbols: ATS9, RPN6 | non-ATPase subunit 9 | chr1:10181240-10182499 FORWARD LENGTH=419	351	46720	7	6	22.7	419	5974	1	1	1	774.948	1547.88	2	1547.88	0.0011	139	152	0	81.84	30	6.9e-08	K	EYVEALALLSTLVK	E
1	RBR1	NGSrhino	Q Exactive	66	yes	AT1G29150	Symbols: ATS9, RPN6 | non-ATPase subunit 9 | chr1:10181240-10182499 FORWARD LENGTH=419	351	46720	7	6	22.7	419	6459	1	1	1	817.427	1632.84	2	1632.84	0	255	270	0	84.51	36	1.5e-07	K	IMVSQADDVAGIISSK	A
1	RBR1	NGSrhino	Q Exactive	66	yes	AT1G29150	Symbols: ATS9, RPN6 | non-ATPase subunit 9 | chr1:10181240-10182499 FORWARD LENGTH=419	351	46720	7	6	22.7	419	9426	1	1	1	699.399	2095.17	3	2095.17	0.0065	341	359	0	75.19	29	2.5e-07	R	VEIAHIAELIGLPLDHVEK	K
1	RBR1	NGSrhino	Q Exactive	66	yes	AT1G29150	Symbols: ATS9, RPN6 | non-ATPase subunit 9 | chr1:10181240-10182499 FORWARD LENGTH=419	351	46720	7	6	22.7	419	10607	1	1	1	1159.52	2317.04	2	2317.03	0.0025	223	242	0	58.11	34	4.1e-05	K	TGYSYFFEAFESFNALGDPR	A
1	RBR1	NGSrhino	Q Exactive	67	yes	AT5G19820	Symbols: emb2734 | ARM repeat superfamily protein | chr5:6695731-6701247 REVERSE LENGTH=1116	351	123746	7	6	9.4	1116	2062	1	1	1	538.272	1074.53	2	1074.53	-0.0011	1069	1078	0	50.46	37	0.00049	K	DVVTQETAGR	M
1	RBR1	NGSrhino	Q Exactive	67	yes	AT5G19820	Symbols: emb2734 | ARM repeat superfamily protein | chr5:6695731-6701247 REVERSE LENGTH=1116	351	123746	7	6	9.4	1116	4077	1	1	1	651.902	1301.79	2	1301.8	-0.0058	1057	1068	0	49.32	24	3e-05	K	ILIVFAEVLTGK	D
1	RBR1	NGSrhino	Q Exactive	67	yes	AT5G19820	Symbols: emb2734 | ARM repeat superfamily protein | chr5:6695731-6701247 REVERSE LENGTH=1116	351	123746	7	6	9.4	1116	9879	1	1	1	1085.6	2169.19	2	2169.19	-0.0012	705	723	0	33.28	31	0.0063	K	EGFFPWIDQVAPTLVPLLK	F
1	RBR1	NGSrhino	Q Exactive	67	yes	AT5G19820	Symbols: emb2734 | ARM repeat superfamily protein | chr5:6695731-6701247 REVERSE LENGTH=1116	351	123746	7	6	9.4	1116	9915	1	1	1	728.04	2181.1	3	2181.1	-0.0004	416	434	0	92.71	35	2e-08	K	NLDQVVSMVLSQFQSPHPR	V
1	RBR1	NGSrhino	Q Exactive	67	yes	AT5G19820	Symbols: emb2734 | ARM repeat superfamily protein | chr5:6695731-6701247 REVERSE LENGTH=1116	351	123746	7	6	9.4	1116	11193	1	1	1	835.423	2503.25	3	2503.25	0.0001	270	292	0	120.69	35	3.2e-11	R	QLVDIVGSMLQIAEADSLEESTR	H
1	RBR1	NGSrhino	Q Exactive	67	yes	AT5G19820	Symbols: emb2734 | ARM repeat superfamily protein | chr5:6695731-6701247 REVERSE LENGTH=1116	351	123746	7	6	9.4	1116	11326	1	1	1	850.417	2548.23	3	2547.22	1.0053	849	870	0	77	36	8.7e-07	K	EENEQEEEIFDQVGEILGTLVK	T
1	RBR1	NGSrhino	Q Exactive	68	yes	AT2G31610	Symbols: | Ribosomal protein S3 family protein | chr2:13450384-13451669 FORWARD LENGTH=250	341	27502	10	9	40.4	250	508	1	0	0	434.716	867.417	2	867.416	0.0005	125	132	0	49.7	35	0.00038	R	FVMESGAK	G
1	RBR1	NGSrhino	Q Exactive	68	yes	AT2G31610	Symbols: | Ribosomal protein S3 family protein | chr2:13450384-13451669 FORWARD LENGTH=250	341	27502	10	9	40.4	250	676	1	0	0	444.742	887.47	2	887.471	-0.0013	55	62	0	41.6	36	0.0034	R	TQNVLGEK	G
1	RBR1	NGSrhino	Q Exactive	68	yes	AT2G31610	Symbols: | Ribosomal protein S3 family protein | chr2:13450384-13451669 FORWARD LENGTH=250	341	27502	10	9	40.4	250	900	1	0	0	459.269	916.524	2	916.523	0.0007	68	75	0	47.33	35	0.00071	R	ELTSLVQK	R
1	RBR1	NGSrhino	Q Exactive	68	yes	AT2G31610	Symbols: | Ribosomal protein S3 family protein | chr2:13450384-13451669 FORWARD LENGTH=250	341	27502	10	9	40.4	250	1031	1	1	0	468.743	935.471	2	935.471	0.0001	166	173	0	45.57	36	0.0013	K	EYIDAAVR	H
1	RBR1	NGSrhino	Q Exactive	68	yes	AT2G31610	Symbols: | Ribosomal protein S3 family protein | chr2:13450384-13451669 FORWARD LENGTH=250	341	27502	10	9	40.4	250	3773	1	0	0	635.293	1268.57	2	1268.57	-0.0001	154	165	0	49.41	35	0.00037	K	DGYMVSSGQPTK	E
1	RBR1	NGSrhino	Q Exactive	68	yes	AT2G31610	Symbols: | Ribosomal protein S3 family protein | chr2:13450384-13451669 FORWARD LENGTH=250	341	27502	10	9	40.4	250	4754	1	1	1	467.283	1398.83	3	1398.82	0.0021	202	214	0	38.27	27	0.00076	K	TPLPDVVIIHAPK	D
1	RBR1	NGSrhino	Q Exactive	68	yes	AT2G31610	Symbols: | Ribosomal protein S3 family protein | chr2:13450384-13451669 FORWARD LENGTH=250	341	27502	10	9	40.4	250	4933	1	0	0	712.339	1422.66	2	1422.66	0.0004	28	40	0	88.6	36	6.2e-08	R	ELAEDGYSGVEVR	V
1	RBR1	NGSrhino	Q Exactive	68	yes	AT2G31610	Symbols: | Ribosomal protein S3 family protein | chr2:13450384-13451669 FORWARD LENGTH=250	341	27502	10	9	40.4	250	6792	1	0	0	836.437	1670.86	2	1670.86	0.0047	77	90	1	36.77	36	0.0085	R	FKFPVDSVELYAEK	V
1	RBR1	NGSrhino	Q Exactive	68	yes	AT2G31610	Symbols: | Ribosomal protein S3 family protein | chr2:13450384-13451669 FORWARD LENGTH=250	341	27502	10	9	40.4	250	8350	1	0	0	648.335	1941.98	3	1941.98	0.0001	11	27	0	107.98	36	6.4e-10	K	FVADGVFYAELNEVLTR	E
1	RBR1	NGSrhino	Q Exactive	69	yes	AT3G63460	Symbols: | transducin family protein / WD-40 repeat family protein | chr3:23431009-23437241 REVERSE LENGTH=1104	339	119799	7	7	8.5	1104	560	1	1	1	437.711	873.408	2	873.409	-0.0011	258	264	0	52.06	32	0.00012	R	EFTGHQR	G
1	RBR1	NGSrhino	Q Exactive	69	yes	AT3G63460	Symbols: | transducin family protein / WD-40 repeat family protein | chr3:23431009-23437241 REVERSE LENGTH=1104	339	119799	7	7	8.5	1104	3129	1	1	1	599.774	1197.53	2	1197.53	-0.0005	448	457	0	44.04	34	0.0011	K	IMFEEEGTSR	T
1	RBR1	NGSrhino	Q Exactive	69	yes	AT3G63460	Symbols: | transducin family protein / WD-40 repeat family protein | chr3:23431009-23437241 REVERSE LENGTH=1104	339	119799	7	7	8.5	1104	3826	1	1	1	639.34	1276.67	2	1276.67	-0.0004	318	330	0	66.99	36	8.4e-06	K	IPGVISASSFDGK	I
1	RBR1	NGSrhino	Q Exactive	69	yes	AT3G63460	Symbols: | transducin family protein / WD-40 repeat family protein | chr3:23431009-23437241 REVERSE LENGTH=1104	339	119799	7	7	8.5	1104	5030	1	1	1	720.358	1438.7	2	1438.7	0.0005	709	720	0	73.8	36	2e-06	R	SYAELLQDLMEK	T
1	RBR1	NGSrhino	Q Exactive	69	yes	AT3G63460	Symbols: | transducin family protein / WD-40 repeat family protein | chr3:23431009-23437241 REVERSE LENGTH=1104	339	119799	7	7	8.5	1104	5858	1	1	1	508.965	1523.87	3	1523.87	0.0015	460	473	0	64.51	28	2.6e-06	K	LISHLGFTLPVAEK	D
1	RBR1	NGSrhino	Q Exactive	69	yes	AT3G63460	Symbols: | transducin family protein / WD-40 repeat family protein | chr3:23431009-23437241 REVERSE LENGTH=1104	339	119799	7	7	8.5	1104	6019	1	1	1	778.438	1554.86	2	1554.86	-0.0013	763	777	0	82.64	32	8.7e-08	K	VLDSGGLSPELSILR	D
1	RBR1	NGSrhino	Q Exactive	69	yes	AT3G63460	Symbols: | transducin family protein / WD-40 repeat family protein | chr3:23431009-23437241 REVERSE LENGTH=1104	339	119799	7	7	8.5	1104	11157	1	1	1	830.451	2488.33	3	2488.32	0.0141	385	407	0	105.05	32	5.2e-10	K	GTSSILSEVFLHSLVTEQSLVSR	T
1	RBR1	NGSrhino	Q Exactive	70	yes	AT2G28000	Symbols: CPN60A, CH-CPN60A, SLP | chaperonin-60alpha | chr2:11926603-11929184 FORWARD LENGTH=586	338	62034	6	5	12.5	586	3075	1	1	1	596.808	1191.6	2	1191.6	0.0031	372	383	0	41.27	36	0.0037	K	DSTTLIADAASK	D
1	RBR1	NGSrhino	Q Exactive	70	yes	AT2G28000	Symbols: CPN60A, CH-CPN60A, SLP | chaperonin-60alpha | chr2:11926603-11929184 FORWARD LENGTH=586	338	62034	6	5	12.5	586	3651	1	1	1	629.358	1256.7	2	1256.7	0.0032	167	177	0	60.46	34	2.3e-05	K	TVQGLIEELQK	K
1	RBR1	NGSrhino	Q Exactive	70	yes	AT2G28000	Symbols: CPN60A, CH-CPN60A, SLP | chaperonin-60alpha | chr2:11926603-11929184 FORWARD LENGTH=586	338	62034	6	5	12.5	586	3977	1	1	1	645.812	1289.61	2	1289.61	-0.0015	425	436	0	103.12	35	1.9e-09	K	VGAATETELEDR	K
1	RBR1	NGSrhino	Q Exactive	70	yes	AT2G28000	Symbols: CPN60A, CH-CPN60A, SLP | chaperonin-60alpha | chr2:11926603-11929184 FORWARD LENGTH=586	338	62034	6	5	12.5	586	6141	1	1	1	527.299	1578.87	3	1578.87	0.0012	146	161	0	48.48	31	0.00021	K	HGLLSVTSGANPVSLK	R
1	RBR1	NGSrhino	Q Exactive	70	yes	AT2G28000	Symbols: CPN60A, CH-CPN60A, SLP | chaperonin-60alpha | chr2:11926603-11929184 FORWARD LENGTH=586	338	62034	6	5	12.5	586	10243	1	1	1	750.77	2249.29	3	2249.29	0.0007	289	310	0	105.31	25	1.1e-10	R	APLLIIAEDVTGEALATLVVNK	L
1	RBR1	NGSrhino	Q Exactive	71	no	AT5G58230	Symbols: MSI1, MEE70, ATMSI1 | Transducin/WD40 repeat-like superfamily protein | chr5:23556112-23557994 FORWARD LENGTH=424	335	48164	8	8	32.1	424	1667	1	1	1	510.272	1018.53	2	1018.53	0.002	342	349	0	45.93	37	0.0014	R	LMVWDLSR	I
1	RBR1	NGSrhino	Q Exactive	71	no	AT5G58230	Symbols: MSI1, MEE70, ATMSI1 | Transducin/WD40 repeat-like superfamily protein | chr5:23556112-23557994 FORWARD LENGTH=424	335	48164	8	8	32.1	424	1881	1	1	1	525.286	1048.56	2	1048.56	0.0014	216	224	0	47.34	36	0.00091	K	SLDAQQIFK	A
1	RBR1	NGSrhino	Q Exactive	71	no	AT5G58230	Symbols: MSI1, MEE70, ATMSI1 | Transducin/WD40 repeat-like superfamily protein | chr5:23556112-23557994 FORWARD LENGTH=424	335	48164	8	8	32.1	424	4278	1	1	1	666.835	1331.65	2	1331.65	0.0036	318	328	0	57.55	36	7.9e-05	K	EEVFQVGWNPK	N
1	RBR1	NGSrhino	Q Exactive	71	no	AT5G58230	Symbols: MSI1, MEE70, ATMSI1 | Transducin/WD40 repeat-like superfamily protein | chr5:23556112-23557994 FORWARD LENGTH=424	335	48164	8	8	32.1	424	6383	1	1	1	539.945	1616.81	3	1616.81	0.0066	225	238	0	87.03	37	1.1e-07	K	AHEGVVEDVAWHLR	H
1	RBR1	NGSrhino	Q Exactive	71	no	AT5G58230	Symbols: MSI1, MEE70, ATMSI1 | Transducin/WD40 repeat-like superfamily protein | chr5:23556112-23557994 FORWARD LENGTH=424	335	48164	8	8	32.1	424	7281	1	1	1	588.312	1761.91	3	1761.91	0.0023	116	130	0	56.4	36	9.9e-05	K	VQIIQQINHDGEVNR	A
1	RBR1	NGSrhino	Q Exactive	71	no	AT5G58230	Symbols: MSI1, MEE70, ATMSI1 | Transducin/WD40 repeat-like superfamily protein | chr5:23556112-23557994 FORWARD LENGTH=424	335	48164	8	8	32.1	424	11006	1	1	1	814.072	2439.2	3	2438.19	1.0046	239	258	0	89.34	36	4.8e-08	R	HEYLFGSVGDDQYLLIWDLR	S
1	RBR1	NGSrhino	Q Exactive	71	no	AT5G58230	Symbols: MSI1, MEE70, ATMSI1 | Transducin/WD40 repeat-like superfamily protein | chr5:23556112-23557994 FORWARD LENGTH=424	335	48164	8	8	32.1	424	12633	1	1	1	741.855	2963.39	4	2962.38	1.0088	350	376	0	60.41	35	3.3e-05	R	IDEEQTVEDAEDGPPELLFIHGGHTSK	I
1	RBR1	NGSrhino	Q Exactive	71	no	AT5G58230	Symbols: MSI1, MEE70, ATMSI1 | Transducin/WD40 repeat-like superfamily protein | chr5:23556112-23557994 FORWARD LENGTH=424	335	48164	8	8	32.1	424	13444	1	1	1	1197.58	3589.73	3	3588.7	1.032	66	97	0	72.43	34	1.7e-06	K	MILGTHTSESEPNYLMLAQVQLPLDDTESEAR	Q	Deamidated (NQ)	0.00000000000000000020000000000000.0
1	RBR1	NGSrhino	Q Exactive	72	yes	AT1G45000	Symbols: | AAA-type ATPase family protein | chr1:17009220-17011607 FORWARD LENGTH=399	333	44727	9	8	28.8	399	722	1	0	1	448.727	895.439	2	895.44	-0.0008	12	19	0	54.2	36	0.00016	R	TAAVTDYR	K
1	RBR1	NGSrhino	Q Exactive	72	yes	AT1G45000	Symbols: | AAA-type ATPase family protein | chr1:17009220-17011607 FORWARD LENGTH=399	333	44727	9	8	28.8	399	999	1	0	0	466.277	930.539	2	930.539	0.0009	204	212	0	44.12	34	0.0011	K	VVSSAIIDK	Y
1	RBR1	NGSrhino	Q Exactive	72	yes	AT1G45000	Symbols: | AAA-type ATPase family protein | chr1:17009220-17011607 FORWARD LENGTH=399	333	44727	9	8	28.8	399	2797	1	0	0	579.831	1157.65	2	1157.64	0.0035	175	186	0	39.98	35	0.0035	K	GVLLYGPPGTGK	T
1	RBR1	NGSrhino	Q Exactive	72	yes	AT1G45000	Symbols: | AAA-type ATPase family protein | chr1:17009220-17011607 FORWARD LENGTH=399	333	44727	9	8	28.8	399	3801	1	0	0	637.326	1272.64	2	1272.63	0.0024	329	339	0	71.33	35	2.8e-06	K	HGEIDYEAIVK	L
1	RBR1	NGSrhino	Q Exactive	72	yes	AT1G45000	Symbols: | AAA-type ATPase family protein | chr1:17009220-17011607 FORWARD LENGTH=399	333	44727	9	8	28.8	399	5197	1	0	0	727.826	1453.64	2	1453.65	-0.0095	386	398	0	74.1	34	1e-06	K	LESSSHYNADFGK	E
1	RBR1	NGSrhino	Q Exactive	72	yes	AT1G45000	Symbols: | AAA-type ATPase family protein | chr1:17009220-17011607 FORWARD LENGTH=399	333	44727	9	8	28.8	399	7546	1	0	0	900.982	1799.95	2	1799.95	0.001	153	167	0	54.95	35	0.0001	R	ESIELPLMNPELFLR	V
1	RBR1	NGSrhino	Q Exactive	72	yes	AT1G45000	Symbols: | AAA-type ATPase family protein | chr1:17009220-17011607 FORWARD LENGTH=399	333	44727	9	8	28.8	399	8318	1	1	1	967.996	1933.98	2	1933.98	-0.0036	262	278	0	85.25	36	1.4e-07	R	TLMELLNQLDGFDQLGK	V
1	RBR1	NGSrhino	Q Exactive	72	yes	AT1G45000	Symbols: | AAA-type ATPase family protein | chr1:17009220-17011607 FORWARD LENGTH=399	333	44727	9	8	28.8	399	13036	1	0	0	1082.19	3243.56	3	3243.55	0.0101	120	149	0	74.3	35	1.3e-06	R	EVDPVVYNMLHEDPGNISYSAVGGLGDQIR	E
1	RBR1	NGSrhino	Q Exactive	73	yes	AT5G35530	Symbols: | Ribosomal protein S3 family protein | chr5:13710355-13712192 REVERSE LENGTH=248	327	27441	9	8	33.1	248	508	1	0	0	434.716	867.417	2	867.416	0.0005	125	132	0	49.7	35	0.00038	R	FVMESGAK	G
1	RBR1	NGSrhino	Q Exactive	73	yes	AT5G35530	Symbols: | Ribosomal protein S3 family protein | chr5:13710355-13712192 REVERSE LENGTH=248	327	27441	9	8	33.1	248	676	1	0	0	444.742	887.47	2	887.471	-0.0013	55	62	0	41.6	36	0.0034	R	TQNVLGEK	G
1	RBR1	NGSrhino	Q Exactive	73	yes	AT5G35530	Symbols: | Ribosomal protein S3 family protein | chr5:13710355-13712192 REVERSE LENGTH=248	327	27441	9	8	33.1	248	900	1	0	0	459.269	916.524	2	916.523	0.0007	68	75	0	47.33	35	0.00071	R	ELTSLVQK	R
1	RBR1	NGSrhino	Q Exactive	73	yes	AT5G35530	Symbols: | Ribosomal protein S3 family protein | chr5:13710355-13712192 REVERSE LENGTH=248	327	27441	9	8	33.1	248	1031	1	0	0	468.743	935.471	2	935.471	0.0001	166	173	0	45.57	36	0.0013	K	EYIDAAVR	H
1	RBR1	NGSrhino	Q Exactive	73	yes	AT5G35530	Symbols: | Ribosomal protein S3 family protein | chr5:13710355-13712192 REVERSE LENGTH=248	327	27441	9	8	33.1	248	1639	1	1	1	509.257	1016.5	2	1016.5	0.0004	188	195	0	43.07	35	0.0018	K	IMLDWDPK	G
1	RBR1	NGSrhino	Q Exactive	73	yes	AT5G35530	Symbols: | Ribosomal protein S3 family protein | chr5:13710355-13712192 REVERSE LENGTH=248	327	27441	9	8	33.1	248	3773	1	0	0	635.293	1268.57	2	1268.57	-0.0001	154	165	0	49.41	35	0.00037	K	DGYMVSSGQPTK	E
1	RBR1	NGSrhino	Q Exactive	73	yes	AT5G35530	Symbols: | Ribosomal protein S3 family protein | chr5:13710355-13712192 REVERSE LENGTH=248	327	27441	9	8	33.1	248	4933	1	0	0	712.339	1422.66	2	1422.66	0.0004	28	40	0	88.6	36	6.2e-08	R	ELAEDGYSGVEVR	V
1	RBR1	NGSrhino	Q Exactive	73	yes	AT5G35530	Symbols: | Ribosomal protein S3 family protein | chr5:13710355-13712192 REVERSE LENGTH=248	327	27441	9	8	33.1	248	8350	1	0	0	648.335	1941.98	3	1941.98	0.0001	11	27	0	107.98	36	6.4e-10	K	FVADGVFYAELNEVLTR	E
1	RBR1	NGSrhino	Q Exactive	74	yes	AT5G24710	Symbols: | Transducin/WD40 repeat-like superfamily protein | chr5:8459148-8467920 REVERSE LENGTH=1377	323	147978	7	7	7.6	1377	1355	1	1	1	490.767	979.52	2	979.52	0.0006	1046	1054	0	60.13	35	3.2e-05	K	GALQGHELR	G
1	RBR1	NGSrhino	Q Exactive	74	yes	AT5G24710	Symbols: | Transducin/WD40 repeat-like superfamily protein | chr5:8459148-8467920 REVERSE LENGTH=1377	323	147978	7	7	7.6	1377	2952	1	1	1	589.834	1177.65	2	1177.65	-0.0002	144	153	0	52.76	33	0.00012	K	AIFLDLVTMR	G
1	RBR1	NGSrhino	Q Exactive	74	yes	AT5G24710	Symbols: | Transducin/WD40 repeat-like superfamily protein | chr5:8459148-8467920 REVERSE LENGTH=1377	323	147978	7	7	7.6	1377	5227	1	1	1	728.904	1455.79	2	1455.79	-0.0007	274	288	0	80.04	34	2.6e-07	R	VSGSAPQLITIGADK	T
1	RBR1	NGSrhino	Q Exactive	74	yes	AT5G24710	Symbols: | Transducin/WD40 repeat-like superfamily protein | chr5:8459148-8467920 REVERSE LENGTH=1377	323	147978	7	7	7.6	1377	5251	1	1	1	730.894	1459.77	2	1459.77	0.0039	580	592	0	82.36	36	2.5e-07	R	ILLDDGTSNILMR	S
1	RBR1	NGSrhino	Q Exactive	74	yes	AT5G24710	Symbols: | Transducin/WD40 repeat-like superfamily protein | chr5:8459148-8467920 REVERSE LENGTH=1377	323	147978	7	7	7.6	1377	5864	1	1	1	763.461	1524.91	2	1524.9	0.0087	1069	1083	0	84.47	26	1.6e-08	R	LSGLVNNLISIGLGR	E
1	RBR1	NGSrhino	Q Exactive	74	yes	AT5G24710	Symbols: | Transducin/WD40 repeat-like superfamily protein | chr5:8459148-8467920 REVERSE LENGTH=1377	323	147978	7	7	7.6	1377	8800	1	1	1	665.355	1993.04	3	1993.05	-0.0038	775	794	0	45.99	34	0.00072	R	AVAEHGELALITVEGSQAAK	Q
1	RBR1	NGSrhino	Q Exactive	74	yes	AT5G24710	Symbols: | Transducin/WD40 repeat-like superfamily protein | chr5:8459148-8467920 REVERSE LENGTH=1377	323	147978	7	7	7.6	1377	10406	1	1	1	765.434	2293.28	3	2293.28	0.0048	1170	1191	1	83.03	28	3.9e-08	R	KPPIEILPPGMSSIFASITAPK	K
1	RBR1	NGSrhino	Q Exactive	75	yes	AT5G18700	Symbols: RUK, EMB3013 | Protein kinase family protein with ARM repeat domain | chr5:6235387-6240733 REVERSE LENGTH=1366	308	152187	7	7	6.7	1366	2507	1	1	1	562.257	1122.5	2	1122.5	0.0005	426	434	0	53.61	34	0.00013	R	VMSHNENHR	R
1	RBR1	NGSrhino	Q Exactive	75	yes	AT5G18700	Symbols: RUK, EMB3013 | Protein kinase family protein with ARM repeat domain | chr5:6235387-6240733 REVERSE LENGTH=1366	308	152187	7	7	6.7	1366	3992	1	1	1	646.349	1290.68	2	1290.68	0.0015	1272	1283	0	56.84	36	8.8e-05	R	EATTGFLTNLPK	I
1	RBR1	NGSrhino	Q Exactive	75	yes	AT5G18700	Symbols: RUK, EMB3013 | Protein kinase family protein with ARM repeat domain | chr5:6235387-6240733 REVERSE LENGTH=1366	308	152187	7	7	6.7	1366	4027	1	1	1	648.422	1294.83	2	1294.83	-0.0041	618	629	0	77.27	21	2.4e-08	R	VQIASLIGLLIR	H
1	RBR1	NGSrhino	Q Exactive	75	yes	AT5G18700	Symbols: RUK, EMB3013 | Protein kinase family protein with ARM repeat domain | chr5:6235387-6240733 REVERSE LENGTH=1366	308	152187	7	7	6.7	1366	4255	1	1	1	665.815	1329.62	2	1329.62	-0.0004	490	502	0	99.32	35	3.8e-09	R	ETSGVAVNHDSSK	A
1	RBR1	NGSrhino	Q Exactive	75	yes	AT5G18700	Symbols: RUK, EMB3013 | Protein kinase family protein with ARM repeat domain | chr5:6235387-6240733 REVERSE LENGTH=1366	308	152187	7	7	6.7	1366	4539	1	1	1	688.413	1374.81	2	1374.81	-0.0006	225	236	0	58.47	27	8.9e-06	R	SFVNLIESLLIK	D
1	RBR1	NGSrhino	Q Exactive	75	yes	AT5G18700	Symbols: RUK, EMB3013 | Protein kinase family protein with ARM repeat domain | chr5:6235387-6240733 REVERSE LENGTH=1366	308	152187	7	7	6.7	1366	5378	1	1	1	739.409	1476.8	2	1476.8	0.0007	561	575	0	63.31	34	1.2e-05	R	IITVLSGSSSGLSEK	Q
1	RBR1	NGSrhino	Q Exactive	75	yes	AT5G18700	Symbols: RUK, EMB3013 | Protein kinase family protein with ARM repeat domain | chr5:6235387-6240733 REVERSE LENGTH=1366	308	152187	7	7	6.7	1366	8983	1	1	1	1015.07	2028.13	2	2028.13	0.0013	839	856	0	52.3	30	6.4e-05	K	NLFPSLLSIIEQGTEVLR	G
1	RBR1	NGSrhino	Q Exactive	76	yes	AT3G12050	Symbols: | Aha1 domain-containing protein | chr3:3839289-3841303 FORWARD LENGTH=360	303	40160	6	6	25.3	360	3051	1	1	1	595.326	1188.64	2	1188.63	0.003	182	194	0	91.62	36	2.8e-08	K	SVAAGSATVAVEK	S
1	RBR1	NGSrhino	Q Exactive	76	yes	AT3G12050	Symbols: | Aha1 domain-containing protein | chr3:3839289-3841303 FORWARD LENGTH=360	303	40160	6	6	25.3	360	4391	1	1	1	676.826	1351.64	2	1351.64	0.001	331	342	0	68.8	36	6e-06	R	YGNATVVENTER	G
1	RBR1	NGSrhino	Q Exactive	76	yes	AT3G12050	Symbols: | Aha1 domain-containing protein | chr3:3839289-3841303 FORWARD LENGTH=360	303	40160	6	6	25.3	360	4816	1	1	1	704.841	1407.67	2	1407.67	0	293	305	0	61.84	36	3.1e-05	R	FGSWPDGLDSTVK	I
1	RBR1	NGSrhino	Q Exactive	76	yes	AT3G12050	Symbols: | Aha1 domain-containing protein | chr3:3839289-3841303 FORWARD LENGTH=360	303	40160	6	6	25.3	360	4831	1	1	1	705.832	1409.65	2	1409.65	0	238	248	0	70.72	36	3.6e-06	R	DLYEILMDENR	W
1	RBR1	NGSrhino	Q Exactive	76	yes	AT3G12050	Symbols: | Aha1 domain-containing protein | chr3:3839289-3841303 FORWARD LENGTH=360	303	40160	6	6	25.3	360	7714	1	1	1	912.484	1822.95	2	1822.95	0.0061	43	59	0	78.76	35	4.3e-07	K	QFSGVDILSGEGNLFIK	V
1	RBR1	NGSrhino	Q Exactive	76	yes	AT3G12050	Symbols: | Aha1 domain-containing protein | chr3:3839289-3841303 FORWARD LENGTH=360	303	40160	6	6	25.3	360	12237	1	1	1	945.482	2833.43	3	2833.41	0.0118	306	330	0	65.08	34	8.5e-06	K	IVFEEPQPGVTIVNLTHTDVPEEDR	Y
1	RBR1	NGSrhino	Q Exactive	77	yes	AT3G44110	Symbols: ATJ3, ATJ | DNAJ homologue 3 | chr3:15869115-15871059 REVERSE LENGTH=420	296	46415	8	7	22.6	420	335	1	1	1	423.714	845.413	2	845.413	-0.0004	24	31	0	40.75	35	0.0028	K	SASPEDLK	K
1	RBR1	NGSrhino	Q Exactive	77	yes	AT3G44110	Symbols: ATJ3, ATJ | DNAJ homologue 3 | chr3:15869115-15871059 REVERSE LENGTH=420	296	46415	8	7	22.6	420	981	1	1	0	465.269	928.523	2	928.523	-0.0001	221	228	0	44.03	33	0.00094	K	VLEVNVEK	G
1	RBR1	NGSrhino	Q Exactive	77	yes	AT3G44110	Symbols: ATJ3, ATJ | DNAJ homologue 3 | chr3:15869115-15871059 REVERSE LENGTH=420	296	46415	8	7	22.6	420	1997	1	1	0	533.303	1064.59	2	1064.59	0.0018	15	23	0	42.38	32	0.0011	K	FYEILGVPK	S
1	RBR1	NGSrhino	Q Exactive	77	yes	AT3G44110	Symbols: ATJ3, ATJ | DNAJ homologue 3 | chr3:15869115-15871059 REVERSE LENGTH=420	296	46415	8	7	22.6	420	4560	1	1	0	690.335	1378.66	2	1378.66	0.0004	316	327	0	70.06	36	4.6e-06	K	AISDEGMPIYQR	P
1	RBR1	NGSrhino	Q Exactive	77	yes	AT3G44110	Symbols: ATJ3, ATJ | DNAJ homologue 3 | chr3:15869115-15871059 REVERSE LENGTH=420	296	46415	8	7	22.6	420	4896	1	1	1	710.361	1418.71	2	1418.7	0.0038	303	315	1	87.6	37	8.9e-08	K	SNPGEVVKPDSYK	A
1	RBR1	NGSrhino	Q Exactive	77	yes	AT3G44110	Symbols: ATJ3, ATJ | DNAJ homologue 3 | chr3:15869115-15871059 REVERSE LENGTH=420	296	46415	8	7	22.6	420	6256	1	1	0	796.396	1590.78	2	1590.78	0.0008	54	67	0	60.88	37	4.2e-05	K	ELAQAYEVLSDPEK	R
1	RBR1	NGSrhino	Q Exactive	77	yes	AT3G44110	Symbols: ATJ3, ATJ | DNAJ homologue 3 | chr3:15869115-15871059 REVERSE LENGTH=420	296	46415	8	7	22.6	420	12668	1	1	1	1002.44	3004.28	3	3004.28	0.0011	81	111	0	93.68	31	5.7e-09	K	EGMGGGGGGHDPFDIFSSFFGGGPFGGNTSR	Q
1	RBR1	NGSrhino	Q Exactive	78	yes	AT5G53480	Symbols: | ARM repeat superfamily protein | chr5:21714016-21716709 FORWARD LENGTH=870	294	96197	5	3	6.8	870	4291	1	1	1	668.348	1334.68	2	1334.68	-0.0013	524	535	0	50.55	37	0.00053	R	TAAYEALNEVVR	C
1	RBR1	NGSrhino	Q Exactive	78	yes	AT5G53480	Symbols: | ARM repeat superfamily protein | chr5:21714016-21716709 FORWARD LENGTH=870	294	96197	5	3	6.8	870	9442	1	1	1	1051.05	2100.08	2	2100.09	-0.0064	2	20	0	93.06	35	1.7e-08	M	AMEVTQLLINAQSIDGTVR	K	Acetyl (Protein N-term)	1.0000000000000000000.0
1	RBR1	NGSrhino	Q Exactive	78	yes	AT5G53480	Symbols: | ARM repeat superfamily protein | chr5:21714016-21716709 FORWARD LENGTH=870	294	96197	5	3	6.8	870	11835	1	1	1	908.49	2722.45	3	2722.45	-0.0005	812	839	0	83.38	31	6.5e-08	K	TAIGVLGDLADTLGSHVGGLIQQSVSSK	E
1	RBR1	NGSrhino	Q Exactive	79	yes	AT3G22330	Symbols: PMH2, ATRH53 | putative mitochondrial RNA helicase 2 | chr3:7892641-7895145 FORWARD LENGTH=616	292	65319	8	8	15.4	616	855	1	1	1	456.703	911.392	2	911.392	0	494	503	0	50.43	31	0.00013	R	SGGSFGGGMR	D
1	RBR1	NGSrhino	Q Exactive	79	yes	AT3G22330	Symbols: PMH2, ATRH53 | putative mitochondrial RNA helicase 2 | chr3:7892641-7895145 FORWARD LENGTH=616	292	65319	8	8	15.4	616	2039	1	1	0	536.777	1071.54	2	1071.54	0.0015	133	142	0	43.22	35	0.0016	K	AVLEPAMEGR	D
1	RBR1	NGSrhino	Q Exactive	79	yes	AT3G22330	Symbols: PMH2, ATRH53 | putative mitochondrial RNA helicase 2 | chr3:7892641-7895145 FORWARD LENGTH=616	292	65319	8	8	15.4	616	2567	1	1	1	566.241	1130.47	2	1130.46	0.0044	584	594	0	57.27	29	1.9e-05	R	SSGFGDFGSDR	S
1	RBR1	NGSrhino	Q Exactive	79	yes	AT3G22330	Symbols: PMH2, ATRH53 | putative mitochondrial RNA helicase 2 | chr3:7892641-7895145 FORWARD LENGTH=616	292	65319	8	8	15.4	616	2799	1	1	0	580.255	1158.5	2	1158.49	0.0022	602	613	0	34.96	31	0.0043	R	SSFGGFGSNDGK	R
1	RBR1	NGSrhino	Q Exactive	79	yes	AT3G22330	Symbols: PMH2, ATRH53 | putative mitochondrial RNA helicase 2 | chr3:7892641-7895145 FORWARD LENGTH=616	292	65319	8	8	15.4	616	3037	1	1	0	594.357	1186.7	2	1186.7	0.0029	155	165	0	51.78	30	8.2e-05	K	TLAFGIPIIDK	I
1	RBR1	NGSrhino	Q Exactive	79	yes	AT3G22330	Symbols: PMH2, ATRH53 | putative mitochondrial RNA helicase 2 | chr3:7892641-7895145 FORWARD LENGTH=616	292	65319	8	8	15.4	616	3675	1	1	1	631.344	1260.67	2	1260.67	0.0017	471	481	0	75.15	36	1.2e-06	R	FTELPSIAVER	G
1	RBR1	NGSrhino	Q Exactive	79	yes	AT3G22330	Symbols: PMH2, ATRH53 | putative mitochondrial RNA helicase 2 | chr3:7892641-7895145 FORWARD LENGTH=616	292	65319	8	8	15.4	616	4292	1	1	1	668.385	1334.75	2	1334.76	-0.0009	336	348	0	37.15	31	0.0029	R	ASIIGPLVTEHAK	G
1	RBR1	NGSrhino	Q Exactive	79	yes	AT3G22330	Symbols: PMH2, ATRH53 | putative mitochondrial RNA helicase 2 | chr3:7892641-7895145 FORWARD LENGTH=616	292	65319	8	8	15.4	616	4647	1	1	1	695.292	1388.57	2	1388.57	-0.0003	513	529	0	112.51	29	4.5e-11	R	SGGGGYGGSSGGYGGGR	S
1	RBR1	NGSrhino	Q Exactive	80	yes	AT3G05530	Symbols: RPT5A, ATS6A.2 | regulatory particle triple-A ATPase 5A | chr3:1603540-1605993 FORWARD LENGTH=424	289	47450	6	6	22.4	424	2797	1	0	0	579.831	1157.65	2	1157.64	0.0035	207	218	0	39.98	35	0.0035	K	GVLLYGPPGTGK	T
1	RBR1	NGSrhino	Q Exactive	80	yes	AT3G05530	Symbols: RPT5A, ATS6A.2 | regulatory particle triple-A ATPase 5A | chr3:1603540-1605993 FORWARD LENGTH=424	289	47450	6	6	22.4	424	6790	1	1	1	557.603	1669.79	3	1669.79	0.0001	358	371	0	94.34	36	1.5e-08	K	MNVHPDVNFEELAR	S
1	RBR1	NGSrhino	Q Exactive	80	yes	AT3G05530	Symbols: RPT5A, ATS6A.2 | regulatory particle triple-A ATPase 5A | chr3:1603540-1605993 FORWARD LENGTH=424	289	47450	6	6	22.4	424	7851	1	1	1	617.014	1848.02	3	1848.02	0.0022	179	194	0	44.56	31	0.00049	K	QIQELVEAIVLPMTHK	E
1	RBR1	NGSrhino	Q Exactive	80	yes	AT3G05530	Symbols: RPT5A, ATS6A.2 | regulatory particle triple-A ATPase 5A | chr3:1603540-1605993 FORWARD LENGTH=424	289	47450	6	6	22.4	424	8083	1	1	1	943.96	1885.9	2	1885.89	0.0104	141	156	0	55.4	36	0.00012	K	DSYLILDTLPSEYDSR	V
1	RBR1	NGSrhino	Q Exactive	80	yes	AT3G05530	Symbols: RPT5A, ATS6A.2 | regulatory particle triple-A ATPase 5A | chr3:1603540-1605993 FORWARD LENGTH=424	289	47450	6	6	22.4	424	8664	1	1	1	984.471	1966.93	2	1966.93	-0.0038	294	310	0	120.6	36	3.6e-11	R	TMLELLNQLDGFSSDER	I
1	RBR1	NGSrhino	Q Exactive	80	yes	AT3G05530	Symbols: RPT5A, ATS6A.2 | regulatory particle triple-A ATPase 5A | chr3:1603540-1605993 FORWARD LENGTH=424	289	47450	6	6	22.4	424	10255	1	1	1	751.681	2252.02	3	2252.02	0.0045	159	178	1	66.43	35	7.5e-06	K	AMEVDEKPTEDYNDIGGLEK	Q
1	RBR1	NGSrhino	Q Exactive	81	yes	AT2G17130	Symbols: IDH2, IDH-II | isocitrate dehydrogenase subunit 2 | chr2:7461062-7462466 REVERSE LENGTH=367	288	39565	5	5	18.8	367	3091	1	0	0	597.337	1192.66	2	1192.66	0.0022	138	147	0	73.98	33	9.5e-07	R	HENVDIVVIR	E
1	RBR1	NGSrhino	Q Exactive	81	yes	AT2G17130	Symbols: IDH2, IDH-II | isocitrate dehydrogenase subunit 2 | chr2:7461062-7462466 REVERSE LENGTH=367	288	39565	5	5	18.8	367	3296	1	0	0	609.306	1216.6	2	1216.6	-0.0011	321	330	0	37.5	36	0.0072	R	HLQFPSFADR	L
1	RBR1	NGSrhino	Q Exactive	81	yes	AT2G17130	Symbols: IDH2, IDH-II | isocitrate dehydrogenase subunit 2 | chr2:7461062-7462466 REVERSE LENGTH=367	288	39565	5	5	18.8	367	4932	1	0	0	712.337	1422.66	2	1422.66	0.0025	183	193	0	75.73	36	1.1e-06	K	YAFEYAYLNNR	K
1	RBR1	NGSrhino	Q Exactive	81	yes	AT2G17130	Symbols: IDH2, IDH-II | isocitrate dehydrogenase subunit 2 | chr2:7461062-7462466 REVERSE LENGTH=367	288	39565	5	5	18.8	367	5302	1	1	1	735.407	1468.8	2	1468.8	-0.0004	102	116	0	95.04	33	7.5e-09	K	TPVGGGVSSLNVNLR	K
1	RBR1	NGSrhino	Q Exactive	81	yes	AT2G17130	Symbols: IDH2, IDH-II | isocitrate dehydrogenase subunit 2 | chr2:7461062-7462466 REVERSE LENGTH=367	288	39565	5	5	18.8	367	11151	1	0	0	1243.11	2484.2	2	2484.2	-0.0003	148	170	0	105.42	36	1.2e-09	R	ENTEGEYAGLEHEVVPGVVESLK	V
1	RBR1	NGSrhino	Q Exactive	82	yes	AT2G39730	Symbols: RCA | rubisco activase | chr2:16570951-16573345 REVERSE LENGTH=474	287	51948	6	6	20	474	1568	1	1	1	504.275	1006.54	2	1006.53	0.0026	360	368	0	47.34	36	0.0009	K	FVESLGVEK	I
1	RBR1	NGSrhino	Q Exactive	82	yes	AT2G39730	Symbols: RCA | rubisco activase | chr2:16570951-16573345 REVERSE LENGTH=474	287	51948	6	6	20	474	2741	1	1	1	576.861	1151.71	2	1151.71	0.0006	157	167	0	49.45	24	3.1e-05	K	VPLILGIWGGK	G
1	RBR1	NGSrhino	Q Exactive	82	yes	AT2G39730	Symbols: RCA | rubisco activase | chr2:16570951-16573345 REVERSE LENGTH=474	287	51948	6	6	20	474	6927	1	1	1	849.385	1696.76	2	1696.75	0.002	73	87	0	123.24	35	1.5e-11	R	GLAYDTSDDQQDITR	G
1	RBR1	NGSrhino	Q Exactive	82	yes	AT2G39730	Symbols: RCA | rubisco activase | chr2:16570951-16573345 REVERSE LENGTH=474	287	51948	6	6	20	474	7360	1	1	1	890.908	1779.8	2	1779.8	-0.0002	378	392	0	70.07	35	3.5e-06	R	EGPPVFEQPEMTYEK	L
1	RBR1	NGSrhino	Q Exactive	82	yes	AT2G39730	Symbols: RCA | rubisco activase | chr2:16570951-16573345 REVERSE LENGTH=474	287	51948	6	6	20	474	10847	1	1	1	1192.52	2383.02	2	2383.03	-0.013	121	140	0	87.54	31	2.6e-08	R	QYNLDNMMDGFYIAPAFMDK	L
1	RBR1	NGSrhino	Q Exactive	82	yes	AT2G39730	Symbols: RCA | rubisco activase | chr2:16570951-16573345 REVERSE LENGTH=474	287	51948	6	6	20	474	12173	1	1	1	941.823	2822.45	3	2822.45	-0.0026	325	349	1	40.96	33	0.0018	K	IKDEDIVTLVDQFPGQSIDFFGALR	A
1	RBR1	NGSrhino	Q Exactive	83	yes	AT1G64790	Symbols: ILA | ILITYHIA | chr1:24065232-24081908 REVERSE LENGTH=2610	285	284599	7	5	2.6	2610	169	1	1	1	412.735	823.455	2	823.455	-0.0007	1280	1286	0	38.66	32	0.0022	K	VHNVVEK	L
1	RBR1	NGSrhino	Q Exactive	83	yes	AT1G64790	Symbols: ILA | ILITYHIA | chr1:24065232-24081908 REVERSE LENGTH=2610	285	284599	7	5	2.6	2610	3212	1	1	1	603.418	1204.82	2	1204.82	0.0064	1902	1912	0	42.63	20	5.5e-05	R	VLPLIIPILSK	G
1	RBR1	NGSrhino	Q Exactive	83	yes	AT1G64790	Symbols: ILA | ILITYHIA | chr1:24065232-24081908 REVERSE LENGTH=2610	285	284599	7	5	2.6	2610	5171	1	1	1	724.905	1447.8	2	1447.79	0.0042	1775	1787	0	72.2	33	1.2e-06	R	QSSVELLGDLLFK	V
1	RBR1	NGSrhino	Q Exactive	83	yes	AT1G64790	Symbols: ILA | ILITYHIA | chr1:24065232-24081908 REVERSE LENGTH=2610	285	284599	7	5	2.6	2610	9189	1	1	1	1025.06	2048.1	2	2048.1	0.0014	957	974	0	71.08	32	1.5e-06	K	SGPLPVDTFTFIFPILER	I
1	RBR1	NGSrhino	Q Exactive	83	yes	AT1G64790	Symbols: ILA | ILITYHIA | chr1:24065232-24081908 REVERSE LENGTH=2610	285	284599	7	5	2.6	2610	9437	1	1	1	1049.6	2097.18	2	2097.18	-0.0054	2083	2101	0	87.87	29	1.4e-08	R	VVLVIDEEGVETLLSELLK	G
1	RBR1	NGSrhino	Q Exactive	84	yes	AT3G02260	Symbols: BIG, DOC1, TIR3, UMB1, ASA1, LPR1, CRM1 | auxin transport protein (BIG) | chr3:431152-448489 REVERSE LENGTH=5098	284	567527	5	5	1.5	5098	3639	1	1	1	628.884	1255.75	2	1255.75	0.0024	4357	4368	0	100.22	28	7e-10	R	LGALSLLLETAR	R
1	RBR1	NGSrhino	Q Exactive	84	yes	AT3G02260	Symbols: BIG, DOC1, TIR3, UMB1, ASA1, LPR1, CRM1 | auxin transport protein (BIG) | chr3:431152-448489 REVERSE LENGTH=5098	284	567527	5	5	1.5	5098	5577	1	1	1	747.401	1492.79	2	1492.78	0.002	4309	4321	0	55.1	35	0.00011	R	EYGGLEILLDMIK	S
1	RBR1	NGSrhino	Q Exactive	84	yes	AT3G02260	Symbols: BIG, DOC1, TIR3, UMB1, ASA1, LPR1, CRM1 | auxin transport protein (BIG) | chr3:431152-448489 REVERSE LENGTH=5098	284	567527	5	5	1.5	5098	6962	1	1	1	569.005	1703.99	3	1703.99	0.0003	4070	4084	0	96.21	24	7.2e-10	R	DNLLSHVLEALIVIR	G
1	RBR1	NGSrhino	Q Exactive	84	yes	AT3G02260	Symbols: BIG, DOC1, TIR3, UMB1, ASA1, LPR1, CRM1 | auxin transport protein (BIG) | chr3:431152-448489 REVERSE LENGTH=5098	284	567527	5	5	1.5	5098	8861	1	1	1	667.042	1998.1	3	1998.12	-0.0106	1319	1336	0	78.05	30	1.6e-07	K	VLNFLVDLLSVAQSPDLR	R
1	RBR1	NGSrhino	Q Exactive	84	yes	AT3G02260	Symbols: BIG, DOC1, TIR3, UMB1, ASA1, LPR1, CRM1 | auxin transport protein (BIG) | chr3:431152-448489 REVERSE LENGTH=5098	284	567527	5	5	1.5	5098	9586	1	1	1	710.393	2128.16	3	2128.16	-0.0023	1179	1197	0	51.72	32	0.00011	K	FGVDTSVLHQLLDSIMIIK	F
1	RBR1	NGSrhino	Q Exactive	85	no	AT3G05380	Symbols: ALY2, ATALY2 | DIRP ;Myb-like DNA-binding domain | chr3:1540562-1546139 FORWARD LENGTH=1051	276	117707	7	5	10.3	1051	5634	1	1	1	752.869	1503.72	2	1503.72	0.0023	487	500	0	42.02	36	0.003	K	VLGDEAPAEFSQNK	S
1	RBR1	NGSrhino	Q Exactive	85	no	AT3G05380	Symbols: ALY2, ATALY2 | DIRP ;Myb-like DNA-binding domain | chr3:1540562-1546139 FORWARD LENGTH=1051	276	117707	7	5	10.3	1051	8705	1	1	1	987.989	1973.96	2	1973.96	0.0022	913	930	0	69.03	36	5.6e-06	K	EGEDVNTMIQEALELVGK	N
1	RBR1	NGSrhino	Q Exactive	85	no	AT3G05380	Symbols: ALY2, ATALY2 | DIRP ;Myb-like DNA-binding domain | chr3:1540562-1546139 FORWARD LENGTH=1051	276	117707	7	5	10.3	1051	10262	1	1	1	751.736	2252.18	3	2252.18	0.0047	1003	1023	0	91.07	34	2e-08	R	QYPPADVAQLIDAAVTSLQPR	C
1	RBR1	NGSrhino	Q Exactive	85	no	AT3G05380	Symbols: ALY2, ATALY2 | DIRP ;Myb-like DNA-binding domain | chr3:1540562-1546139 FORWARD LENGTH=1051	276	117707	7	5	10.3	1051	10397	1	1	1	764.375	2290.1	3	2289.1	0.9995	209	229	0	61.45	36	3.5e-05	K	QFDANDDVAHFLALALTDASR	R
1	RBR1	NGSrhino	Q Exactive	85	no	AT3G05380	Symbols: ALY2, ATALY2 | DIRP ;Myb-like DNA-binding domain | chr3:1540562-1546139 FORWARD LENGTH=1051	276	117707	7	5	10.3	1051	13431	1	1	1	1182.93	3545.77	3	3544.74	1.0274	371	404	0	49.93	34	0.00026	K	HTSGAFDALQALAELSASMLPANLMESELSAQLK	E	Deamidated (NQ)	0.0000000000000000000000200000000000.0
1	RBR1	NGSrhino	Q Exactive	86	yes	AT2G24050	Symbols: eIFiso4G2 | MIF4G domain-containing protein / MA3 domain-containing protein | chr2:10225500-10228456 REVERSE LENGTH=747	274	82838	11	11	14.7	747	423	1	1	1	429.278	856.542	2	856.538	0.0033	714	721	0	39.87	31	0.0014	K	TVLNAVIK	S
1	RBR1	NGSrhino	Q Exactive	86	yes	AT2G24050	Symbols: eIFiso4G2 | MIF4G domain-containing protein / MA3 domain-containing protein | chr2:10225500-10228456 REVERSE LENGTH=747	274	82838	11	11	14.7	747	951	1	1	1	462.748	923.481	2	923.482	-0.0011	62	68	0	66.05	36	1e-05	R	EEILQHR	E
1	RBR1	NGSrhino	Q Exactive	86	yes	AT2G24050	Symbols: eIFiso4G2 | MIF4G domain-containing protein / MA3 domain-containing protein | chr2:10225500-10228456 REVERSE LENGTH=747	274	82838	11	11	14.7	747	1425	1	1	1	495.281	988.547	2	988.544	0.0032	622	630	0	45.91	37	0.0013	K	ETISLGLEK	N
1	RBR1	NGSrhino	Q Exactive	86	yes	AT2G24050	Symbols: eIFiso4G2 | MIF4G domain-containing protein / MA3 domain-containing protein | chr2:10225500-10228456 REVERSE LENGTH=747	274	82838	11	11	14.7	747	1437	1	1	1	495.785	989.555	2	989.555	0.0007	693	700	0	43.27	34	0.0012	K	VLDFELVR	D
1	RBR1	NGSrhino	Q Exactive	86	yes	AT2G24050	Symbols: eIFiso4G2 | MIF4G domain-containing protein / MA3 domain-containing protein | chr2:10225500-10228456 REVERSE LENGTH=747	274	82838	11	11	14.7	747	1561	1	1	1	503.762	1005.51	2	1005.51	-0.0002	104	111	0	41.53	37	0.0035	K	ITNHTQHR	H
1	RBR1	NGSrhino	Q Exactive	86	yes	AT2G24050	Symbols: eIFiso4G2 | MIF4G domain-containing protein / MA3 domain-containing protein | chr2:10225500-10228456 REVERSE LENGTH=747	274	82838	11	11	14.7	747	3118	1	1	1	599.296	1196.58	2	1196.58	-0.0017	413	422	0	37.86	36	0.0073	K	INEIHSEAER	N
1	RBR1	NGSrhino	Q Exactive	86	yes	AT2G24050	Symbols: eIFiso4G2 | MIF4G domain-containing protein / MA3 domain-containing protein | chr2:10225500-10228456 REVERSE LENGTH=747	274	82838	11	11	14.7	747	3317	1	1	1	610.827	1219.64	2	1219.64	0.0002	388	397	0	67.97	36	7.6e-06	R	FMVQNVVDLR	A
1	RBR1	NGSrhino	Q Exactive	86	yes	AT2G24050	Symbols: eIFiso4G2 | MIF4G domain-containing protein / MA3 domain-containing protein | chr2:10225500-10228456 REVERSE LENGTH=747	274	82838	11	11	14.7	747	3635	1	1	1	628.831	1255.65	2	1255.64	0.0025	589	598	0	45.97	34	0.00078	K	SLLEEYFSIR	L
1	RBR1	NGSrhino	Q Exactive	86	yes	AT2G24050	Symbols: eIFiso4G2 | MIF4G domain-containing protein / MA3 domain-containing protein | chr2:10225500-10228456 REVERSE LENGTH=747	274	82838	11	11	14.7	747	3807	1	1	1	637.834	1273.65	2	1273.65	0.0015	69	79	0	53.23	36	0.00023	R	ESVQVSDEILR	R
1	RBR1	NGSrhino	Q Exactive	86	yes	AT2G24050	Symbols: eIFiso4G2 | MIF4G domain-containing protein / MA3 domain-containing protein | chr2:10225500-10228456 REVERSE LENGTH=747	274	82838	11	11	14.7	747	5306	1	1	1	735.901	1469.79	2	1469.79	-0.0007	143	156	0	53.38	34	0.00014	K	STWQGSGPTPVLIK	A
1	RBR1	NGSrhino	Q Exactive	86	yes	AT2G24050	Symbols: eIFiso4G2 | MIF4G domain-containing protein / MA3 domain-containing protein | chr2:10225500-10228456 REVERSE LENGTH=747	274	82838	11	11	14.7	747	7007	1	1	1	572.981	1715.92	3	1715.92	0.0019	320	334	0	64.89	34	8.2e-06	K	IVHHIVQELLGDDTK	A
1	RBR1	NGSrhino	Q Exactive	87	yes	AT2G19730	Symbols: | Ribosomal L28e protein family | chr2:8511752-8512995 FORWARD LENGTH=143	274	15886	7	5	42	143	1107	1	1	1	473.764	945.514	2	945.513	0.0011	56	64	0	52.96	37	0.00028	K	TVTIQAADK	D
1	RBR1	NGSrhino	Q Exactive	87	yes	AT2G19730	Symbols: | Ribosomal L28e protein family | chr2:8511752-8512995 FORWARD LENGTH=143	274	15886	7	5	42	143	1859	1	1	1	523.3	1044.59	2	1044.58	0.0037	65	74	0	47.65	36	0.00069	K	DQAVVLATTK	T
1	RBR1	NGSrhino	Q Exactive	87	yes	AT2G19730	Symbols: | Ribosomal L28e protein family | chr2:8511752-8512995 FORWARD LENGTH=143	274	15886	7	5	42	143	4901	1	1	1	710.838	1419.66	2	1419.66	-0.0011	36	47	0	77.31	36	8e-07	K	ETNNLTNVHSYK	H	Deamidated (NQ)	0.002000000000.0
1	RBR1	NGSrhino	Q Exactive	87	yes	AT2G19730	Symbols: | Ribosomal L28e protein family | chr2:8511752-8512995 FORWARD LENGTH=143	274	15886	7	5	42	143	5589	1	1	0	748.431	1494.85	2	1494.84	0.0021	2	14	0	56.83	30	2.2e-05	M	ATVPGQLIWEIVK	N	Acetyl (Protein N-term)	1.0000000000000.0
1	RBR1	NGSrhino	Q Exactive	87	yes	AT2G19730	Symbols: | Ribosomal L28e protein family | chr2:8511752-8512995 FORWARD LENGTH=143	274	15886	7	5	42	143	7917	1	1	1	932.981	1863.95	2	1863.95	0.0004	100	115	1	86.54	35	8.7e-08	K	AVANQVVDNYYRPDLK	K
1	RBR1	NGSrhino	Q Exactive	88	yes	AT4G11420	Symbols: EIF3A, ATEIF3A-1, EIF3A-1, ATTIF3A1, TIF3A1 | eukaryotic translation initiation factor 3A | chr4:6947834-6952053 REVERSE LENGTH=987	274	114229	7	6	7.8	987	545	1	1	1	436.744	871.474	2	871.476	-0.0024	608	615	0	39.44	34	0.0029	R	LAAELAER	R
1	RBR1	NGSrhino	Q Exactive	88	yes	AT4G11420	Symbols: EIF3A, ATEIF3A-1, EIF3A-1, ATTIF3A1, TIF3A1 | eukaryotic translation initiation factor 3A | chr4:6947834-6952053 REVERSE LENGTH=987	274	114229	7	6	7.8	987	3058	1	1	1	595.831	1189.65	2	1189.65	0.0012	751	760	0	50	36	0.00043	K	EIFQAQVISR	R
1	RBR1	NGSrhino	Q Exactive	88	yes	AT4G11420	Symbols: EIF3A, ATEIF3A-1, EIF3A-1, ATTIF3A1, TIF3A1 | eukaryotic translation initiation factor 3A | chr4:6947834-6952053 REVERSE LENGTH=987	274	114229	7	6	7.8	987	5320	1	1	1	737.334	1472.65	2	1472.66	-0.0035	336	348	0	98	33	3.9e-09	R	AQSASHMELENEK	E
1	RBR1	NGSrhino	Q Exactive	88	yes	AT4G11420	Symbols: EIF3A, ATEIF3A-1, EIF3A-1, ATTIF3A1, TIF3A1 | eukaryotic translation initiation factor 3A | chr4:6947834-6952053 REVERSE LENGTH=987	274	114229	7	6	7.8	987	5996	1	1	1	518.283	1551.83	3	1551.83	0.0015	24	37	0	60.45	34	2.5e-05	K	QDALQALHDLITSK	R
1	RBR1	NGSrhino	Q Exactive	88	yes	AT4G11420	Symbols: EIF3A, ATEIF3A-1, EIF3A-1, ATTIF3A1, TIF3A1 | eukaryotic translation initiation factor 3A | chr4:6947834-6952053 REVERSE LENGTH=987	274	114229	7	6	7.8	987	6451	1	1	1	816.406	1630.8	2	1630.79	0.0034	628	641	0	67.35	36	8.2e-06	K	ELEEAQALLEETEK	R
1	RBR1	NGSrhino	Q Exactive	88	yes	AT4G11420	Symbols: EIF3A, ATEIF3A-1, EIF3A-1, ATTIF3A1, TIF3A1 | eukaryotic translation initiation factor 3A | chr4:6947834-6952053 REVERSE LENGTH=987	274	114229	7	6	7.8	987	9600	1	1	1	711.695	2132.06	3	2132.07	-0.0056	396	413	0	73.2	36	2.2e-06	K	DLFHVLEHEFHPLDLGSK	I
1	RBR1	NGSrhino	Q Exactive	89	yes	AT1G64520	Symbols: RPN12a | regulatory particle non-ATPase 12A | chr1:23956459-23958120 FORWARD LENGTH=267	272	30687	8	7	36.3	267	1136	1	1	1	477.258	952.502	2	952.502	0.0005	230	237	0	45.87	34	0.00076	K	EGFVVFQK	A
1	RBR1	NGSrhino	Q Exactive	89	yes	AT1G64520	Symbols: RPN12a | regulatory particle non-ATPase 12A | chr1:23956459-23958120 FORWARD LENGTH=267	272	30687	8	7	36.3	267	3658	1	1	1	630.299	1258.58	2	1258.58	0.0015	194	204	0	77.24	34	5.3e-07	K	AYDYVSISDAR	Q
1	RBR1	NGSrhino	Q Exactive	89	yes	AT1G64520	Symbols: RPN12a | regulatory particle non-ATPase 12A | chr1:23956459-23958120 FORWARD LENGTH=267	272	30687	8	7	36.3	267	4521	1	1	1	686.877	1371.74	2	1371.74	0.0004	63	74	0	68.68	34	4.2e-06	R	DIYEHAVVLSVK	T
1	RBR1	NGSrhino	Q Exactive	89	yes	AT1G64520	Symbols: RPN12a | regulatory particle non-ATPase 12A | chr1:23956459-23958120 FORWARD LENGTH=267	272	30687	8	7	36.3	267	7113	1	1	1	866.949	1731.88	2	1731.88	-0.0006	41	56	0	38.76	36	0.0063	K	FTSLPPLFENSPNAAK	E
1	RBR1	NGSrhino	Q Exactive	89	yes	AT1G64520	Symbols: RPN12a | regulatory particle non-ATPase 12A | chr1:23956459-23958120 FORWARD LENGTH=267	272	30687	8	7	36.3	267	8046	1	1	1	627.625	1879.85	3	1879.85	0.0005	144	159	0	72.06	35	2.2e-06	K	HAVELEQSFMEGAYNR	V
1	RBR1	NGSrhino	Q Exactive	89	yes	AT1G64520	Symbols: RPN12a | regulatory particle non-ATPase 12A | chr1:23956459-23958120 FORWARD LENGTH=267	272	30687	8	7	36.3	267	8227	1	1	1	640.046	1917.12	3	1917.1	0.0103	99	115	0	40.17	25	0.00032	R	IPQSPQENLILGLNLLR	L
1	RBR1	NGSrhino	Q Exactive	89	yes	AT1G64520	Symbols: RPN12a | regulatory particle non-ATPase 12A | chr1:23956459-23958120 FORWARD LENGTH=267	272	30687	8	7	36.3	267	8395	1	1	1	973.987	1945.96	2	1945.95	0.0101	165	181	0	72.27	36	2.4e-06	R	QTAPDATYVYFMDLLAK	T
1	RBR1	NGSrhino	Q Exactive	90	yes	AT3G22310	Symbols: PMH1, ATRH9 | putative mitochondrial RNA helicase 1 | chr3:7887382-7889806 FORWARD LENGTH=610	271	63570	7	7	14.8	610	734	1	1	1	449.293	896.571	2	896.569	0.0014	348	356	0	45.91	26	0.00012	R	ASIIGPLVK	E
1	RBR1	NGSrhino	Q Exactive	90	yes	AT3G22310	Symbols: PMH1, ATRH9 | putative mitochondrial RNA helicase 1 | chr3:7887382-7889806 FORWARD LENGTH=610	271	63570	7	7	14.8	610	2039	1	0	0	536.777	1071.54	2	1071.54	0.0015	145	154	0	43.22	35	0.0016	K	AVLEPAMEGR	D
1	RBR1	NGSrhino	Q Exactive	90	yes	AT3G22310	Symbols: PMH1, ATRH9 | putative mitochondrial RNA helicase 1 | chr3:7887382-7889806 FORWARD LENGTH=610	271	63570	7	7	14.8	610	2799	1	0	0	580.255	1158.5	2	1158.49	0.0022	596	607	0	34.96	31	0.0043	R	SSFGGFGSNDGK	R
1	RBR1	NGSrhino	Q Exactive	90	yes	AT3G22310	Symbols: PMH1, ATRH9 | putative mitochondrial RNA helicase 1 | chr3:7887382-7889806 FORWARD LENGTH=610	271	63570	7	7	14.8	610	3037	1	0	0	594.357	1186.7	2	1186.7	0.0029	167	177	0	51.78	30	8.2e-05	K	TLAFGIPIIDK	I
1	RBR1	NGSrhino	Q Exactive	90	yes	AT3G22310	Symbols: PMH1, ATRH9 | putative mitochondrial RNA helicase 1 | chr3:7887382-7889806 FORWARD LENGTH=610	271	63570	7	7	14.8	610	3808	1	1	1	637.841	1273.67	2	1273.67	0.0004	483	493	0	52.47	37	0.00028	R	FNELPSIAVER	G
1	RBR1	NGSrhino	Q Exactive	90	yes	AT3G22310	Symbols: PMH1, ATRH9 | putative mitochondrial RNA helicase 1 | chr3:7887382-7889806 FORWARD LENGTH=610	271	63570	7	7	14.8	610	7451	1	1	1	898.878	1795.74	2	1795.74	0.001	569	588	0	101.2	29	7.1e-10	R	SSGFGSFGSGGSSGGFGSDR	S
1	RBR1	NGSrhino	Q Exactive	90	yes	AT3G22310	Symbols: PMH1, ATRH9 | putative mitochondrial RNA helicase 1 | chr3:7887382-7889806 FORWARD LENGTH=610	271	63570	7	7	14.8	610	8157	1	1	1	952.979	1903.94	2	1903.95	-0.0102	314	330	0	92.22	36	2.9e-08	K	YLNNPLTIDLVGDSDQK	L
1	RBR1	NGSrhino	Q Exactive	91	yes	AT2G17360	Symbols: | Ribosomal protein S4 (RPS4A) family protein | chr2:7546598-7548138 FORWARD LENGTH=261	267	29784	7	7	31.8	261	1084	1	1	1	472.774	943.534	2	943.534	0.0002	246	253	0	54.69	35	0.00013	K	LTIIEEAR	K
1	RBR1	NGSrhino	Q Exactive	91	yes	AT2G17360	Symbols: | Ribosomal protein S4 (RPS4A) family protein | chr2:7546598-7548138 FORWARD LENGTH=261	267	29784	7	7	31.8	261	1234	1	1	1	482.777	963.54	2	963.539	0.0011	222	230	0	58.89	33	3.1e-05	R	LGNVYTIGK	G
1	RBR1	NGSrhino	Q Exactive	91	yes	AT2G17360	Symbols: | Ribosomal protein S4 (RPS4A) family protein | chr2:7546598-7548138 FORWARD LENGTH=261	267	29784	7	7	31.8	261	2155	1	1	1	544.812	1087.61	2	1087.61	0.0045	60	68	0	56.69	35	6.9e-05	R	EVISILMQR	H
1	RBR1	NGSrhino	Q Exactive	91	yes	AT2G17360	Symbols: | Ribosomal protein S4 (RPS4A) family protein | chr2:7546598-7548138 FORWARD LENGTH=261	267	29784	7	7	31.8	261	3764	1	1	1	634.818	1267.62	2	1267.62	0.0015	135	145	0	63.61	36	2e-05	K	GIPYLNTYDGR	T
1	RBR1	NGSrhino	Q Exactive	91	yes	AT2G17360	Symbols: | Ribosomal protein S4 (RPS4A) family protein | chr2:7546598-7548138 FORWARD LENGTH=261	267	29784	7	7	31.8	261	4381	1	1	1	675.847	1349.68	2	1349.68	0.0033	175	187	0	88.94	37	6.8e-08	K	FDVGNVVMVTGGR	N
1	RBR1	NGSrhino	Q Exactive	91	yes	AT2G17360	Symbols: | Ribosomal protein S4 (RPS4A) family protein | chr2:7546598-7548138 FORWARD LENGTH=261	267	29784	7	7	31.8	261	5857	1	1	1	762.892	1523.77	2	1523.77	-0.0006	81	94	0	53.67	37	0.00024	K	TYPAGFMDVVSIPK	T
1	RBR1	NGSrhino	Q Exactive	91	yes	AT2G17360	Symbols: | Ribosomal protein S4 (RPS4A) family protein | chr2:7546598-7548138 FORWARD LENGTH=261	267	29784	7	7	31.8	261	9599	1	1	1	711.671	2131.99	3	2131.99	-0.0014	203	221	0	60.95	35	2.9e-05	K	GSFETIHIQDSTGHEFATR	L
1	RBR1	NGSrhino	Q Exactive	92	yes	AT3G43300	Symbols: ATMIN7 | HOPM interactor 7 | chr3:15234235-15245034 REVERSE LENGTH=1727	266	191330	7	7	5.5	1727	240	1	1	1	417.249	832.483	2	832.481	0.0024	337	343	0	36.06	33	0.006	R	DALLVFR	T
1	RBR1	NGSrhino	Q Exactive	92	yes	AT3G43300	Symbols: ATMIN7 | HOPM interactor 7 | chr3:15234235-15245034 REVERSE LENGTH=1727	266	191330	7	7	5.5	1727	1925	1	1	1	528.271	1054.53	2	1054.53	-0.0003	1477	1484	0	59.1	34	3.7e-05	R	FMDNLFLR	N
1	RBR1	NGSrhino	Q Exactive	92	yes	AT3G43300	Symbols: ATMIN7 | HOPM interactor 7 | chr3:15234235-15245034 REVERSE LENGTH=1727	266	191330	7	7	5.5	1727	3919	1	1	1	640.901	1279.79	2	1279.79	0.0006	783	795	0	35.14	22	0.0006	R	GGLVSILNLGLPK	R
1	RBR1	NGSrhino	Q Exactive	92	yes	AT3G43300	Symbols: ATMIN7 | HOPM interactor 7 | chr3:15234235-15245034 REVERSE LENGTH=1727	266	191330	7	7	5.5	1727	4996	1	1	1	717.367	1432.72	2	1432.72	0.0037	71	84	0	104.77	37	1.7e-09	K	VTSAEVAQQASQSK	S
1	RBR1	NGSrhino	Q Exactive	92	yes	AT3G43300	Symbols: ATMIN7 | HOPM interactor 7 | chr3:15234235-15245034 REVERSE LENGTH=1727	266	191330	7	7	5.5	1727	5331	1	1	1	737.446	1472.88	2	1472.88	0.0028	430	442	0	32.96	24	0.0013	K	GEIGIFFPIIVLR	S
1	RBR1	NGSrhino	Q Exactive	92	yes	AT3G43300	Symbols: ATMIN7 | HOPM interactor 7 | chr3:15234235-15245034 REVERSE LENGTH=1727	266	191330	7	7	5.5	1727	9303	1	1	1	690.365	2068.07	3	2068.07	0.0029	285	304	0	68.29	34	4.6e-06	K	DTTLASVEELHTLVGGADIK	G
1	RBR1	NGSrhino	Q Exactive	92	yes	AT3G43300	Symbols: ATMIN7 | HOPM interactor 7 | chr3:15234235-15245034 REVERSE LENGTH=1727	266	191330	7	7	5.5	1727	10032	1	1	1	734.73	2201.17	3	2201.18	-0.0098	363	382	0	87.6	33	4e-08	R	ILSLELLQGMLEGVSHSFTK	N
1	RBR1	NGSrhino	Q Exactive	93	yes	AT5G13490	Symbols: AAC2 | ADP/ATP carrier 2 | chr5:4336034-4337379 FORWARD LENGTH=385	265	41720	9	8	21.6	385	199	1	0	0	414.732	827.45	2	827.45	-0.0004	100	107	0	48.03	32	0.00027	K	TAAAPIER	V
1	RBR1	NGSrhino	Q Exactive	93	yes	AT5G13490	Symbols: AAC2 | ADP/ATP carrier 2 | chr5:4336034-4337379 FORWARD LENGTH=385	265	41720	9	8	21.6	385	324	1	0	0	422.735	843.456	2	843.456	-0.0007	150	157	0	61.91	34	1.8e-05	R	GNTANVIR	Y
1	RBR1	NGSrhino	Q Exactive	93	yes	AT5G13490	Symbols: AAC2 | ADP/ATP carrier 2 | chr5:4336034-4337379 FORWARD LENGTH=385	265	41720	9	8	21.6	385	903	1	0	0	459.295	916.576	2	916.575	0.0013	371	378	0	52.81	26	2.3e-05	K	LQLIVFGK	K
1	RBR1	NGSrhino	Q Exactive	93	yes	AT5G13490	Symbols: AAC2 | ADP/ATP carrier 2 | chr5:4336034-4337379 FORWARD LENGTH=385	265	41720	9	8	21.6	385	1128	1	1	1	476.248	950.482	2	950.482	0.0003	246	254	0	55.27	36	0.00014	K	SDGIAGLYR	G
1	RBR1	NGSrhino	Q Exactive	93	yes	AT5G13490	Symbols: AAC2 | ADP/ATP carrier 2 | chr5:4336034-4337379 FORWARD LENGTH=385	265	41720	9	8	21.6	385	1768	1	1	1	516.761	1031.51	2	1031.5	0.0031	141	149	0	60.87	36	3.8e-05	R	DEGIGSLWR	G
1	RBR1	NGSrhino	Q Exactive	93	yes	AT5G13490	Symbols: AAC2 | ADP/ATP carrier 2 | chr5:4336034-4337379 FORWARD LENGTH=385	265	41720	9	8	21.6	385	3005	1	1	1	592.304	1182.59	2	1182.59	0.002	232	241	0	56.4	35	7.3e-05	R	QFNGLVDVYK	K	Deamidated (NQ)	0.0020000000.0
1	RBR1	NGSrhino	Q Exactive	93	yes	AT5G13490	Symbols: AAC2 | ADP/ATP carrier 2 | chr5:4336034-4337379 FORWARD LENGTH=385	265	41720	9	8	21.6	385	4345	1	0	1	672.863	1343.71	2	1343.71	-0.0005	110	120	0	75.54	36	1.3e-06	K	LLIQNQDEMLK	A
1	RBR1	NGSrhino	Q Exactive	93	yes	AT5G13490	Symbols: AAC2 | ADP/ATP carrier 2 | chr5:4336034-4337379 FORWARD LENGTH=385	265	41720	9	8	21.6	385	9190	1	1	1	683.998	2048.97	3	2048.97	0.0023	80	99	0	48.84	36	0.00053	K	GFTNFAIDFMMGGVSAAVSK	T
1	RBR1	NGSrhino	Q Exactive	94	yes	AT3G10270	Symbols: GYRB1 | DNA GYRASE B1 | chr3:3173805-3179756 REVERSE LENGTH=772	265	85796	6	5	8.7	772	2413	1	1	1	556.79	1111.57	2	1111.56	0.0029	442	451	0	49.28	35	0.0004	K	DISLSGEHVR	E
1	RBR1	NGSrhino	Q Exactive	94	yes	AT3G10270	Symbols: GYRB1 | DNA GYRASE B1 | chr3:3173805-3179756 REVERSE LENGTH=772	265	85796	6	5	8.7	772	3561	1	1	1	623.807	1245.6	2	1244.6	0.9947	462	472	0	44.28	36	0.0017	K	VPNPEFEGQTK	T
1	RBR1	NGSrhino	Q Exactive	94	yes	AT3G10270	Symbols: GYRB1 | DNA GYRASE B1 | chr3:3173805-3179756 REVERSE LENGTH=772	265	85796	6	5	8.7	772	5687	1	1	1	504.621	1510.84	3	1510.84	0.0067	182	196	0	58.18	32	2.7e-05	K	SSLETVLTVLHAGGK	F
1	RBR1	NGSrhino	Q Exactive	94	yes	AT3G10270	Symbols: GYRB1 | DNA GYRASE B1 | chr3:3173805-3179756 REVERSE LENGTH=772	265	85796	6	5	8.7	772	6414	1	1	1	541.301	1620.88	3	1620.88	-0.0023	628	642	0	66.78	33	4.9e-06	K	IIILTDADVDGAHIR	T
1	RBR1	NGSrhino	Q Exactive	94	yes	AT3G10270	Symbols: GYRB1 | DNA GYRASE B1 | chr3:3173805-3179756 REVERSE LENGTH=772	265	85796	6	5	8.7	772	6990	1	1	1	855.489	1708.96	2	1708.97	-0.008	599	614	0	103.4	30	4.6e-10	K	NEEIQNLILGLGLGVK	G
1	RBR1	NGSrhino	Q Exactive	95	yes	AT2G33210	Symbols: HSP60-2 | heat shock protein 60-2 | chr2:14075093-14078568 REVERSE LENGTH=585	263	61939	5	5	11.8	585	1006	1	1	0	466.756	931.497	2	931.497	-0.0008	427	435	0	64.3	38	2.4e-05	R	VTDALNATK	A
1	RBR1	NGSrhino	Q Exactive	95	yes	AT2G33210	Symbols: HSP60-2 | heat shock protein 60-2 | chr2:14075093-14078568 REVERSE LENGTH=585	263	61939	5	5	11.8	585	1631	1	1	0	508.767	1015.52	2	1015.52	0.0012	50	59	0	71.47	36	3.1e-06	R	GVEDLADAVK	V
1	RBR1	NGSrhino	Q Exactive	95	yes	AT2G33210	Symbols: HSP60-2 | heat shock protein 60-2 | chr2:14075093-14078568 REVERSE LENGTH=585	263	61939	5	5	11.8	585	3111	1	1	0	598.873	1195.73	2	1195.73	0.0021	469	479	0	27.75	25	0.0058	K	IGVQIIQNALK	T
1	RBR1	NGSrhino	Q Exactive	95	yes	AT2G33210	Symbols: HSP60-2 | heat shock protein 60-2 | chr2:14075093-14078568 REVERSE LENGTH=585	263	61939	5	5	11.8	585	5675	1	1	0	754.888	1507.76	2	1507.76	0.0027	213	225	0	75.82	36	1.2e-06	K	TLFNELEVVEGMK	I
1	RBR1	NGSrhino	Q Exactive	95	yes	AT2G33210	Symbols: HSP60-2 | heat shock protein 60-2 | chr2:14075093-14078568 REVERSE LENGTH=585	263	61939	5	5	11.8	585	11621	1	1	1	873.146	2616.42	3	2616.41	0.0043	534	559	0	138.42	30	1.6e-13	R	TALVDAASVSSLLTTTEAVVTEIPTK	E
1	RBR1	NGSrhino	Q Exactive	96	yes	AT5G14040	Symbols: PHT3;1 | phosphate transporter 3;1 | chr5:4531059-4532965 REVERSE LENGTH=375	259	40064	6	5	16.5	375	1456	1	1	1	497.283	992.552	2	992.548	0.0041	319	327	0	67.36	33	4e-06	K	IGMVGLFTR	G
1	RBR1	NGSrhino	Q Exactive	96	yes	AT5G14040	Symbols: PHT3;1 | phosphate transporter 3;1 | chr5:4531059-4532965 REVERSE LENGTH=375	259	40064	6	5	16.5	375	1540	1	1	1	502.269	1002.52	2	1002.52	-0.0007	203	211	0	45.01	36	0.0016	R	VQTQPGFAR	G
1	RBR1	NGSrhino	Q Exactive	96	yes	AT5G14040	Symbols: PHT3;1 | phosphate transporter 3;1 | chr5:4531059-4532965 REVERSE LENGTH=375	259	40064	6	5	16.5	375	2252	1	1	1	550.758	1099.5	2	1099.5	-0.0004	151	158	0	58.74	33	3.1e-05	K	FGFYEYFK	K
1	RBR1	NGSrhino	Q Exactive	96	yes	AT5G14040	Symbols: PHT3;1 | phosphate transporter 3;1 | chr5:4531059-4532965 REVERSE LENGTH=375	259	40064	6	5	16.5	375	6123	1	1	1	789.397	1576.78	2	1576.78	-0.0051	248	260	0	97.13	37	1e-08	K	FASFETIVEMIYK	Y
1	RBR1	NGSrhino	Q Exactive	96	yes	AT5G14040	Symbols: PHT3;1 | phosphate transporter 3;1 | chr5:4531059-4532965 REVERSE LENGTH=375	259	40064	6	5	16.5	375	9623	1	1	1	1069.6	2137.18	2	2137.18	0.0019	352	374	0	72.01	29	6e-07	K	VFVGLPTTGGVAPAPAIAATEAK	A
1	RBR1	NGSrhino	Q Exactive	97	yes	AT2G16950	Symbols: TRN1, ATTRN1 | transportin 1 | chr2:7353939-7360637 FORWARD LENGTH=895	257	99572	9	9	12.4	895	532	1	1	1	436.235	870.456	2	870.456	0.0001	341	347	1	41.13	33	0.0017	R	DQDLKPR	F
1	RBR1	NGSrhino	Q Exactive	97	yes	AT2G16950	Symbols: TRN1, ATTRN1 | transportin 1 | chr2:7353939-7360637 FORWARD LENGTH=895	257	99572	9	9	12.4	895	1269	1	1	1	485.298	968.582	2	968.581	0.0018	178	185	0	41.29	29	0.00071	R	PINIFLPR	L
1	RBR1	NGSrhino	Q Exactive	97	yes	AT2G16950	Symbols: TRN1, ATTRN1 | transportin 1 | chr2:7353939-7360637 FORWARD LENGTH=895	257	99572	9	9	12.4	895	1281	1	1	1	485.782	969.55	2	969.549	0.0005	746	754	0	46.78	31	0.00028	R	QEVSPIVAK	V
1	RBR1	NGSrhino	Q Exactive	97	yes	AT2G16950	Symbols: TRN1, ATTRN1 | transportin 1 | chr2:7353939-7360637 FORWARD LENGTH=895	257	99572	9	9	12.4	895	2476	1	1	1	559.822	1117.63	2	1117.63	0.0014	698	706	0	40.26	33	0.0023	R	VFPVYLQPR	L
1	RBR1	NGSrhino	Q Exactive	97	yes	AT2G16950	Symbols: TRN1, ATTRN1 | transportin 1 | chr2:7353939-7360637 FORWARD LENGTH=895	257	99572	9	9	12.4	895	2708	1	1	1	574.802	1147.59	2	1147.59	0.0026	468	477	0	68.94	37	7.3e-06	K	YLIQESGNPK	G
1	RBR1	NGSrhino	Q Exactive	97	yes	AT2G16950	Symbols: TRN1, ATTRN1 | transportin 1 | chr2:7353939-7360637 FORWARD LENGTH=895	257	99572	9	9	12.4	895	5571	1	1	1	746.907	1491.8	2	1491.79	0.0066	544	557	0	63.51	35	1.5e-05	R	IVYDAIGTLADSVR	E
1	RBR1	NGSrhino	Q Exactive	97	yes	AT2G16950	Symbols: TRN1, ATTRN1 | transportin 1 | chr2:7353939-7360637 FORWARD LENGTH=895	257	99572	9	9	12.4	895	7216	1	1	1	584.002	1748.98	3	1748.98	0.0063	755	771	0	45.58	29	0.00023	K	VVSSLGLILQHGEGVNK	A
1	RBR1	NGSrhino	Q Exactive	97	yes	AT2G16950	Symbols: TRN1, ATTRN1 | transportin 1 | chr2:7353939-7360637 FORWARD LENGTH=895	257	99572	9	9	12.4	895	9174	1	1	1	682.373	2044.1	3	2044.1	0.001	707	724	0	81.11	32	1.5e-07	R	LLDFLEIASQQLSANLNR	E
1	RBR1	NGSrhino	Q Exactive	97	yes	AT2G16950	Symbols: TRN1, ATTRN1 | transportin 1 | chr2:7353939-7360637 FORWARD LENGTH=895	257	99572	9	9	12.4	895	9863	1	1	1	723.408	2167.2	3	2167.2	0.007	558	576	1	31.11	29	0.0065	R	EELNKPAYLEILMPPLVAK	W
1	RBR1	NGSrhino	Q Exactive	98	no	AT3G48750	Symbols: CDKA;1, CDC2AAT, CDK2, CDC2, CDC2A, CDKA1 | cell division control 2 | chr3:18072238-18074296 FORWARD LENGTH=294	256	34009	7	7	29.3	294	1351	1	1	1	490.259	978.503	2	978.502	0.0008	230	238	0	42.32	36	0.0025	R	GVTSLPDYK	S
1	RBR1	NGSrhino	Q Exactive	98	no	AT3G48750	Symbols: CDKA;1, CDC2AAT, CDK2, CDC2, CDC2A, CDKA1 | cell division control 2 | chr3:18072238-18074296 FORWARD LENGTH=294	256	34009	7	7	29.3	294	1919	1	1	1	527.78	1053.54	2	1053.55	-0.0007	66	74	0	58.63	35	4.5e-05	K	LQDVVHSEK	R
1	RBR1	NGSrhino	Q Exactive	98	no	AT3G48750	Symbols: CDKA;1, CDC2AAT, CDK2, CDC2, CDC2A, CDKA1 | cell division control 2 | chr3:18072238-18074296 FORWARD LENGTH=294	256	34009	7	7	29.3	294	2379	1	1	1	554.278	1106.54	2	1106.54	0.0022	280	288	0	58.26	36	7.4e-05	R	AALEHEYFK	D
1	RBR1	NGSrhino	Q Exactive	98	no	AT3G48750	Symbols: CDKA;1, CDC2AAT, CDK2, CDC2, CDC2A, CDKA1 | cell division control 2 | chr3:18072238-18074296 FORWARD LENGTH=294	256	34009	7	7	29.3	294	3018	1	1	1	593.312	1184.61	2	1184.61	0.0013	10	20	0	59.78	34	3.3e-05	K	IGEGTYGVVYK	A
1	RBR1	NGSrhino	Q Exactive	98	no	AT3G48750	Symbols: CDKA;1, CDC2AAT, CDK2, CDC2, CDC2A, CDKA1 | cell division control 2 | chr3:18072238-18074296 FORWARD LENGTH=294	256	34009	7	7	29.3	294	4486	1	1	1	684.815	1367.62	2	1367.62	-0.0023	219	229	0	56.07	35	8.6e-05	R	IMGTPYEDTWR	G
1	RBR1	NGSrhino	Q Exactive	98	no	AT3G48750	Symbols: CDKA;1, CDC2AAT, CDK2, CDC2, CDC2A, CDKA1 | cell division control 2 | chr3:18072238-18074296 FORWARD LENGTH=294	256	34009	7	7	29.3	294	5950	1	1	1	772.383	1542.75	2	1542.75	-0.0008	37	50	0	84.5	36	1.5e-07	R	LEQEDEGVPSTAIR	E
1	RBR1	NGSrhino	Q Exactive	98	no	AT3G48750	Symbols: CDKA;1, CDC2AAT, CDK2, CDC2, CDC2A, CDKA1 | cell division control 2 | chr3:18072238-18074296 FORWARD LENGTH=294	256	34009	7	7	29.3	294	11577	1	1	1	867.119	2598.34	3	2598.32	0.0137	244	266	1	61.48	34	1.9e-05	K	WKPTDLETFVPNLDPDGVDLLSK	M
1	RBR1	NGSrhino	Q Exactive	99	yes	AT5G19990	Symbols: RPT6A, ATSUG1 | regulatory particle triple-A ATPase 6A | chr5:6752144-6754918 FORWARD LENGTH=419	256	47218	6	5	17.4	419	1727	1	1	1	514.795	1027.58	2	1027.57	0.0016	143	151	0	43.45	33	0.0011	K	VDPLVNLMK	V
1	RBR1	NGSrhino	Q Exactive	99	yes	AT5G19990	Symbols: RPT6A, ATSUG1 | regulatory particle triple-A ATPase 6A | chr5:6752144-6754918 FORWARD LENGTH=419	256	47218	6	5	17.4	419	2797	1	0	0	579.831	1157.65	2	1157.64	0.0035	197	208	0	39.98	35	0.0035	K	GVLLYGPPGTGK	T
1	RBR1	NGSrhino	Q Exactive	99	yes	AT5G19990	Symbols: RPT6A, ATSUG1 | regulatory particle triple-A ATPase 6A | chr5:6752144-6754918 FORWARD LENGTH=419	256	47218	6	5	17.4	419	8043	1	1	1	940.458	1878.9	2	1878.9	-0.0014	155	171	0	97.46	37	9e-09	K	VPDSTYDMIGGLDQQIK	E
1	RBR1	NGSrhino	Q Exactive	99	yes	AT5G19990	Symbols: RPT6A, ATSUG1 | regulatory particle triple-A ATPase 6A | chr5:6752144-6754918 FORWARD LENGTH=419	256	47218	6	5	17.4	419	8259	1	1	1	641.656	1921.95	3	1921.95	0.0008	285	301	0	90.18	37	5.1e-08	R	TMLELLNQLDGFEASNK	I
1	RBR1	NGSrhino	Q Exactive	99	yes	AT5G19990	Symbols: RPT6A, ATSUG1 | regulatory particle triple-A ATPase 6A | chr5:6752144-6754918 FORWARD LENGTH=419	256	47218	6	5	17.4	419	8943	1	1	1	1009.03	2016.04	2	2016.04	-0.0019	73	90	0	50.86	35	0.00032	R	EELQLLQEPGSYVGEVVK	V
1	RBR1	NGSrhino	Q Exactive	100	yes	AT5G08610	Symbols: | P-loop containing nucleoside triphosphate hydrolases superfamily protein | chr5:2790341-2794059 FORWARD LENGTH=850	255	94128	6	5	9.2	850	4362	1	1	1	674.318	1346.62	2	1346.62	0.0001	523	534	0	35.43	35	0.0097	K	DHIENTSGFATR	L
1	RBR1	NGSrhino	Q Exactive	100	yes	AT5G08610	Symbols: | P-loop containing nucleoside triphosphate hydrolases superfamily protein | chr5:2790341-2794059 FORWARD LENGTH=850	255	94128	6	5	9.2	850	4828	1	1	1	705.372	1408.73	2	1408.73	-0.0013	361	373	1	68.33	35	5.6e-06	K	AVQTDKPTGEHVK	T
1	RBR1	NGSrhino	Q Exactive	100	yes	AT5G08610	Symbols: | P-loop containing nucleoside triphosphate hydrolases superfamily protein | chr5:2790341-2794059 FORWARD LENGTH=850	255	94128	6	5	9.2	850	7811	1	1	1	614.986	1841.94	3	1841.93	0.0027	540	555	0	87.26	35	6.7e-08	K	VLVLDEADHLLDMGFR	R
1	RBR1	NGSrhino	Q Exactive	100	yes	AT5G08610	Symbols: | P-loop containing nucleoside triphosphate hydrolases superfamily protein | chr5:2790341-2794059 FORWARD LENGTH=850	255	94128	6	5	9.2	850	8714	1	1	1	988.975	1975.93	2	1975.94	-0.0025	84	100	0	103.89	36	1.8e-09	K	SLIEDEAELSDWVSDLR	T
1	RBR1	NGSrhino	Q Exactive	100	yes	AT5G08610	Symbols: | P-loop containing nucleoside triphosphate hydrolases superfamily protein | chr5:2790341-2794059 FORWARD LENGTH=850	255	94128	6	5	9.2	850	10375	1	1	1	762.045	2283.11	3	2283.11	0.001	737	756	0	43.6	36	0.0018	K	EGEGVLLLAPWEEYFMSSVK	D
1	RBR1	NGSrhino	Q Exactive	101	yes	AT1G36160	Symbols: ACC1, AT-ACC1, EMB22, GK, PAS3 | acetyl-CoA carboxylase 1 | chr1:13534196-13543773 FORWARD LENGTH=2254	253	251223	6	6	4.3	2254	1022	1	0	0	468.253	934.492	2	934.491	0.0005	1864	1871	0	40.98	37	0.0042	K	WLGGIFDK	N
1	RBR1	NGSrhino	Q Exactive	101	yes	AT1G36160	Symbols: ACC1, AT-ACC1, EMB22, GK, PAS3 | acetyl-CoA carboxylase 1 | chr1:13534196-13543773 FORWARD LENGTH=2254	253	251223	6	6	4.3	2254	2693	1	0	0	573.795	1145.57	2	1145.58	-0.0003	636	646	0	59.4	36	5.5e-05	R	DGGLLMQLDGK	S
1	RBR1	NGSrhino	Q Exactive	101	yes	AT1G36160	Symbols: ACC1, AT-ACC1, EMB22, GK, PAS3 | acetyl-CoA carboxylase 1 | chr1:13534196-13543773 FORWARD LENGTH=2254	253	251223	6	6	4.3	2254	3945	1	1	1	643.313	1284.61	2	1284.61	0.0019	1276	1286	0	57.86	35	5.4e-05	K	GYSNIQYTPSR	D
1	RBR1	NGSrhino	Q Exactive	101	yes	AT1G36160	Symbols: ACC1, AT-ACC1, EMB22, GK, PAS3 | acetyl-CoA carboxylase 1 | chr1:13534196-13543773 FORWARD LENGTH=2254	253	251223	6	6	4.3	2254	8130	1	0	0	632.645	1894.91	3	1894.91	0.0065	514	529	0	85.08	37	1.6e-07	R	TNVDYTIDLLHASDYR	D
1	RBR1	NGSrhino	Q Exactive	101	yes	AT1G36160	Symbols: ACC1, AT-ACC1, EMB22, GK, PAS3 | acetyl-CoA carboxylase 1 | chr1:13534196-13543773 FORWARD LENGTH=2254	253	251223	6	6	4.3	2254	10711	1	0	0	778.757	2333.25	3	2333.24	0.0109	163	185	0	73.34	31	7e-07	K	IGSSLIAQAADVPTLPWSGSHVK	I
1	RBR1	NGSrhino	Q Exactive	101	yes	AT1G36160	Symbols: ACC1, AT-ACC1, EMB22, GK, PAS3 | acetyl-CoA carboxylase 1 | chr1:13534196-13543773 FORWARD LENGTH=2254	253	251223	6	6	4.3	2254	12302	1	0	0	949.856	2846.55	3	2846.55	-0.0026	2210	2236	0	67.05	29	1.7e-06	K	LLNQLAEIGNSSDLQALPQGLANLLNK	V
1	RBR1	NGSrhino	Q Exactive	102	no	AT4G29000	Symbols: | Tesmin/TSO1-like CXC domain-containing protein | chr4:14293957-14296602 FORWARD LENGTH=603	251	64595	6	5	10.8	603	625	1	1	1	441.233	880.451	2	880.452	-0.0001	192	200	0	55.35	35	0.00012	K	IASSPHGGR	D
1	RBR1	NGSrhino	Q Exactive	102	no	AT4G29000	Symbols: | Tesmin/TSO1-like CXC domain-containing protein | chr4:14293957-14296602 FORWARD LENGTH=603	251	64595	6	5	10.8	603	3668	1	1	1	630.853	1259.69	2	1259.69	0.0046	301	311	0	38.17	35	0.006	K	GQEILFNQAIK	D
1	RBR1	NGSrhino	Q Exactive	102	no	AT4G29000	Symbols: | Tesmin/TSO1-like CXC domain-containing protein | chr4:14293957-14296602 FORWARD LENGTH=603	251	64595	6	5	10.8	603	4640	1	1	1	694.343	1386.67	2	1386.67	-0.0023	327	341	0	102.57	35	2.2e-09	R	TGGPTSGTSPSPVSR	A
1	RBR1	NGSrhino	Q Exactive	102	no	AT4G29000	Symbols: | Tesmin/TSO1-like CXC domain-containing protein | chr4:14293957-14296602 FORWARD LENGTH=603	251	64595	6	5	10.8	603	5373	1	1	1	492.945	1475.81	3	1475.81	0.0043	357	369	0	61.76	33	1.4e-05	R	SLLADIIQPHDVR	A
1	RBR1	NGSrhino	Q Exactive	102	no	AT4G29000	Symbols: | Tesmin/TSO1-like CXC domain-containing protein | chr4:14293957-14296602 FORWARD LENGTH=603	251	64595	6	5	10.8	603	7607	1	1	1	906.959	1811.9	2	1811.9	0.0026	543	559	0	91.99	36	2.7e-08	K	TENGIQQQVPIVNGASR	T	2 Deamidated (NQ)	0.00200000000020000.0
1	RBR1	NGSrhino	Q Exactive	103	yes	AT3G11940	Symbols: ATRPS5A, AML1, RPS5A | ribosomal protein 5A | chr3:3778175-3779354 REVERSE LENGTH=207	251	22907	4	3	19.8	207	1507	1	1	0	499.786	997.558	2	997.556	0.0019	140	148	0	57.66	32	3e-05	R	QAVDISPLR	R
1	RBR1	NGSrhino	Q Exactive	103	yes	AT3G11940	Symbols: ATRPS5A, AML1, RPS5A | ribosomal protein 5A | chr3:3778175-3779354 REVERSE LENGTH=207	251	22907	4	3	19.8	207	4780	1	1	1	702.403	1402.79	2	1402.79	-0.0024	150	162	0	52.86	32	0.0001	R	VNQAIFLITTGAR	E
1	RBR1	NGSrhino	Q Exactive	103	yes	AT3G11940	Symbols: ATRPS5A, AML1, RPS5A | ribosomal protein 5A | chr3:3778175-3779354 REVERSE LENGTH=207	251	22907	4	3	19.8	207	8980	1	1	1	1015.01	2028	2	2028	0.0001	2	20	0	133.77	36	1.9e-12	M	ATAADVDAEIQQALTNEVK	L	Acetyl (Protein N-term)	1.0000000000000000000.0
1	RBR1	NGSrhino	Q Exactive	104	yes	AT3G13160	Symbols: | Tetratricopeptide repeat (TPR)-like superfamily protein | chr3:4229994-4231178 REVERSE LENGTH=394	249	44899	4	2	8.4	394	7128	1	1	1	868.447	1734.88	2	1734.87	0.0117	191	206	0	107.35	36	8.9e-10	K	GSFTEAVALIDEIENK	G
1	RBR1	NGSrhino	Q Exactive	104	yes	AT3G13160	Symbols: | Tetratricopeptide repeat (TPR)-like superfamily protein | chr3:4229994-4231178 REVERSE LENGTH=394	249	44899	4	2	8.4	394	7864	1	1	1	927.031	1852.05	2	1852.06	-0.0079	348	364	0	82.1	28	4.7e-08	R	LLVDEAVLQEVVDALVK	G
1	RBR1	NGSrhino	Q Exactive	105	yes	AT3G17390	Symbols: MTO3, SAMS3, MAT4 | S-adenosylmethionine synthetase family protein | chr3:5952484-5953665 REVERSE LENGTH=393	249	42769	7	5	16.3	393	317	1	1	1	422.263	842.511	2	842.511	-0.0002	332	338	0	52.28	33	0.00013	K	EILEIVK	E
1	RBR1	NGSrhino	Q Exactive	105	yes	AT3G17390	Symbols: MTO3, SAMS3, MAT4 | S-adenosylmethionine synthetase family protein | chr3:5952484-5953665 REVERSE LENGTH=393	249	42769	7	5	16.3	393	558	1	1	1	437.261	872.508	2	872.508	0	292	300	0	47.72	36	0.00072	K	SIVASGLAR	R
1	RBR1	NGSrhino	Q Exactive	105	yes	AT3G17390	Symbols: MTO3, SAMS3, MAT4 | S-adenosylmethionine synthetase family protein | chr3:5952484-5953665 REVERSE LENGTH=393	249	42769	7	5	16.3	393	3219	1	1	1	603.811	1205.61	2	1205.6	0.004	61	70	0	55.88	38	0.00017	K	ANVDYEQIVR	K
1	RBR1	NGSrhino	Q Exactive	105	yes	AT3G17390	Symbols: MTO3, SAMS3, MAT4 | S-adenosylmethionine synthetase family protein | chr3:5952484-5953665 REVERSE LENGTH=393	249	42769	7	5	16.3	393	6759	1	1	1	831.921	1661.83	2	1661.83	-0.0035	374	387	1	85.92	36	1.2e-07	R	DDADFTWEVVKPLK	S
1	RBR1	NGSrhino	Q Exactive	105	yes	AT3G17390	Symbols: MTO3, SAMS3, MAT4 | S-adenosylmethionine synthetase family protein | chr3:5952484-5953665 REVERSE LENGTH=393	249	42769	7	5	16.3	393	11657	1	1	1	883.786	2648.34	3	2648.33	0.0078	188	211	0	90.27	35	3.2e-08	R	VHTVLISTQHDETVTNDEIAADLK	E
1	RBR1	NGSrhino	Q Exactive	106	yes	AT3G09810	Symbols: IDH-VI | isocitrate dehydrogenase VI | chr3:3008753-3011070 FORWARD LENGTH=374	249	40550	8	7	23.5	374	122	1	0	0	408.752	815.489	2	815.486	0.0022	121	127	0	41.72	36	0.0027	R	SLNLTLR	K
1	RBR1	NGSrhino	Q Exactive	106	yes	AT3G09810	Symbols: IDH-VI | isocitrate dehydrogenase VI | chr3:3008753-3011070 FORWARD LENGTH=374	249	40550	8	7	23.5	374	2359	1	1	1	552.768	1103.52	2	1103.52	0.0037	234	241	0	39.99	35	0.0035	K	YPEIYYEK	V
1	RBR1	NGSrhino	Q Exactive	106	yes	AT3G09810	Symbols: IDH-VI | isocitrate dehydrogenase VI | chr3:3008753-3011070 FORWARD LENGTH=374	249	40550	8	7	23.5	374	3334	1	0	0	611.819	1221.62	2	1221.62	-0.0006	149	158	0	58.57	36	6.6e-05	R	YDDVDLITIR	E
1	RBR1	NGSrhino	Q Exactive	106	yes	AT3G09810	Symbols: IDH-VI | isocitrate dehydrogenase VI | chr3:3008753-3011070 FORWARD LENGTH=374	249	40550	8	7	23.5	374	5618	1	1	1	751.356	1500.7	2	1500.69	0.0022	354	368	0	65.34	35	1.1e-05	R	TADLGGSSTTTDFTK	A
1	RBR1	NGSrhino	Q Exactive	106	yes	AT3G09810	Symbols: IDH-VI | isocitrate dehydrogenase VI | chr3:3008753-3011070 FORWARD LENGTH=374	249	40550	8	7	23.5	374	7290	1	1	1	883.461	1764.91	2	1764.9	0.0022	88	102	0	84.6	36	1.5e-07	R	TNSFLTWDNLQSVLK	N
1	RBR1	NGSrhino	Q Exactive	106	yes	AT3G09810	Symbols: IDH-VI | isocitrate dehydrogenase VI | chr3:3008753-3011070 FORWARD LENGTH=374	249	40550	8	7	23.5	374	7686	1	1	1	606.956	1817.85	3	1817.84	0.0023	159	174	0	51.44	35	0.00028	R	ENTEGEYSGLEHQVVK	G
1	RBR1	NGSrhino	Q Exactive	106	yes	AT3G09810	Symbols: IDH-VI | isocitrate dehydrogenase VI | chr3:3008753-3011070 FORWARD LENGTH=374	249	40550	8	7	23.5	374	7710	1	1	1	608.328	1821.96	3	1821.96	0.0031	335	351	0	51.94	34	0.00017	K	QAEQIHSAIINTIAEGK	Y
1	RBR1	NGSrhino	Q Exactive	107	yes	AT5G20290	Symbols: | Ribosomal protein S8e family protein | chr5:6851695-6853012 REVERSE LENGTH=222	246	24978	5	5	25.7	222	1184	1	1	1	480.23	958.446	2	958.447	-0.0012	205	211	0	35.25	33	0.0063	K	ELEFYMK	K
1	RBR1	NGSrhino	Q Exactive	107	yes	AT5G20290	Symbols: | Ribosomal protein S8e family protein | chr5:6851695-6853012 REVERSE LENGTH=222	246	24978	5	5	25.7	222	1239	1	1	1	483.25	964.486	2	964.486	0	196	204	0	40.91	36	0.0035	R	ADGYILEGK	E
1	RBR1	NGSrhino	Q Exactive	107	yes	AT5G20290	Symbols: | Ribosomal protein S8e family protein | chr5:6851695-6853012 REVERSE LENGTH=222	246	24978	5	5	25.7	222	3554	1	1	1	623.346	1244.68	2	1244.68	0.0015	100	111	0	69.39	35	4.1e-06	K	SAIVQVDAAPFK	Q
1	RBR1	NGSrhino	Q Exactive	107	yes	AT5G20290	Symbols: | Ribosomal protein S8e family protein | chr5:6851695-6853012 REVERSE LENGTH=222	246	24978	5	5	25.7	222	6035	1	1	1	781.365	1560.71	2	1560.72	-0.0021	168	181	0	61.69	35	2.2e-05	R	SLDSHIEDQFASGR	L
1	RBR1	NGSrhino	Q Exactive	107	yes	AT5G20290	Symbols: | Ribosomal protein S8e family protein | chr5:6851695-6853012 REVERSE LENGTH=222	246	24978	5	5	25.7	222	6730	1	1	1	829.375	1656.73	2	1656.74	-0.003	61	75	0	136.28	34	6.3e-13	R	LDTGNYSWGSEATTR	K
1	RBR1	NGSrhino	Q Exactive	108	yes	AT3G56130	Symbols: | biotin/lipoyl attachment domain-containing protein | chr3:20826852-20829007 FORWARD LENGTH=281	245	29558	5	5	33.8	281	1899	1	1	1	526.758	1051.5	2	1051.5	-0.0004	112	120	0	65.15	36	1.3e-05	K	VGDFEMNLK	R
1	RBR1	NGSrhino	Q Exactive	108	yes	AT3G56130	Symbols: | biotin/lipoyl attachment domain-containing protein | chr3:20826852-20829007 FORWARD LENGTH=281	245	29558	5	5	33.8	281	2457	1	1	1	559.278	1116.54	2	1116.54	0.0003	151	162	0	50.65	35	0.00032	K	SASSAPSPSQAK	P
1	RBR1	NGSrhino	Q Exactive	108	yes	AT3G56130	Symbols: | biotin/lipoyl attachment domain-containing protein | chr3:20826852-20829007 FORWARD LENGTH=281	245	29558	5	5	33.8	281	7550	1	1	1	901.4	1800.79	2	1800.79	-0.001	62	80	0	124.92	33	7.2e-12	K	SSTTTISDGSSDASVSDGK	K
1	RBR1	NGSrhino	Q Exactive	108	yes	AT3G56130	Symbols: | biotin/lipoyl attachment domain-containing protein | chr3:20826852-20829007 FORWARD LENGTH=281	245	29558	5	5	33.8	281	12319	1	1	1	951.505	2851.49	3	2851.5	-0.0052	227	253	0	71.42	32	1.3e-06	K	EGQVIGYLHQLGTELPVTSDVAGEVLK	L
1	RBR1	NGSrhino	Q Exactive	108	yes	AT3G56130	Symbols: | biotin/lipoyl attachment domain-containing protein | chr3:20826852-20829007 FORWARD LENGTH=281	245	29558	5	5	33.8	281	12611	1	1	1	1478.74	2955.46	2	2955.45	0.0092	254	281	0	36.29	35	0.0085	K	LLSDDGDSVGYGDPLVAVLPSFHDINIQ	-
1	RBR1	NGSrhino	Q Exactive	109	yes	AT1G13440	Symbols: GAPC-2, GAPC2 | glyceraldehyde-3-phosphate dehydrogenase C2 | chr1:4608465-4610494 REVERSE LENGTH=338	240	36890	6	5	19.5	338	247	1	1	1	417.728	833.441	2	833.439	0.0012	8	15	0	45.11	37	0.0017	R	IGINGFGR	I	Deamidated (NQ)	0.00020000.0
1	RBR1	NGSrhino	Q Exactive	109	yes	AT1G13440	Symbols: GAPC-2, GAPC2 | glyceraldehyde-3-phosphate dehydrogenase C2 | chr1:4608465-4610494 REVERSE LENGTH=338	240	36890	6	5	19.5	338	2654	1	1	1	570.827	1139.64	2	1139.64	0.0016	328	337	0	48.46	31	0.00022	R	VVDLIVHMSK	A
1	RBR1	NGSrhino	Q Exactive	109	yes	AT1G13440	Symbols: GAPC-2, GAPC2 | glyceraldehyde-3-phosphate dehydrogenase C2 | chr1:4608465-4610494 REVERSE LENGTH=338	240	36890	6	5	19.5	338	5613	1	1	1	749.928	1497.84	2	1497.84	0.0017	239	252	0	89.75	31	1.4e-08	R	VPTVDVSVVDLTVR	L
1	RBR1	NGSrhino	Q Exactive	109	yes	AT1G13440	Symbols: GAPC-2, GAPC2 | glyceraldehyde-3-phosphate dehydrogenase C2 | chr1:4608465-4610494 REVERSE LENGTH=338	240	36890	6	5	19.5	338	7120	1	1	1	867.91	1733.8	2	1733.81	-0.0034	131	145	0	56.94	36	8.5e-05	K	DAPMFVVGVNEHEYK	S
1	RBR1	NGSrhino	Q Exactive	109	yes	AT1G13440	Symbols: GAPC-2, GAPC2 | glyceraldehyde-3-phosphate dehydrogenase C2 | chr1:4608465-4610494 REVERSE LENGTH=338	240	36890	6	5	19.5	338	8999	1	1	1	678.364	2032.07	3	2032.07	0.0051	172	190	0	81.48	34	1.9e-07	R	FGIVEGLMTTVHSITATQK	T
1	RBR1	NGSrhino	Q Exactive	110	yes	AT1G56110	Symbols: NOP56 | homolog of nucleolar protein NOP56 | chr1:20984544-20986893 REVERSE LENGTH=522	239	58636	4	3	11.5	522	475	1	1	1	432.726	863.436	2	863.435	0.0015	33	40	0	51.78	36	0.00033	R	TSVSDLSR	F
1	RBR1	NGSrhino	Q Exactive	110	yes	AT1G56110	Symbols: NOP56 | homolog of nucleolar protein NOP56 | chr1:20984544-20986893 REVERSE LENGTH=522	239	58636	4	3	11.5	522	8295	1	1	1	643.67	1927.99	3	1927.99	0.0035	292	310	0	77.41	35	6.6e-07	K	MSDIAPNLAALIGEMVGAR	L
1	RBR1	NGSrhino	Q Exactive	110	yes	AT1G56110	Symbols: NOP56 | homolog of nucleolar protein NOP56 | chr1:20984544-20986893 REVERSE LENGTH=522	239	58636	4	3	11.5	522	13448	1	1	1	1201.6	3601.79	3	3600.78	1.0144	44	76	0	128.28	33	3.4e-12	R	VVQLTAFHPFESALDALNQVNAVSEGVMTDELR	S	Deamidated (NQ)	0.000000000000000000200000000000000.0
1	RBR1	NGSrhino	Q Exactive	111	yes	AT1G25490	Symbols: RCN1, REGA, ATB BETA BETA, EER1 | ARM repeat superfamily protein | chr1:8951700-8954899 FORWARD LENGTH=588	239	65452	5	5	13.3	588	553	1	1	0	437.225	872.435	2	872.435	-0.0005	20	26	0	37.3	34	0.0052	K	NDDIQLR	L
1	RBR1	NGSrhino	Q Exactive	111	yes	AT1G25490	Symbols: RCN1, REGA, ATB BETA BETA, EER1 | ARM repeat superfamily protein | chr1:8951700-8954899 FORWARD LENGTH=588	239	65452	5	5	13.3	588	3546	1	1	0	622.795	1243.58	2	1243.58	-0.0033	326	336	0	71.72	34	1.9e-06	K	ELSSDSSQHVR	S
1	RBR1	NGSrhino	Q Exactive	111	yes	AT1G25490	Symbols: RCN1, REGA, ATB BETA BETA, EER1 | ARM repeat superfamily protein | chr1:8951700-8954899 FORWARD LENGTH=588	239	65452	5	5	13.3	588	6026	1	1	1	779.935	1557.86	2	1557.86	-0.0065	337	352	0	89.45	33	2.7e-08	R	SALASVIMGMAPILGK	D
1	RBR1	NGSrhino	Q Exactive	111	yes	AT1G25490	Symbols: RCN1, REGA, ATB BETA BETA, EER1 | ARM repeat superfamily protein | chr1:8951700-8954899 FORWARD LENGTH=588	239	65452	5	5	13.3	588	7798	1	1	1	613.691	1838.05	3	1838.06	-0.0032	353	368	0	47.66	28	0.00011	K	DSTIEHLLPIFLSLLK	D
1	RBR1	NGSrhino	Q Exactive	111	yes	AT1G25490	Symbols: RCN1, REGA, ATB BETA BETA, EER1 | ARM repeat superfamily protein | chr1:8951700-8954899 FORWARD LENGTH=588	239	65452	5	5	13.3	588	12804	1	1	0	1021.23	3060.67	3	3060.67	-0.0016	382	409	0	102.91	29	4.1e-10	K	LDQVNQVIGIDLLSQSLLPAIVELAEDR	H
1	RBR1	NGSrhino	Q Exactive	112	yes	AT4G24820	Symbols: | 26S proteasome, regulatory subunit Rpn7;Proteasome component (PCI) domain | chr4:12790471-12792599 REVERSE LENGTH=387	238	44254	6	6	19.1	387	1342	1	1	1	489.767	977.518	2	977.518	0.0002	37	44	0	54.34	35	0.00013	K	SEVLDFIR	S
1	RBR1	NGSrhino	Q Exactive	112	yes	AT4G24820	Symbols: | 26S proteasome, regulatory subunit Rpn7;Proteasome component (PCI) domain | chr4:12790471-12792599 REVERSE LENGTH=387	238	44254	6	6	19.1	387	3455	1	1	1	619.277	1236.54	2	1236.54	-0.0013	165	174	0	44.79	34	0.00086	K	LFEEGGDWER	K
1	RBR1	NGSrhino	Q Exactive	112	yes	AT4G24820	Symbols: | 26S proteasome, regulatory subunit Rpn7;Proteasome component (PCI) domain | chr4:12790471-12792599 REVERSE LENGTH=387	238	44254	6	6	19.1	387	4500	1	1	1	685.375	1368.73	2	1368.74	-0.0016	348	360	1	46.28	34	0.00063	K	VAGVLETNRPDAK	N
1	RBR1	NGSrhino	Q Exactive	112	yes	AT4G24820	Symbols: | 26S proteasome, regulatory subunit Rpn7;Proteasome component (PCI) domain | chr4:12790471-12792599 REVERSE LENGTH=387	238	44254	6	6	19.1	387	5897	1	1	1	766.366	1530.72	2	1530.72	0.0013	86	99	0	113.92	35	1.6e-10	K	IADAEENLGESEVR	E
1	RBR1	NGSrhino	Q Exactive	112	yes	AT4G24820	Symbols: | 26S proteasome, regulatory subunit Rpn7;Proteasome component (PCI) domain | chr4:12790471-12792599 REVERSE LENGTH=387	238	44254	6	6	19.1	387	6473	1	1	1	546.304	1635.89	3	1635.89	0.004	19	32	0	46.9	32	0.00035	K	LFLLTHPDVPDIEK	V
1	RBR1	NGSrhino	Q Exactive	112	yes	AT4G24820	Symbols: | 26S proteasome, regulatory subunit Rpn7;Proteasome component (PCI) domain | chr4:12790471-12792599 REVERSE LENGTH=387	238	44254	6	6	19.1	387	6845	1	1	1	841.924	1681.83	2	1681.83	0.0014	320	334	0	70.96	36	3.6e-06	K	AFGVSVDFIDQELSR	F
1	RBR1	NGSrhino	Q Exactive	113	yes	AT3G56150	Symbols: EIF3C, ATEIF3C-1, EIF3C-1, ATTIF3C1, TIF3C1 | eukaryotic translation initiation factor 3C | chr3:20833790-20836820 REVERSE LENGTH=900	233	102884	5	5	7.8	900	3035	1	1	1	594.324	1186.63	2	1186.63	0.002	575	585	0	49.39	35	0.00043	R	ELLAQGVSQSR	Y
1	RBR1	NGSrhino	Q Exactive	113	yes	AT3G56150	Symbols: EIF3C, ATEIF3C-1, EIF3C-1, ATTIF3C1, TIF3C1 | eukaryotic translation initiation factor 3C | chr3:20833790-20836820 REVERSE LENGTH=900	233	102884	5	5	7.8	900	4081	1	1	1	652.364	1302.71	2	1302.71	0.0052	352	362	0	58.37	35	5e-05	R	VWGNLVAFLER	V
1	RBR1	NGSrhino	Q Exactive	113	yes	AT3G56150	Symbols: EIF3C, ATEIF3C-1, EIF3C-1, ATTIF3C1, TIF3C1 | eukaryotic translation initiation factor 3C | chr3:20833790-20836820 REVERSE LENGTH=900	233	102884	5	5	7.8	900	5099	1	1	1	481.934	1442.78	3	1442.78	0.0033	261	272	0	52.63	35	0.00017	R	FELVDQLTHLTK	I
1	RBR1	NGSrhino	Q Exactive	113	yes	AT3G56150	Symbols: EIF3C, ATEIF3C-1, EIF3C-1, ATTIF3C1, TIF3C1 | eukaryotic translation initiation factor 3C | chr3:20833790-20836820 REVERSE LENGTH=900	233	102884	5	5	7.8	900	7694	1	1	1	607.654	1819.94	3	1819.94	0.0019	112	127	0	82	35	2.2e-07	K	TLVMLEDFLNEALANK	E
1	RBR1	NGSrhino	Q Exactive	113	yes	AT3G56150	Symbols: EIF3C, ATEIF3C-1, EIF3C-1, ATTIF3C1, TIF3C1 | eukaryotic translation initiation factor 3C | chr3:20833790-20836820 REVERSE LENGTH=900	233	102884	5	5	7.8	900	11103	1	1	1	823.745	2468.21	3	2468.22	-0.0027	385	404	1	91.84	35	2.5e-08	R	LRDEPMFLALAQNIQDYFER	M
1	RBR1	NGSrhino	Q Exactive	114	yes	AT2G20800	Symbols: NDB4 | NAD(P)H dehydrogenase B4 | chr2:8953252-8955699 REVERSE LENGTH=582	232	65331	6	5	11.2	582	2350	1	1	1	551.801	1101.59	2	1101.58	0.0053	356	364	0	40.53	36	0.0042	R	VLATDEWLR	V
1	RBR1	NGSrhino	Q Exactive	114	yes	AT2G20800	Symbols: NDB4 | NAD(P)H dehydrogenase B4 | chr2:8953252-8955699 REVERSE LENGTH=582	232	65331	6	5	11.2	582	2491	1	1	1	560.796	1119.58	2	1119.57	0.0022	563	571	0	41.01	37	0.0043	R	MLVISDWTR	R
1	RBR1	NGSrhino	Q Exactive	114	yes	AT2G20800	Symbols: NDB4 | NAD(P)H dehydrogenase B4 | chr2:8953252-8955699 REVERSE LENGTH=582	232	65331	6	5	11.2	582	3655	1	1	1	629.818	1257.62	2	1257.62	0.0024	213	223	0	72.77	35	1.8e-06	R	ASLPNLTEEER	K
1	RBR1	NGSrhino	Q Exactive	114	yes	AT2G20800	Symbols: NDB4 | NAD(P)H dehydrogenase B4 | chr2:8953252-8955699 REVERSE LENGTH=582	232	65331	6	5	11.2	582	7734	1	1	1	610.653	1828.94	3	1828.94	-0.002	266	281	0	83.74	35	1.7e-07	K	ITLLEAGDHILNMFDK	R
1	RBR1	NGSrhino	Q Exactive	114	yes	AT2G20800	Symbols: NDB4 | NAD(P)H dehydrogenase B4 | chr2:8953252-8955699 REVERSE LENGTH=582	232	65331	6	5	11.2	582	10141	1	1	1	1112.59	2223.16	2	2223.16	-0.0019	96	115	0	68.9	34	3.7e-06	R	NFFLFTPLLPSVTNGTVEAR	S	Deamidated (NQ)	0.00000000000002000000.0
1	RBR1	NGSrhino	Q Exactive	115	yes	AT3G23990	Symbols: HSP60, HSP60-3B | heat shock protein 60 | chr3:8669013-8672278 FORWARD LENGTH=577	230	61242	5	5	11.8	577	1006	1	0	0	466.756	931.497	2	931.497	-0.0008	426	434	0	64.3	38	2.4e-05	R	VTDALNATK	A
1	RBR1	NGSrhino	Q Exactive	115	yes	AT3G23990	Symbols: HSP60, HSP60-3B | heat shock protein 60 | chr3:8669013-8672278 FORWARD LENGTH=577	230	61242	5	5	11.8	577	1631	1	0	0	508.767	1015.52	2	1015.52	0.0012	49	58	0	71.47	36	3.1e-06	K	GVEDLADAVK	V
1	RBR1	NGSrhino	Q Exactive	115	yes	AT3G23990	Symbols: HSP60, HSP60-3B | heat shock protein 60 | chr3:8669013-8672278 FORWARD LENGTH=577	230	61242	5	5	11.8	577	3111	1	0	0	598.873	1195.73	2	1195.73	0.0021	468	478	0	27.75	25	0.0058	K	IGVQIIQNALK	T
1	RBR1	NGSrhino	Q Exactive	115	yes	AT3G23990	Symbols: HSP60, HSP60-3B | heat shock protein 60 | chr3:8669013-8672278 FORWARD LENGTH=577	230	61242	5	5	11.8	577	5675	1	0	0	754.888	1507.76	2	1507.76	0.0027	212	224	0	75.82	36	1.2e-06	K	TLFNELEVVEGMK	L
1	RBR1	NGSrhino	Q Exactive	115	yes	AT3G23990	Symbols: HSP60, HSP60-3B | heat shock protein 60 | chr3:8669013-8672278 FORWARD LENGTH=577	230	61242	5	5	11.8	577	11186	1	1	1	834.132	2499.37	3	2499.37	0.0046	533	557	0	103.8	29	4.1e-10	R	TALVDAASVSSLLTTTEAVVVDLPK	D
1	RBR1	NGSrhino	Q Exactive	116	yes	AT5G37510	Symbols: EMB1467, CI76 | NADH-ubiquinone dehydrogenase, mitochondrial, putative | chr5:14897490-14900352 FORWARD LENGTH=745	229	81130	5	5	11.5	745	1804	1	1	1	519.783	1037.55	2	1037.55	0.0008	484	493	0	50.73	34	0.00026	K	HLGTGPDTLK	E
1	RBR1	NGSrhino	Q Exactive	116	yes	AT5G37510	Symbols: EMB1467, CI76 | NADH-ubiquinone dehydrogenase, mitochondrial, putative | chr5:14897490-14900352 FORWARD LENGTH=745	229	81130	5	5	11.5	745	3762	1	1	1	634.804	1267.59	2	1267.59	0.0012	243	254	0	68.21	36	6.3e-06	R	GSGEEIGTYVEK	L
1	RBR1	NGSrhino	Q Exactive	116	yes	AT5G37510	Symbols: EMB1467, CI76 | NADH-ubiquinone dehydrogenase, mitochondrial, putative | chr5:14897490-14900352 FORWARD LENGTH=745	229	81130	5	5	11.5	745	4448	1	1	1	680.878	1359.74	2	1359.74	0.0022	614	626	0	37.7	34	0.0053	R	ANVILPASAFTEK	E
1	RBR1	NGSrhino	Q Exactive	116	yes	AT5G37510	Symbols: EMB1467, CI76 | NADH-ubiquinone dehydrogenase, mitochondrial, putative | chr5:14897490-14900352 FORWARD LENGTH=745	229	81130	5	5	11.5	745	6452	1	1	1	816.443	1630.87	2	1630.87	0.0027	227	242	0	68.47	35	4.7e-06	R	FASEVAGVQDLGILGR	G
1	RBR1	NGSrhino	Q Exactive	116	yes	AT5G37510	Symbols: EMB1467, CI76 | NADH-ubiquinone dehydrogenase, mitochondrial, putative | chr5:14897490-14900352 FORWARD LENGTH=745	229	81130	5	5	11.5	745	13475	1	1	1	912.727	3646.88	4	3646.89	-0.0163	363	397	1	106.09	31	3.6e-10	R	DALAVVGDIIHQVKPDEIVGVAGQLSDAESMMVLK	D
1	RBR1	NGSrhino	Q Exactive	117	yes	AT4G19006	Symbols: | Proteasome component (PCI) domain protein | chr4:10409349-10411347 REVERSE LENGTH=386	222	43993	4	3	9.1	386	3076	1	1	1	596.815	1191.61	2	1191.61	0.0014	2	11	0	69.7	36	5.3e-06	M	AALQYLESQK	N	Acetyl (Protein N-term)	1.0000000000.0
1	RBR1	NGSrhino	Q Exactive	117	yes	AT4G19006	Symbols: | Proteasome component (PCI) domain protein | chr4:10409349-10411347 REVERSE LENGTH=386	222	43993	4	3	9.1	386	4807	1	1	1	704.374	1406.73	2	1406.73	0.0035	90	102	0	78.61	36	5.7e-07	K	EAAVSYLEGVIEK	L
1	RBR1	NGSrhino	Q Exactive	117	yes	AT4G19006	Symbols: | Proteasome component (PCI) domain protein | chr4:10409349-10411347 REVERSE LENGTH=386	222	43993	4	3	9.1	386	4947	1	1	0	713.885	1425.75	2	1425.75	0.0009	311	322	0	97.55	34	5.1e-09	K	LSIEDVEHLLMK	S
1	RBR1	NGSrhino	Q Exactive	118	yes	AT3G04840	Symbols: | Ribosomal protein S3Ae | chr3:1329751-1331418 FORWARD LENGTH=262	220	29832	4	4	25.6	262	6389	1	1	1	810.45	1618.89	2	1618.88	0.0022	200	213	0	66.81	33	4.2e-06	K	ATQGIYPLQNVFIR	K
1	RBR1	NGSrhino	Q Exactive	118	yes	AT3G04840	Symbols: | Ribosomal protein S3Ae | chr3:1329751-1331418 FORWARD LENGTH=262	220	29832	4	4	25.6	262	7119	1	1	1	867.905	1733.8	2	1733.79	0.0025	228	243	0	76.45	35	8.6e-07	K	LMDVHGDYSAEDVGVK	V
1	RBR1	NGSrhino	Q Exactive	118	yes	AT3G04840	Symbols: | Ribosomal protein S3Ae | chr3:1329751-1331418 FORWARD LENGTH=262	220	29832	4	4	25.6	262	9160	1	1	1	1020.98	2039.94	2	2039.94	-0.0062	65	82	0	107.83	35	6.3e-10	R	VFEVSLADLQGDEDNAYR	K
1	RBR1	NGSrhino	Q Exactive	118	yes	AT3G04840	Symbols: | Ribosomal protein S3Ae | chr3:1329751-1331418 FORWARD LENGTH=262	220	29832	4	4	25.6	262	9163	1	1	1	1021.49	2040.97	2	2040.97	0.0035	244	262	1	40.51	36	0.0037	K	VDRPADEMAVEEPTEIIGA	-
1	RBR1	NGSrhino	Q Exactive	119	yes	AT3G25800	Symbols: PDF1, PR 65, PP2AA2 | protein phosphatase 2A subunit A2 | chr3:9422822-9425783 REVERSE LENGTH=587	218	65556	5	4	10.6	587	553	1	0	0	437.225	872.435	2	872.435	-0.0005	20	26	0	37.3	34	0.0052	K	NDDIQLR	L
1	RBR1	NGSrhino	Q Exactive	119	yes	AT3G25800	Symbols: PDF1, PR 65, PP2AA2 | protein phosphatase 2A subunit A2 | chr3:9422822-9425783 REVERSE LENGTH=587	218	65556	5	4	10.6	587	3546	1	0	0	622.795	1243.58	2	1243.58	-0.0033	326	336	0	71.72	34	1.9e-06	K	ELSSDSSQHVR	S
1	RBR1	NGSrhino	Q Exactive	119	yes	AT3G25800	Symbols: PDF1, PR 65, PP2AA2 | protein phosphatase 2A subunit A2 | chr3:9422822-9425783 REVERSE LENGTH=587	218	65556	5	4	10.6	587	7712	1	1	1	608.358	1822.05	3	1822.06	-0.0094	353	368	0	63.25	27	2.5e-06	K	DATIEHLLPIFLSLLK	D
1	RBR1	NGSrhino	Q Exactive	119	yes	AT3G25800	Symbols: PDF1, PR 65, PP2AA2 | protein phosphatase 2A subunit A2 | chr3:9422822-9425783 REVERSE LENGTH=587	218	65556	5	4	10.6	587	12804	1	0	0	1021.23	3060.67	3	3060.67	-0.0016	382	409	0	102.91	29	4.1e-10	K	LDQVNQVIGIDLLSQSLLPAIVELAEDR	H
1	RBR1	NGSrhino	Q Exactive	120	yes	AT5G23540	Symbols: | Mov34/MPN/PAD-1 family protein | chr5:7937772-7939339 FORWARD LENGTH=308	214	34332	4	4	22.4	308	145	1	1	1	410.24	818.466	2	818.465	0.0009	154	160	0	43.61	35	0.0016	K	VVIDAFR	S
1	RBR1	NGSrhino	Q Exactive	120	yes	AT5G23540	Symbols: | Mov34/MPN/PAD-1 family protein | chr5:7937772-7939339 FORWARD LENGTH=308	214	34332	4	4	22.4	308	4220	1	1	1	662.897	1323.78	2	1323.78	0.0024	139	151	0	67.62	27	9.1e-07	R	AVAVVVDPIQSVK	G
1	RBR1	NGSrhino	Q Exactive	120	yes	AT5G23540	Symbols: | Mov34/MPN/PAD-1 family protein | chr5:7937772-7939339 FORWARD LENGTH=308	214	34332	4	4	22.4	308	11018	1	1	1	815.061	2442.16	3	2442.16	-0.0034	46	67	0	90.34	36	3.7e-08	R	AGVPMEVMGLMLGEFVDEYTVR	V
1	RBR1	NGSrhino	Q Exactive	120	yes	AT5G23540	Symbols: | Mov34/MPN/PAD-1 family protein | chr5:7937772-7939339 FORWARD LENGTH=308	214	34332	4	4	22.4	308	12679	1	1	1	1005.5	3013.48	3	3013.49	-0.005	282	308	0	88.26	35	5.2e-08	K	HLEEHVSNLMSSNIVQTLGTMLDTVVF	-
1	RBR1	NGSrhino	Q Exactive	121	yes	AT1G26630	Symbols: FBR12, ATELF5A-2, ELF5A-2 | Eukaryotic translation initiation factor 5A-1 (eIF-5A 1) protein | chr1:9205968-9207098 FORWARD LENGTH=159	213	17129	4	3	30.2	159	356	1	1	1	424.74	847.465	2	847.465	-0.0002	41	48	0	47.96	36	0.00068	K	VVEVSTSK	T
1	RBR1	NGSrhino	Q Exactive	121	yes	AT1G26630	Symbols: FBR12, ATELF5A-2, ELF5A-2 | Eukaryotic translation initiation factor 5A-1 (eIF-5A 1) protein | chr1:9205968-9207098 FORWARD LENGTH=159	213	17129	4	3	30.2	159	7327	1	1	1	592.242	1773.7	3	1773.71	-0.0028	2	17	0	71.34	26	3.6e-07	M	SDDEHHFEASESGASK	T	Acetyl (Protein N-term)	1.0000000000000000.0
1	RBR1	NGSrhino	Q Exactive	121	yes	AT1G26630	Symbols: FBR12, ATELF5A-2, ELF5A-2 | Eukaryotic translation initiation factor 5A-1 (eIF-5A 1) protein | chr1:9205968-9207098 FORWARD LENGTH=159	213	17129	4	3	30.2	159	11553	1	1	1	1293.64	2585.27	2	2585.27	-0.0084	88	111	0	93.45	35	1.7e-08	R	VDYQLIDITEDGFVSLLTDSGGTK	D
1	RBR1	NGSrhino	Q Exactive	122	yes	AT5G10360	Symbols: EMB3010, RPS6B | Ribosomal protein S6e | chr5:3258734-3260142 REVERSE LENGTH=249	211	28144	5	4	17.3	249	194	1	1	0	414.24	826.466	2	826.466	-0.0003	65	72	0	55.62	30	2.9e-05	K	QGVLTPGR	V
1	RBR1	NGSrhino	Q Exactive	122	yes	AT5G10360	Symbols: EMB3010, RPS6B | Ribosomal protein S6e | chr5:3258734-3260142 REVERSE LENGTH=249	211	28144	5	4	17.3	249	1598	1	1	1	506.295	1010.58	2	1010.58	0	239	249	1	35.3	31	0.0044	R	LSSAPAKPVAA	-
1	RBR1	NGSrhino	Q Exactive	122	yes	AT5G10360	Symbols: EMB3010, RPS6B | Ribosomal protein S6e | chr5:3258734-3260142 REVERSE LENGTH=249	211	28144	5	4	17.3	249	1818	1	1	0	520.827	1039.64	2	1039.64	0.0012	183	191	0	38.15	27	0.00093	R	LVTPLTLQR	K
1	RBR1	NGSrhino	Q Exactive	122	yes	AT5G10360	Symbols: EMB3010, RPS6B | Ribosomal protein S6e | chr5:3258734-3260142 REVERSE LENGTH=249	211	28144	5	4	17.3	249	6328	1	1	1	804.891	1607.77	2	1607.77	-0.0002	32	46	0	102.92	37	2.6e-09	R	LSQEVSGDALGEEFK	G
1	RBR1	NGSrhino	Q Exactive	123	yes	AT1G10630	Symbols: ATARFA1F, ARFA1F | ADP-ribosylation factor A1F | chr1:3513189-3514230 REVERSE LENGTH=181	205	20610	6	5	35.4	181	1664	1	1	1	510.245	1018.48	2	1018.48	0.001	110	117	0	53.51	35	0.00016	R	MLNEDELR	D
1	RBR1	NGSrhino	Q Exactive	123	yes	AT1G10630	Symbols: ATARFA1F, ARFA1F | ADP-ribosylation factor A1F | chr1:3513189-3514230 REVERSE LENGTH=181	205	20610	6	5	35.4	181	2153	1	1	1	544.313	1086.61	2	1086.61	0.0003	20	30	0	64.09	35	1.4e-05	R	ILMVGLDAAGK	T
1	RBR1	NGSrhino	Q Exactive	123	yes	AT1G10630	Symbols: ATARFA1F, ARFA1F | ADP-ribosylation factor A1F | chr1:3513189-3514230 REVERSE LENGTH=181	205	20610	6	5	35.4	181	2164	1	1	1	545.318	1088.62	2	1088.62	-0.0016	118	127	0	56.69	32	4e-05	R	DAVLLVFANK	Q
1	RBR1	NGSrhino	Q Exactive	123	yes	AT1G10630	Symbols: ATARFA1F, ARFA1F | ADP-ribosylation factor A1F | chr1:3513189-3514230 REVERSE LENGTH=181	205	20610	6	5	35.4	181	6066	1	1	1	783.383	1564.75	2	1564.75	-0.0018	60	73	0	65.66	37	1.4e-05	K	NISFTVWDVGGQDK	I
1	RBR1	NGSrhino	Q Exactive	123	yes	AT1G10630	Symbols: ATARFA1F, ARFA1F | ADP-ribosylation factor A1F | chr1:3513189-3514230 REVERSE LENGTH=181	205	20610	6	5	35.4	181	10636	1	1	1	775.42	2323.24	3	2322.24	1.0013	39	59	0	58.89	32	2.4e-05	K	LGEIVTTIPTIGFNVETVEYK	N
1	RBR1	NGSrhino	Q Exactive	124	yes	AT3G16810	Symbols: APUM24, PUM24 | pumilio 24 | chr3:5723436-5727539 REVERSE LENGTH=641	203	71559	4	4	8.4	641	2493	1	1	1	560.809	1119.6	2	1119.6	-0.0002	275	284	0	38.53	36	0.0057	K	GIVDHTITHK	L
1	RBR1	NGSrhino	Q Exactive	124	yes	AT3G16810	Symbols: APUM24, PUM24 | pumilio 24 | chr3:5723436-5727539 REVERSE LENGTH=641	203	71559	4	4	8.4	641	3613	1	1	1	626.836	1251.66	2	1251.66	0.0003	33	43	0	74.07	35	1.5e-06	K	LVSGEQQQHVK	P
1	RBR1	NGSrhino	Q Exactive	124	yes	AT3G16810	Symbols: APUM24, PUM24 | pumilio 24 | chr3:5723436-5727539 REVERSE LENGTH=641	203	71559	4	4	8.4	641	7313	1	1	1	591.016	1770.03	3	1770.03	0	296	312	0	90.7	26	4e-09	K	TSAADVLQLLTGSLLLR	M
1	RBR1	NGSrhino	Q Exactive	124	yes	AT3G16810	Symbols: APUM24, PUM24 | pumilio 24 | chr3:5723436-5727539 REVERSE LENGTH=641	203	71559	4	4	8.4	641	8271	1	1	1	963.018	1924.02	2	1924.02	0.0023	221	236	0	81.91	34	1.6e-07	K	QELLAELYSTELQLFK	G
1	RBR1	NGSrhino	Q Exactive	125	yes	AT5G12370	Symbols: SEC10 | exocyst complex component sec10 | chr5:4003002-4008445 REVERSE LENGTH=825	202	89639	7	6	9	825	588	1	1	1	439.248	876.482	2	876.482	0.0002	286	292	0	49.8	36	0.00047	K	ILSQFNR	G
1	RBR1	NGSrhino	Q Exactive	125	yes	AT5G12370	Symbols: SEC10 | exocyst complex component sec10 | chr5:4003002-4008445 REVERSE LENGTH=825	202	89639	7	6	9	825	1216	1	1	1	481.27	960.525	2	960.524	0.0008	153	162	0	59.18	36	5.8e-05	R	ISSVGQTAAK	I
1	RBR1	NGSrhino	Q Exactive	125	yes	AT5G12370	Symbols: SEC10 | exocyst complex component sec10 | chr5:4003002-4008445 REVERSE LENGTH=825	202	89639	7	6	9	825	3119	1	1	1	599.299	1196.58	2	1196.58	0.0004	138	148	0	47.6	36	0.0008	K	GVDGLFESFAR	L
1	RBR1	NGSrhino	Q Exactive	125	yes	AT5G12370	Symbols: SEC10 | exocyst complex component sec10 | chr5:4003002-4008445 REVERSE LENGTH=825	202	89639	7	6	9	825	3302	1	1	1	609.834	1217.65	2	1217.65	0.0032	175	185	0	61.06	36	3.2e-05	R	ETASQTIDLIK	Y
1	RBR1	NGSrhino	Q Exactive	125	yes	AT5G12370	Symbols: SEC10 | exocyst complex component sec10 | chr5:4003002-4008445 REVERSE LENGTH=825	202	89639	7	6	9	825	4108	1	1	1	655.826	1309.64	2	1309.64	-0.001	163	174	0	56.98	36	9.4e-05	K	IGDHLQSADAQR	E
1	RBR1	NGSrhino	Q Exactive	125	yes	AT5G12370	Symbols: SEC10 | exocyst complex component sec10 | chr5:4003002-4008445 REVERSE LENGTH=825	202	89639	7	6	9	825	10919	1	1	1	803.085	2406.23	3	2406.25	-0.013	75	97	0	47.45	35	0.00065	R	GQSAPLSSAPFFPEVDGLLSLFK	D
1	RBR1	NGSrhino	Q Exactive	126	yes	AT3G05060	Symbols: | NOP56-like pre RNA processing ribonucleoprotein | chr3:1413174-1415564 REVERSE LENGTH=533	197	58966	3	2	6.8	533	7945	1	1	1	625.005	1871.99	3	1871.99	0.003	157	173	0	70.89	34	2.3e-06	K	VDTMIIQAIGLLDDLDK	E
1	RBR1	NGSrhino	Q Exactive	126	yes	AT3G05060	Symbols: | NOP56-like pre RNA processing ribonucleoprotein | chr3:1413174-1415564 REVERSE LENGTH=533	197	58966	3	2	6.8	533	8341	1	1	1	970.537	1939.06	2	1939.06	0.0028	278	296	0	92.09	31	9.1e-09	R	MNTIAPNLTALVGELVGAR	L
1	RBR1	NGSrhino	Q Exactive	127	yes	AT5G22060	Symbols: ATJ2, J2 | DNAJ homologue 2 | chr5:7303798-7305668 REVERSE LENGTH=419	197	46409	5	5	13.1	419	981	1	0	0	465.269	928.523	2	928.523	-0.0001	222	229	0	44.03	33	0.00094	K	VLEVNVEK	G
1	RBR1	NGSrhino	Q Exactive	127	yes	AT5G22060	Symbols: ATJ2, J2 | DNAJ homologue 2 | chr5:7303798-7305668 REVERSE LENGTH=419	197	46409	5	5	13.1	419	1997	1	0	0	533.303	1064.59	2	1064.59	0.0018	15	23	0	42.38	32	0.0011	K	FYEILGVPK	T
1	RBR1	NGSrhino	Q Exactive	127	yes	AT5G22060	Symbols: ATJ2, J2 | DNAJ homologue 2 | chr5:7303798-7305668 REVERSE LENGTH=419	197	46409	5	5	13.1	419	4217	1	1	1	662.854	1323.69	2	1323.69	0.0018	128	139	0	82.2	35	2.2e-07	K	VSLEDVYLGTTK	K
1	RBR1	NGSrhino	Q Exactive	127	yes	AT5G22060	Symbols: ATJ2, J2 | DNAJ homologue 2 | chr5:7303798-7305668 REVERSE LENGTH=419	197	46409	5	5	13.1	419	4560	1	0	0	690.335	1378.66	2	1378.66	0.0004	317	328	0	70.06	36	4.6e-06	K	AISDEGMPIYQR	P
1	RBR1	NGSrhino	Q Exactive	127	yes	AT5G22060	Symbols: ATJ2, J2 | DNAJ homologue 2 | chr5:7303798-7305668 REVERSE LENGTH=419	197	46409	5	5	13.1	419	6256	1	0	0	796.396	1590.78	2	1590.78	0.0008	54	67	0	60.88	37	4.2e-05	K	ELAQAYEVLSDPEK	R
1	RBR1	NGSrhino	Q Exactive	128	yes	AT5G09900	Symbols: EMB2107, RPN5A, MSA | 26S proteasome regulatory subunit, putative (RPN5) | chr5:3089462-3092434 REVERSE LENGTH=442	197	50805	4	4	13.8	442	992	1	1	1	465.754	929.493	2	929.493	0	23	31	0	56.49	36	9.5e-05	R	LAENVAGTR	K
1	RBR1	NGSrhino	Q Exactive	128	yes	AT5G09900	Symbols: EMB2107, RPN5A, MSA | 26S proteasome regulatory subunit, putative (RPN5) | chr5:3089462-3092434 REVERSE LENGTH=442	197	50805	4	4	13.8	442	2156	1	1	1	544.826	1087.64	2	1087.64	-0.0012	150	158	0	59.32	32	1.9e-05	K	IAFILEQVR	L
1	RBR1	NGSrhino	Q Exactive	128	yes	AT5G09900	Symbols: EMB2107, RPN5A, MSA | 26S proteasome regulatory subunit, putative (RPN5) | chr5:3089462-3092434 REVERSE LENGTH=442	197	50805	4	4	13.8	442	6890	1	1	1	845.402	1688.79	2	1688.8	-0.0103	403	417	0	51.49	35	0.00028	K	DSNEILNSWAGNLEK	L
1	RBR1	NGSrhino	Q Exactive	128	yes	AT5G09900	Symbols: EMB2107, RPN5A, MSA | 26S proteasome regulatory subunit, putative (RPN5) | chr5:3089462-3092434 REVERSE LENGTH=442	197	50805	4	4	13.8	442	12672	1	1	1	1003.16	3006.47	3	3006.47	-0.0018	119	146	1	112.24	35	2.2e-10	K	IKEEQGQIAEAADLMQEVAVETFGAMAK	T
1	RBR1	NGSrhino	Q Exactive	129	yes	AT1G14320	Symbols: SAC52, RPL10, RPL10A | Ribosomal protein L16p/L10e family protein | chr1:4888270-4889408 FORWARD LENGTH=220	195	24901	5	4	19.1	220	181	1	1	1	413.212	824.41	2	824.41	-0.0006	33	39	0	38.39	35	0.0046	R	IYDVGMK	R
1	RBR1	NGSrhino	Q Exactive	129	yes	AT1G14320	Symbols: SAC52, RPL10, RPL10A | Ribosomal protein L16p/L10e family protein | chr1:4888270-4889408 FORWARD LENGTH=220	195	24901	5	4	19.1	220	2759	1	1	1	577.869	1153.72	2	1153.72	0.0048	129	139	0	85.24	25	1e-08	R	VAIGQVLLSVR	C
1	RBR1	NGSrhino	Q Exactive	129	yes	AT1G14320	Symbols: SAC52, RPL10, RPL10A | Ribosomal protein L16p/L10e family protein | chr1:4888270-4889408 FORWARD LENGTH=220	195	24901	5	4	19.1	220	3810	1	1	1	638.313	1274.61	2	1274.61	0.0015	58	69	0	73.97	36	1.6e-06	K	ENVSSEALEAAR	I
1	RBR1	NGSrhino	Q Exactive	129	yes	AT1G14320	Symbols: SAC52, RPL10, RPL10A | Ribosomal protein L16p/L10e family protein | chr1:4888270-4889408 FORWARD LENGTH=220	195	24901	5	4	19.1	220	4325	1	1	1	671.323	1340.63	2	1340.63	-0.0013	142	153	0	62.17	35	2.4e-05	K	DAHGHHAQEALR	R
1	RBR1	NGSrhino	Q Exactive	130	yes	AT5G45620	Symbols: | Proteasome component (PCI) domain protein | chr5:18501590-18503868 FORWARD LENGTH=386	191	44140	4	3	8.8	386	2946	1	1	1	589.326	1176.64	2	1176.64	-0.0019	2	11	0	70.22	35	3.3e-06	M	AALQYLESLK	N	Acetyl (Protein N-term)	1.0000000000.0
1	RBR1	NGSrhino	Q Exactive	130	yes	AT5G45620	Symbols: | Proteasome component (PCI) domain protein | chr5:18501590-18503868 FORWARD LENGTH=386	191	44140	4	3	8.8	386	4947	1	0	0	713.885	1425.75	2	1425.75	0.0009	311	322	0	97.55	34	5.1e-09	K	LSIEDVEHLLMK	S
1	RBR1	NGSrhino	Q Exactive	130	yes	AT5G45620	Symbols: | Proteasome component (PCI) domain protein | chr5:18501590-18503868 FORWARD LENGTH=386	191	44140	4	3	8.8	386	5172	1	1	1	724.911	1447.81	2	1446.8	1.01	111	122	0	43.37	32	0.00078	R	ITEPIIYIETQK	A
1	RBR1	NGSrhino	Q Exactive	131	yes	ATMG00070	Symbols: NAD9 | NADH dehydrogenase subunit 9 | chrM:23663-24235 REVERSE LENGTH=190	188	22673	4	3	21.1	190	2365	1	1	1	553.276	1104.54	2	1104.54	-0.0039	88	97	0	83.38	36	2.2e-07	R	VQTSADEVTR	I
1	RBR1	NGSrhino	Q Exactive	131	yes	ATMG00070	Symbols: NAD9 | NADH dehydrogenase subunit 9 | chrM:23663-24235 REVERSE LENGTH=190	188	22673	4	3	21.1	190	6058	1	1	1	782.885	1563.76	2	1563.76	-0.0037	164	176	0	81.91	37	3.3e-07	R	VVSEPIEMTQEFR	Y
1	RBR1	NGSrhino	Q Exactive	131	yes	ATMG00070	Symbols: NAD9 | NADH dehydrogenase subunit 9 | chrM:23663-24235 REVERSE LENGTH=190	188	22673	4	3	21.1	190	9237	1	1	1	687.999	2060.98	3	2060.98	-0.0014	114	130	0	61	36	3.5e-05	R	EVWDMFGVSFINHPDLR	R
1	RBR1	NGSrhino	Q Exactive	132	yes	AT2G32730	Symbols: | 26S proteasome regulatory complex, non-ATPase subcomplex, Rpn2/Psmd1 subunit | chr2:13880189-13885464 FORWARD LENGTH=1004	187	108909	4	3	3.7	1004	1845	1	1	1	522.827	1043.64	2	1043.64	0.0022	941	950	0	43.32	29	0.00045	K	LAPSGFVLLK	D
1	RBR1	NGSrhino	Q Exactive	132	yes	AT2G32730	Symbols: | 26S proteasome regulatory complex, non-ATPase subcomplex, Rpn2/Psmd1 subunit | chr2:13880189-13885464 FORWARD LENGTH=1004	187	108909	4	3	3.7	1004	3390	1	1	1	410.232	1227.67	3	1227.67	0.0005	411	422	0	79.35	34	3.5e-07	K	FSATAGLGVIHR	G
1	RBR1	NGSrhino	Q Exactive	132	yes	AT2G32730	Symbols: | 26S proteasome regulatory complex, non-ATPase subcomplex, Rpn2/Psmd1 subunit | chr2:13880189-13885464 FORWARD LENGTH=1004	187	108909	4	3	3.7	1004	5324	1	1	1	737.362	1472.71	2	1472.71	-0.0019	866	880	1	79.31	35	4.7e-07	K	TSGPEKPVNESGSGK	G
1	RBR1	NGSrhino	Q Exactive	133	yes	AT1G24510	Symbols: | TCP-1/cpn60 chaperonin family protein | chr1:8685504-8688101 REVERSE LENGTH=535	183	59347	2	2	7.5	535	6465	1	1	1	817.949	1633.88	2	1633.88	0.0017	215	228	0	102.95	34	1.4e-09	K	LEDTELIYGILIDK	D
1	RBR1	NGSrhino	Q Exactive	133	yes	AT1G24510	Symbols: | TCP-1/cpn60 chaperonin family protein | chr1:8685504-8688101 REVERSE LENGTH=535	183	59347	2	2	7.5	535	11808	1	1	1	903.771	2708.29	3	2708.3	-0.0058	93	118	0	106.09	36	1e-09	R	SQDYEIGDGTTGVVVMAGALLEQAER	Q
1	RBR1	NGSrhino	Q Exactive	134	yes	AT4G02030	Symbols: | Vps51/Vps67 family (components of vesicular transport) protein | chr4:892262-897175 FORWARD LENGTH=780	182	88461	3	3	6.3	780	3101	1	1	1	598.33	1194.65	2	1194.64	0.0063	341	351	0	67.35	33	4.1e-06	R	VSAADFLGIFR	I
1	RBR1	NGSrhino	Q Exactive	134	yes	AT4G02030	Symbols: | Vps51/Vps67 family (components of vesicular transport) protein | chr4:892262-897175 FORWARD LENGTH=780	182	88461	3	3	6.3	780	7339	1	1	1	592.64	1774.9	3	1774.89	0.0045	388	402	0	64.45	36	1.7e-05	R	MFSHLQQDISDTLLK	F
1	RBR1	NGSrhino	Q Exactive	134	yes	AT4G02030	Symbols: | Vps51/Vps67 family (components of vesicular transport) protein | chr4:892262-897175 FORWARD LENGTH=780	182	88461	3	3	6.3	780	11192	1	1	1	835.417	2503.23	3	2503.23	-0.0033	725	747	0	99.27	35	4.6e-09	K	EAVEDEAAIDFLLDEVIVAASER	C
1	RBR1	NGSrhino	Q Exactive	135	yes	AT4G16720	Symbols: | Ribosomal protein L23/L15e family protein | chr4:9400156-9401315 REVERSE LENGTH=204	180	24224	3	3	19.1	204	2143	1	1	1	543.301	1084.59	2	1084.59	-0.0003	84	93	0	75.48	33	6.1e-07	K	PTNQGVTQLK	F
1	RBR1	NGSrhino	Q Exactive	135	yes	AT4G16720	Symbols: | Ribosomal protein L23/L15e family protein | chr4:9400156-9401315 REVERSE LENGTH=204	180	24224	3	3	19.1	204	7009	1	1	1	859.407	1716.8	2	1716.8	-0.0002	115	128	0	79.12	35	4.1e-07	R	VVNSYWLNEDSTYK	Y
1	RBR1	NGSrhino	Q Exactive	135	yes	AT4G16720	Symbols: | Ribosomal protein L23/L15e family protein | chr4:9400156-9401315 REVERSE LENGTH=204	180	24224	3	3	19.1	204	7320	1	1	1	591.648	1771.92	3	1771.93	-0.0038	129	143	0	73.89	35	1.5e-06	K	YYEIILVDPAHNAVR	N
1	RBR1	NGSrhino	Q Exactive	136	yes	AT1G20200	Symbols: EMB2719, HAP15 | PAM domain (PCI/PINT associated module) protein | chr1:7001409-7004154 REVERSE LENGTH=488	177	55548	5	5	13.5	488	1809	1	1	0	520.311	1038.61	2	1038.61	0.001	290	298	0	41.45	29	0.00062	R	LLLGEIPER	S
1	RBR1	NGSrhino	Q Exactive	136	yes	AT1G20200	Symbols: EMB2719, HAP15 | PAM domain (PCI/PINT associated module) protein | chr1:7001409-7004154 REVERSE LENGTH=488	177	55548	5	5	13.5	488	2412	1	1	1	556.774	1111.53	2	1111.53	0.003	335	343	0	37.68	35	0.0066	K	FLDTFAQDR	T
1	RBR1	NGSrhino	Q Exactive	136	yes	AT1G20200	Symbols: EMB2719, HAP15 | PAM domain (PCI/PINT associated module) protein | chr1:7001409-7004154 REVERSE LENGTH=488	177	55548	5	5	13.5	488	2986	1	1	0	591.306	1180.6	2	1180.6	-0.0005	251	260	0	48.38	36	0.00065	R	TIQLEYTDAK	E
1	RBR1	NGSrhino	Q Exactive	136	yes	AT1G20200	Symbols: EMB2719, HAP15 | PAM domain (PCI/PINT associated module) protein | chr1:7001409-7004154 REVERSE LENGTH=488	177	55548	5	5	13.5	488	7283	1	1	0	588.662	1762.96	3	1762.96	0.0066	196	210	0	102.43	32	9.2e-10	R	HDELGQETLLNLLLR	N
1	RBR1	NGSrhino	Q Exactive	136	yes	AT1G20200	Symbols: EMB2719, HAP15 | PAM domain (PCI/PINT associated module) protein | chr1:7001409-7004154 REVERSE LENGTH=488	177	55548	5	5	13.5	488	10862	1	1	1	797.416	2389.23	3	2389.23	-0.0018	61	83	0	46.36	35	0.00077	K	LTGSVLSSFLDFALVPGSEAHSR	L
1	RBR1	NGSrhino	Q Exactive	137	yes	AT3G08943	Symbols: | ARM repeat superfamily protein | chr3:2719198-2721911 REVERSE LENGTH=871	176	96339	4	3	4.6	871	1149	1	1	1	477.772	953.53	2	953.529	0.0004	110	118	0	35.98	32	0.0042	R	HTSAQVIAK	V
1	RBR1	NGSrhino	Q Exactive	137	yes	AT3G08943	Symbols: | ARM repeat superfamily protein | chr3:2719198-2721911 REVERSE LENGTH=871	176	96339	4	3	4.6	871	6029	1	1	1	780.411	1558.81	2	1558.8	0.0038	767	780	0	66.92	36	9.1e-06	R	SIFEAYSGILQGFK	D
1	RBR1	NGSrhino	Q Exactive	137	yes	AT3G08943	Symbols: | ARM repeat superfamily protein | chr3:2719198-2721911 REVERSE LENGTH=871	176	96339	4	3	4.6	871	7270	1	1	1	879.994	1757.97	2	1757.97	-0.0009	404	420	0	76.5	32	4e-07	K	LAPMVAAGLEFLLNATK	D
1	RBR1	NGSrhino	Q Exactive	138	yes	AT2G01350	Symbols: QPT | quinolinate phoshoribosyltransferase | chr2:165332-167209 REVERSE LENGTH=348	175	37931	3	2	9.5	348	3012	1	1	1	592.8	1183.59	2	1183.58	0.0054	195	204	0	77.94	35	5.4e-07	R	MGLFDMVMIK	D
1	RBR1	NGSrhino	Q Exactive	138	yes	AT2G01350	Symbols: QPT | quinolinate phoshoribosyltransferase | chr2:165332-167209 REVERSE LENGTH=348	175	37931	3	2	9.5	348	10968	1	1	1	1213.62	2425.22	2	2425.22	0.0031	85	107	0	74.37	36	1.5e-06	K	EDGIVAGVALADMIFEHVDPSLK	V
1	RBR1	NGSrhino	Q Exactive	139	yes	AT1G52360	Symbols: | Coatomer, beta~ subunit | chr1:19499282-19505397 FORWARD LENGTH=926	174	104401	3	3	4.1	926	2042	1	1	1	536.812	1071.61	2	1071.61	0.0028	767	775	0	67.4	35	6.7e-06	K	VSEIVALWR	K
1	RBR1	NGSrhino	Q Exactive	139	yes	AT1G52360	Symbols: | Coatomer, beta~ subunit | chr1:19499282-19505397 FORWARD LENGTH=926	174	104401	3	3	4.1	926	4938	1	1	1	712.379	1422.74	2	1422.74	0.0013	286	298	0	77.67	36	6.8e-07	R	VVIGYDEGTIMVK	L
1	RBR1	NGSrhino	Q Exactive	139	yes	AT1G52360	Symbols: | Coatomer, beta~ subunit | chr1:19499282-19505397 FORWARD LENGTH=926	174	104401	3	3	4.1	926	7596	1	1	1	904.927	1807.84	2	1807.83	0.0099	630	645	0	84.68	36	1.4e-07	R	GMIEDALEIATDPDYR	F
1	RBR1	NGSrhino	Q Exactive	140	yes	AT1G61990	Symbols: | Mitochondrial transcription termination factor family protein | chr1:22911453-22912697 FORWARD LENGTH=414	174	46219	4	4	11.1	414	1481	1	1	1	498.349	994.683	2	994.679	0.0036	198	206	0	48.36	20	1.5e-05	R	LLLPLLVSK	S
1	RBR1	NGSrhino	Q Exactive	140	yes	AT1G61990	Symbols: | Mitochondrial transcription termination factor family protein | chr1:22911453-22912697 FORWARD LENGTH=414	174	46219	4	4	11.1	414	3562	1	1	1	623.844	1245.67	2	1245.67	0.0023	82	92	0	67.29	36	7.5e-06	K	VNPDSVLSLFR	S
1	RBR1	NGSrhino	Q Exactive	140	yes	AT1G61990	Symbols: | Mitochondrial transcription termination factor family protein | chr1:22911453-22912697 FORWARD LENGTH=414	174	46219	4	4	11.1	414	4429	1	1	1	679.833	1357.65	2	1357.65	0	288	299	0	66.84	35	7.4e-06	K	SAETFLDLGYSR	A
1	RBR1	NGSrhino	Q Exactive	140	yes	AT1G61990	Symbols: | Mitochondrial transcription termination factor family protein | chr1:22911453-22912697 FORWARD LENGTH=414	174	46219	4	4	11.1	414	6721	1	1	1	828.417	1654.82	2	1654.82	-0.0042	259	272	0	59.33	36	5.2e-05	R	SLGFTVDDVWEIFK	K
1	RBR1	NGSrhino	Q Exactive	141	yes	AT4G28470	Symbols: RPN1B, ATRPN1B | 26S proteasome regulatory subunit S2 1B | chr4:14067082-14072357 REVERSE LENGTH=891	173	97892	5	5	6.7	891	1676	1	0	0	511.272	1020.53	2	1020.53	0.0014	686	694	0	40.27	36	0.0042	K	VTVMDTLSR	L
1	RBR1	NGSrhino	Q Exactive	141	yes	AT4G28470	Symbols: RPN1B, ATRPN1B | 26S proteasome regulatory subunit S2 1B | chr4:14067082-14072357 REVERSE LENGTH=891	173	97892	5	5	6.7	891	2504	1	0	0	561.812	1121.61	2	1121.61	0.0008	325	334	0	65.51	35	1e-05	K	LSEGYLTLAR	D
1	RBR1	NGSrhino	Q Exactive	141	yes	AT4G28470	Symbols: RPN1B, ATRPN1B | 26S proteasome regulatory subunit S2 1B | chr4:14067082-14072357 REVERSE LENGTH=891	173	97892	5	5	6.7	891	3631	1	0	0	628.343	1254.67	2	1254.67	0.0034	828	840	0	89.8	33	2.5e-08	R	VGQAVDVVGQAGR	P
1	RBR1	NGSrhino	Q Exactive	141	yes	AT4G28470	Symbols: RPN1B, ATRPN1B | 26S proteasome regulatory subunit S2 1B | chr4:14067082-14072357 REVERSE LENGTH=891	173	97892	5	5	6.7	891	4781	1	0	0	702.438	1402.86	2	1402.86	0.0022	562	574	0	55.23	21	3.9e-06	R	FLPLGLGLLYLGK	Q
1	RBR1	NGSrhino	Q Exactive	141	yes	AT4G28470	Symbols: RPN1B, ATRPN1B | 26S proteasome regulatory subunit S2 1B | chr4:14067082-14072357 REVERSE LENGTH=891	173	97892	5	5	6.7	891	6954	1	1	1	851.513	1701.01	2	1701.01	-0.0008	869	883	0	39.47	22	0.0002	K	YIPLSPILEGFVILK	E
1	RBR1	NGSrhino	Q Exactive	142	yes	AT1G10840	Symbols: TIF3H1 | translation initiation factor 3 subunit H1 | chr1:3607885-3610299 REVERSE LENGTH=337	172	38348	3	3	14.8	337	7304	1	1	1	884.936	1767.86	2	1767.85	0.0022	176	189	0	74.09	36	1.8e-06	K	NFSWMDIFEEIPIK	V
1	RBR1	NGSrhino	Q Exactive	142	yes	AT1G10840	Symbols: TIF3H1 | translation initiation factor 3 subunit H1 | chr1:3607885-3610299 REVERSE LENGTH=337	172	38348	3	3	14.8	337	8433	1	1	1	978.464	1954.91	2	1954.92	-0.0034	276	293	0	76	36	1.1e-06	K	SAGEEPLPEEDPSNPIFK	A
1	RBR1	NGSrhino	Q Exactive	142	yes	AT1G10840	Symbols: TIF3H1 | translation initiation factor 3 subunit H1 | chr1:3607885-3610299 REVERSE LENGTH=337	172	38348	3	3	14.8	337	9535	1	1	1	707.694	2120.06	3	2120.06	0.0002	217	234	0	69.77	36	4.2e-06	R	LHSSTTPFLENNMEFLIK	C
1	RBR1	NGSrhino	Q Exactive	143	yes	AT1G23290	Symbols: RPL27A, RPL27AB | Ribosomal protein L18e/L15 superfamily protein | chr1:8263007-8263447 FORWARD LENGTH=146	172	16282	4	3	24	146	2043	1	1	1	537.244	1072.47	2	1072.47	-0.0003	33	42	0	77.95	32	2.9e-07	R	GNAGGMHHHR	I
1	RBR1	NGSrhino	Q Exactive	143	yes	AT1G23290	Symbols: RPL27A, RPL27AB | Ribosomal protein L18e/L15 superfamily protein | chr1:8263007-8263447 FORWARD LENGTH=146	172	16282	4	3	24	146	3021	1	1	1	593.33	1184.65	2	1184.64	0.0022	78	87	0	49.68	33	0.00024	K	LWSLVPEDVK	A
1	RBR1	NGSrhino	Q Exactive	143	yes	AT1G23290	Symbols: RPL27A, RPL27AB | Ribosomal protein L18e/L15 superfamily protein | chr1:8263007-8263447 FORWARD LENGTH=146	172	16282	4	3	24	146	7093	1	1	1	865.451	1728.89	2	1728.88	0.004	93	107	0	60.52	35	3.4e-05	K	DNVPLIDVTQHGFFK	V
1	RBR1	NGSrhino	Q Exactive	144	yes	AT5G43780	Symbols: APS4 | Pseudouridine synthase/archaeosine transglycosylase-like family protein | chr5:17589631-17591480 REVERSE LENGTH=469	171	52093	5	5	12.6	469	329	1	1	1	422.769	843.524	2	843.522	0.0022	387	393	0	38.11	33	0.0037	R	LNILPFK	V
1	RBR1	NGSrhino	Q Exactive	144	yes	AT5G43780	Symbols: APS4 | Pseudouridine synthase/archaeosine transglycosylase-like family protein | chr5:17589631-17591480 REVERSE LENGTH=469	171	52093	5	5	12.6	469	2041	1	1	0	536.795	1071.58	2	1071.57	0.0005	377	386	0	44.66	35	0.0011	K	VLSMAPGLER	L
1	RBR1	NGSrhino	Q Exactive	144	yes	AT5G43780	Symbols: APS4 | Pseudouridine synthase/archaeosine transglycosylase-like family protein | chr5:17589631-17591480 REVERSE LENGTH=469	171	52093	5	5	12.6	469	3048	1	1	1	595.316	1188.62	2	1188.62	0.0011	61	70	0	62.83	37	2.8e-05	K	LMNLVVEESR	R
1	RBR1	NGSrhino	Q Exactive	144	yes	AT5G43780	Symbols: APS4 | Pseudouridine synthase/archaeosine transglycosylase-like family protein | chr5:17589631-17591480 REVERSE LENGTH=469	171	52093	5	5	12.6	469	5512	1	1	1	741.938	1481.86	2	1481.86	0.001	278	291	0	66.88	27	1.1e-06	K	NPVLLLNPLGGFTK	A
1	RBR1	NGSrhino	Q Exactive	144	yes	AT5G43780	Symbols: APS4 | Pseudouridine synthase/archaeosine transglycosylase-like family protein | chr5:17589631-17591480 REVERSE LENGTH=469	171	52093	5	5	12.6	469	9255	1	1	1	689.033	2064.08	3	2064.07	0.0097	90	107	0	73.44	34	1.4e-06	R	VDLEWVHVLSEGWASPLK	G
1	RBR1	NGSrhino	Q Exactive	145	yes	AT2G39990	Symbols: EIF2, AteIF3f, eIF3F | eukaryotic translation initiation factor 2 | chr2:16698332-16699929 REVERSE LENGTH=293	171	31842	4	4	22.9	293	2570	1	1	1	566.326	1130.64	2	1130.63	0.0033	239	249	0	69.79	35	3.4e-06	R	FIADAVASLPK	L
1	RBR1	NGSrhino	Q Exactive	145	yes	AT2G39990	Symbols: EIF2, AteIF3f, eIF3F | eukaryotic translation initiation factor 2 | chr2:16698332-16699929 REVERSE LENGTH=293	171	31842	4	4	22.9	293	3069	1	1	1	596.355	1190.69	2	1190.69	0.0039	211	220	0	59.24	30	1.3e-05	R	LLTLINDVYK	Y
1	RBR1	NGSrhino	Q Exactive	145	yes	AT2G39990	Symbols: EIF2, AteIF3f, eIF3F | eukaryotic translation initiation factor 2 | chr2:16698332-16699929 REVERSE LENGTH=293	171	31842	4	4	22.9	293	7799	1	1	1	613.693	1838.06	3	1838.05	0.0065	52	69	0	36.59	27	0.0013	R	VIGTLLGSILPDGTVDIR	N
1	RBR1	NGSrhino	Q Exactive	145	yes	AT2G39990	Symbols: EIF2, AteIF3f, eIF3F | eukaryotic translation initiation factor 2 | chr2:16698332-16699929 REVERSE LENGTH=293	171	31842	4	4	22.9	293	12998	1	1	1	1072.24	3213.71	3	3213.73	-0.0156	250	277	0	80.85	30	9.6e-08	K	LPPQVFDNLVNDSLQDQLLLLYLSSITR	T
1	RBR1	NGSrhino	Q Exactive	146	yes	AT3G07770	Symbols: Hsp89.1, AtHsp90.6, AtHsp90-6 | HEAT SHOCK PROTEIN 89.1 | chr3:2479611-2483970 FORWARD LENGTH=799	169	90510	3	2	3.6	799	2552	1	1	0	564.771	1127.53	2	1127.52	0.003	97	105	0	64.27	35	1.2e-05	K	FEYQAEVSR	L
1	RBR1	NGSrhino	Q Exactive	146	yes	AT3G07770	Symbols: Hsp89.1, AtHsp90.6, AtHsp90-6 | HEAT SHOCK PROTEIN 89.1 | chr3:2479611-2483970 FORWARD LENGTH=799	169	90510	3	2	3.6	799	10110	1	1	1	739.079	2214.22	3	2213.22	0.9956	581	600	0	86.85	31	3e-08	K	GLEVLYLVEPIDEVAVQSLK	A
1	RBR1	NGSrhino	Q Exactive	147	yes	AT3G54470	Symbols: | uridine 5~-monophosphate synthase / UMP synthase (PYRE-F) (UMPS) | chr3:20168285-20170245 REVERSE LENGTH=476	169	51817	2	2	8.4	476	7920	1	1	1	933.014	1864.01	2	1864.01	0.0012	2	18	0	99.14	32	2.2e-09	M	SAMEALILQLHEIGAVK	F	Acetyl (Protein N-term)	1.00000000000000000.0
1	RBR1	NGSrhino	Q Exactive	147	yes	AT3G54470	Symbols: | uridine 5~-monophosphate synthase / UMP synthase (PYRE-F) (UMPS) | chr3:20168285-20170245 REVERSE LENGTH=476	169	51817	2	2	8.4	476	10978	1	1	1	810.786	2429.34	3	2429.33	0.0048	324	346	0	94.88	28	2.6e-09	K	ILEWADIINAHVISGPGIVDGLK	L
1	RBR1	NGSrhino	Q Exactive	148	yes	AT2G41840	Symbols: | Ribosomal protein S5 family protein | chr2:17460016-17461398 REVERSE LENGTH=285	168	30859	3	3	14.7	285	5849	1	1	1	508.244	1521.71	3	1521.71	0.0014	258	270	0	60.78	36	3.8e-05	R	SPYQEHTDFLASK	A
1	RBR1	NGSrhino	Q Exactive	148	yes	AT2G41840	Symbols: | Ribosomal protein S5 family protein | chr2:17460016-17461398 REVERSE LENGTH=285	168	30859	3	3	14.7	285	6460	1	1	1	817.447	1632.88	2	1632.88	0.0002	84	97	0	74.29	34	1e-06	K	EYQIIDMLIGPTLK	D
1	RBR1	NGSrhino	Q Exactive	148	yes	AT2G41840	Symbols: | Ribosomal protein S5 family protein | chr2:17460016-17461398 REVERSE LENGTH=285	168	30859	3	3	14.7	285	6716	1	1	1	827.928	1653.84	2	1653.84	0.0062	207	221	0	85.92	35	1e-07	K	VLQFAGIDDVFTSSR	G
1	RBR1	NGSrhino	Q Exactive	149	yes	AT1G65220	Symbols: | ARM repeat superfamily protein | chr1:24226204-24228799 FORWARD LENGTH=411	168	47031	3	3	10.5	411	4440	1	0	0	680.401	1358.79	2	1358.78	0.0061	101	112	0	54.22	30	4.6e-05	R	EAILPSVVYIQK	I
1	RBR1	NGSrhino	Q Exactive	149	yes	AT1G65220	Symbols: | ARM repeat superfamily protein | chr1:24226204-24228799 FORWARD LENGTH=411	168	47031	3	3	10.5	411	6709	1	0	0	827.41	1652.81	2	1652.8	0.0017	131	143	0	76.55	36	1e-06	R	FLQSLELFEENER	K
1	RBR1	NGSrhino	Q Exactive	149	yes	AT1G65220	Symbols: | ARM repeat superfamily protein | chr1:24226204-24228799 FORWARD LENGTH=411	168	47031	3	3	10.5	411	10191	1	1	1	746.048	2235.12	3	2235.12	0.0021	365	382	0	86.87	36	8.2e-08	R	SLYELDVLAEDTILHWYR	K
1	RBR1	NGSrhino	Q Exactive	150	yes	AT3G03960	Symbols: | TCP-1/cpn60 chaperonin family protein | chr3:1024432-1027604 FORWARD LENGTH=549	165	58902	3	3	12	549	5941	1	1	1	769.93	1537.85	2	1537.85	-0.0006	411	425	0	70.04	32	1.6e-06	R	IVPGAAATEIELAQR	L
1	RBR1	NGSrhino	Q Exactive	150	yes	AT3G03960	Symbols: | TCP-1/cpn60 chaperonin family protein | chr3:1024432-1027604 FORWARD LENGTH=549	165	58902	3	3	12	549	10870	1	1	1	798.763	2393.27	3	2393.26	0.0073	63	84	0	60.8	33	1.8e-05	K	LFVTNDAATIVNELEIQHPAAK	L
1	RBR1	NGSrhino	Q Exactive	150	yes	AT3G03960	Symbols: | TCP-1/cpn60 chaperonin family protein | chr3:1024432-1027604 FORWARD LENGTH=549	165	58902	3	3	12	549	12908	1	1	1	1043.85	3128.54	3	3128.56	-0.0203	92	120	0	82.11	35	2e-07	K	AQQEEIGDGANLTISFAGELLQNAEELIR	M
1	RBR1	NGSrhino	Q Exactive	151	yes	AT1G75990	Symbols: | PAM domain (PCI/PINT associated module) protein | chr1:28524623-28526718 REVERSE LENGTH=487	165	55557	4	4	8.8	487	1441	1	1	1	496.277	990.539	2	990.539	0.0004	321	329	0	55.66	35	9.4e-05	R	IGDLELFGK	I
1	RBR1	NGSrhino	Q Exactive	151	yes	AT1G75990	Symbols: | PAM domain (PCI/PINT associated module) protein | chr1:28524623-28526718 REVERSE LENGTH=487	165	55557	4	4	8.8	487	1809	1	0	0	520.311	1038.61	2	1038.61	0.001	289	297	0	41.45	29	0.00062	R	LLLGEIPER	S
1	RBR1	NGSrhino	Q Exactive	151	yes	AT1G75990	Symbols: | PAM domain (PCI/PINT associated module) protein | chr1:28524623-28526718 REVERSE LENGTH=487	165	55557	4	4	8.8	487	2986	1	0	0	591.306	1180.6	2	1180.6	-0.0005	250	259	0	48.38	36	0.00065	R	TIQLEYTDAK	E
1	RBR1	NGSrhino	Q Exactive	151	yes	AT1G75990	Symbols: | PAM domain (PCI/PINT associated module) protein | chr1:28524623-28526718 REVERSE LENGTH=487	165	55557	4	4	8.8	487	7283	1	0	0	588.662	1762.96	3	1762.96	0.0066	195	209	0	102.43	32	9.2e-10	R	HDELGQETLLNLLLR	N
1	RBR1	NGSrhino	Q Exactive	152	no	AT3G01600	Symbols: anac044, NAC044 | NAC domain containing protein 44 | chr3:229365-231105 FORWARD LENGTH=370	164	40801	3	3	11.4	370	4396	1	1	1	677.374	1352.73	2	1352.73	0.0025	138	149	0	50.86	33	0.00018	K	ITPTLVNDEPVR	W
1	RBR1	NGSrhino	Q Exactive	152	no	AT3G01600	Symbols: anac044, NAC044 | NAC domain containing protein 44 | chr3:229365-231105 FORWARD LENGTH=370	164	40801	3	3	11.4	370	5906	1	1	1	766.845	1531.67	2	1531.67	-0.0003	218	232	0	82.58	33	1.2e-07	K	LGENPDEGESSSGVR	G
1	RBR1	NGSrhino	Q Exactive	152	no	AT3G01600	Symbols: anac044, NAC044 | NAC domain containing protein 44 | chr3:229365-231105 FORWARD LENGTH=370	164	40801	3	3	11.4	370	7442	1	1	1	898.441	1794.87	2	1794.86	0.0104	61	75	0	83.05	36	2.4e-07	K	FEPTDEDIIEFLEAK	C
1	RBR1	NGSrhino	Q Exactive	153	yes	AT3G14990	Symbols: | Class I glutamine amidotransferase-like superfamily protein | chr3:5047510-5049621 FORWARD LENGTH=392	164	41831	3	3	11.7	392	1920	1	1	1	527.782	1053.55	2	1053.55	0.0035	331	340	0	67.22	34	5.5e-06	K	ATTHPVVSDK	L
1	RBR1	NGSrhino	Q Exactive	153	yes	AT3G14990	Symbols: | Class I glutamine amidotransferase-like superfamily protein | chr3:5047510-5049621 FORWARD LENGTH=392	164	41831	3	3	11.7	392	4955	1	1	1	714.404	1426.79	2	1426.79	0.0018	260	272	0	80.59	33	1.8e-07	K	LVAEVLLDEVAEK	S
1	RBR1	NGSrhino	Q Exactive	153	yes	AT3G14990	Symbols: | Class I glutamine amidotransferase-like superfamily protein | chr3:5047510-5049621 FORWARD LENGTH=392	164	41831	3	3	11.7	392	11022	1	1	1	815.473	2443.4	3	2443.39	0.009	7	29	0	73.91	25	1.5e-07	K	TVLIPIAHGTEPLEAVAMITVLR	R
1	RBR1	NGSrhino	Q Exactive	154	yes	AT4G27640	Symbols: | ARM repeat superfamily protein | chr4:13798013-13802976 REVERSE LENGTH=1048	163	115159	2	2	2.8	1048	4734	1	1	1	698.931	1395.85	2	1395.84	0.0018	376	388	0	94.34	24	1.2e-09	K	LDTVLNIVLGALR	D
1	RBR1	NGSrhino	Q Exactive	154	yes	AT4G27640	Symbols: | ARM repeat superfamily protein | chr4:13798013-13802976 REVERSE LENGTH=1048	163	115159	2	2	2.8	1048	7396	1	1	1	895.024	1788.03	2	1788.03	0.0051	760	775	0	93.91	26	1.9e-09	K	YLSPLVDATLLLLTEK	A
1	RBR1	NGSrhino	Q Exactive	155	yes	AT2G07360	Symbols: | SH3 domain-containing protein | chr2:3047623-3057099 REVERSE LENGTH=1196	161	129997	3	3	3.5	1196	4125	1	1	1	657.377	1312.74	2	1312.74	0.0007	649	659	0	81.45	32	1.4e-07	K	IDADVLQLLWK	T
1	RBR1	NGSrhino	Q Exactive	155	yes	AT2G07360	Symbols: | SH3 domain-containing protein | chr2:3047623-3057099 REVERSE LENGTH=1196	161	129997	3	3	3.5	1196	4214	1	1	1	662.383	1322.75	2	1322.75	0.0024	249	259	0	58.6	30	1.6e-05	K	LYEIVFGILEK	V
1	RBR1	NGSrhino	Q Exactive	155	yes	AT2G07360	Symbols: | SH3 domain-containing protein | chr2:3047623-3057099 REVERSE LENGTH=1196	161	129997	3	3	3.5	1196	9618	1	1	1	712.716	2135.13	3	2134.12	1.0048	348	367	0	73.91	34	1e-06	K	LASPTGALQDILHMNDVLAR	V
1	RBR1	NGSrhino	Q Exactive	156	yes	AT2G41800	Symbols: | Protein of unknown function, DUF642 | chr2:17436671-17438005 REVERSE LENGTH=370	161	40345	4	4	17.6	370	4741	1	1	1	466.897	1397.67	3	1397.67	-0.0009	165	176	0	59.97	36	4.2e-05	K	VTFHNPGVQEDR	T
1	RBR1	NGSrhino	Q Exactive	156	yes	AT2G41800	Symbols: | Protein of unknown function, DUF642 | chr2:17436671-17438005 REVERSE LENGTH=370	161	40345	4	4	17.6	370	4864	1	1	1	708.386	1414.76	2	1414.76	-0.0002	254	267	0	83.68	35	1.5e-07	K	VPYGQGAVELVAGR	E
1	RBR1	NGSrhino	Q Exactive	156	yes	AT2G41800	Symbols: | Protein of unknown function, DUF642 | chr2:17436671-17438005 REVERSE LENGTH=370	161	40345	4	4	17.6	370	9336	1	1	1	692.711	2075.11	3	2074.11	1.0026	27	45	0	38.95	33	0.0027	R	VPHLDGILPNGNFEITPLK	S	Deamidated (NQ)	0.0000000002000000000.0
1	RBR1	NGSrhino	Q Exactive	156	yes	AT2G41800	Symbols: | Protein of unknown function, DUF642 | chr2:17436671-17438005 REVERSE LENGTH=370	161	40345	4	4	17.6	370	10316	1	1	1	756.097	2265.27	3	2265.28	-0.0078	226	245	1	55.94	28	1.6e-05	R	IQDFISPLPGWIVESLKPVK	Y
1	RBR1	NGSrhino	Q Exactive	157	yes	AT1G80270	Symbols: PPR596 | PENTATRICOPEPTIDE REPEAT 596 | chr1:30181265-30183331 FORWARD LENGTH=596	161	67240	4	4	8.6	596	231	1	1	1	416.72	831.425	2	831.424	0.0007	342	349	0	49.37	37	0.00065	R	HYSGAGLK	D
1	RBR1	NGSrhino	Q Exactive	157	yes	AT1G80270	Symbols: PPR596 | PENTATRICOPEPTIDE REPEAT 596 | chr1:30181265-30183331 FORWARD LENGTH=596	161	67240	4	4	8.6	596	3415	1	1	1	616.8	1231.58	2	1231.58	0.0015	151	160	0	53.17	36	0.0002	K	WVEEGNEITR	V
1	RBR1	NGSrhino	Q Exactive	157	yes	AT1G80270	Symbols: PPR596 | PENTATRICOPEPTIDE REPEAT 596 | chr1:30181265-30183331 FORWARD LENGTH=596	161	67240	4	4	8.6	596	5880	1	1	1	764.934	1527.85	2	1527.85	0.0021	135	150	0	66.67	32	3.7e-06	K	TIVSAPGLSIGSALDK	W
1	RBR1	NGSrhino	Q Exactive	157	yes	AT1G80270	Symbols: PPR596 | PENTATRICOPEPTIDE REPEAT 596 | chr1:30181265-30183331 FORWARD LENGTH=596	161	67240	4	4	8.6	596	7773	1	1	1	919.439	1836.86	2	1836.86	0.0032	309	325	0	81.06	36	3.5e-07	K	GATNDISGMEQILETMK	D
1	RBR1	NGSrhino	Q Exactive	158	yes	AT3G02530	Symbols: | TCP-1/cpn60 chaperonin family protein | chr3:528806-532457 REVERSE LENGTH=535	158	58913	5	5	15.1	535	3008	1	1	1	592.322	1182.63	2	1182.63	0.0014	128	137	0	45.34	34	0.00078	R	ATLQFLDTFK	T
1	RBR1	NGSrhino	Q Exactive	158	yes	AT3G02530	Symbols: | TCP-1/cpn60 chaperonin family protein | chr3:528806-532457 REVERSE LENGTH=535	158	58913	5	5	15.1	535	3089	1	1	0	597.319	1192.62	2	1192.62	0.0044	381	391	0	39.61	36	0.0044	K	GPNDHTIAQIK	D
1	RBR1	NGSrhino	Q Exactive	158	yes	AT3G02530	Symbols: | TCP-1/cpn60 chaperonin family protein | chr3:528806-532457 REVERSE LENGTH=535	158	58913	5	5	15.1	535	3743	1	1	0	633.856	1265.7	2	1265.7	0.0003	299	310	0	57.24	33	4e-05	K	GIDPPSLDLLAR	E
1	RBR1	NGSrhino	Q Exactive	158	yes	AT3G02530	Symbols: | TCP-1/cpn60 chaperonin family protein | chr3:528806-532457 REVERSE LENGTH=535	158	58913	5	5	15.1	535	4015	1	1	0	647.86	1293.7	2	1293.7	0.0007	209	220	0	83.92	34	1.1e-07	R	LVEGLVLDHGSR	H
1	RBR1	NGSrhino	Q Exactive	159	no	AT3G21430	Symbols: ATALY3, ALY3 | DNA binding | chr3:7544800-7552841 REVERSE LENGTH=1132	158	127490	8	8	6.7	1132	101	1	1	1	407.233	812.452	2	812.45	0.0011	696	702	0	40.4	31	0.0014	R	PLNVSQR	V
1	RBR1	NGSrhino	Q Exactive	159	no	AT3G21430	Symbols: ATALY3, ALY3 | DNA binding | chr3:7544800-7552841 REVERSE LENGTH=1132	158	127490	8	8	6.7	1132	430	1	1	1	429.746	857.477	2	857.476	0.0007	640	646	0	43.51	35	0.0016	R	VEWGVIR	S
1	RBR1	NGSrhino	Q Exactive	159	no	AT3G21430	Symbols: ATALY3, ALY3 | DNA binding | chr3:7544800-7552841 REVERSE LENGTH=1132	158	127490	8	8	6.7	1132	739	1	1	1	449.738	897.461	2	897.46	0.0015	655	661	0	45.24	33	0.00071	R	FSEQFLK	E
1	RBR1	NGSrhino	Q Exactive	159	no	AT3G21430	Symbols: ATALY3, ALY3 | DNA binding | chr3:7544800-7552841 REVERSE LENGTH=1132	158	127490	8	8	6.7	1132	2147	1	1	1	543.759	1085.5	2	1085.5	0.0009	418	427	0	59.14	33	2.9e-05	K	AGEAYVSDFK	G
1	RBR1	NGSrhino	Q Exactive	159	no	AT3G21430	Symbols: ATALY3, ALY3 | DNA binding | chr3:7544800-7552841 REVERSE LENGTH=1132	158	127490	8	8	6.7	1132	3027	1	1	1	593.779	1185.54	2	1185.54	-0.0016	273	282	0	36.83	33	0.0052	K	LHATDMEDVR	C
1	RBR1	NGSrhino	Q Exactive	159	no	AT3G21430	Symbols: ATALY3, ALY3 | DNA binding | chr3:7544800-7552841 REVERSE LENGTH=1132	158	127490	8	8	6.7	1132	3175	1	1	1	602.821	1203.63	2	1203.62	0.0025	503	513	1	44.68	37	0.0019	K	GIGEEYKPVGR	G
1	RBR1	NGSrhino	Q Exactive	159	no	AT3G21430	Symbols: ATALY3, ALY3 | DNA binding | chr3:7544800-7552841 REVERSE LENGTH=1132	158	127490	8	8	6.7	1132	3435	1	1	1	618.276	1234.54	2	1234.54	-0.0023	677	686	0	35.82	33	0.0062	K	HYDELNTGMR	E
1	RBR1	NGSrhino	Q Exactive	159	no	AT3G21430	Symbols: ATALY3, ALY3 | DNA binding | chr3:7544800-7552841 REVERSE LENGTH=1132	158	127490	8	8	6.7	1132	6464	1	1	1	817.926	1633.84	2	1633.84	0.0017	728	741	0	52.27	36	0.00026	R	IQFDNPELGVEFVK	D
1	RBR1	NGSrhino	Q Exactive	160	yes	AT3G10380	Symbols: SEC8, ATSEC8 | subunit of exocyst complex 8 | chr3:3219922-3228356 REVERSE LENGTH=1053	155	116533	3	3	5.2	1053	4433	1	1	1	679.892	1357.77	2	1357.77	-0.0003	448	459	0	57.14	32	3.5e-05	K	ELLDSILDTIVK	I
1	RBR1	NGSrhino	Q Exactive	160	yes	AT3G10380	Symbols: SEC8, ATSEC8 | subunit of exocyst complex 8 | chr3:3219922-3228356 REVERSE LENGTH=1053	155	116533	3	3	5.2	1053	10058	1	1	1	736.396	2206.16	3	2206.17	-0.0084	815	834	0	81.59	34	1.8e-07	K	LILLASLSDSLEYVADSIER	L
1	RBR1	NGSrhino	Q Exactive	160	yes	AT3G10380	Symbols: SEC8, ATSEC8 | subunit of exocyst complex 8 | chr3:3219922-3228356 REVERSE LENGTH=1053	155	116533	3	3	5.2	1053	11549	1	1	1	647.308	2585.2	4	2585.2	0.0009	56	78	0	63.92	36	1.7e-05	K	EQSDVVEEVVDEVVHAYHGGFNK	A
1	RBR1	NGSrhino	Q Exactive	161	yes	AT2G05830	Symbols: | NagB/RpiA/CoA transferase-like superfamily protein | chr2:2229759-2231839 FORWARD LENGTH=374	155	39588	3	2	10.7	374	3011	1	1	1	592.338	1182.66	2	1182.66	0.0003	98	109	0	53.44	32	8.7e-05	R	PTAVNLADAALK	L
1	RBR1	NGSrhino	Q Exactive	161	yes	AT2G05830	Symbols: | NagB/RpiA/CoA transferase-like superfamily protein | chr2:2229759-2231839 FORWARD LENGTH=374	155	39588	3	2	10.7	374	12515	1	1	1	975.85	2924.53	3	2924.54	-0.0075	321	348	0	79.16	32	2.2e-07	R	IAAPGISVWNPAFDMTPAELIAGIITEK	G
1	RBR1	NGSrhino	Q Exactive	162	yes	AT3G56340	Symbols: | Ribosomal protein S26e family protein | chr3:20892309-20893343 REVERSE LENGTH=130	153	14619	5	5	38.5	130	64	1	1	1	403.753	805.492	2	805.492	0	16	22	1	33.01	27	0.0027	R	GHVKPIR	C
1	RBR1	NGSrhino	Q Exactive	162	yes	AT3G56340	Symbols: | Ribosomal protein S26e family protein | chr3:20892309-20893343 REVERSE LENGTH=130	153	14619	5	5	38.5	130	479	1	1	1	432.738	863.462	2	863.461	0.0011	120	129	0	68.24	35	5.4e-06	R	PAGGAPAAPR	A
1	RBR1	NGSrhino	Q Exactive	162	yes	AT3G56340	Symbols: | Ribosomal protein S26e family protein | chr3:20892309-20893343 REVERSE LENGTH=130	153	14619	5	5	38.5	130	929	1	1	1	461.248	920.482	2	920.483	-0.0004	111	119	0	45.48	36	0.0013	K	PAQPGQAPR	P
1	RBR1	NGSrhino	Q Exactive	162	yes	AT3G56340	Symbols: | Ribosomal protein S26e family protein | chr3:20892309-20893343 REVERSE LENGTH=130	153	14619	5	5	38.5	130	1611	1	1	1	507.291	1012.57	2	1012.57	0.0011	43	51	0	58.07	32	2.8e-05	R	NIVEQAAIR	D
1	RBR1	NGSrhino	Q Exactive	162	yes	AT3G56340	Symbols: | Ribosomal protein S26e family protein | chr3:20892309-20893343 REVERSE LENGTH=130	153	14619	5	5	38.5	130	6945	1	1	1	850.416	1698.82	2	1697.81	1.0031	52	66	0	50.91	36	0.00034	R	DVQEASVYEGYTLPK	L
1	RBR1	NGSrhino	Q Exactive	163	no	AT3G54650	Symbols: FBL17 | RNI-like superfamily protein | chr3:20226004-20228882 REVERSE LENGTH=593	153	64727	4	4	7.3	593	578	1	1	1	438.726	875.437	2	875.435	0.0019	240	247	0	63.46	38	2.9e-05	R	ISGDELSR	F
1	RBR1	NGSrhino	Q Exactive	163	no	AT3G54650	Symbols: FBL17 | RNI-like superfamily protein | chr3:20226004-20228882 REVERSE LENGTH=593	153	64727	4	4	7.3	593	2385	1	1	1	554.769	1107.52	2	1107.52	0.0035	97	106	0	40.43	36	0.0042	R	ALSFDDVDAR	N
1	RBR1	NGSrhino	Q Exactive	163	no	AT3G54650	Symbols: FBL17 | RNI-like superfamily protein | chr3:20226004-20228882 REVERSE LENGTH=593	153	64727	4	4	7.3	593	3971	1	1	1	645.358	1288.7	2	1288.7	0.0023	76	88	0	61.81	35	2.4e-05	R	STVLSLTAAPSSR	Q
1	RBR1	NGSrhino	Q Exactive	163	no	AT3G54650	Symbols: FBL17 | RNI-like superfamily protein | chr3:20226004-20228882 REVERSE LENGTH=593	153	64727	4	4	7.3	593	3984	1	1	1	645.876	1289.74	2	1289.73	0.0036	184	195	0	68.54	31	1.8e-06	R	AQIGYIGSLLQK	C
1	RBR1	NGSrhino	Q Exactive	164	yes	AT3G49870	Symbols: ATARLA1C, ARLA1C | ADP-ribosylation factor-like A1C | chr3:18492674-18494021 REVERSE LENGTH=184	149	20390	5	5	36.4	184	969	1	1	1	464.777	927.539	2	927.539	-0.0003	131	139	1	36.22	32	0.0043	K	IDKPGALSK	E
1	RBR1	NGSrhino	Q Exactive	164	yes	AT3G49870	Symbols: ATARLA1C, ARLA1C | ADP-ribosylation factor-like A1C | chr3:18492674-18494021 REVERSE LENGTH=184	149	20390	5	5	36.4	184	1824	1	1	1	521.278	1040.54	2	1040.54	0.0002	68	76	0	37.81	34	0.005	K	LWDLGGQPR	F
1	RBR1	NGSrhino	Q Exactive	164	yes	AT3G49870	Symbols: ATARLA1C, ARLA1C | ADP-ribosylation factor-like A1C | chr3:18492674-18494021 REVERSE LENGTH=184	149	20390	5	5	36.4	184	5034	1	1	1	720.429	1438.84	2	1438.84	0.0038	117	130	0	57.85	28	1.2e-05	K	TSLNGIPLLVLGNK	I	Deamidated (NQ)	0.00020000000000.0
1	RBR1	NGSrhino	Q Exactive	164	yes	AT3G49870	Symbols: ATARLA1C, ARLA1C | ADP-ribosylation factor-like A1C | chr3:18492674-18494021 REVERSE LENGTH=184	149	20390	5	5	36.4	184	6622	1	1	1	822.932	1643.85	2	1643.85	-0.0027	165	178	0	70.13	35	3.8e-06	K	NSTNIDQVIDWLVK	H
1	RBR1	NGSrhino	Q Exactive	164	yes	AT3G49870	Symbols: ATARLA1C, ARLA1C | ADP-ribosylation factor-like A1C | chr3:18492674-18494021 REVERSE LENGTH=184	149	20390	5	5	36.4	184	9606	1	1	1	712.043	2133.11	3	2132.1	1.008	87	107	0	41.56	34	0.0021	R	AVSAIVYVVDAADPDNLSVSK	S
1	RBR1	NGSrhino	Q Exactive	165	yes	AT5G62740	Symbols: HIR1, ATHIR1 | SPFH/Band 7/PHB domain-containing membrane-associated protein family | chr5:25201320-25202535 FORWARD LENGTH=286	149	31411	3	2	9.1	286	3305	1	1	1	610.332	1218.65	2	1218.65	0.0004	112	121	0	68.14	36	6.6e-06	K	LLLDDVFEQK	N
1	RBR1	NGSrhino	Q Exactive	165	yes	AT5G62740	Symbols: HIR1, ATHIR1 | SPFH/Band 7/PHB domain-containing membrane-associated protein family | chr5:25201320-25202535 FORWARD LENGTH=286	149	31411	3	2	9.1	286	8323	1	1	1	968.447	1934.88	2	1934.88	-0.0035	232	247	0	74.8	35	1.2e-06	K	DVMDMVLVTQYFDTMK	E
1	RBR1	NGSrhino	Q Exactive	166	yes	AT3G22890	Symbols: APS1 | ATP sulfurylase 1 | chr3:8112837-8114734 FORWARD LENGTH=463	147	51427	3	3	9.1	463	2041	1	0	0	536.795	1071.58	2	1071.57	0.0005	373	382	0	44.66	35	0.0011	K	VLSMAPGLER	L
1	RBR1	NGSrhino	Q Exactive	166	yes	AT3G22890	Symbols: APS1 | ATP sulfurylase 1 | chr3:8112837-8114734 FORWARD LENGTH=463	147	51427	3	3	9.1	463	2626	1	1	1	569.27	1136.53	2	1136.53	-0.0028	351	361	0	50.16	36	0.0004	R	DPAGMGHPVEK	R
1	RBR1	NGSrhino	Q Exactive	166	yes	AT3G22890	Symbols: APS1 | ATP sulfurylase 1 | chr3:8112837-8114734 FORWARD LENGTH=463	147	51427	3	3	9.1	463	10342	1	1	1	1139.6	2277.19	2	2277.19	0.0034	152	172	0	103.28	34	1.2e-09	R	VALFNSDGNPVAILSDIEIYK	H
1	RBR1	NGSrhino	Q Exactive	167	yes	AT5G16300	Symbols: | Vps51/Vps67 family (components of vesicular transport) protein | chr5:5338119-5342186 FORWARD LENGTH=1068	147	118728	3	3	3.7	1068	2651	1	1	1	570.362	1138.71	2	1138.71	0.0012	831	840	0	65.4	24	8.2e-07	K	GVLQILLDLR	F
1	RBR1	NGSrhino	Q Exactive	167	yes	AT5G16300	Symbols: | Vps51/Vps67 family (components of vesicular transport) protein | chr5:5338119-5342186 FORWARD LENGTH=1068	147	118728	3	3	3.7	1068	4865	1	1	1	708.399	1414.78	2	1414.78	0.0006	718	729	0	83.26	33	1.2e-07	K	WLSDELSAILLR	D
1	RBR1	NGSrhino	Q Exactive	167	yes	AT5G16300	Symbols: | Vps51/Vps67 family (components of vesicular transport) protein | chr5:5338119-5342186 FORWARD LENGTH=1068	147	118728	3	3	3.7	1068	10630	1	1	1	1162.56	2323.11	2	2323.1	0.007	895	912	0	51.41	36	0.00033	K	LDPIDWLTYEPYLWENEK	Q
1	RBR1	NGSrhino	Q Exactive	168	yes	AT1G24300	Symbols: | GYF domain-containing protein | chr1:8614515-8620420 REVERSE LENGTH=1495	147	166168	5	5	2.9	1495	120	1	1	1	408.732	815.449	2	815.45	-0.0006	98	105	0	46.66	35	0.00075	R	ETGLLGAR	K
1	RBR1	NGSrhino	Q Exactive	168	yes	AT1G24300	Symbols: | GYF domain-containing protein | chr1:8614515-8620420 REVERSE LENGTH=1495	147	166168	5	5	2.9	1495	1610	1	1	1	507.29	1012.57	2	1012.57	-0.0008	795	802	0	50.18	32	0.00019	K	IQLQQQQK	I
1	RBR1	NGSrhino	Q Exactive	168	yes	AT1G24300	Symbols: | GYF domain-containing protein | chr1:8614515-8620420 REVERSE LENGTH=1495	147	166168	5	5	2.9	1495	1971	1	1	1	531.265	1060.51	2	1060.51	-0.0002	82	90	0	70.25	36	4.7e-06	K	IVSENETNR	R
1	RBR1	NGSrhino	Q Exactive	168	yes	AT1G24300	Symbols: | GYF domain-containing protein | chr1:8614515-8620420 REVERSE LENGTH=1495	147	166168	5	5	2.9	1495	2643	1	1	1	570.294	1138.57	2	1138.57	0.0014	973	981	0	62.21	35	2.3e-05	R	HNTLLEEQR	H
1	RBR1	NGSrhino	Q Exactive	168	yes	AT1G24300	Symbols: | GYF domain-containing protein | chr1:8614515-8620420 REVERSE LENGTH=1495	147	166168	5	5	2.9	1495	2919	1	1	1	587.34	1172.66	2	1172.67	-0.0005	922	931	0	52.81	34	0.00015	R	ELLEQLLSTK	M
1	RBR1	NGSrhino	Q Exactive	169	yes	AT2G36250	Symbols: FTSZ2-1, ATFTSZ2-1 | Tubulin/FtsZ family protein | chr2:15197661-15199932 REVERSE LENGTH=478	146	50690	3	3	9.2	478	2565	1	1	1	565.792	1129.57	2	1129.57	-0.0026	85	95	0	56.4	36	9.6e-05	R	GEGTSTIVNPR	K
1	RBR1	NGSrhino	Q Exactive	169	yes	AT2G36250	Symbols: FTSZ2-1, ATFTSZ2-1 | Tubulin/FtsZ family protein | chr2:15197661-15199932 REVERSE LENGTH=478	146	50690	3	3	9.2	478	5210	1	1	1	728.391	1454.77	2	1454.76	0.005	265	277	0	72.62	35	1.8e-06	R	DNVDTLIVIPNDK	L
1	RBR1	NGSrhino	Q Exactive	169	yes	AT2G36250	Symbols: FTSZ2-1, ATFTSZ2-1 | Tubulin/FtsZ family protein | chr2:15197661-15199932 REVERSE LENGTH=478	146	50690	3	3	9.2	478	9509	1	1	1	705.389	2113.14	3	2113.14	0.0025	305	324	0	67.23	33	3.8e-06	R	GISDIITIPGLVNVDFADVR	A
1	RBR1	NGSrhino	Q Exactive	170	yes	AT4G34450	Symbols: | coatomer gamma-2 subunit, putative / gamma-2 coat protein, putative / gamma-2 COP, putative | chr4:16471956-16476795 FORWARD LENGTH=886	144	98429	4	4	6.1	886	3143	1	1	1	600.372	1198.73	2	1198.73	0.0019	421	431	0	62.71	28	3.6e-06	R	AIVDSIVTIIR	D
1	RBR1	NGSrhino	Q Exactive	170	yes	AT4G34450	Symbols: | coatomer gamma-2 subunit, putative / gamma-2 coat protein, putative / gamma-2 COP, putative | chr4:16471956-16476795 FORWARD LENGTH=886	144	98429	4	4	6.1	886	4410	1	1	1	678.855	1355.7	2	1355.7	-0.0016	66	77	0	51.31	35	0.00027	K	VEATEVFFSVTK	L
1	RBR1	NGSrhino	Q Exactive	170	yes	AT4G34450	Symbols: | coatomer gamma-2 subunit, putative / gamma-2 coat protein, putative / gamma-2 COP, putative | chr4:16471956-16476795 FORWARD LENGTH=886	144	98429	4	4	6.1	886	4515	1	1	1	686.397	1370.78	2	1370.78	0.003	133	144	0	67.15	32	3.3e-06	R	IIDGTLLTQIER	Y
1	RBR1	NGSrhino	Q Exactive	170	yes	AT4G34450	Symbols: | coatomer gamma-2 subunit, putative / gamma-2 coat protein, putative / gamma-2 COP, putative | chr4:16471956-16476795 FORWARD LENGTH=886	144	98429	4	4	6.1	886	9631	1	1	1	1070.05	2138.09	2	2138.1	-0.0067	554	572	0	37.46	35	0.0057	K	DFLFGSLEVPLVNMETSLK	N
1	RBR1	NGSrhino	Q Exactive	171	yes	AT5G02960	Symbols: | Ribosomal protein S12/S23 family protein | chr5:693280-694396 REVERSE LENGTH=142	144	15726	4	4	28.2	142	1274	1	1	1	485.741	969.467	2	969.467	-0.0002	30	37	0	35.22	34	0.008	K	SHLGNEWK	K
1	RBR1	NGSrhino	Q Exactive	171	yes	AT5G02960	Symbols: | Ribosomal protein S12/S23 family protein | chr5:693280-694396 REVERSE LENGTH=142	144	15726	4	4	28.2	142	1732	1	1	1	515.278	1028.54	2	1028.54	0.0004	38	47	1	72.35	35	2.1e-06	K	KPFAGSSHAK	G
1	RBR1	NGSrhino	Q Exactive	171	yes	AT5G02960	Symbols: | Ribosomal protein S12/S23 family protein | chr5:693280-694396 REVERSE LENGTH=142	144	15726	4	4	28.2	142	2082	1	1	1	539.294	1076.57	2	1076.57	-0.0001	108	118	0	44.14	36	0.0016	K	GHAVGDIPGVR	F
1	RBR1	NGSrhino	Q Exactive	171	yes	AT5G02960	Symbols: | Ribosomal protein S12/S23 family protein | chr5:693280-694396 REVERSE LENGTH=142	144	15726	4	4	28.2	142	2590	1	1	1	567.35	1132.69	2	1132.69	0.0004	124	134	0	69.64	26	4.7e-07	K	VSGVSLLALFK	E
1	RBR1	NGSrhino	Q Exactive	172	yes	AT2G38770	Symbols: EMB2765 | P-loop containing nucleoside triphosphate hydrolases superfamily protein | chr2:16203185-16210253 REVERSE LENGTH=1509	143	172913	2	2	1.8	1509	5615	1	1	1	750.383	1498.75	2	1498.76	-0.005	446	458	0	72.09	35	2.4e-06	K	DFLTEVVVSSFEK	Q
1	RBR1	NGSrhino	Q Exactive	172	yes	AT2G38770	Symbols: EMB2765 | P-loop containing nucleoside triphosphate hydrolases superfamily protein | chr2:16203185-16210253 REVERSE LENGTH=1509	143	172913	2	2	1.8	1509	7087	1	1	1	863.975	1725.93	2	1725.93	0.0009	344	357	0	95.9	33	5.1e-09	K	LFAQLVDLLQFYEK	F
1	RBR1	NGSrhino	Q Exactive	173	yes	AT3G25520	Symbols: ATL5, PGY3, OLI5, RPL5A | ribosomal protein L5 | chr3:9269573-9271327 REVERSE LENGTH=301	143	34337	3	2	8.6	301	1271	1	1	1	485.309	968.603	2	968.602	0.0013	143	151	0	67.86	25	6e-07	R	ALLDVGLIR	T
1	RBR1	NGSrhino	Q Exactive	173	yes	AT3G25520	Symbols: ATL5, PGY3, OLI5, RPL5A | ribosomal protein L5 | chr3:9269573-9271327 REVERSE LENGTH=301	143	34337	3	2	8.6	301	6940	1	1	1	849.986	1697.96	2	1697.96	0.0003	59	75	0	69.23	29	1.1e-06	K	DIVAQIVSASIAGDIVK	A
1	RBR1	NGSrhino	Q Exactive	174	yes	AT3G62530	Symbols: | ARM repeat superfamily protein | chr3:23132219-23133121 FORWARD LENGTH=221	141	24488	3	3	18.6	221	2576	1	1	1	566.777	1131.54	2	1131.54	-0.0007	65	76	0	38.37	35	0.0057	R	GAIDSSAPAESK	A
1	RBR1	NGSrhino	Q Exactive	174	yes	AT3G62530	Symbols: | ARM repeat superfamily protein | chr3:23132219-23133121 FORWARD LENGTH=221	141	24488	3	3	18.6	221	4787	1	1	1	702.891	1403.77	2	1403.77	0.0006	136	148	0	81.67	34	1.9e-07	R	IEAAFVLGQLESK	T
1	RBR1	NGSrhino	Q Exactive	174	yes	AT3G62530	Symbols: | ARM repeat superfamily protein | chr3:23132219-23133121 FORWARD LENGTH=221	141	24488	3	3	18.6	221	7159	1	1	1	870.475	1738.93	2	1738.94	-0.0004	185	200	0	83.81	33	9.7e-08	R	EVLQELSGDLDPIIAK	G
1	RBR1	NGSrhino	Q Exactive	175	yes	AT5G26860	Symbols: LON_ARA_ARA, LON1 | lon protease 1 | chr5:9451183-9456631 FORWARD LENGTH=940	140	103866	3	3	4.3	940	1651	1	1	1	509.31	1016.61	2	1016.6	0.0032	442	450	0	59.35	31	1.7e-05	R	ILEFIAVGR	L
1	RBR1	NGSrhino	Q Exactive	175	yes	AT5G26860	Symbols: LON_ARA_ARA, LON1 | lon protease 1 | chr5:9451183-9456631 FORWARD LENGTH=940	140	103866	3	3	4.3	940	6856	1	1	1	842.461	1682.91	2	1682.91	-0.0019	520	535	0	55.87	33	5.6e-05	K	SVGTANPLVLIDEIDK	L
1	RBR1	NGSrhino	Q Exactive	175	yes	AT5G26860	Symbols: LON_ARA_ARA, LON1 | lon protease 1 | chr5:9451183-9456631 FORWARD LENGTH=940	140	103866	3	3	4.3	940	7019	1	1	1	573.662	1717.96	3	1717.96	0.0032	371	385	0	75.88	30	3e-07	K	IPAHVLQVIEEELTK	L
1	RBR1	NGSrhino	Q Exactive	176	yes	AT3G02200	Symbols: | Proteasome component (PCI) domain protein | chr3:406692-408675 FORWARD LENGTH=364	139	41130	3	3	8.8	364	61	1	1	0	403.245	804.476	2	804.475	0.0012	226	232	0	47.98	33	0.00036	R	AVIEFVK	A
1	RBR1	NGSrhino	Q Exactive	176	yes	AT3G02200	Symbols: | Proteasome component (PCI) domain protein | chr3:406692-408675 FORWARD LENGTH=364	139	41130	3	3	8.8	364	3405	1	1	1	615.879	1229.74	2	1229.74	0.0044	178	188	0	59.25	27	6.7e-06	R	ELFLAIANVLK	E
1	RBR1	NGSrhino	Q Exactive	176	yes	AT3G02200	Symbols: | Proteasome component (PCI) domain protein | chr3:406692-408675 FORWARD LENGTH=364	139	41130	3	3	8.8	364	5115	1	1	1	723.886	1445.76	2	1445.76	-0.0029	301	314	0	85.54	36	1.2e-07	R	LLSLVDLASDESGK	I
1	RBR1	NGSrhino	Q Exactive	177	yes	AT3G20050	Symbols: ATTCP-1, TCP-1 | T-complex protein 1 alpha subunit | chr3:6998544-7002266 REVERSE LENGTH=545	138	59192	4	4	8.8	545	1929	1	1	1	528.765	1055.52	2	1055.51	0.0005	472	480	0	52.92	34	0.00016	R	AYHHTAQTK	A
1	RBR1	NGSrhino	Q Exactive	177	yes	AT3G20050	Symbols: ATTCP-1, TCP-1 | T-complex protein 1 alpha subunit | chr3:6998544-7002266 REVERSE LENGTH=545	138	59192	4	4	8.8	545	2422	1	1	1	557.822	1113.63	2	1113.63	0.0017	359	368	0	58.37	34	4.1e-05	R	IADDDVILIK	G
1	RBR1	NGSrhino	Q Exactive	177	yes	AT3G20050	Symbols: ATTCP-1, TCP-1 | T-complex protein 1 alpha subunit | chr3:6998544-7002266 REVERSE LENGTH=545	138	59192	4	4	8.8	545	3941	1	1	1	642.862	1283.71	2	1283.71	0.0003	77	87	0	46.82	33	0.00046	K	VLVELAELQDR	E
1	RBR1	NGSrhino	Q Exactive	177	yes	AT3G20050	Symbols: ATTCP-1, TCP-1 | T-complex protein 1 alpha subunit | chr3:6998544-7002266 REVERSE LENGTH=545	138	59192	4	4	8.8	545	7547	1	1	1	901.002	1799.99	2	1799.99	0.0021	88	105	0	74.08	32	6.5e-07	R	EVGDGTTSVVIVAAELLK	R
1	RBR1	NGSrhino	Q Exactive	178	yes	AT1G53750	Symbols: RPT1A | regulatory particle triple-A 1A | chr1:20065921-20068324 REVERSE LENGTH=426	137	47773	7	7	17.6	426	250	1	1	1	417.74	833.466	2	833.465	0.0016	114	121	0	38.23	35	0.005	K	FVVGLGDK	V
1	RBR1	NGSrhino	Q Exactive	178	yes	AT1G53750	Symbols: RPT1A | regulatory particle triple-A 1A | chr1:20065921-20068324 REVERSE LENGTH=426	137	47773	7	7	17.6	426	711	1	1	1	447.73	893.445	2	893.443	0.0019	252	258	0	36.08	35	0.0093	R	ELFQMAR	S
1	RBR1	NGSrhino	Q Exactive	178	yes	AT1G53750	Symbols: RPT1A | regulatory particle triple-A 1A | chr1:20065921-20068324 REVERSE LENGTH=426	137	47773	7	7	17.6	426	927	1	1	1	461.238	920.462	2	920.46	0.0016	401	408	0	42.65	37	0.0028	K	DFLDAVNK	V
1	RBR1	NGSrhino	Q Exactive	178	yes	AT1G53750	Symbols: RPT1A | regulatory particle triple-A 1A | chr1:20065921-20068324 REVERSE LENGTH=426	137	47773	7	7	17.6	426	2151	1	1	1	544.285	1086.55	2	1086.56	-0.001	94	103	0	48.92	35	0.00042	K	IISPNTEDAK	Y
1	RBR1	NGSrhino	Q Exactive	178	yes	AT1G53750	Symbols: RPT1A | regulatory particle triple-A 1A | chr1:20065921-20068324 REVERSE LENGTH=426	137	47773	7	7	17.6	426	3524	1	1	1	621.335	1240.66	2	1240.66	0.0004	17	27	0	77.35	34	5.2e-07	R	PLDEDDIALLK	T
1	RBR1	NGSrhino	Q Exactive	178	yes	AT1G53750	Symbols: RPT1A | regulatory particle triple-A 1A | chr1:20065921-20068324 REVERSE LENGTH=426	137	47773	7	7	17.6	426	8359	1	1	1	972.964	1943.91	2	1943.91	0.0017	60	77	0	42.16	36	0.0026	K	ESDTGLAPPSQWDLVSDK	Q
1	RBR1	NGSrhino	Q Exactive	179	yes	AT1G80070	Symbols: SUS2, EMB33, EMB177, EMB14 | Pre-mRNA-processing-splicing factor | chr1:30118052-30127574 FORWARD LENGTH=2359	137	275251	2	2	1.7	2359	9635	1	1	1	714.062	2139.16	3	2139.16	0.0068	1496	1515	0	121.26	31	1.1e-11	R	TDVIQALGGVEGILEHTLFK	G
1	RBR1	NGSrhino	Q Exactive	179	yes	AT1G80070	Symbols: SUS2, EMB33, EMB177, EMB14 | Pre-mRNA-processing-splicing factor | chr1:30118052-30127574 FORWARD LENGTH=2359	137	275251	2	2	1.7	2359	9844	1	1	1	721.732	2162.18	3	2162.18	-0.0055	1891	1909	0	39.85	31	0.0013	K	GMLDPLEVHLLDFPNIVIK	G
1	RBR1	NGSrhino	Q Exactive	180	yes	AT2G20450	Symbols: | Ribosomal protein L14 | chr2:8813923-8815071 FORWARD LENGTH=134	135	15497	2	2	17.9	134	4236	1	1	1	664.335	1326.66	2	1326.65	0.0098	12	23	0	54.9	36	0.00014	R	VALVNYGEDYGK	L
1	RBR1	NGSrhino	Q Exactive	180	yes	AT2G20450	Symbols: | Ribosomal protein L14 | chr2:8813923-8815071 FORWARD LENGTH=134	135	15497	2	2	17.9	134	4514	1	1	0	686.396	1370.78	2	1370.78	0.0011	53	64	0	107.21	32	3.4e-10	R	LSLTDIVIDINR	V
1	RBR1	NGSrhino	Q Exactive	181	yes	AT2G46280	Symbols: TRIP-1, TIF3I1 | TGF-beta receptor interacting protein 1 | chr2:19003656-19005393 REVERSE LENGTH=328	134	36365	4	4	14.3	328	2144	1	1	1	543.314	1084.61	2	1084.61	0.0012	278	287	0	40.09	33	0.0024	K	ILQEEIGGVK	G
1	RBR1	NGSrhino	Q Exactive	181	yes	AT2G46280	Symbols: TRIP-1, TIF3I1 | TGF-beta receptor interacting protein 1 | chr2:19003656-19005393 REVERSE LENGTH=328	134	36365	4	4	14.3	328	2361	1	1	1	552.798	1103.58	2	1103.58	-0.001	67	77	0	65.16	37	1.7e-05	R	LITGSADQTAK	L
1	RBR1	NGSrhino	Q Exactive	181	yes	AT2G46280	Symbols: TRIP-1, TIF3I1 | TGF-beta receptor interacting protein 1 | chr2:19003656-19005393 REVERSE LENGTH=328	134	36365	4	4	14.3	328	4638	1	1	1	693.874	1385.73	2	1385.73	0.0028	107	118	0	72.64	35	1.8e-06	R	LAVITTDHFVDR	T
1	RBR1	NGSrhino	Q Exactive	181	yes	AT2G46280	Symbols: TRIP-1, TIF3I1 | TGF-beta receptor interacting protein 1 | chr2:19003656-19005393 REVERSE LENGTH=328	134	36365	4	4	14.3	328	5364	1	1	1	492.906	1475.69	3	1475.69	0.0054	202	215	0	51.26	36	0.00033	K	AADDSHFLTGSLDK	T
1	RBR1	NGSrhino	Q Exactive	182	yes	AT3G05590	Symbols: RPL18 | ribosomal protein L18 | chr3:1621511-1622775 FORWARD LENGTH=187	133	20913	4	4	21.9	187	316	1	1	1	422.251	842.487	2	842.486	0.001	2	10	0	34.51	33	0.0082	M	GIDLIAGGK	S
1	RBR1	NGSrhino	Q Exactive	182	yes	AT3G05590	Symbols: RPL18 | ribosomal protein L18 | chr3:1621511-1622775 FORWARD LENGTH=187	133	20913	4	4	21.9	187	949	1	1	1	462.747	923.479	2	923.479	0.0006	67	74	0	43.55	35	0.0016	R	LVEFMTGK	E
1	RBR1	NGSrhino	Q Exactive	182	yes	AT3G05590	Symbols: RPL18 | ribosomal protein L18 | chr3:1621511-1622775 FORWARD LENGTH=187	133	20913	4	4	21.9	187	2988	1	1	1	591.355	1180.69	2	1180.69	0.0019	129	139	0	38.6	27	0.00086	R	APLGQNTVLLR	G
1	RBR1	NGSrhino	Q Exactive	182	yes	AT3G05590	Symbols: RPL18 | ribosomal protein L18 | chr3:1621511-1622775 FORWARD LENGTH=187	133	20913	4	4	21.9	187	4634	1	1	1	693.405	1384.8	2	1384.79	0.0029	78	90	0	101.18	31	1.1e-09	K	IAVLVGTITDDLR	V
1	RBR1	NGSrhino	Q Exactive	183	yes	AT5G19760	Symbols: | Mitochondrial substrate carrier family protein | chr5:6679591-6681845 REVERSE LENGTH=298	133	31891	2	2	8.1	298	4065	1	1	1	651.36	1300.71	2	1300.7	0.0028	157	168	0	95.25	35	1.1e-08	R	ISADEGVLALWK	G
1	RBR1	NGSrhino	Q Exactive	183	yes	AT5G19760	Symbols: | Mitochondrial substrate carrier family protein | chr5:6679591-6681845 REVERSE LENGTH=298	133	31891	2	2	8.1	298	4422	1	1	1	679.35	1356.68	2	1356.68	0.0029	133	144	0	72.82	35	2e-06	R	MQADNTLPLAQR	R
1	RBR1	NGSrhino	Q Exactive	184	yes	AT5G42950	Symbols: | GYF domain-containing protein | chr5:17224436-17231044 FORWARD LENGTH=1714	132	187504	2	2	1.8	1714	1908	1	1	1	527.275	1052.54	2	1052.54	0.0001	654	663	0	81.19	35	2.6e-07	K	HVAGTVAENR	F
1	RBR1	NGSrhino	Q Exactive	184	yes	AT5G42950	Symbols: | GYF domain-containing protein | chr5:17224436-17231044 FORWARD LENGTH=1714	132	187504	2	2	1.8	1714	10193	1	1	1	746.388	2236.14	3	2236.13	0.0121	584	604	0	74.92	35	1.1e-06	R	LASAPNDSPFSLLGDVMPHLR	A
1	RBR1	NGSrhino	Q Exactive	185	yes	AT1G69840	Symbols: | SPFH/Band 7/PHB domain-containing membrane-associated protein family | chr1:26293932-26295150 REVERSE LENGTH=286	130	31386	4	4	19.6	286	2069	1	1	1	538.762	1075.51	2	1075.51	0.0019	160	169	0	36.29	36	0.0098	R	AMNEINAASR	M
1	RBR1	NGSrhino	Q Exactive	185	yes	AT1G69840	Symbols: | SPFH/Band 7/PHB domain-containing membrane-associated protein family | chr1:26293932-26295150 REVERSE LENGTH=286	130	31386	4	4	19.6	286	3099	1	1	1	598.295	1194.57	2	1194.58	-0.0022	112	121	0	56.59	36	0.00011	K	LDLDSTFEQK	N
1	RBR1	NGSrhino	Q Exactive	185	yes	AT1G69840	Symbols: | SPFH/Band 7/PHB domain-containing membrane-associated protein family | chr1:26293932-26295150 REVERSE LENGTH=286	130	31386	4	4	19.6	286	4123	1	1	1	657.322	1312.63	2	1312.63	-0.0004	78	89	0	52.61	35	0.0002	R	ALAESAQDAFYK	L
1	RBR1	NGSrhino	Q Exactive	185	yes	AT1G69840	Symbols: | SPFH/Band 7/PHB domain-containing membrane-associated protein family | chr1:26293932-26295150 REVERSE LENGTH=286	130	31386	4	4	19.6	286	11987	1	1	1	689.857	2755.4	4	2755.39	0.0118	135	158	0	67.47	35	5.7e-06	K	AMSHYGYEIVQTLIVDIEPDVHVK	R
1	RBR1	NGSrhino	Q Exactive	186	yes	AT2G07698	Symbols: | ATPase, F1 complex, alpha subunit protein | chr2:3361474-3364028 FORWARD LENGTH=777	130	85879	3	3	4.1	777	1601	1	1	1	506.744	1011.47	2	1011.47	0.0008	391	399	0	63.69	34	1.2e-05	K	GALSDHEQR	R
1	RBR1	NGSrhino	Q Exactive	186	yes	AT2G07698	Symbols: | ATPase, F1 complex, alpha subunit protein | chr2:3361474-3364028 FORWARD LENGTH=777	130	85879	3	3	4.1	777	3594	1	1	1	625.825	1249.63	2	1249.63	0.0043	277	287	0	64.43	37	1.9e-05	R	AAELTNLFESR	I
1	RBR1	NGSrhino	Q Exactive	186	yes	AT2G07698	Symbols: | ATPase, F1 complex, alpha subunit protein | chr2:3361474-3364028 FORWARD LENGTH=777	130	85879	3	3	4.1	777	4261	1	1	1	665.885	1329.75	2	1329.75	0.0041	448	459	0	56.55	32	4.1e-05	K	TTIAIDTILNQK	Q
1	RBR1	NGSrhino	Q Exactive	187	yes	AT3G61650	Symbols: TUBG1 | gamma-tubulin | chr3:22812601-22815011 REVERSE LENGTH=474	130	53213	3	3	9.1	474	1810	1	1	1	520.313	1038.61	2	1038.61	0.0041	64	72	0	52.8	29	4.4e-05	R	ALLIDLEPR	V
1	RBR1	NGSrhino	Q Exactive	187	yes	AT3G61650	Symbols: TUBG1 | gamma-tubulin | chr3:22812601-22815011 REVERSE LENGTH=474	130	53213	3	3	9.1	474	4213	1	1	1	662.338	1322.66	2	1322.66	0.001	429	439	0	63.08	36	2.1e-05	R	DIIESLVDEYK	A
1	RBR1	NGSrhino	Q Exactive	187	yes	AT3G61650	Symbols: TUBG1 | gamma-tubulin | chr3:22812601-22815011 REVERSE LENGTH=474	130	53213	3	3	9.1	474	11669	1	1	1	885.143	2652.41	3	2651.39	1.0145	319	341	0	67.79	32	2.9e-06	K	YISILNIIQGEVDPTQVHESLQR	I
1	RBR1	NGSrhino	Q Exactive	188	yes	AT5G06600	Symbols: UBP12 | ubiquitin-specific protease 12 | chr5:2019545-2027834 REVERSE LENGTH=1116	130	130525	3	3	2.4	1116	1292	1	1	1	486.269	970.523	2	970.524	-0.0008	1106	1113	1	35.38	33	0.0072	R	HAYEKPVK	I
1	RBR1	NGSrhino	Q Exactive	188	yes	AT5G06600	Symbols: UBP12 | ubiquitin-specific protease 12 | chr5:2019545-2027834 REVERSE LENGTH=1116	130	130525	3	3	2.4	1116	1697	1	1	1	512.79	1023.57	2	1023.56	0.0012	690	697	0	66.64	32	4.1e-06	K	EDILLFFK	L
1	RBR1	NGSrhino	Q Exactive	188	yes	AT5G06600	Symbols: UBP12 | ubiquitin-specific protease 12 | chr5:2019545-2027834 REVERSE LENGTH=1116	130	130525	3	3	2.4	1116	3504	1	1	1	620.313	1238.61	2	1238.61	-0.0017	253	263	0	87.57	36	7.5e-08	K	LQYNDTSVATK	E
1	RBR1	NGSrhino	Q Exactive	189	yes	AT3G11830	Symbols: | TCP-1/cpn60 chaperonin family protein | chr3:3732734-3736156 FORWARD LENGTH=557	129	59739	3	3	9.5	557	6009	1	1	1	777.405	1552.8	2	1552.79	0.0077	296	309	0	68.6	35	5.3e-06	R	LAIGDLATQYFADR	D
1	RBR1	NGSrhino	Q Exactive	189	yes	AT3G11830	Symbols: | TCP-1/cpn60 chaperonin family protein | chr3:3732734-3736156 FORWARD LENGTH=557	129	59739	3	3	9.5	557	6814	1	1	1	837.922	1673.83	2	1673.83	0	405	421	0	39.89	37	0.0053	K	NSTVVPGGGAIDMEISK	Y
1	RBR1	NGSrhino	Q Exactive	189	yes	AT3G11830	Symbols: | TCP-1/cpn60 chaperonin family protein | chr3:3732734-3736156 FORWARD LENGTH=557	129	59739	3	3	9.5	557	10350	1	1	1	760.723	2279.15	3	2279.15	-0.0066	88	109	0	67.55	35	6.5e-06	K	SQDSEVGDGTTTVVLLAAEFLK	E
1	RBR1	NGSrhino	Q Exactive	190	yes	AT1G02690	Symbols: IMPA-6 | importin alpha isoform 6 | chr1:584397-587036 FORWARD LENGTH=538	127	59352	3	3	7.8	538	4427	1	1	1	679.408	1356.8	2	1356.8	-0.0008	157	169	0	35.25	28	0.0023	R	VIIDSGAVPLFVK	L
1	RBR1	NGSrhino	Q Exactive	190	yes	AT1G02690	Symbols: IMPA-6 | importin alpha isoform 6 | chr1:584397-587036 FORWARD LENGTH=538	127	59352	3	3	7.8	538	5874	1	1	1	764.456	1526.9	2	1526.89	0.0055	432	445	0	66.84	27	1.1e-06	R	VVTVTLEGLENILK	V
1	RBR1	NGSrhino	Q Exactive	190	yes	AT1G02690	Symbols: IMPA-6 | importin alpha isoform 6 | chr1:584397-587036 FORWARD LENGTH=538	127	59352	3	3	7.8	538	7823	1	1	0	923.432	1844.85	2	1844.85	-0.0046	475	489	0	71.45	35	2.7e-06	K	IENLQSHDNNEIYEK	A
1	RBR1	NGSrhino	Q Exactive	191	yes	AT5G35620	Symbols: LSP1, EIF(ISO)4E, LSP, EIF4E2, eIFiso4E | Eukaryotic initiation factor 4E protein | chr5:13824946-13826331 REVERSE LENGTH=198	127	22500	2	2	16.7	198	2475	1	1	1	559.799	1117.58	2	1117.58	0.0024	161	171	0	55.77	37	0.00014	K	SNEAVLMGIGK	K
1	RBR1	NGSrhino	Q Exactive	191	yes	AT5G35620	Symbols: LSP1, EIF(ISO)4E, LSP, EIF4E2, eIFiso4E | Eukaryotic initiation factor 4E protein | chr5:13824946-13826331 REVERSE LENGTH=198	127	22500	2	2	16.7	198	11642	1	1	1	879.086	2634.24	3	2634.23	0.0095	53	74	0	101.95	36	2.7e-09	K	AYTFDTVEDFWGLHETIFQTSK	L
1	RBR1	NGSrhino	Q Exactive	192	yes	AT5G15610	Symbols: | Proteasome component (PCI) domain protein | chr5:5079579-5081929 FORWARD LENGTH=442	125	49736	3	3	7.5	442	61	1	0	0	403.245	804.476	2	804.475	0.0012	226	232	0	47.98	33	0.00036	R	AVIEFVK	A
1	RBR1	NGSrhino	Q Exactive	192	yes	AT5G15610	Symbols: | Proteasome component (PCI) domain protein | chr5:5079579-5081929 FORWARD LENGTH=442	125	49736	3	3	7.5	442	1063	1	1	1	471.256	940.498	2	940.498	0	107	114	0	55.19	32	5.8e-05	K	VIQQPNDK	A
1	RBR1	NGSrhino	Q Exactive	192	yes	AT5G15610	Symbols: | Proteasome component (PCI) domain protein | chr5:5079579-5081929 FORWARD LENGTH=442	125	49736	3	3	7.5	442	8314	1	1	1	645.351	1933.03	3	1933.02	0.0076	53	70	0	78.7	33	3.1e-07	K	WLDLATLMVTSADLVSAK	I
1	RBR1	NGSrhino	Q Exactive	193	yes	AT1G30630	Symbols: | Coatomer epsilon subunit | chr1:10858546-10860173 REVERSE LENGTH=292	125	32581	3	3	24.7	292	12238	1	1	1	945.512	2833.51	3	2833.51	0.0032	49	75	0	66.68	30	2.6e-06	R	AYIALGSYQLVISEIDEAAATPLQAVK	L
1	RBR1	NGSrhino	Q Exactive	193	yes	AT1G30630	Symbols: | Coatomer epsilon subunit | chr1:10858546-10860173 REVERSE LENGTH=292	125	32581	3	3	24.7	292	12536	1	1	1	976.5	2926.48	3	2925.45	1.0236	161	187	0	71.64	34	2e-06	R	VMQQIDEDHTLTQLASAWLNLAVGGSK	I	Deamidated (NQ)	0.000000000000200000000000000.0
1	RBR1	NGSrhino	Q Exactive	194	yes	AT1G04270	Symbols: RPS15 | cytosolic ribosomal protein S15 | chr1:1141852-1142960 REVERSE LENGTH=152	125	17118	2	2	19.1	152	4296	1	1	1	668.846	1335.68	2	1335.68	-0.0001	73	84	1	69.44	37	6.3e-06	R	EAPQGEKPEPVR	T
1	RBR1	NGSrhino	Q Exactive	194	yes	AT1G04270	Symbols: RPS15 | cytosolic ribosomal protein S15 | chr1:1141852-1142960 REVERSE LENGTH=152	125	17118	2	2	19.1	152	7691	1	1	0	910.452	1818.89	2	1818.89	-0.0024	26	42	0	81.76	37	3.4e-07	K	GVDLDALLDMSTDDLVK	L
1	RBR1	NGSrhino	Q Exactive	195	yes	AT4G18100	Symbols: | Ribosomal protein L32e | chr4:10035715-10036475 REVERSE LENGTH=133	125	15493	3	2	23.3	133	5022	1	1	1	719.356	1436.7	2	1436.7	-0.0005	49	62	0	40.34	36	0.0045	K	GVTLMPNVGYGSDK	K
1	RBR1	NGSrhino	Q Exactive	195	yes	AT4G18100	Symbols: | Ribosomal protein L32e | chr4:10035715-10036475 REVERSE LENGTH=133	125	15493	3	2	23.3	133	9308	1	1	1	690.682	2069.02	3	2069.02	0.004	75	91	0	75.58	36	1.2e-06	K	FVVHNTSELELLMMHNR	T
1	RBR1	NGSrhino	Q Exactive	196	yes	AT5G20160	Symbols: | Ribosomal protein L7Ae/L30e/S12e/Gadd45 family protein | chr5:6804075-6805102 REVERSE LENGTH=128	124	13888	2	2	40.6	128	11710	1	1	1	889.472	2665.39	3	2664.4	0.9921	10	33	0	65.15	33	6.7e-06	K	AYPLADSQLSITILDLVQQATNYK	Q
1	RBR1	NGSrhino	Q Exactive	196	yes	AT5G20160	Symbols: | Ribosomal protein L7Ae/L30e/S12e/Gadd45 family protein | chr5:6804075-6805102 REVERSE LENGTH=128	124	13888	2	2	40.6	128	12707	1	1	1	1011.88	3032.61	3	3032.61	-0.0055	49	76	0	83.51	31	6e-08	R	GISEFVVMAADAEPLEILLHLPLLAEDK	N
1	RBR1	NGSrhino	Q Exactive	197	yes	AT1G07790	Symbols: HTB1 | Histone superfamily protein | chr1:2413049-2413495 FORWARD LENGTH=148	124	16392	3	3	20.9	148	44	1	1	1	401.743	801.471	2	801.471	0.0006	110	116	1	55.87	37	0.00013	K	KPTITSR	E
1	RBR1	NGSrhino	Q Exactive	197	yes	AT1G07790	Symbols: HTB1 | Histone superfamily protein | chr1:2413049-2413495 FORWARD LENGTH=148	124	16392	3	3	20.9	148	1054	1	1	1	470.298	938.582	2	938.58	0.0014	124	132	0	40.21	25	0.00033	R	LVLPGELAK	H
1	RBR1	NGSrhino	Q Exactive	197	yes	AT1G07790	Symbols: HTB1 | Histone superfamily protein | chr1:2413049-2413495 FORWARD LENGTH=148	124	16392	3	3	20.9	148	7091	1	1	1	865.418	1728.82	2	1728.82	-0.0009	82	96	0	85.04	36	1.4e-07	K	AMGIMNSFINDIFEK	L
1	RBR1	NGSrhino	Q Exactive	198	yes	AT4G27090	Symbols: | Ribosomal protein L14 | chr4:13594104-13595187 REVERSE LENGTH=134	123	15496	2	2	14.9	134	800	1	1	1	452.744	903.474	2	903.473	0.0002	70	77	0	49.84	37	0.00062	K	ALIEAMEK	A
1	RBR1	NGSrhino	Q Exactive	198	yes	AT4G27090	Symbols: | Ribosomal protein L14 | chr4:13594104-13595187 REVERSE LENGTH=134	123	15496	2	2	14.9	134	4514	1	0	0	686.396	1370.78	2	1370.78	0.0011	53	64	0	107.21	32	3.4e-10	R	LSLTDIVIDINR	V
1	RBR1	NGSrhino	Q Exactive	199	yes	AT1G23410	Symbols: | Ribosomal protein S27a / Ubiquitin family protein | chr1:8314940-8315410 FORWARD LENGTH=156	122	17660	3	3	16.7	156	1366	1	1	1	491.292	980.57	2	980.569	0.0004	100	107	0	54.75	29	3.2e-05	K	LAVLQFYK	V
1	RBR1	NGSrhino	Q Exactive	199	yes	AT1G23410	Symbols: | Ribosomal protein S27a / Ubiquitin family protein | chr1:8314940-8315410 FORWARD LENGTH=156	122	17660	3	3	16.7	156	1996	1	1	1	533.283	1064.55	2	1064.55	0.0014	55	63	0	55.08	37	0.00016	R	TLADYNIQK	E
1	RBR1	NGSrhino	Q Exactive	199	yes	AT1G23410	Symbols: | Ribosomal protein S27a / Ubiquitin family protein | chr1:8314940-8315410 FORWARD LENGTH=156	122	17660	3	3	16.7	156	2012	1	1	0	534.316	1066.62	2	1066.61	0.0034	64	72	0	63.83	31	6.4e-06	K	ESTLHLVLR	L
1	RBR1	NGSrhino	Q Exactive	200	yes	AT1G27400	Symbols: | Ribosomal protein L22p/L17e family protein | chr1:9515230-9516725 FORWARD LENGTH=176	121	19885	3	3	16.5	176	2152	1	1	1	544.293	1086.57	2	1086.57	-0.0005	47	55	0	40.15	35	0.0034	R	YLEDVIAHK	Q
1	RBR1	NGSrhino	Q Exactive	200	yes	AT1G27400	Symbols: | Ribosomal protein L22p/L17e family protein | chr1:9515230-9516725 FORWARD LENGTH=176	121	19885	3	3	16.5	176	2420	1	1	1	557.809	1113.6	2	1113.6	0.001	160	169	1	74.97	34	9.7e-07	K	KEPETQLAAK	S
1	RBR1	NGSrhino	Q Exactive	200	yes	AT1G27400	Symbols: | Ribosomal protein L22p/L17e family protein | chr1:9515230-9516725 FORWARD LENGTH=176	121	19885	3	3	16.5	176	2589	1	1	1	567.333	1132.65	2	1132.65	0.0026	88	97	0	58.12	32	2.9e-05	K	SAQFVLDLLK	N
1	RBR1	NGSrhino	Q Exactive	201	yes	AT5G09510	Symbols: | Ribosomal protein S19 family protein | chr5:2955698-2956554 REVERSE LENGTH=152	119	17061	2	2	19.1	152	3907	1	1	1	640.333	1278.65	2	1278.66	-0.0046	73	84	1	62.26	37	3.2e-05	R	EAPAGEKPEPVR	T
1	RBR1	NGSrhino	Q Exactive	201	yes	AT5G09510	Symbols: | Ribosomal protein S19 family protein | chr5:2955698-2956554 REVERSE LENGTH=152	119	17061	2	2	19.1	152	7691	1	0	0	910.452	1818.89	2	1818.89	-0.0024	26	42	0	81.76	37	3.4e-07	K	GVDLDALLDMSTDDLVK	L
1	RBR1	NGSrhino	Q Exactive	202	yes	AT5G05780	Symbols: RPN8A, AE3, ATHMOV34 | RP non-ATPase subunit 8A | chr5:1735862-1738176 FORWARD LENGTH=308	118	34706	4	4	19.8	308	2033	1	1	1	536.272	1070.53	2	1070.53	0.0019	144	152	0	40.73	34	0.0024	K	AYYAVEEVK	E
1	RBR1	NGSrhino	Q Exactive	202	yes	AT5G05780	Symbols: RPN8A, AE3, ATHMOV34 | RP non-ATPase subunit 8A | chr5:1735862-1738176 FORWARD LENGTH=308	118	34706	4	4	19.8	308	2623	1	1	1	568.813	1135.61	2	1135.61	-0.0005	218	227	0	57.62	34	5.1e-05	R	SYLDLVIEGK	L
1	RBR1	NGSrhino	Q Exactive	202	yes	AT5G05780	Symbols: RPN8A, AE3, ATHMOV34 | RP non-ATPase subunit 8A | chr5:1735862-1738176 FORWARD LENGTH=308	118	34706	4	4	19.8	308	5188	1	1	1	725.885	1449.76	2	1449.76	-0.0005	189	202	0	48.1	36	0.00066	K	DTTISTLATEVTAK	L
1	RBR1	NGSrhino	Q Exactive	202	yes	AT5G05780	Symbols: RPN8A, AE3, ATHMOV34 | RP non-ATPase subunit 8A | chr5:1735862-1738176 FORWARD LENGTH=308	118	34706	4	4	19.8	308	13120	1	1	1	828.71	3310.81	4	3310.81	0.0044	228	255	0	40.16	27	0.00054	K	LPLNHEILYHLQDVFNLLPNLNVNELVK	A
1	RBR1	NGSrhino	Q Exactive	203	yes	AT5G51570	Symbols: | SPFH/Band 7/PHB domain-containing membrane-associated protein family | chr5:20949511-20951234 FORWARD LENGTH=292	117	32357	2	2	10.3	292	6091	1	1	1	784.862	1567.71	2	1567.72	-0.0055	83	96	0	82.58	35	2.1e-07	K	ASADDAFYELQNPK	E
1	RBR1	NGSrhino	Q Exactive	203	yes	AT5G51570	Symbols: | SPFH/Band 7/PHB domain-containing membrane-associated protein family | chr5:20949511-20951234 FORWARD LENGTH=292	117	32357	2	2	10.3	292	8777	1	1	1	663.667	1987.98	3	1986.98	0.9998	234	249	0	62.76	36	2.5e-05	K	EVMDLIMITQYFDTIR	D
1	RBR1	NGSrhino	Q Exactive	204	yes	AT2G01250	Symbols: | Ribosomal protein L30/L7 family protein | chr2:132943-134264 REVERSE LENGTH=242	117	28153	2	2	9.9	242	1270	1	1	1	485.304	968.593	2	968.591	0.0027	6	14	0	36.27	29	0.0019	K	VVVPESVLK	K
1	RBR1	NGSrhino	Q Exactive	204	yes	AT2G01250	Symbols: | Ribosomal protein L30/L7 family protein | chr2:132943-134264 REVERSE LENGTH=242	117	28153	2	2	9.9	242	6102	1	1	1	786.434	1570.85	2	1570.86	-0.0031	161	175	0	104.47	33	8.6e-10	R	IALTDNSIVEQALGK	H
1	RBR1	NGSrhino	Q Exactive	205	yes	AT3G49010	Symbols: ATBBC1, BBC1, RSU2 | breast basic conserved 1 | chr3:18166971-18168047 REVERSE LENGTH=206	116	23752	4	4	20.4	206	1034	1	1	1	468.756	935.498	2	935.496	0.0013	73	80	0	37.45	35	0.0071	K	GFTLEELK	A
1	RBR1	NGSrhino	Q Exactive	205	yes	AT3G49010	Symbols: ATBBC1, BBC1, RSU2 | breast basic conserved 1 | chr3:18166971-18168047 REVERSE LENGTH=206	116	23752	4	4	20.4	206	3549	1	1	1	622.833	1243.65	2	1243.65	0.0002	104	114	0	54.34	36	0.00016	R	SLEGLQTNVQR	L
1	RBR1	NGSrhino	Q Exactive	205	yes	AT3G49010	Symbols: ATBBC1, BBC1, RSU2 | breast basic conserved 1 | chr3:18166971-18168047 REVERSE LENGTH=206	116	23752	4	4	20.4	206	3681	1	1	1	421.579	1261.72	3	1261.71	0.0021	88	99	0	58.5	32	2.2e-05	K	LAPTIGIAVDHR	R
1	RBR1	NGSrhino	Q Exactive	205	yes	AT3G49010	Symbols: ATBBC1, BBC1, RSU2 | breast basic conserved 1 | chr3:18166971-18168047 REVERSE LENGTH=206	116	23752	4	4	20.4	206	3825	1	1	1	639.324	1276.63	2	1276.63	0.0015	3	13	0	43.26	37	0.0025	K	HNNVIPNGHFK	K	Deamidated (NQ)	0.00000020000.0
1	RBR1	NGSrhino	Q Exactive	206	yes	AT2G04030	Symbols: CR88, EMB1956, HSP90.5, Hsp88.1, AtHsp90.5 | Chaperone protein htpG family protein | chr2:1281983-1285909 FORWARD LENGTH=780	116	88608	2	2	4.1	780	2552	1	0	0	564.771	1127.53	2	1127.52	0.003	79	87	0	64.27	35	1.2e-05	K	FEYQAEVSR	L
1	RBR1	NGSrhino	Q Exactive	206	yes	AT2G04030	Symbols: CR88, EMB1956, HSP90.5, Hsp88.1, AtHsp90.5 | Chaperone protein htpG family protein | chr2:1281983-1285909 FORWARD LENGTH=780	116	88608	2	2	4.1	780	11802	1	1	1	902.48	2704.42	3	2704.42	-0.0028	558	580	0	81.54	32	1.3e-07	K	DIEVLYLVEPIDEVAIQNLQTYK	E
1	RBR1	NGSrhino	Q Exactive	207	yes	AT4G29410	Symbols: | Ribosomal L28e protein family | chr4:14468439-14469964 REVERSE LENGTH=143	116	15901	3	2	20.3	143	5589	1	0	0	748.431	1494.85	2	1494.84	0.0021	2	14	0	56.83	30	2.2e-05	M	ATVPGQLIWEIVK	R	Acetyl (Protein N-term)	1.0000000000000.0
1	RBR1	NGSrhino	Q Exactive	207	yes	AT4G29410	Symbols: | Ribosomal L28e protein family | chr4:14468439-14469964 REVERSE LENGTH=143	116	15901	3	2	20.3	143	8118	1	1	1	631.669	1891.98	3	1891.98	0.0055	100	115	1	59.33	35	4e-05	K	VVANQVVDNYYRPDLK	K
1	RBR1	NGSrhino	Q Exactive	208	yes	AT1G29030	Symbols: | Apoptosis inhibitory protein 5 (API5) | chr1:10129201-10133697 REVERSE LENGTH=556	114	62241	2	2	5.6	556	3669	1	1	1	630.862	1259.71	2	1259.71	0.0008	477	489	1	41.43	33	0.0018	K	VTKPLASTTTGGK	R
1	RBR1	NGSrhino	Q Exactive	208	yes	AT1G29030	Symbols: | Apoptosis inhibitory protein 5 (API5) | chr1:10129201-10133697 REVERSE LENGTH=556	114	62241	2	2	5.6	556	9354	1	1	1	1040.47	2078.93	2	2078.93	0.0019	196	213	0	96.08	34	7.6e-09	K	SLGDVTGEEFNMFMDFLK	S
1	RBR1	NGSrhino	Q Exactive	209	yes	AT4G31480	Symbols: | Coatomer, beta subunit | chr4:15264145-15267384 FORWARD LENGTH=948	114	106077	3	3	4.2	948	2352	1	1	1	551.809	1101.6	2	1101.6	0.0003	929	939	0	39.67	36	0.0051	K	TQGIALSLGDK	I
1	RBR1	NGSrhino	Q Exactive	209	yes	AT4G31480	Symbols: | Coatomer, beta subunit | chr4:15264145-15267384 FORWARD LENGTH=948	114	106077	3	3	4.2	948	3548	1	1	1	622.833	1243.65	2	1243.65	-0.0001	853	863	0	82.04	36	2.7e-07	K	VAVNTTIQNER	E
1	RBR1	NGSrhino	Q Exactive	209	yes	AT4G31480	Symbols: | Coatomer, beta subunit | chr4:15264145-15267384 FORWARD LENGTH=948	114	106077	3	3	4.2	948	9569	1	1	1	532.519	2126.05	4	2126.04	0.0023	662	679	0	52.11	36	0.00028	K	TQTTHAQPDDLIDFFHLK	S
1	RBR1	NGSrhino	Q Exactive	210	yes	AT5G17270	Symbols: | Protein prenylyltransferase superfamily protein | chr5:5679995-5685597 FORWARD LENGTH=899	114	100939	4	4	5.9	899	288	1	1	1	421.227	840.439	2	840.438	0.0008	660	666	0	48.16	33	0.00032	K	ESFIAFK	E
1	RBR1	NGSrhino	Q Exactive	210	yes	AT5G17270	Symbols: | Protein prenylyltransferase superfamily protein | chr5:5679995-5685597 FORWARD LENGTH=899	114	100939	4	4	5.9	899	2136	1	1	1	542.829	1083.64	2	1083.64	0.0034	710	718	1	54.44	30	4.2e-05	K	RVDVVLLDR	I
1	RBR1	NGSrhino	Q Exactive	210	yes	AT5G17270	Symbols: | Protein prenylyltransferase superfamily protein | chr5:5679995-5685597 FORWARD LENGTH=899	114	100939	4	4	5.9	899	4079	1	1	1	652.322	1302.63	2	1302.62	0.0047	157	166	0	50.05	36	0.00042	K	ELVEWENWAK	I
1	RBR1	NGSrhino	Q Exactive	210	yes	AT5G17270	Symbols: | Protein prenylyltransferase superfamily protein | chr5:5679995-5685597 FORWARD LENGTH=899	114	100939	4	4	5.9	899	12653	1	1	1	993.502	2977.48	3	2977.5	-0.0185	72	98	0	42.04	34	0.002	K	LILGDSELNLVDTVDSAEQVYSELLDK	V
1	RBR1	NGSrhino	Q Exactive	211	yes	AT5G27970	Symbols: | ARM repeat superfamily protein | chr5:10004720-10015429 FORWARD LENGTH=1630	112	180370	2	2	1.7	1630	3010	1	1	1	592.337	1182.66	2	1182.66	-0.0009	2	12	0	77.49	32	3.1e-07	M	ALVAALEADLR	A	Acetyl (Protein N-term)	1.00000000000.0
1	RBR1	NGSrhino	Q Exactive	211	yes	AT5G27970	Symbols: | ARM repeat superfamily protein | chr5:10004720-10015429 FORWARD LENGTH=1630	112	180370	2	2	1.7	1630	7739	1	1	1	611.049	1830.12	3	1830.12	0.0012	1311	1327	0	56.95	20	2e-06	K	LIPALIELLLQAPAVEK	Y
1	RBR1	NGSrhino	Q Exactive	212	yes	AT5G05010	Symbols: | clathrin adaptor complexes medium subunit family protein | chr5:1477137-1479872 FORWARD LENGTH=527	111	57682	2	2	6.3	527	7271	1	1	1	879.996	1757.98	2	1757.98	-0.0005	73	88	0	90.58	32	1.5e-08	K	QSNILEDLATLTLLSK	L
1	RBR1	NGSrhino	Q Exactive	212	yes	AT5G05010	Symbols: | clathrin adaptor complexes medium subunit family protein | chr5:1477137-1479872 FORWARD LENGTH=527	111	57682	2	2	6.3	527	8921	1	1	1	671.386	2011.14	3	2010.14	0.9927	56	72	0	43.47	28	0.00034	R	YVYQPIEALFLLLVTTK	Q
1	RBR1	NGSrhino	Q Exactive	213	yes	AT5G13530	Symbols: KEG | protein kinases;ubiquitin-protein ligases | chr5:4345618-4354369 FORWARD LENGTH=1625	110	178102	2	2	1.5	1625	4767	1	1	1	701.382	1400.75	2	1400.75	0.0017	808	818	0	67.19	35	6.1e-06	R	ENLDWLIVMLR	S
1	RBR1	NGSrhino	Q Exactive	213	yes	AT5G13530	Symbols: KEG | protein kinases;ubiquitin-protein ligases | chr5:4345618-4354369 FORWARD LENGTH=1625	110	178102	2	2	1.5	1625	6120	1	1	1	788.898	1575.78	2	1575.79	-0.0049	844	856	0	66.88	37	1e-05	R	EWISEDLMEALLK	R
1	RBR1	NGSrhino	Q Exactive	214	yes	AT4G15640	Symbols: | unknown protein; BEST Arabidopsis thaliana protein match is: unknown protein (TAIR:AT3G21465.1); Has 38 Blast hits to 38 proteins in 14 species: Archae - 0; Bacteria - 0; Metazoa - 0; Fungi - 0; Plants - 38; Viruses - 0; Other Eukaryote	110	43883	2	2	5.9	390	2569	1	1	1	566.3	1130.59	2	1130.58	0.0031	375	384	0	59.59	37	5.6e-05	K	VSVDLDELNK	N
1	RBR1	NGSrhino	Q Exactive	214	yes	AT4G15640	Symbols: | unknown protein; BEST Arabidopsis thaliana protein match is: unknown protein (TAIR:AT3G21465.1); Has 38 Blast hits to 38 proteins in 14 species: Archae - 0; Bacteria - 0; Metazoa - 0; Fungi - 0; Plants - 38; Viruses - 0; Other Eukaryote	110	43883	2	2	5.9	390	6052	1	1	1	782.392	1562.77	2	1562.77	0.0005	198	210	0	77.92	37	8.6e-07	K	NSELMEEVMQLLK	T
1	RBR1	NGSrhino	Q Exactive	215	yes	AT1G06220	Symbols: MEE5, CLO, GFA1 | Ribosomal protein S5/Elongation factor G/III/V family protein | chr1:1900524-1904583 FORWARD LENGTH=987	110	110372	3	3	4	987	677	1	1	1	444.749	887.483	2	887.482	0.0007	515	522	0	49.31	38	0.00075	R	LQTGQSVR	V
1	RBR1	NGSrhino	Q Exactive	215	yes	AT1G06220	Symbols: MEE5, CLO, GFA1 | Ribosomal protein S5/Elongation factor G/III/V family protein | chr1:1900524-1904583 FORWARD LENGTH=987	110	110372	3	3	4	987	1564	1	1	1	504.243	1006.47	2	1006.47	0.0004	463	471	0	66.82	36	9.2e-06	K	VDHSYTGTK	D
1	RBR1	NGSrhino	Q Exactive	215	yes	AT1G06220	Symbols: MEE5, CLO, GFA1 | Ribosomal protein S5/Elongation factor G/III/V family protein | chr1:1900524-1904583 FORWARD LENGTH=987	110	110372	3	3	4	987	10949	1	1	1	807.733	2420.18	3	2420.18	0.0003	635	656	0	54.51	36	0.00016	K	VEESGEHTILGTGELYLDSIMK	D
1	RBR1	NGSrhino	Q Exactive	216	yes	AT1G51380	Symbols: | DEA(D/H)-box RNA helicase family protein | chr1:19047960-19049967 FORWARD LENGTH=392	109	44329	2	2	5.4	392	1382	1	1	1	493.275	984.535	2	984.535	-0.0002	44	51	1	69.48	33	2.7e-06	K	KPSEIQQR	A
1	RBR1	NGSrhino	Q Exactive	216	yes	AT1G51380	Symbols: | DEA(D/H)-box RNA helicase family protein | chr1:19047960-19049967 FORWARD LENGTH=392	109	44329	2	2	5.4	392	5565	1	1	1	746.385	1490.75	2	1490.75	0.0011	167	179	0	69.3	37	6.1e-06	K	LLVLDESDEMLSK	G
1	RBR1	NGSrhino	Q Exactive	217	yes	AT2G40730	Symbols: | Protein kinase family protein with ARM repeat domain | chr2:16990083-16996072 REVERSE LENGTH=798	108	85993	2	2	3.4	798	5926	1	1	1	767.936	1533.86	2	1533.86	0.0018	542	554	0	90.72	31	1.1e-08	K	AFQAVEQFLQILK	Q
1	RBR1	NGSrhino	Q Exactive	217	yes	AT2G40730	Symbols: | Protein kinase family protein with ARM repeat domain | chr2:16990083-16996072 REVERSE LENGTH=798	108	85993	2	2	3.4	798	6795	1	1	1	557.976	1670.91	3	1670.91	0.0008	288	301	0	41.28	33	0.0019	K	LVDTIHFMDILNLK	D
1	RBR1	NGSrhino	Q Exactive	218	no	AT2G45250	Symbols: | Integral membrane protein hemolysin-III homolog | chr2:18661464-18662550 FORWARD LENGTH=204	108	22288	4	4	19.1	204	87	1	1	1	406.219	810.424	2	810.424	0.0003	163	169	0	42.7	33	0.0013	K	HAVDLEK	R
1	RBR1	NGSrhino	Q Exactive	218	no	AT2G45250	Symbols: | Integral membrane protein hemolysin-III homolog | chr2:18661464-18662550 FORWARD LENGTH=204	108	22288	4	4	19.1	204	860	1	1	1	456.786	911.558	2	911.555	0.0025	185	193	0	47.21	29	0.00018	R	VAALNVLGR	S
1	RBR1	NGSrhino	Q Exactive	218	no	AT2G45250	Symbols: | Integral membrane protein hemolysin-III homolog | chr2:18661464-18662550 FORWARD LENGTH=204	108	22288	4	4	19.1	204	2957	1	1	1	590.304	1178.59	2	1178.59	0.0007	171	180	0	41.27	37	0.0042	R	SIQFSLEEAR	E
1	RBR1	NGSrhino	Q Exactive	218	no	AT2G45250	Symbols: | Integral membrane protein hemolysin-III homolog | chr2:18661464-18662550 FORWARD LENGTH=204	108	22288	4	4	19.1	204	4354	1	1	1	673.863	1345.71	2	1345.71	0.0025	44	56	0	68.79	36	6.1e-06	K	AIEQDTVSSIGVK	K
1	RBR1	NGSrhino	Q Exactive	219	yes	AT3G60770	Symbols: | Ribosomal protein S13/S15 | chr3:22460525-22461656 REVERSE LENGTH=151	107	17085	4	3	23.8	151	213	1	1	1	415.261	828.508	2	828.507	0.0011	115	121	0	40	34	0.0026	R	LILVESR	I
1	RBR1	NGSrhino	Q Exactive	219	yes	AT3G60770	Symbols: | Ribosomal protein S13/S15 | chr3:22460525-22461656 REVERSE LENGTH=151	107	17085	4	3	23.8	151	3616	1	1	1	627.384	1252.75	2	1252.75	0.0034	44	55	0	72.06	26	2.6e-07	K	GLTPSQIGVILR	D
1	RBR1	NGSrhino	Q Exactive	219	yes	AT3G60770	Symbols: | Ribosomal protein S13/S15 | chr3:22460525-22461656 REVERSE LENGTH=151	107	17085	4	3	23.8	151	8215	1	1	1	639.349	1915.03	3	1915.02	0.0048	77	93	0	39.01	33	0.0029	K	AHGLAPEIPEDLYHLIK	K
1	RBR1	NGSrhino	Q Exactive	220	yes	AT2G35900	Symbols: | unknown protein; FUNCTIONS IN: molecular_function unknown; INVOLVED IN: biological_process unknown; LOCATED IN: nucleus; EXPRESSED IN: 20 plant structures; EXPRESSED DURING: 13 growth stages; Has 32 Blast hits to 32 proteins in 12 speci	107	21225	2	2	17.7	192	1722	1	1	1	514.288	1026.56	2	1026.56	0.0002	104	112	0	40.71	33	0.0018	K	NPLNFPGLR	R
1	RBR1	NGSrhino	Q Exactive	220	yes	AT2G35900	Symbols: | unknown protein; FUNCTIONS IN: molecular_function unknown; INVOLVED IN: biological_process unknown; LOCATED IN: nucleus; EXPRESSED IN: 20 plant structures; EXPRESSED DURING: 13 growth stages; Has 32 Blast hits to 32 proteins in 12 speci	107	21225	2	2	17.7	192	12228	1	1	1	707.813	2827.22	4	2827.22	-0.0003	128	152	0	94.81	31	4.9e-09	K	SFFDAAEEMTSSLFDIMGDHHPSTR	R
1	RBR1	NGSrhino	Q Exactive	221	yes	AT3G52140	Symbols: | tetratricopeptide repeat (TPR)-containing protein | chr3:19333232-19341295 FORWARD LENGTH=1403	105	153170	3	3	3.8	1403	5859	1	1	1	762.945	1523.87	2	1522.87	1.0028	575	589	0	47.18	28	0.00014	R	VVAQSVLPGILQGDK	S
1	RBR1	NGSrhino	Q Exactive	221	yes	AT3G52140	Symbols: | tetratricopeptide repeat (TPR)-containing protein | chr3:19333232-19341295 FORWARD LENGTH=1403	105	153170	3	3	3.8	1403	7905	1	1	1	931.519	1861.02	2	1860.02	0.9994	287	303	0	41.93	31	0.00083	R	LVGDLIYLDVVTLEGNK	Y
1	RBR1	NGSrhino	Q Exactive	221	yes	AT3G52140	Symbols: | tetratricopeptide repeat (TPR)-containing protein | chr3:19333232-19341295 FORWARD LENGTH=1403	105	153170	3	3	3.8	1403	11312	1	1	1	847.768	2540.28	3	2540.28	0.0031	991	1012	1	60.26	35	3.2e-05	K	YDFSANTPFETSDILDLRPVIK	H
1	RBR1	NGSrhino	Q Exactive	222	yes	AT3G53020	Symbols: STV1, RPL24B, RPL24 | Ribosomal protein L24e family protein | chr3:19660749-19661912 REVERSE LENGTH=163	102	18620	3	3	16.6	163	200	1	1	1	414.732	827.45	2	827.45	-0.0001	98	104	1	45.23	33	0.00072	R	AEKPEVR	D
1	RBR1	NGSrhino	Q Exactive	222	yes	AT3G53020	Symbols: STV1, RPL24B, RPL24 | Ribosomal protein L24e family protein | chr3:19660749-19661912 REVERSE LENGTH=163	102	18620	3	3	16.6	163	1596	1	1	1	506.259	1010.5	2	1010.5	0.0026	51	58	0	41.1	35	0.0028	K	LAWTAMYR	K
1	RBR1	NGSrhino	Q Exactive	222	yes	AT3G53020	Symbols: STV1, RPL24B, RPL24 | Ribosomal protein L24e family protein | chr3:19660749-19661912 REVERSE LENGTH=163	102	18620	3	3	16.6	163	3652	1	1	1	629.375	1256.73	2	1256.73	0.0007	84	95	0	61.84	31	9.3e-06	R	SIVGATLEVIQK	K
1	RBR1	NGSrhino	Q Exactive	223	yes	AT3G06720	Symbols: AT-IMP, ATKAP ALPHA, AIMP ALPHA, IMPA-1, IMPA1 | importin alpha isoform 1 | chr3:2120559-2123555 FORWARD LENGTH=532	101	58608	3	3	6.6	532	494	1	0	0	433.759	865.504	2	865.502	0.0014	242	249	0	48.64	29	0.00013	K	PALPALER	L
1	RBR1	NGSrhino	Q Exactive	223	yes	AT3G06720	Symbols: AT-IMP, ATKAP ALPHA, AIMP ALPHA, IMPA-1, IMPA1 | importin alpha isoform 1 | chr3:2120559-2123555 FORWARD LENGTH=532	101	58608	3	3	6.6	532	3614	1	1	1	626.886	1251.76	2	1251.76	0.002	277	288	0	33.22	25	0.0017	K	IQTVIQAGVVPK	L
1	RBR1	NGSrhino	Q Exactive	223	yes	AT3G06720	Symbols: AT-IMP, ATKAP ALPHA, AIMP ALPHA, IMPA-1, IMPA1 | importin alpha isoform 1 | chr3:2120559-2123555 FORWARD LENGTH=532	101	58608	3	3	6.6	532	7823	1	0	0	923.432	1844.85	2	1844.85	-0.0046	471	485	0	71.45	35	2.7e-06	K	IENLQSHDNNEIYEK	A
1	RBR1	NGSrhino	Q Exactive	224	yes	AT5G65720	Symbols: ATNIFS1, NIFS1, NFS1, ATNFS1 | nitrogen fixation S (NIFS)-like 1 | chr5:26296349-26297710 FORWARD LENGTH=453	101	50263	2	2	4.6	453	3088	1	1	1	597.317	1192.62	2	1192.62	-0.0007	144	153	0	61.85	36	3e-05	K	HVITTQTEHK	C
1	RBR1	NGSrhino	Q Exactive	224	yes	AT5G65720	Symbols: ATNIFS1, NIFS1, NFS1, ATNFS1 | nitrogen fixation S (NIFS)-like 1 | chr5:26296349-26297710 FORWARD LENGTH=453	101	50263	2	2	4.6	453	3674	1	1	1	631.326	1260.64	2	1260.64	-0.0004	176	186	0	63.91	37	2.2e-05	K	TDGLVDLEMLR	E
1	RBR1	NGSrhino	Q Exactive	225	yes	AT1G76810	Symbols: | eukaryotic translation initiation factor 2 (eIF-2) family protein | chr1:28831366-28836310 REVERSE LENGTH=1294	98	142029	2	2	2.4	1294	6299	1	1	1	801.88	1601.74	2	1601.74	0.0025	533	547	0	56.33	35	8.6e-05	K	GIDTSVQGEDEVEPK	E
1	RBR1	NGSrhino	Q Exactive	225	yes	AT1G76810	Symbols: | eukaryotic translation initiation factor 2 (eIF-2) family protein | chr1:28831366-28836310 REVERSE LENGTH=1294	98	142029	2	2	2.4	1294	6984	1	1	1	570.014	1707.02	3	1707.02	0.0024	1179	1194	1	64.45	23	7.7e-07	K	KDPIVLGVDVIEGILK	I
1	RBR1	NGSrhino	Q Exactive	226	yes	AT3G52580	Symbols: | Ribosomal protein S11 family protein | chr3:19503324-19504701 FORWARD LENGTH=150	97	16228	3	2	16	150	2758	1	1	1	577.83	1153.65	2	1153.65	0.0007	11	21	0	43.58	31	0.00068	K	VENVTLGPAVR	E
1	RBR1	NGSrhino	Q Exactive	226	yes	AT3G52580	Symbols: | Ribosomal protein S11 family protein | chr3:19503324-19504701 FORWARD LENGTH=150	97	16228	3	2	16	150	5098	1	1	0	722.372	1442.73	2	1442.73	0.0047	128	140	0	58.79	35	5e-05	R	IEDVTPIPTDSTR	R
1	RBR1	NGSrhino	Q Exactive	227	yes	AT3G60830	Symbols: ATARP7, ARP7 | actin-related protein 7 | chr3:22474298-22476000 FORWARD LENGTH=363	97	39879	2	2	10.7	363	5111	1	1	1	482.893	1445.66	3	1444.66	0.9992	348	360	0	62.46	34	1.6e-05	K	ADYDETGPSVVHR	K
1	RBR1	NGSrhino	Q Exactive	227	yes	AT3G60830	Symbols: ATARP7, ARP7 | actin-related protein 7 | chr3:22474298-22476000 FORWARD LENGTH=363	97	39879	2	2	10.7	363	12458	1	1	1	961.848	2882.52	3	2882.52	0.0055	238	263	0	57.24	31	3e-05	R	YSVGEALFQPSILGLEEHGIVEQLVR	I
1	RBR1	NGSrhino	Q Exactive	228	yes	AT1G71820	Symbols: SEC6 | SEC6 | chr1:27010022-27016745 FORWARD LENGTH=752	96	85619	3	3	4.5	752	1051	1	1	1	470.254	938.494	2	938.493	0.0009	541	548	0	39.19	34	0.0031	K	EAVHQTVR	V
1	RBR1	NGSrhino	Q Exactive	228	yes	AT1G71820	Symbols: SEC6 | SEC6 | chr1:27010022-27016745 FORWARD LENGTH=752	96	85619	3	3	4.5	752	4845	1	1	1	707.336	1412.66	2	1412.66	-0.0074	633	643	0	80.48	35	3.4e-07	R	LDEEVLMDFFR	E
1	RBR1	NGSrhino	Q Exactive	228	yes	AT1G71820	Symbols: SEC6 | SEC6 | chr1:27010022-27016745 FORWARD LENGTH=752	96	85619	3	3	4.5	752	6690	1	1	1	826.004	1649.99	2	1650	-0.0028	21	35	0	30.31	22	0.0015	K	LLPLPELLQSISSIK	A
1	RBR1	NGSrhino	Q Exactive	229	yes	AT3G45630	Symbols: | RNA binding (RRM/RBD/RNP motifs) family protein | chr3:16748751-16753190 REVERSE LENGTH=989	96	108371	2	2	4.7	989	4445	1	1	1	680.836	1359.66	2	1359.66	-0.0057	346	359	0	38.34	35	0.0054	K	AANGPVSSSNSLQK	A	Deamidated (NQ)	0.00200000000000.0
1	RBR1	NGSrhino	Q Exactive	229	yes	AT3G45630	Symbols: | RNA binding (RRM/RBD/RNP motifs) family protein | chr3:16748751-16753190 REVERSE LENGTH=989	96	108371	2	2	4.7	989	13522	1	1	1	1236.24	3705.71	3	3705.71	0.0031	625	656	0	81.02	33	2e-07	R	SNIQNTEDDIISNILDFDPWDESLTSQHNFAK	L
1	RBR1	NGSrhino	Q Exactive	230	yes	AT1G15480	Symbols: | Tetratricopeptide repeat (TPR)-like superfamily protein | chr1:5318307-5320422 FORWARD LENGTH=594	95	67489	2	2	3.9	594	2541	1	1	1	563.857	1125.7	2	1125.7	-0.0008	280	289	0	56.22	25	8.4e-06	K	IADVLLLLEK	E
1	RBR1	NGSrhino	Q Exactive	230	yes	AT1G15480	Symbols: | Tetratricopeptide repeat (TPR)-like superfamily protein | chr1:5318307-5320422 FORWARD LENGTH=594	95	67489	2	2	3.9	594	4824	1	1	1	704.895	1407.78	2	1407.78	0.0003	398	410	0	63.07	32	8.6e-06	R	YNEVLAAILAFGK	I
1	RBR1	NGSrhino	Q Exactive	231	yes	AT5G62190	Symbols: PRH75 | DEAD box RNA helicase (PRH75) | chr5:24980542-24983879 REVERSE LENGTH=671	95	72845	3	3	5.2	671	1630	1	1	1	508.762	1015.51	2	1015.51	0.0005	426	433	0	47.54	35	0.00067	R	EVEAYIHR	S
1	RBR1	NGSrhino	Q Exactive	231	yes	AT5G62190	Symbols: PRH75 | DEAD box RNA helicase (PRH75) | chr5:24980542-24983879 REVERSE LENGTH=671	95	72845	3	3	5.2	671	5178	1	1	1	725.384	1448.75	2	1448.76	-0.0043	263	275	0	57.4	36	7.8e-05	R	MGFVEDVELILGK	V
1	RBR1	NGSrhino	Q Exactive	232	yes	AT1G07705	Symbols: | NOT2 / NOT3 / NOT5 family | chr1:2382090-2385856 FORWARD LENGTH=614	95	65776	2	2	3.4	614	2754	1	1	1	577.781	1153.55	2	1153.55	0	605	614	1	47.5	35	0.00069	K	RPSISQDSQH	-
1	RBR1	NGSrhino	Q Exactive	232	yes	AT1G07705	Symbols: | NOT2 / NOT3 / NOT5 family | chr1:2382090-2385856 FORWARD LENGTH=614	95	65776	2	2	3.4	614	2805	1	1	1	580.377	1158.74	2	1158.74	0.0018	442	452	0	68.38	20	1.5e-07	R	FGLLGLLSVIK	M
1	RBR1	NGSrhino	Q Exactive	233	yes	AT3G11510	Symbols: | Ribosomal protein S11 family protein | chr3:3623757-3624866 REVERSE LENGTH=150	94	16263	3	2	16	150	2782	1	1	1	579.332	1156.65	2	1156.65	0.0032	11	21	0	41.8	34	0.0018	K	VETVTLGPSVR	E
1	RBR1	NGSrhino	Q Exactive	233	yes	AT3G11510	Symbols: | Ribosomal protein S11 family protein | chr3:3623757-3624866 REVERSE LENGTH=150	94	16263	3	2	16	150	5098	1	0	0	722.372	1442.73	2	1442.73	0.0047	128	140	0	58.79	35	5e-05	R	IEDVTPIPTDSTR	R
1	RBR1	NGSrhino	Q Exactive	234	yes	AT5G16130	Symbols: | Ribosomal protein S7e family protein | chr5:5268984-5269912 FORWARD LENGTH=190	94	22047	3	3	21.1	190	1986	1	1	1	532.319	1062.62	2	1062.62	0.0007	60	68	0	42.19	30	0.00073	K	AVVIYVPFR	L
1	RBR1	NGSrhino	Q Exactive	234	yes	AT5G16130	Symbols: | Ribosomal protein S7e family protein | chr5:5268984-5269912 FORWARD LENGTH=190	94	22047	3	3	21.1	190	2010	1	1	1	534.282	1066.55	2	1066.55	0.0017	167	175	0	39.01	35	0.0049	K	LETMVGVYR	K
1	RBR1	NGSrhino	Q Exactive	234	yes	AT5G16130	Symbols: | Ribosomal protein S7e family protein | chr5:5268984-5269912 FORWARD LENGTH=190	94	22047	3	3	21.1	190	10771	1	1	1	786.406	2356.2	3	2356.2	-0.0012	118	139	0	66.53	35	7.1e-06	R	TLTSVHEAMLEDVAFPAEIVGK	R
1	RBR1	NGSrhino	Q Exactive	235	yes	AT4G25630	Symbols: FIB2, ATFIB2 | fibrillarin 2 | chr4:13074239-13076205 FORWARD LENGTH=320	94	33632	2	2	8.8	320	300	1	1	1	421.748	841.481	2	841.481	0.0003	87	94	0	36.65	32	0.0041	R	HAGVFIAK	G
1	RBR1	NGSrhino	Q Exactive	235	yes	AT4G25630	Symbols: FIB2, ATFIB2 | fibrillarin 2 | chr4:13074239-13076205 FORWARD LENGTH=320	94	33632	2	2	8.8	320	9941	1	1	1	731.034	2190.08	3	2190.08	-0.0003	220	239	0	79.93	36	4.3e-07	R	MLVGMVDVIFSDVAQPDQAR	I
1	RBR1	NGSrhino	Q Exactive	236	yes	AT5G11980	Symbols: | conserved oligomeric Golgi complex component-related / COG complex component-related | chr5:3868809-3872146 REVERSE LENGTH=569	92	63012	2	2	5.4	569	6448	1	1	1	815.92	1629.83	2	1629.83	0.0004	231	244	0	73.96	36	1.9e-06	R	EAWLTGILEDLDQK	N
1	RBR1	NGSrhino	Q Exactive	236	yes	AT5G11980	Symbols: | conserved oligomeric Golgi complex component-related / COG complex component-related | chr5:3868809-3872146 REVERSE LENGTH=569	92	63012	2	2	5.4	569	8084	1	1	1	944.035	1886.06	2	1886.06	0.0012	339	355	0	40.7	29	0.00081	R	GLLPPLFEEAVLNLFSK	N
1	RBR1	NGSrhino	Q Exactive	237	yes	AT3G54110	Symbols: ATPUMP1, UCP, PUMP1, ATUCP1, UCP1 | plant uncoupling mitochondrial protein 1 | chr3:20038890-20040996 FORWARD LENGTH=306	90	32641	2	2	9.2	306	3623	1	1	1	627.85	1253.69	2	1253.69	-0.0025	174	185	0	56.1	32	4.8e-05	R	ALWTGLGPNVAR	N
1	RBR1	NGSrhino	Q Exactive	237	yes	AT3G54110	Symbols: ATPUMP1, UCP, PUMP1, ATUCP1, UCP1 | plant uncoupling mitochondrial protein 1 | chr3:20038890-20040996 FORWARD LENGTH=306	90	32641	2	2	9.2	306	7022	1	1	1	860.45	1718.89	2	1718.88	0.0021	186	201	0	56.98	36	8.4e-05	R	NAIINAAELASYDQVK	E
1	RBR1	NGSrhino	Q Exactive	238	yes	AT5G19485	Symbols: | transferases;nucleotidyltransferases | chr5:6573907-6576352 REVERSE LENGTH=456	86	49005	3	3	9.4	456	1217	1	1	1	481.283	960.551	2	960.551	0.0001	96	104	0	55.96	34	6.9e-05	R	AIAHHLTAK	D
1	RBR1	NGSrhino	Q Exactive	238	yes	AT5G19485	Symbols: | transferases;nucleotidyltransferases | chr5:6573907-6576352 REVERSE LENGTH=456	86	49005	3	3	9.4	456	2670	1	1	1	571.825	1141.64	2	1141.63	0.0013	218	227	0	43.93	34	0.001	R	AVLQEVLDQK	P
1	RBR1	NGSrhino	Q Exactive	238	yes	AT5G19485	Symbols: | transferases;nucleotidyltransferases | chr5:6573907-6576352 REVERSE LENGTH=456	86	49005	3	3	9.4	456	11631	1	1	1	875.505	2623.49	3	2623.49	-0.0004	27	50	1	37.8	23	0.00039	K	ALLPVANRPVLSYVLDLLESSNLK	D
1	RBR1	NGSrhino	Q Exactive	239	yes	AT4G27585	Symbols: | SPFH/Band 7/PHB domain-containing membrane-associated protein family | chr4:13766984-13769832 REVERSE LENGTH=411	86	44992	2	2	6.8	411	1723	1	1	1	514.312	1026.61	2	1026.61	0.002	182	191	0	50.46	31	0.00013	K	IVEAINVAAK	D
1	RBR1	NGSrhino	Q Exactive	239	yes	AT4G27585	Symbols: | SPFH/Band 7/PHB domain-containing membrane-associated protein family | chr4:13766984-13769832 REVERSE LENGTH=411	86	44992	2	2	6.8	411	9182	1	1	1	683.039	2046.1	3	2046.09	0.002	80	97	0	62.41	32	1.1e-05	K	YATTLPSGIHFLIPFVDR	I
1	RBR1	NGSrhino	Q Exactive	240	yes	AT5G10450	Symbols: GRF6, AFT1, 14-3-3lambda | G-box regulating factor 6 | chr5:3284452-3286261 REVERSE LENGTH=248	86	27958	3	3	14.9	248	826	1	1	1	454.267	906.519	2	906.517	0.0018	49	56	0	40.35	33	0.0019	R	NLLSVAYK	N
1	RBR1	NGSrhino	Q Exactive	240	yes	AT5G10450	Symbols: GRF6, AFT1, 14-3-3lambda | G-box regulating factor 6 | chr5:3284452-3286261 REVERSE LENGTH=248	86	27958	3	3	14.9	248	3053	1	1	1	595.335	1188.66	2	1188.65	0.0022	222	231	0	54.73	34	0.00011	K	DSTLIMQLLR	D
1	RBR1	NGSrhino	Q Exactive	240	yes	AT5G10450	Symbols: GRF6, AFT1, 14-3-3lambda | G-box regulating factor 6 | chr5:3284452-3286261 REVERSE LENGTH=248	86	27958	3	3	14.9	248	9639	1	1	1	715.01	2142.01	3	2142	0.0079	203	221	0	50.58	36	0.00036	K	QAFEEAIAELDTLGEESYK	D
1	RBR1	NGSrhino	Q Exactive	241	yes	AT5G22330	Symbols: ATTIP49A, RIN1 | P-loop containing nucleoside triphosphate hydrolases superfamily protein | chr5:7391026-7394071 REVERSE LENGTH=458	86	50292	4	4	8.1	458	923	1	1	1	460.769	919.524	2	919.524	0.0004	18	25	0	57.12	34	4.9e-05	R	IATHTHIK	G
1	RBR1	NGSrhino	Q Exactive	241	yes	AT5G22330	Symbols: ATTIP49A, RIN1 | P-loop containing nucleoside triphosphate hydrolases superfamily protein | chr5:7391026-7394071 REVERSE LENGTH=458	86	50292	4	4	8.1	458	1661	1	1	1	509.774	1017.53	2	1017.53	0.0001	6	14	0	41.18	37	0.0044	K	IEEIQSTAK	K
1	RBR1	NGSrhino	Q Exactive	241	yes	AT5G22330	Symbols: ATTIP49A, RIN1 | P-loop containing nucleoside triphosphate hydrolases superfamily protein | chr5:7391026-7394071 REVERSE LENGTH=458	86	50292	4	4	8.1	458	1696	1	1	1	512.775	1023.54	2	1023.53	0.0015	448	455	0	45.84	35	0.00092	K	LLHEQQEK	Y
1	RBR1	NGSrhino	Q Exactive	241	yes	AT5G22330	Symbols: ATTIP49A, RIN1 | P-loop containing nucleoside triphosphate hydrolases superfamily protein | chr5:7391026-7394071 REVERSE LENGTH=458	86	50292	4	4	8.1	458	2217	1	1	1	547.832	1093.65	2	1093.65	0.001	68	79	0	32.98	28	0.0038	K	ALLLAGPPGTGK	T
1	RBR1	NGSrhino	Q Exactive	242	yes	AT3G04920	Symbols: | Ribosomal protein S24e family protein | chr3:1360989-1362065 FORWARD LENGTH=133	84	15363	2	2	19.5	133	3917	1	1	1	427.576	1279.7	3	1279.7	0.0013	23	33	0	41.43	33	0.0015	K	QFVIDVLHPGR	A
1	RBR1	NGSrhino	Q Exactive	242	yes	AT3G04920	Symbols: | Ribosomal protein S24e family protein | chr3:1360989-1362065 FORWARD LENGTH=133	84	15363	2	2	19.5	133	6111	1	1	1	787.388	1572.76	2	1572.77	-0.0068	71	85	0	65.55	36	1.2e-05	K	SSGFGLIYDTVESAK	K
1	RBR1	NGSrhino	Q Exactive	243	yes	AT1G07660	Symbols: | Histone superfamily protein | chr1:2369212-2369523 FORWARD LENGTH=103	83	11402	3	3	27.2	103	1541	1	1	1	502.301	1002.59	2	1002.59	0.0013	61	68	0	46.31	33	0.00051	K	IFLENVIR	D
1	RBR1	NGSrhino	Q Exactive	243	yes	AT1G07660	Symbols: | Histone superfamily protein | chr1:2369212-2369523 FORWARD LENGTH=103	83	11402	3	3	27.2	103	2826	1	1	1	581.778	1161.54	2	1161.54	0.0004	69	78	0	57.86	36	6.8e-05	R	DAVTYTEHAR	R
1	RBR1	NGSrhino	Q Exactive	243	yes	AT1G07660	Symbols: | Histone superfamily protein | chr1:2369212-2369523 FORWARD LENGTH=103	83	11402	3	3	27.2	103	2979	1	1	1	590.815	1179.62	2	1179.61	0.0023	47	56	0	40.51	36	0.0037	R	ISGLIYEETR	G
1	RBR1	NGSrhino	Q Exactive	244	yes	AT2G35630	Symbols: MOR1, GEM1 | ARM repeat superfamily protein | chr2:14966828-14980361 FORWARD LENGTH=1978	82	217413	2	2	1.5	1978	1606	1	1	1	506.781	1011.55	2	1011.55	0.0003	546	555	1	42.38	33	0.0013	K	RPAPSAQASK	K
1	RBR1	NGSrhino	Q Exactive	244	yes	AT2G35630	Symbols: MOR1, GEM1 | ARM repeat superfamily protein | chr2:14966828-14980361 FORWARD LENGTH=1978	82	217413	2	2	1.5	1978	8830	1	1	1	665.683	1994.03	3	1994.02	0.0091	145	163	0	63.42	35	1.4e-05	K	AVVPAVDVMFQALSEFGSK	V
1	RBR1	NGSrhino	Q Exactive	245	yes	AT5G12470	Symbols: | Protein of unknown function (DUF3411) | chr5:4044950-4047290 REVERSE LENGTH=386	81	41297	2	2	5.4	386	2619	1	1	1	568.805	1135.6	2	1135.59	0.001	162	171	0	64.21	37	2e-05	R	LLADDLFMAK	L
1	RBR1	NGSrhino	Q Exactive	245	yes	AT5G12470	Symbols: | Protein of unknown function (DUF3411) | chr5:4044950-4047290 REVERSE LENGTH=386	81	41297	2	2	5.4	386	3157	1	1	1	601.32	1200.63	2	1200.62	0.0026	111	121	0	46.65	36	0.00097	K	ESGIELESLPK	D
1	RBR1	NGSrhino	Q Exactive	246	yes	AT2G02790	Symbols: IQD29 | IQ-domain 29 | chr2:788708-790946 FORWARD LENGTH=636	80	69719	2	2	3.9	636	2170	1	1	1	545.793	1089.57	2	1089.57	0.0054	172	181	0	43.84	37	0.0022	R	SSETVAQLQK	T
1	RBR1	NGSrhino	Q Exactive	246	yes	AT2G02790	Symbols: IQD29 | IQ-domain 29 | chr2:788708-790946 FORWARD LENGTH=636	80	69719	2	2	3.9	636	6972	1	1	1	853.896	1705.78	2	1705.78	-0.0001	493	507	0	58.33	35	5.2e-05	K	IENHHQDDGLTQSGR	K
1	RBR1	NGSrhino	Q Exactive	247	yes	AT5G15530	Symbols: BCCP2, CAC1-B | biotin carboxyl carrier protein 2 | chr5:5038955-5040437 FORWARD LENGTH=255	77	27262	2	2	15.3	255	4086	1	1	1	435.898	1304.67	3	1304.67	-0.0002	170	182	0	38.72	37	0.0075	K	PTSAPSSSHPPLK	S
1	RBR1	NGSrhino	Q Exactive	247	yes	AT5G15530	Symbols: BCCP2, CAC1-B | biotin carboxyl carrier protein 2 | chr5:5038955-5040437 FORWARD LENGTH=255	77	27262	2	2	15.3	255	11765	1	1	1	900.809	2699.41	3	2698.41	0.9922	230	255	1	62.76	32	1e-05	K	SGTIMELLAEDGKPVSVDTPLFVIAP	-
1	RBR1	NGSrhino	Q Exactive	248	yes	AT3G04230	Symbols: | Ribosomal protein S5 domain 2-like superfamily protein | chr3:1113169-1113609 REVERSE LENGTH=146	77	16576	2	2	12.3	146	647	1	1	0	442.764	883.514	2	883.513	0.0008	118	125	0	43.61	30	0.00052	R	TLLVADPR	R
1	RBR1	NGSrhino	Q Exactive	248	yes	AT3G04230	Symbols: | Ribosomal protein S5 domain 2-like superfamily protein | chr3:1113169-1113609 REVERSE LENGTH=146	77	16576	2	2	12.3	146	2556	1	1	1	564.856	1127.7	2	1127.7	0.0028	51	60	0	61.2	26	3.7e-06	K	IFEPVLLLGK	H
1	RBR1	NGSrhino	Q Exactive	249	yes	AT5G67630	Symbols: | P-loop containing nucleoside triphosphate hydrolases superfamily protein | chr5:26967535-26969306 REVERSE LENGTH=469	76	52081	2	2	5.3	469	2149	1	1	1	543.794	1085.57	2	1085.57	0.0021	417	425	0	53.26	34	0.00015	K	VVEVEDIQR	V
1	RBR1	NGSrhino	Q Exactive	249	yes	AT5G67630	Symbols: | P-loop containing nucleoside triphosphate hydrolases superfamily protein | chr5:26967535-26969306 REVERSE LENGTH=469	76	52081	2	2	5.3	469	7257	1	1	1	878.967	1755.92	2	1755.92	0.001	312	327	0	51.69	34	0.00021	R	ALENEMSPILVVATNR	G
1	RBR1	NGSrhino	Q Exactive	250	yes	AT3G08530	Symbols: | Clathrin, heavy chain | chr3:2587171-2595411 REVERSE LENGTH=1703	75	193148	3	3	2.2	1703	111	1	1	1	407.742	813.47	2	813.471	-0.0006	451	457	0	37.24	32	0.0033	R	LVVNQNK	K
1	RBR1	NGSrhino	Q Exactive	250	yes	AT3G08530	Symbols: | Clathrin, heavy chain | chr3:2587171-2595411 REVERSE LENGTH=1703	75	193148	3	3	2.2	1703	4344	1	1	1	672.845	1343.67	2	1343.67	0.0026	459	469	0	56.75	36	0.0001	K	NLLENWLAEDK	L
1	RBR1	NGSrhino	Q Exactive	250	yes	AT3G08530	Symbols: | Clathrin, heavy chain | chr3:2587171-2595411 REVERSE LENGTH=1703	75	193148	3	3	2.2	1703	9482	1	1	1	704.038	2109.09	3	2109.09	0.0061	84	102	0	41.19	34	0.0024	K	AQVPGTTQDHLQIFNIEAK	A
1	RBR1	NGSrhino	Q Exactive	251	yes	AT5G49830	Symbols: EXO84B | exocyst complex component 84B | chr5:20250803-20254766 REVERSE LENGTH=752	74	82697	2	2	3.3	752	1539	1	1	1	502.253	1002.49	2	1002.49	0.0036	399	407	0	47.27	36	0.00077	R	HASTAFQNK	L
1	RBR1	NGSrhino	Q Exactive	251	yes	AT5G49830	Symbols: EXO84B | exocyst complex component 84B | chr5:20250803-20254766 REVERSE LENGTH=752	74	82697	2	2	3.3	752	8063	1	1	1	628.649	1882.93	3	1882.92	0.0042	143	158	0	52.91	36	0.00023	K	WATEFPDHLDALLAER	R
1	RBR1	NGSrhino	Q Exactive	252	yes	AT5G15520	Symbols: | Ribosomal protein S19e family protein | chr5:5037242-5038136 REVERSE LENGTH=143	72	15807	2	2	13.3	143	554	1	1	1	437.226	872.437	2	872.435	0.0014	131	138	0	47.76	34	0.00048	R	DLDQVAGR	I
1	RBR1	NGSrhino	Q Exactive	252	yes	AT5G15520	Symbols: | Ribosomal protein S19e family protein | chr5:5037242-5038136 REVERSE LENGTH=143	72	15807	2	2	13.3	143	4233	1	1	1	663.889	1325.76	2	1325.76	0.0045	29	39	0	56.54	30	2.7e-05	K	IELPLWTDIVK	T
1	RBR1	NGSrhino	Q Exactive	253	yes	AT5G26360	Symbols: | TCP-1/cpn60 chaperonin family protein | chr5:9255561-9258891 REVERSE LENGTH=555	72	60301	2	2	4.1	555	2169	1	1	1	545.791	1089.57	2	1089.57	0.0003	20	29	0	39.75	37	0.0056	K	VHHGNIQASK	A
1	RBR1	NGSrhino	Q Exactive	253	yes	AT5G26360	Symbols: | TCP-1/cpn60 chaperonin family protein | chr5:9255561-9258891 REVERSE LENGTH=555	72	60301	2	2	4.1	555	5191	1	1	1	726.399	1450.78	2	1450.79	-0.0013	1	13	0	55.25	33	6.9e-05	-	MHAPVLVLSDSLK	R	Acetyl (Protein N-term)	1.0000000000000.0
1	RBR1	NGSrhino	Q Exactive	254	yes	AT1G16890	Symbols: UBC36, UBC13B | ubiquitin-conjugating enzyme 36 | chr1:5776550-5777903 REVERSE LENGTH=120	71	13622	2	2	33.3	120	7206	1	1	1	874.456	1746.9	2	1746.89	0.0069	23	37	0	45.85	36	0.0011	K	LELFLPEEYPMAAPK	V
1	RBR1	NGSrhino	Q Exactive	254	yes	AT1G16890	Symbols: UBC36, UBC13B | ubiquitin-conjugating enzyme 36 | chr1:5776550-5777903 REVERSE LENGTH=120	71	13622	2	2	33.3	120	11627	1	1	1	874.147	2619.42	3	2618.42	1.0013	72	96	0	47.21	30	0.00019	R	TVLLSIQALLSAPNPDDPLSENIAK	H
1	RBR1	NGSrhino	Q Exactive	255	yes	AT1G02780	Symbols: emb2386 | Ribosomal protein L19e family protein | chr1:608120-609391 REVERSE LENGTH=214	71	24591	2	2	7.9	214	1167	1	1	1	478.765	955.516	2	955.516	0.0001	137	144	0	41.79	33	0.0017	R	VLMESIHK	S
1	RBR1	NGSrhino	Q Exactive	255	yes	AT1G02780	Symbols: emb2386 | Ribosomal protein L19e family protein | chr1:608120-609391 REVERSE LENGTH=214	71	24591	2	2	7.9	214	1802	1	1	1	519.759	1037.5	2	1037.5	0.0003	154	162	0	51.57	36	0.00029	K	TLSDQFEAK	R
1	RBR1	NGSrhino	Q Exactive	256	yes	AT1G04480	Symbols: | Ribosomal protein L14p/L23e family protein | chr1:1216110-1217257 FORWARD LENGTH=140	69	15017	2	2	11.4	140	496	1	1	1	433.796	865.576	2	865.575	0.0014	76	83	0	49.19	20	1.2e-05	K	VLPAVIVR	Q
1	RBR1	NGSrhino	Q Exactive	256	yes	AT1G04480	Symbols: | Ribosomal protein L14p/L23e family protein | chr1:1216110-1217257 FORWARD LENGTH=140	69	15017	2	2	11.4	140	1118	1	1	1	475.29	948.566	2	948.564	0.0017	36	43	0	41.12	29	0.00075	K	NLYIISVK	G
1	RBR1	NGSrhino	Q Exactive	257	yes	AT1G50500	Symbols: HIT1, ATVPS53, VPS53 | Membrane trafficking VPS53 family protein | chr1:18708217-18715597 REVERSE LENGTH=828	68	92472	2	2	3.1	828	3929	1	1	1	642.324	1282.63	2	1282.63	0.003	378	389	0	45.71	36	0.0012	K	DLSVTGAGFNFR	G
1	RBR1	NGSrhino	Q Exactive	257	yes	AT1G50500	Symbols: HIT1, ATVPS53, VPS53 | Membrane trafficking VPS53 family protein | chr1:18708217-18715597 REVERSE LENGTH=828	68	92472	2	2	3.1	828	5973	1	1	1	774.92	1547.83	2	1547.82	0.0064	697	710	0	48.68	35	0.00044	K	VILSPIDSVADTYR	A
1	RBR1	NGSrhino	Q Exactive	258	yes	AT5G13280	Symbols: AK-LYS1, AK1, AK | aspartate kinase 1 | chr5:4249516-4252654 FORWARD LENGTH=569	67	62259	2	2	4.4	569	574	1	1	1	438.252	874.489	2	874.487	0.0013	281	289	0	48.62	37	0.00083	K	TGAVTTLGR	G
1	RBR1	NGSrhino	Q Exactive	258	yes	AT5G13280	Symbols: AK-LYS1, AK1, AK | aspartate kinase 1 | chr5:4249516-4252654 FORWARD LENGTH=569	67	62259	2	2	4.4	569	8419	1	1	1	651.008	1950	3	1949.99	0.0072	454	469	0	53.59	36	0.00017	R	ELIQQELDHVVEELEK	I
1	RBR1	NGSrhino	Q Exactive	259	yes	ATMG00510	Symbols: NAD7 | NADH dehydrogenase subunit 7 | chrM:132071-138153 FORWARD LENGTH=394	67	44549	2	2	5.8	394	2878	1	1	1	584.285	1166.56	2	1166.55	0.0023	216	225	0	42.31	36	0.0027	K	DWGFSGVMLR	G
1	RBR1	NGSrhino	Q Exactive	259	yes	ATMG00510	Symbols: NAD7 | NADH dehydrogenase subunit 7 | chrM:132071-138153 FORWARD LENGTH=394	67	44549	2	2	5.8	394	4342	1	1	1	672.382	1342.75	2	1342.75	0.0041	203	215	0	46.26	34	0.0006	R	LVDIGTVTAQQAK	D
1	RBR1	NGSrhino	Q Exactive	260	yes	AT3G15590	Symbols: | Tetratricopeptide repeat (TPR)-like superfamily protein | chr3:5275568-5277658 REVERSE LENGTH=610	65	69350	2	2	2.8	610	312	1	1	1	422.238	842.461	2	842.461	-0.0003	305	311	1	39.02	33	0.003	R	ENIKPSR	A
1	RBR1	NGSrhino	Q Exactive	260	yes	AT3G15590	Symbols: | Tetratricopeptide repeat (TPR)-like superfamily protein | chr3:5275568-5277658 REVERSE LENGTH=610	65	69350	2	2	2.8	610	3041	1	1	1	594.836	1187.66	2	1187.66	-0.0008	295	304	0	59.42	35	3.8e-05	K	ISDVLLLMER	E
1	RBR1	NGSrhino	Q Exactive	261	yes	AT2G29140	Symbols: APUM3, PUM3 | pumilio 3 | chr2:12531392-12535060 FORWARD LENGTH=964	62	105919	2	2	2	964	706	1	1	1	447.24	892.466	2	892.465	0.0007	856	863	0	54.6	36	0.00015	K	FASNVVEK	C
1	RBR1	NGSrhino	Q Exactive	261	yes	AT2G29140	Symbols: APUM3, PUM3 | pumilio 3 | chr2:12531392-12535060 FORWARD LENGTH=964	62	105919	2	2	2	964	3525	1	1	1	621.345	1240.68	2	1240.68	-0.0016	27	37	0	36.43	33	0.0055	K	EIGVLLGEQQR	R
1	RBR1	NGSrhino	Q Exactive	262	yes	AT2G09990	Symbols: | Ribosomal protein S5 domain 2-like superfamily protein | chr2:3781442-3781882 FORWARD LENGTH=146	62	16621	2	2	12.3	146	647	1	0	0	442.764	883.514	2	883.513	0.0008	118	125	0	43.61	30	0.00052	R	TLLVADPR	R
1	RBR1	NGSrhino	Q Exactive	262	yes	AT2G09990	Symbols: | Ribosomal protein S5 domain 2-like superfamily protein | chr2:3781442-3781882 FORWARD LENGTH=146	62	16621	2	2	12.3	146	2672	1	1	1	571.863	1141.71	2	1141.71	0.0011	51	60	0	45.92	26	0.00011	K	IFEPILLLGK	H
1	RBR1	NGSrhino	Q Exactive	263	yes	AT5G20600	Symbols: | FUNCTIONS IN: molecular_function unknown; INVOLVED IN: rRNA processing; LOCATED IN: preribosome, small subunit precursor; EXPRESSED IN: 22 plant structures; EXPRESSED DURING: 13 growth stages; CONTAINS InterPro DOMAIN/s: Nucleolar, Nop5	61	59952	2	2	3.9	532	2088	1	1	1	539.794	1077.57	2	1077.57	0.002	219	227	0	39.84	36	0.0044	K	SNLFDELLK	M
1	RBR1	NGSrhino	Q Exactive	263	yes	AT5G20600	Symbols: | FUNCTIONS IN: molecular_function unknown; INVOLVED IN: rRNA processing; LOCATED IN: preribosome, small subunit precursor; EXPRESSED IN: 22 plant structures; EXPRESSED DURING: 13 growth stages; CONTAINS InterPro DOMAIN/s: Nucleolar, Nop5	61	59952	2	2	3.9	532	4788	1	1	1	702.909	1403.8	2	1403.81	-0.0038	192	203	0	43.05	30	0.00055	K	EVLELLFAPFVK	I
1	RBR1	NGSrhino	Q Exactive	264	yes	AT4G11380	Symbols: | Adaptin family protein | chr4:6920608-6925444 FORWARD LENGTH=894	56	99309	2	2	3.1	894	3303	1	1	1	609.842	1217.67	2	1217.67	0.0039	350	359	0	38.31	35	0.005	R	NIDQVLLEFK	E
1	RBR1	NGSrhino	Q Exactive	264	yes	AT4G11380	Symbols: | Adaptin family protein | chr4:6920608-6925444 FORWARD LENGTH=894	56	99309	2	2	3.1	894	8297	1	1	1	965.035	1928.06	2	1927.05	1.0074	853	870	0	39.19	31	0.0018	R	DVPFLIELTAMVGQPGLK	C
1	RBR1	NGSrhino	Q Exactive	265	yes	AT5G25780	Symbols: EIF3B-2, EIF3B, ATEIF3B-2 | eukaryotic translation initiation factor 3B-2 | chr5:8973420-8976758 REVERSE LENGTH=714	51	82125	2	2	2.2	714	251	1	1	1	417.745	833.476	2	833.476	0.0001	201	207	1	37.67	35	0.0064	K	KPEPVHK	R
1	RBR1	NGSrhino	Q Exactive	265	yes	AT5G25780	Symbols: EIF3B-2, EIF3B, ATEIF3B-2 | eukaryotic translation initiation factor 3B-2 | chr5:8973420-8976758 REVERSE LENGTH=714	51	82125	2	2	2.2	714	1152	1	1	1	477.804	953.593	2	953.591	0.002	389	397	0	41.34	29	0.00059	K	VALVQIPSK	V
[truncated: 23,528 more rows]
