# Supplementary material for: The DREAM complex represses growth in response to DNA damage in Arabidopsis
Source: Life Sci Alliance. 2021 Sep 28;4(12):e202101141. doi: 10.26508/lsa.202101141 (PMC8500230; doi:10.26508/lsa.202101141)
Supplement: Supplementary file 3 [file LSA-2021-01141_TableS3.xlsx]

## Sheet: RBR1 p <= 0.001 FC >= 4
Prey proteins significantly enriched using RBR1-GFP as bait (adjusted p-value <= 0.001, FC >= 4)
AGI identifier	Gene names (primary)	log 2 (Bait/Control)	Adjusted P-value	Protein names	Gene names
At3g12280	RBR1	11.2	2.13e-11	Retinoblastoma-related 1	RBR1 ATRBR1 RB RB1 RBR RETINOBLASTOMA 1 RETINOBLASTOMA PROTEIN RETINOBLASTOMA-RELATED retinoblastoma-related 1 At3g12280
At5g22220	E2FB	5.68	8e-10	Transcription factor E2FB (E2F transcription factor-1) (AtE2F1)	E2FB E2F1 At5g22220 T6G21
At5g03415	DPB	5.31	6.2e-08	Transcription factor-like protein DPB (DP-like protein B) (AtDPbB) (E2F dimerization partner protein B)	DPB DP1 At5g03415 F12E4.160
At1g28060	RDM16	4.74	1.63e-07	Protein RDM16 (Pre-mRNA-splicing factor RDM16) (Protein RNA-directed DNA methylation 16)	RDM16 At1g28060 F13K9.16
At5g57120	MUL3.6	8.7	6.65e-07	AT5g57120/MUL3_6 (Nucleolar/coiled-body phosphoprotein)	MUL3.6 MUL3_6 At5g57120
At1g13440	GAPC2	3.46	9.34e-07	Glyceraldehyde-3-phosphate dehydrogenase GAPC2, cytosolic (EC 1.2.1.12) (NAD-dependent glyceraldehydephosphate dehydrogenase C subunit 2)	GAPC2 GAPDH At1g13440 T6J4.17
At3g05060	NOP5-2	6.9	1e-06	Probable nucleolar protein 5-2 (MAR-binding NOP56/58 homolog 2) (Nucleolar protein 58-2)	NOP5-2 NOP58-2 At3g05060 T12H1.2
At5g54640	RAT5	6.13	1.49e-06	Histone H2A.6 (HTA1) (Protein RESISTANT TO AGROBACTERIUM TRANSFORMATION 5)	RAT5 H2A-1 At5g54640 MRB17.14
At1g56110	NOP56	5.98	1.56e-06	At1g56110/T6H22_9 (NOP56-like pre RNA processing ribonucleoprotein) (NOP56-like protein) (Nucleolar protein) (SAR DNA binding protein, putative)	NOP56 NOP56-LIKE PROTEIN At1g56110 T6H22.10 T6H22_10
At1g56660		4.7	5.32e-06	F25P12.91 protein (MAEBL domain protein)	At1g56660 F25P12.91 F25P12_91
At5g40340	MPO12.6	4.81	6.86e-06	Tudor/PWWP/MBT superfamily protein	MPO12.6 MPO12_6 At5g40340
At3g57150	CBF5	4.12	1.16e-05	H/ACA ribonucleoprotein complex subunit 4 (EC 5.4.99.-) (CBF5 homolog) (Dyskerin) (Nopp-140-associated protein of 57 kDa homolog) (AtNAP57) (Nucleolar protein NAP57 homolog)	CBF5 NAP57 At3g57150 F24I3.230
At1g52760	CSE	2.95	2.57e-05	Caffeoylshikimate esterase (EC 3.1.1.-) (Lysophospholipase 2) (LysoPL2)	CSE At1g52760 F14G24.3
At2g41740	VLN2	4.67	3.94e-05	Villin-2	VLN2 At2g41740 T11A7.16
At1g31740	BGAL15	5.41	4.44e-05	Beta-galactosidase 15 (Lactase 15) (EC 3.2.1.23)	BGAL15 At1g31740 F27M3.5
At3g56050		6.27	4.72e-05	Probable inactive receptor-like protein kinase At3g56050	At3g56050 F18O21.10
At5g60030	MGO3.1	2.83	5.25e-05	Uncharacterized protein	MGO3.1 At5g60030
At1g69830	AMY3	4.39	5.56e-05	Alpha-amylase 3, chloroplastic (AtAMY3) (EC 3.2.1.1) (1,4-alpha-D-glucan glucanohydrolase)	AMY3 At1g69830 T17F3.14
At1g42550	PMI1	3.53	7.79e-05	Protein PLASTID MOVEMENT IMPAIRED 1	PMI1 At1g42550 F8D11.1 T8D8.2
At2g19520	MSI4	4.73	8.27e-05	WD-40 repeat-containing protein MSI4 (Altered cold-responsive gene 1 protein)	MSI4 ACG1 FVE At2g19520 F3P11.12
At5g52040	RS41	4.24	0.000126225	Serine/arginine-rich splicing factor RS41 (At-RSp41) (AtRS41)	RS41 RSP41 At5g52040 MSG15.12
At1g67680		4.59	0.000126968	Signal recognition particle subunit SRP72	At1g67680 F12A21.17 F12A21_17
At4g19410	PAE7	3.68	0.000139074	Pectin acetylesterase 7 (EC 3.1.1.-)	PAE7 At4g19410 T5K18.190
At3g25770	AOC2	3.96	0.000183675	Allene oxide cyclase 2, chloroplastic (EC 5.3.99.6)	AOC2 At3g25770 K13N2.11 K13N2_9
At1g44910	PRP40A	4.87	0.000196374	Pre-mRNA-processing protein 40A (AtPRP40a)	PRP40A MED35_1 MED35A At1g44910 F27F5.2 T12C22.20
At3g20330	PYRB	4.28	0.00019933	Aspartate carbamoyltransferase, chloroplastic (EC 2.1.3.2) (Aspartate transcarbamylase) (ATCase)	PYRB At3g20330 MQC12.7
At3g11730	RABD1	2.62	0.000228098	Ras-related protein RABD1 (AtRABD1) (Ras-related protein ATFP8)	RABD1 ATFP8 At3g11730 F26K24.2
At1g64550	ABCF3	2.49	0.000228098	ABC transporter F family member 3 (ABC transporter ABCF.3) (AtABCF3) (GCN20-type ATP-binding cassette protein GCN3)	ABCF3 GCN3 At1g64550 F1N19.11
At3g63540		3.57	0.000311572	Thylakoid lumenal 19 kDa protein, chloroplastic (P19)	At3g63540 TEL3S
At1g16030	HSP70-5	2.47	0.000311572	Heat shock 70 kDa protein 5 (Heat shock protein 70-5) (AtHsp70-5) (Heat shock protein 70b)	HSP70-5 HSP70B At1g16030 T24D18.14
At2g28900	OEP161	2.82	0.000312383	Outer envelope pore protein 16-1, chloroplastic (Chloroplastic outer envelope pore protein of 16 kDa 1) (AtOEP16-1) (OEP16-1) (Outer plastid envelope protein 16-L) (AtOEP16-L) (Leave outer plastid envelope protein 16) (Protochlorophyllide-dependent translocon protein 16) (Ptc16)	OEP161 PTC16 At2g28900 F8N16.19
At4g35770	SEN1	2.21	0.000312383	Rhodanese/Cell cycle control phosphatase superfamily protein	SEN1 ATSEN1 DARK INDUCIBLE 1 DIN1 SENESCENCE 1 SENESCENCE ASSOCIATED GENE 1 At4g35770 F4B14.3
At1g21130	IGMT4	4.21	0.000326944	Indole glucosinolate O-methyltransferase 4 (EC 2.1.1.-)	IGMT4 At1g21130 T22I11.4
At5g27120	NOP5-1	4.52	0.000336447	Probable nucleolar protein 5-1 (MAR-binding NOP56/58 homolog 1) (NOP58-like protein F108) (Nucleolar protein 58-1)	NOP5-1 NOP58-1 At5g27120 T21B4_30 TM021B04.12
At1g75280		3.1	0.000407097	Isoflavone reductase homolog P3 (EC 1.3.1.-)	At1g75280 F22H5.17
At1g77060		3.4	0.000497569	Carboxyvinyl-carboxyphosphonate phosphorylmutase, chloroplastic (EC 2.7.8.23) (Carboxyphosphonoenolpyruvate phosphonomutase) (CPEP phosphonomutase)	At1g77060 F22K20.14
At2g26250	FDH	3.55	0.000539325	3-ketoacyl-CoA synthase 10 (KCS-10) (EC 2.3.1.199) (Protein FIDDLEHEAD) (Very long-chain fatty acid condensing enzyme 10) (VLCFA condensing enzyme 10)	FDH EL4 KCS10 At2g26250 T1D16.11
At4g26230	RPL31B	4.49	0.000556402	60S ribosomal protein L31-2	RPL31B At4g26230 T25K17.40
At5g26742	emb1138	3.43	0.000589059	DEAD box RNA helicase (RH3)	emb1138 AtRH3 embryo defective 1138 RH3 At5g26742
At1g12900	GAPA2	2.24	0.000589059	Glyceraldehyde-3-phosphate dehydrogenase GAPA2, chloroplastic (EC 1.2.1.13) (NADP-dependent glyceraldehydephosphate dehydrogenase A subunit 2)	GAPA2 At1g12900 F13K23.15
At3g12110	ACT11	3.8	0.000627576	Actin-11	ACT11 At3g12110 T21B14.7 T21B14_108 T23B7.5
At2g21870		2.39	0.000724415	Probable ATP synthase 24 kDa subunit, mitochondrial	At2g21870 F7D8.19
At2g39770	CYT1	2.63	0.000744283	Mannose-1-phosphate guanylyltransferase 1 (EC 2.7.7.13) (GDP-mannose pyrophosphorylase 1) (Protein CYTOKINESIS DEFECTIVE 1) (Protein EMBRYO DEFECTIVE 101) (Protein HYPERSENSITIVE TO AMMONIUM ION 1) (Protein SENSITIVE TO OZONE 1) (Protein VITAMIN C DEFECTIVE 1)	CYT1 EMB101 GMP1 HSN1 SOZ1 VTC1 At2g39770 T5I7.7
At5g16150		3.03	0.000766	Plastidic glucose transporter 4 (AtpGlcT)	At5g16150 T21H19.70
At1g56190		3.47	0.000781577	Phosphoglycerate kinase (EC 2.7.2.3)	At1g56190 F14G9.19 F14G9_19
At5g42890	SCP2	4.21	0.000919361	Sterol carrier protein 2 (AtSCP2)	SCP2 At5g42890 MBD2.8
At3g15000	MORF8	3.46	0.000919361	Multiple organellar RNA editing factor 8, chloroplastic/mitochondrial (RNA editing-interacting protein 1)	MORF8 RIP1 At3g15000 K15M2.14
At4g24330		2.7	0.000919361	At4g24330	At4g24330 T22A6.160 T22A6_160
At3g15950	NAI2	2.1	0.00096324	TSA1-like protein (Protein NAI2)	NAI2 At3g15950 MVC8.9

## Sheet: E2FA p <= 0.01 FC >= 4
Prey proteins significantly enriched using E2FA-GFP as bait (adjusted p-value <= 0.01, FC >= 4)
AGI identifier	Gene names (primary)	log 2 (Bait/Control)	Adjusted P-value	Protein names	Gene names
At2g36010	E2FA	7.83	1.78398e-07	Transcription factor E2FA (E2F transcription factor-3) (AtE2F3)	E2FA E2F3 E2F4 At2g36010 F11F19.8
At5g03415	DPB	6.12	6.88413e-06	Transcription factor-like protein DPB (DP-like protein B) (AtDPbB) (E2F dimerization partner protein B)	DPB DP1 At5g03415 F12E4.160
At3g15356	LEC	2.79	0.00268327	Lectin-like protein LEC (AtLEC) (Ath.lec2)	LEC At3g15356 K7L4.17
At4g33150	LKR	3.15	0.00341672	Lysine-ketoglutarate reductase/saccharopine dehydrogenase bifunctional enzyme	LKR LYSINE-KETOGLUTARATE REDUCTASE SACCHAROPINE DEHYDROGENASE SDH At4g33150 F4I10.80 F4I10_80
At5g54640	RAT5	4.07	0.00341672	Histone H2A.6 (HTA1) (Protein RESISTANT TO AGROBACTERIUM TRANSFORMATION 5)	RAT5 H2A-1 At5g54640 MRB17.14
At3g12280	RBR1	3.65	0.00511122	Retinoblastoma-related 1	RBR1 ATRBR1 RB RB1 RBR RETINOBLASTOMA 1 RETINOBLASTOMA PROTEIN RETINOBLASTOMA-RELATED retinoblastoma-related 1 At3g12280
At5g20160		3.86	0.00511122	Ribonucloprotein	At5g20160 F5O24.50 F5O24_50
At1g75280		3.7	0.00511122	Isoflavone reductase homolog P3 (EC 1.3.1.-)	At1g75280 F22H5.17
At3g07590	SMD1A	4.5	0.00511122	Small nuclear ribonucleoprotein SmD1a (AtSmD1-a)	SMD1A At3g07590 MLP3.4
At3g05060	NOP5-2	2.43	0.0060503	Probable nucleolar protein 5-2 (MAR-binding NOP56/58 homolog 2) (Nucleolar protein 58-2)	NOP5-2 NOP58-2 At3g05060 T12H1.2
At5g55660	MDF20.10	2.6	0.0061101	DEK domain-containing chromatin associated protein	MDF20.10 MDF20_10 At5g55660
At2g05100	LHCB2.1	3.14	0.0061101	Chlorophyll a-b binding protein 2.1, chloroplastic (Photosystem II light harvesting complex gene 2.1) (Protein LIGHT-HARVESTING CHLOROPHYLL B-BINDING 2.1)	LHCB2.1 LHCB2.3 At2g05100 F15L11.2
AtMg00160	COX2	3.19	0.00643504	Cytochrome c oxidase subunit 2 (EC 7.1.1.9) (Cytochrome c oxidase polypeptide II)	COX2 COXII AtMg00160

## Sheet: E2FB p <= 0.001 FC >= 4
Prey proteins significantly enriched using E2FB-GFP as bait (adjusted p-value <= 0.001, FC >= 4)
AGI identifier	Gene names (primary)	log 2 (Bait/Control)	Adjusted P-value	Protein names	Gene names
At5g22220	E2FB	10.8	2.45483e-08	Transcription factor E2FB (E2F transcription factor-1) (AtE2F1)	E2FB E2F1 At5g22220 T6G21
At3g12280	RBR1	8	1.42509e-07	Retinoblastoma-related 1	RBR1 ATRBR1 RB RB1 RBR RETINOBLASTOMA 1 RETINOBLASTOMA PROTEIN RETINOBLASTOMA-RELATED retinoblastoma-related 1 At3g12280
At5g02470	DPA	7.11	9.2024e-07	Transcription factor-like protein DPA (DP-like protein A) (AtDPbA) (E2F dimerization partner protein A) (AtDP2a)	DPA DP2 DP2A At5g02470 T22P11.60
At2g41040		5.44	2.49607e-05	Uncharacterized methyltransferase At2g41040, chloroplastic (EC 2.1.1.-)	At2g41040 T3K9.19
At5g42850		6	6.38386e-05	Thioredoxin-like protein Clot (Thioredoxin Clot) (AtClot)	At5g42850 MBD2.4
At5g03415	DPB	6.52	9.09276e-05	Transcription factor-like protein DPB (DP-like protein B) (AtDPbB) (E2F dimerization partner protein B)	DPB DP1 At5g03415 F12E4.160
At5g12110		5.26	0.000158569	Elongation factor 1-beta 1 (EF-1-beta 1) (Elongation factor 1-beta' 1) (EF-1-beta' 1) (Elongation factor 1B-alpha 1) (eEF-1B alpha 1)	At5g12110 MXC9.7
AtCg00140	atpH	6.34	0.000192375	ATP synthase subunit c, chloroplastic (ATP synthase F(0) sector subunit c) (ATPase subunit III) (F-type ATPase subunit c) (F-ATPase subunit c) (Lipid-binding protein)	atpH AtCg00140
At5g13530	KEG	3.7	0.000298362	Protein kinasesubiquitin-protein ligase	KEG KEEP ON GOING At5g13530 T6I14.60 T6I14_60
At2g45250		4.21	0.000377277	Integral membrane hemolysin-III-like protein	At2g45250 F4L23.24
At5g05600	MOP10.14	5.61	0.000424191	2-oxoglutarate (2OG) and Fe(II)-dependent oxygenase superfamily protein	MOP10.14 MOP10_14 At5g05600
At1g21130	IGMT4	4.92	0.000448993	Indole glucosinolate O-methyltransferase 4 (EC 2.1.1.-)	IGMT4 At1g21130 T22I11.4
At3g10950	RPL37AB	4.12	0.000509256	Putative 60S ribosomal protein L37a-1	RPL37AB At3g10950 F9F8.23
At1g55020	LOX1	5.63	0.000554057	Linoleate 9S-lipoxygenase 1 (EC 1.13.11.58) (Lipoxygenase 1) (AtLOX1)	LOX1 At1g55020 F14C21.3 F14C21.54 T24C10.13
At2g45990		3.86	0.000554057	Ribosomal RNA small subunit methyltransferase G	At2g45990 F4I18.49
At4g32820	CABIN1	4.88	0.000562958	Tetratricopeptide repeat (TPR)-like superfamily protein	CABIN1 Calcineurin Binding protein 1 At4g32820 T16I18.30 T16I18_30
At4g29000	TCX5	3.59	0.000652855	Protein tesmin/TSO1-like CXC 5 (AtTCX5)	TCX5 At4g29000 F19B15.30
At5g58230	MSI1	4.57	0.000691669	Histone-binding protein MSI1 (CAF-1 p48 homolog) (Chromatin assembly factor 1 subunit MSI1) (CAF-1 subunit MSI1) (Protein MULTICOPY SUPPRESSOR OF IRA 1) (AtMSI1) (Protein medicis) (WD-40 repeat-containing protein MSI1)	MSI1 At5g58230 MCK7.10
At3g21430	ALY3	3.73	0.000696868	DNA binding protein	ALY3 ALWAYS EARLY 3 ATALY3 At3g21430
At3g05420	ACBP4	4.04	0.000708485	Acyl-CoA-binding domain-containing protein 4 (Acyl-CoA binding protein 4)	ACBP4 At3g05420 F22F7.13
At2g18040	PIN1	3.72	0.000708485	Peptidyl-prolyl cis-trans isomerase Pin1 (PPIase Pin1) (EC 5.2.1.8) (PIN1At) (Rotamase Pin1)	PIN1 At2g18040 T27K22.9
At3g15356	LEC	4.39	0.000726233	Lectin-like protein LEC (AtLEC) (Ath.lec2)	LEC At3g15356 K7L4.17
At4g30310		4.41	0.00075172	FGGY family of carbohydrate kinase	At4g30310 F17I23.350 F17I23_350
At3g52560	UEV1D	3.89	0.00075172	Ubiquitin-conjugating enzyme E2 variant 1D (Ubc enzyme variant 1D) (Protein MMS ZWEI HOMOLOG 4)	UEV1D MMZ4 At3g52560 F22O6.60
At5g42890	SCP2	4.17	0.00078023	Sterol carrier protein 2 (AtSCP2)	SCP2 At5g42890 MBD2.8
At1g24100	UGT74B1	3.28	0.00078023	UDP-glycosyltransferase 74B1 (N-hydroxythioamide S-beta-glucosyltransferase) (EC 2.4.1.195) (Thiohydroximate S-glucosyltransferase)	UGT74B1 At1g24100 F3I6.2
At3g48500	PTAC10	2.82	0.00078023	Protein PLASTID TRANSCRIPTIONALLY ACTIVE 10 (pTAC10) (Plastid-encoded RNA polymerase-associated protein 3) (PEP-associated protein 3) (Protein PIGMENT DEFECTIVE 312)	PTAC10 PAP3 PDE312 TAC10 At3g48500 T29H11_270 T8P19.10
At4g08520		5.99	0.00078096	Coatomer subunit zeta-3 (Zeta-3-coat protein) (Zeta-COP 3)	At4g08520 T15F16.12
At1g16820		5.45	0.00078096	Vacuolar ATP synthase catalytic subunit-related / V-ATPase-related / vacuolar proton pump-like protein	At1g16820 F17F16.15
At1g09200; At3g27360; At5g10390; At5g10400; At5g65360	HTR2; HTR3; HTR13; HTR9; HTR1	5.37	0.00078096	Histone H3.2 (Histone H3.1)	HTR2 At1g09200 T12M4.9; HTR3 At3g27360 K1G2.8; HTR13 At5g10390 F12B17_260; HTR9 At5g10400 F12B17_250; HTR1 At5g65360 MNA5.9
At5g48220	MIF21.11	3.18	0.00078096	Aldolase-type TIM barrel family protein	MIF21.11 MIF21_11 At5g48220
At3g05060	NOP5-2	3.95	0.000839756	Probable nucleolar protein 5-2 (MAR-binding NOP56/58 homolog 2) (Nucleolar protein 58-2)	NOP5-2 NOP58-2 At3g05060 T12H1.2
At4g15760	MO1	3.5	0.000855438	Monooxygenase 1 (AtMO1) (EC 1.14.13.-)	MO1 At4g15760 dl3920c FCAALL.376
At4g03110	BRN1	3.17	0.000884419	RNA-binding protein BRN1 (Protein BRUNO-LIKE 1) (AtBRN1) (Protein RNA-BINDING PROTEIN-DEFENSE RELATED 1) (AtRBP-DR1)	BRN1 RBP-DR1 At4g03110 F4C21.3 T4I9.1
At2g10940 At2g10940/F15K19.1		3.71	0.000939248	At2g10940/F15K19.1 (Bifunctional inhibitor/lipid-transfer protein/seed storage 2S albumin superfamily protein) (Expressed protein)	At2g10940 At2g10940/F15K19.1 F15K19.1 F15K19_1
At1g80070	PRP8A	2.92	0.000995678	Pre-mRNA-processing-splicing factor 8A (PRP8 homolog A) (AtPRP8A) (Protein ABNORMAL SUSPENSOR 2) (Protein EMBRYO DEFECTIVE 14) (Protein EMBRYO DEFECTIVE 177) (Protein EMBRYO DEFECTIVE 33) (Protein SUPPRESSOR OF OVEREXPRESSED FCA 81)	PRP8A EMB14 EMB177 EMB33 SOF81 SUS2 At1g80070 F18B13.15

## Sheet: E2FC p <= 0.05 FC >= 8
Prey proteins significantly enriched using E2FC-GFP as bait (adjusted p-value <= 0.05, FC >= 8)
AGI identifier	Gene names (primary)	log 2 (Bait/Control)	Adjusted P-value	Protein names	Gene names
At2g23350	PAB4	3.76	0.00225484	Polyadenylate-binding protein 4 (PABP-4) (Poly(A)-binding protein 4)	PAB4 At2g23350 T20D16.2
At5g64040	PSAN	7	6.77802e-06	Photosystem I reaction center subunit N, chloroplastic (PSI-N)	PSAN At5g64040 MHJ24.2
At1g06950	TIC110	4.38	0.00279007	Protein TIC110, chloroplastic (Translocon at the inner envelope membrane of chloroplasts 110) (AtTIC110)	TIC110 At1g06950 F10K1.33 F4H5.1
At5g03415	DPB	7.79	6.77802e-06	Transcription factor-like protein DPB (DP-like protein B) (AtDPbB) (E2F dimerization partner protein B)	DPB DP1 At5g03415 F12E4.160
At1g47870	ATE2F2	9.62	4.96276e-06	Winged-helix DNA-binding transcription factor family protein	ATE2F2 ATE2FC E2FC E2FC TRANSCRIPTION FACTOR TRANSCRIPTION FACTOR-2 E2F2 At1g47870 T2E6.2 T2E6_2
At5g22220	E2FB	7.3	1.16927e-05	Transcription factor E2FB (E2F transcription factor-1) (AtE2F1)	E2FB E2F1 At5g22220 T6G21
At3g57150	CBF5	5.15	0.00192189	H/ACA ribonucleoprotein complex subunit 4 (EC 5.4.99.-) (CBF5 homolog) (Dyskerin) (Nopp-140-associated protein of 57 kDa homolog) (AtNAP57) (Nucleolar protein NAP57 homolog)	CBF5 NAP57 At3g57150 F24I3.230
At3g12280	RBR1	8.27	4.96276e-06	Retinoblastoma-related 1	RBR1 ATRBR1 RB RB1 RBR RETINOBLASTOMA 1 RETINOBLASTOMA PROTEIN RETINOBLASTOMA-RELATED retinoblastoma-related 1 At3g12280
At1g54410	HIRD11	5.31	7.11028e-05	Dehydrin HIRD11 (Histidine-rich dehydrin of 11 kDa) (AtHIRD11) (Protein SRC1 homolog)	HIRD11 SRC1 At1g54410 F20D21.23
At3g21430	ALY3	4.33	0.00231601	DNA binding protein	ALY3 ALWAYS EARLY 3 ATALY3 At3g21430
At2g45250		3.13	0.00261392	Integral membrane hemolysin-III-like protein	At2g45250 F4L23.24
At4g32260	PDE334	3.96	0.00193769	AT4g32260/F10M6_100 (ATP synthase beta chain (Subunit II)) (EC 3.6.1.34) (ATPase, F0 complex, subunit B/B', bacterial/chloroplast) (H+-transporting ATP synthase chain 9-like protein) (H+-transporting ATP synthase chain9 - like protein)	PDE334 atpG PIGMENT DEFECTIVE 334 At4g32260 F10M6.100 F10M6_100
At1g74730		3.11	0.00225484	Transmembrane protein, putative (DUF1118)	At1g74730 F25A4.30 F25A4_30
At3g29075		6.21	4.64393e-05	Glycine-rich protein	At3g29075
At5g04640	T32M21_240	3.73	0.00261392	AGAMOUS-like 99 (MADS-box family protein) (MADS-box protein-like)	T32M21_240 AGAMOUS-like 99 AGL99 At5g04640 T1E3.5
At1g44910	PRP40A	4.02	0.0108275	Pre-mRNA-processing protein 40A (AtPRP40a)	PRP40A MED35_1 MED35A At1g44910 F27F5.2 T12C22.20
At5g41790	CIP1	6.87	0.0139772	COP1-interactive protein 1	CIP1 At5g41790 K16L22.7
At5g58230	MSI1	3.69	0.0100986	Histone-binding protein MSI1 (CAF-1 p48 homolog) (Chromatin assembly factor 1 subunit MSI1) (CAF-1 subunit MSI1) (Protein MULTICOPY SUPPRESSOR OF IRA 1) (AtMSI1) (Protein medicis) (WD-40 repeat-containing protein MSI1)	MSI1 At5g58230 MCK7.10
At2g30950	FTSH2	3.46	0.00819684	ATP-dependent zinc metalloprotease FTSH 2, chloroplastic (AtFTSH2) (EC 3.4.24.-) (Protein VARIEGATED 2)	FTSH2 VAR2 At2g30950 F7F1.16
At5g62190	RH7	3.28	0.0108275	DEAD-box ATP-dependent RNA helicase 7 (EC 3.6.4.13)	RH7 PRH75 At5g62190 MMI9.2
At5g18380		3.23	0.006456	Ribosomal protein S5 domain 2-like superfamily protein	At5g18380 F20L16.100 F20L16_100
At1g79200	SCI1	3.27	0.0207261	Style cell-cycle inhibitor 1 (AtSCI1)	SCI1 At1g79200 YUP8H12R.41
At1g60900	U2AF65B	3.1	0.0324358	Splicing factor U2af large subunit B (U2 auxiliary factor 65 kDa subunit B) (U2 small nuclear ribonucleoprotein auxiliary factor large subunit B) (U2 snRNP auxiliary factor large subunit B)	U2AF65B At1g60900 T7P1.5
At5g26742	RH3	3.34	0.0123261	DEAD-box ATP-dependent RNA helicase 3, chloroplastic (EC 3.6.4.13) (Protein EMBRYO DEFECTIVE 1138)	RH3 EMB1138 At5g26742 F21E10.1 T7I7.6
At5g65220	RPL29	3.34	0.00445632	50S ribosomal protein L29, chloroplastic (CL29)	RPL29 At5g65220 MQN23.16
At5g02470	DPA	3.72	0.00385256	Transcription factor-like protein DPA (DP-like protein A) (AtDPbA) (E2F dimerization partner protein A) (AtDP2a)	DPA DP2 DP2A At5g02470 T22P11.60
At3g56940	CRD1	3.39	0.00385953	Magnesium-protoporphyrin IX monomethyl ester [oxidative] cyclase, chloroplastic (Mg-protoporphyrin IX monomethyl ester oxidative cyclase) (EC 1.14.13.81) (Copper response defect 1 protein) (Dicarboxylate diiron protein) (AtZIP) (MPE-cyclase)	CRD1 ACSF AT103 CHL27 ZIP At3g56940 F24I3.20
At3g05060	NOP5-2	3.8	0.0056053	Probable nucleolar protein 5-2 (MAR-binding NOP56/58 homolog 2) (Nucleolar protein 58-2)	NOP5-2 NOP58-2 At3g05060 T12H1.2
At4g25080	CHLM	3.4	0.0205541	Magnesium protoporphyrin IX methyltransferase, chloroplastic (EC 2.1.1.11)	CHLM At4g25080 F13M23.220
At4g29000	TCX5	3.35	0.00385953	Protein tesmin/TSO1-like CXC 5 (AtTCX5)	TCX5 At4g29000 F19B15.30
At1g26550	T1K7.8	3.39	0.0149643	Peptidyl-prolyl cis-trans isomerase (EC 5.2.1.8)	T1K7.8 At1g26550 T1K7.8 T1K7_8
At1g56110	NOP56	3.48	0.00385953	At1g56110/T6H22_9 (NOP56-like pre RNA processing ribonucleoprotein) (NOP56-like protein) (Nucleolar protein) (SAR DNA binding protein, putative)	NOP56 NOP56-LIKE PROTEIN At1g56110 T6H22.10 T6H22_10
At2g04520		3.23	0.00749486	Nucleic acid-binding, OB-fold-like protein (Putative translation initiation factor eIF-1A)	At2g04520 T1O3.7 T1O3_7
