# Supplementary material for: The DREAM complex represses growth in response to DNA damage in Arabidopsis
Source: Life Sci Alliance. 2021 Sep 28;4(12):e202101141. doi: 10.26508/lsa.202101141 (PMC8500230; doi:10.26508/lsa.202101141)
Supplement: Supplementary file 4 [file LSA-2021-01141_TableS4.xlsx]

## Sheet: Meta_analysis_overview
182 IPs of Arabidopsis thaliana seelings expressing either RBR-GFP, E2FA-GFP, E2FB-GFP, E2FC-GFP, DPA-GFP, DPB-3xCFP or the control 35S-GFP. Column E: biological conditions control conditions = seeds germinated on 1/2 MS medium for 7 days under long day regime (16 hours of light and 8 hours of dark). 5 dag = same as control condition for 5 days after germination 14 dag = same as control condition…
	sample	name of Protein Prospector search	Bait	biological conditions	Instrument	Detection / fragmentation type
1	sample9	140325_23_PSzA_GFPyoung_ITMSms2cid/2019UP_spall2	negative control	5 dag	Orbitrap Elite	IT/CID
2	sample10	140325_24_PSzA_GFPold_ITMSms2cid/2019UP_spall	negative control	14 dag	Orbitrap Elite	IT/CID
3	sample23	141122_01_PSzA_GFP_ITMSms2cid/2019UP_spall	negative control	control	Orbitrap Elite	IT/CID
4	sample27	150921_01_PSzA_GFP_ITMSms2cid/2019UP_spall	negative control	control	Orbitrap Elite	IT/CID
5	sample32	151119_09_PSzA_GFP_ITMSms2cid/2019UP_spall	negative control	control	Orbitrap Elite	IT/CID
6	sample36	151123_09_PSzA_GFP_ITMSms2cid/2019UP_spall	negative control	control	Orbitrap Elite	IT/CID
7	sample50	160120_14__PSzA_GFP_treated_ITMSms2cid/2019UP_spall	negative control	AZD	Orbitrap Elite	IT/CID
8	sample51	160430_01_PSzA_GFP_ITMSms2cid/2019UP_spall	negative control	control	Orbitrap Elite	IT/CID
9	sample52	160430_02_PSzA_GFP_ITMSms2cid/2019UP_spall	negative control	control	Orbitrap Elite	IT/CID
10	sample53	160430_02_PSzA_GFP_ITMSms2cid/up2019_spall	negative control	control	Orbitrap Elite	IT/CID
11	sample64	160612_21_PSzA_GFP_ITMSms2cid/2019UP_spall	negative control	control	Orbitrap Elite	IT/CID
12	sample65	160612_22_PSzA_GFPt_ITMSms2cid/2019UP_spall	negative control	control	Orbitrap Elite	IT/CID
13	sample84	160815_01_PSzA_WT_2_ITMSms2cid/2019UP_spall	negative control	2% suc	Orbitrap Elite	IT/CID
14	sample85	160815_02_PSzA_WT_2_AZD_ITMSms2cid/2019UP_spall	negative control	AZD	Orbitrap Elite	IT/CID
15	sample88	160816_09_PSzA_WT_ITMSms2cid/2019UP_spall	negative control	control	Orbitrap Elite	IT/CID
16	sample89	160816_10_PSzA_WT_ITMSms2cid/2019UP_spall	negative control	control	Orbitrap Elite	IT/CID
17	sample110	160817_13_PSzA_WT_2_ITMSms2cid/2019UP_spall	negative control	2% suc	Orbitrap Elite	IT/CID
18	sample111	160817_14_PSzA_WT_2_AZD_ITMSms2cid/2019UP_spall	negative control	AZD	Orbitrap Elite	IT/CID
19	sample112	161001_05_PSzA_WT_ITMSms2cid/2019UP_spall	negative control	control	Orbitrap Elite	IT/CID
20	sample113	161001_06_PSzA_WT_treated_ITMSms2cid/2019UP_spall	negative control	AZD	Orbitrap Elite	IT/CID
21	sample122	170824_05_GFP2/2019	negative control	2% suc	Fusion-Lumos	IT/CID
22	sample123	170824_06_GFP_AZD/2019	negative control	AZD	Fusion-Lumos	IT/CID
23	sample136	170912_05_GFP_2/2019	negative control	2% suc	Fusion-Lumos	IT/CID
24	sample137	170912_06_GFP_AZD/2019	negative control	AZD	Fusion-Lumos	IT/CID
25	sample141	170912_34_GFP_0/2019	negative control	0% suc	Fusion-Lumos	IT/CID
26	sample148	180325_03_BL_RB_2-/2019UP_spall	negative control	2% suc	Fusion-Lumos	FT/HCD
27	sample149	180325_04_BL_RB_AZD-/2019UP_spall	negative control	2% suc	Fusion-Lumos	FT/HCD
28	sample150	180325_05_BL_RB_2-/2019UP_spall	negative control	0% suc	Fusion-Lumos	FT/HCD
29	sample151	180325_06_BL_RB_AZD-/2019UP_spall	negative control	AZD	Fusion-Lumos	FT/HCD
30	sample194	180607_01_BL_E3FB_01-/2019UP_spall	negative control	0% suc	Fusion-Lumos	FT/HCD
31	sample195	180607_02_BL_E3FB_21-/2019UP_spall	negative control	2% suc	Fusion-Lumos	FT/HCD
32	sample196	180607_03_BL_E3FB_A1-/2019UP_spall	negative control	control	Fusion-Lumos	FT/HCD
33	sample222	181003_40_E2FA_0%_-/2019UP_spall	negative control	0% suc	Fusion-Lumos	FT/HCD
34	sample223	181003_41_E2FA_2%_-/2019UP_spall	negative control	2% suc	Fusion-Lumos	FT/HCD
35	sample224	181003_42_E2FA_AZD_-/2019UP_spall	negative control	AZD	Fusion-Lumos	FT/HCD
36	sample225	181003_43_E2FB_AZD_1-/2019UP_spall	negative control	AZD	Fusion-Lumos	FT/HCD
37	sample226	181003_44_E2FB_AZD_2-/2019UP_spall	negative control	AZD	Fusion-Lumos	FT/HCD
38	sample246	181129_02_LL_305_GFP-/2019UP_spall	negative control	control	Fusion-Lumos	FT/HCD
39	sample247	190301_06_LL_noUV-/2019UP_spall	negative control	control	Fusion-Lumos	FT/HCD
40	sample248	190301_07_LL_UV-/2019UP_spall	negative control	control	Fusion-Lumos	FT/HCD
41	sample251	190515_01_BL_MZ_GFP1/2019UP_spall	negative control	control	Fusion-Lumos	FT/HCD
42	sample252	190515_02_BL_MZ_GFP2/2019UP_spall	negative control	control	Fusion-Lumos	FT/HCD
43	sample253	190515_03_BL_MZ_GFP3/2019UP_spall	negative control	control	Fusion-Lumos	FT/HCD
44	sample265	190817_05_BL_MT_GFP1-/up2019_spall	negative control	control	Fusion-Lumos	FT/HCD
45	sample266	190817_06_BL_MT_GFP2-/up2019_spall	negative control	control	Fusion-Lumos	FT/HCD
46	sample267	190817_07_BL_MT_GFP3-/up2019_spall	negative control	control	Fusion-Lumos	FT/HCD
47	sample268	191028_09_BL_MZ_GFP1-/up2019_Arath_spall	negative control	control	Fusion-Lumos	FT/HCD
48	sample269	191028_10_BL_MZ_GFP2-/up2019_Arath_spall	negative control	control	Fusion-Lumos	FT/HCD
49	sample275	191028_33_BL_MZ_GFP1/up2019_Arath_spall	negative control	control	Fusion-Lumos	FT/HCD
50	sample276	191028_34_BL_MZ_GFP2/up2019_Arath_spall	negative control	control	Fusion-Lumos	FT/HCD
51	sample5	140204_17_PSZA_E2FA_ITMSms2cid/2019UP_spall	E2FA	control	Orbitrap Elite	IT/CID
52	sample15	140506_3_PSzA_E2FC_dark_ITMSms2cid/2019UP_spall	E2FA	dark	Orbitrap Elite	IT/CID
53	sample16	140506_4_PSzA_E2FC_light_ITMSms2cid/2019UP_spall	E2FA	light	Orbitrap Elite	IT/CID
54	sample19	140507_psza_1_E2FAlight_ITMSms2cid/2019UP_spall	E2FA	light	Orbitrap Elite	IT/CID
55	sample20	140507_psza_2_E2FAdark_ITMSms2cid/2019UP_spall	E2FA	dark	Orbitrap Elite	IT/CID
56	sample35	151123_06_PSzA_E2FA_ITMSms2cid/2019UP_spall	E2FA	control	Orbitrap Elite	IT/CID
57	sample48	160120_10_PSzA_E2FA_ITMSms2cid/2019UP_spall	E2FA	control	Orbitrap Elite	IT/CID
58	sample49	160120_11__PSzA_E2FA_treated_ITMSms2cid/2019UP_spall	E2FA	AZD	Orbitrap Elite	IT/CID
59	sample58	160430_13_PSzA_E2FA_ITMSms2cid/2019UP_spall	E2FA	control	Orbitrap Elite	IT/CID
60	sample59	160430_14_PSzA_E2FA_ITMSms2cid/2019UP_spall	E2FA	control	Orbitrap Elite	IT/CID
61	sample68	160810_04_PSzA_E2FA_ITMSms2cid/2019UP_spall	E2FA	control	Orbitrap Elite	IT/CID
62	sample69	160810_05_PSzA_E2FA_ITMSms2cid/2019UP_spall	E2FA	control	Orbitrap Elite	IT/CID
63	sample76	160814_01_PSzA_E2FA_2_ITMSms2cid/2019UP_spall	E2FA	2% suc	Orbitrap Elite	IT/CID
64	sample77	160814_02_PSzA_E2FA_2_AZD_ITMSms2cid/2019UP_spall	E2FA	AZD	Orbitrap Elite	IT/CID
65	sample86	160816_05_PSzA_E2FA_ITMSms2cid/2019UP_spall	E2FA	control	Orbitrap Elite	IT/CID
66	sample87	160816_06_PSzA_E2FA_ITMSms2cid/2019UP_spall	E2FA	control	Orbitrap Elite	IT/CID
67	sample96	160816_30_PSzA_E2FA_2_ITMSms2cid/2019UP_spall	E2FA	2% suc	Orbitrap Elite	IT/CID
68	sample97	160816_31_PSzA_E2FA_2_AZD_ITMSms2cid/2019UP_spall	E2FA	AZD	Orbitrap Elite	IT/CID
69	sample119	170824_01_E2FA0/2019	E2FA	0% suc	Fusion-Lumos	IT/CID
70	sample120	170824_02_E2FA2/2019	E2FA	2% suc	Fusion-Lumos	IT/CID
71	sample121	170824_03_E2FA_AZD/2019	E2FA	AZD	Fusion-Lumos	IT/CID
72	sample131	170825_8_e2fb_E2FA1/2019UP_spall	E2FA	control	Fusion-Lumos	IT/CID
73	sample132	170825_9_e2fb_E2FA2/2019UP_spall	E2FA	control	Fusion-Lumos	IT/CID
74	sample133	170912_01_E2FA_0/2019	E2FA	0% suc	Fusion-Lumos	IT/CID
75	sample134	170912_02_E2FA_2/2019	E2FA	2% suc	Fusion-Lumos	IT/CID
76	sample135	170912_03_E2FA_AZD/2019	E2FA	AZD	Fusion-Lumos	IT/CID
77	sample145	170913_3_e2fb_E2FA1/2019	E2FA	control	Fusion-Lumos	IT/CID
78	sample146	170913_5_e2fb_E2FA2/2019UP_spall	E2FA	2% suc	Fusion-Lumos	IT/CID
79	sample205	180612_06_BL_E2FA_02/2019UP_spall	E2FA	0% suc	Fusion-Lumos	FT/HCD
80	sample206	180612_07_BL_E2FA_22/2019UP_spall	E2FA	2% suc	Fusion-Lumos	FT/HCD
81	sample207	180612_08_BL_E2FA_A2/2019UP_spall	E2FA	control	Fusion-Lumos	FT/HCD
82	sample215	181003_25_E2FA_0%_+/2019	E2FA	0% suc	Fusion-Lumos	FT/HCD
83	sample216	181003_25_E2FA_0%_2/2019UP_spall	E2FA	0% suc	Fusion-Lumos	FT/HCD
84	sample217	181003_26_E2FA_2%_2/2019UP_spall	E2FA	2% suc	Fusion-Lumos	FT/HCD
85	sample218	181003_27_E2FA_AZD_2/2019UP_spall	E2FA	AZD	Fusion-Lumos	FT/HCD
86	sample4	140127_psza5_e2fb_ITMSms2cid/2019UP_spall	E2FB	control	Orbitrap Elite	IT/CID
87	sample6	140204_20_PSZA_E2FB_ITMSms2cid/2019UP_spall	E2FB	control	Orbitrap Elite	IT/CID
88	sample11	140325_27_PSzA_E2FByoung_ITMSms2cid/2019UP_spall	E2FB	5 dag	Orbitrap Elite	IT/CID
89	sample12	140325_28_PSzA_E2FBold_ITMSms2cid/2019UP_spall	E2FB	14 dag	Orbitrap Elite	IT/CID
90	sample25	141122_03_PSzA_E2FB_ITMSms2cid/up2019_Arath_spall2	E2FB	control	Orbitrap Elite	IT/CID
91	sample37	151123_12_PSzA_E2FB_ITMSms2cid/2019UP_spall	E2FB	control	Orbitrap Elite	IT/CID
92	sample42	160109_01_PSzA_E2FB_10ul_ITMSms2cid/2019UP_spall	E2FB	control	Orbitrap Elite	IT/CID
93	sample43	160109_02_PSzA_E2FB_40ul_ITMSms2cid/2019UP_spall	E2FB	control	Orbitrap Elite	IT/CID
94	sample45	160109_06_PSzA_E2FB_Coli_40ul_ITMSms2cid/2019UP_spall	E2FB	control	Orbitrap Elite	IT/CID
95	sample60	160430_17_PSzA_E2FB_ITMSms2cid/2019UP_spall	E2FB	control	Orbitrap Elite	IT/CID
96	sample61	160430_18_PSzA_E2FB_ITMSms2cid/2019UP_spall	E2FB	control	Orbitrap Elite	IT/CID
97	sample66	160612_25_PSzA_E2FB_ITMSms2cid/2019UP_spall	E2FB	control	Orbitrap Elite	IT/CID
98	sample74	160810_22_PSzA_E2FB_ITMSms2cid/2019UP_spall	E2FB	control	Orbitrap Elite	IT/CID
99	sample75	160810_23_PSzA_E2FB_ITMSms2cid/2019UP_spall	E2FB	control	Orbitrap Elite	IT/CID
100	sample78	160814_05_PSzA_E2FB_2_ITMSms2cid/2019UP_spall	E2FB	control	Orbitrap Elite	IT/CID
101	sample79	160814_06_PSzA_E2FB_2_AZD_ITMSms2cid/2019UP_spall	E2FB	AZD	Orbitrap Elite	IT/CID
102	sample92	160816_17_PSzA_E2FB_ITMSms2cid/2019UP_spall	E2FB	control	Orbitrap Elite	IT/CID
103	sample93	160816_18_PSzA_E2FB_ITMSms2cid/2019UP_spall	E2FB	control	Orbitrap Elite	IT/CID
104	sample99	160817_01i_PSzA_E2FB_2_ITMSms2cid/2019UP_spall	E2FB	control	Orbitrap Elite	IT/CID
105	sample101	160817_02i_PSzA_E2FB_2_AZD_ITMSms2cid/2019UP_spall	E2FB	AZD	Orbitrap Elite	IT/CID
106	sample124	170824_08_E2FB0/2019	E2FB	0% suc	Fusion-Lumos	IT/CID
107	sample125	170824_09_E2FB2/2019	E2FB	2% suc	Fusion-Lumos	IT/CID
108	sample126	170824_10_E2FB_AZD/2019	E2FB	AZD	Fusion-Lumos	IT/CID
109	sample130	170825_11_e2fa_E2FAB/2019UP_spall	E2FB	control	Fusion-Lumos	IT/CID
110	sample138	170912_08_E2FB_0/2019	E2FB	0% suc	Fusion-Lumos	IT/CID
111	sample139	170912_09_E2FB_2/2019	E2FB	2% suc	Fusion-Lumos	IT/CID
112	sample140	170912_10_E2FB_AZD/2019	E2FB	AZD	Fusion-Lumos	IT/CID
113	sample147	170913_8_e2fA_E2Fb/2019UP_spall	E2FB	control	Fusion-Lumos	IT/CID
114	sample202	180612_01_BL_E2FB_03/2019UP_spall	E2FB	0% suc	Fusion-Lumos	FT/HCD
115	sample203	180612_02_BL_E2FB_23/2019UP_spall	E2FB	2% suc	Fusion-Lumos	FT/HCD
116	sample204	180612_03_BL_E2FB_A3/2019UP_spall	E2FB	AZD	Fusion-Lumos	FT/HCD
117	sample219	181003_30_E2FB_0%_2/2019UP_spall	E2FB	0% suc	Fusion-Lumos	FT/HCD
118	sample220	181003_31_E2FB_2%_2/2019UP_spall	E2FB	2% suc	Fusion-Lumos	FT/HCD
119	sample221	181003_32_E2FB_AZD_2/2019UP_spall	E2FB	AZD	Fusion-Lumos	FT/HCD
120	sample241	181003_63_E2FB_AZD_6/2019UP_spall	E2FB	AZD	Fusion-Lumos	FT/HCD
121	sample280	200124_06_MZ_E2FB_5dag+/up2019_Arath_spall	E2FB	control	Fusion-Lumos	FT/HCD
122	sample282	200124_13_MZ_E2FB_14dag+/up2019_Arath_spall	E2FB	14 dag	Fusion-Lumos	FT/HCD
123	sample284	200213_09_BL_MZ_E2FB_B-Per+/up2019_Arath	E2FB	control	Fusion-Lumos	FT/HCD
124	sample285	200213_19_BL_MZ_E2FB_5dag_memb+/up2019_Arath_spall	E2FB	5 dag	Fusion-Lumos	FT/HCD
125	sample7	140204_23_PSZA_E2FC_ITMSms2cid/2019UP_spall	E2FC	control	Orbitrap Elite	IT/CID
126	sample13	140325_29_PSzA_E2FCyoung_ITMSms2cid/2019UP_spall	E2FC	5 dag	Orbitrap Elite	IT/CID
127	sample14	140325_30_PSzA_E2FCold_ITMSms2cid/2019UP_spall	E2FC	14 dag	Orbitrap Elite	IT/CID
128	sample17	140506_7_PSzA_E2FA_dark_ITMSms2cid/2019UP_spall	E2FC	dark	Orbitrap Elite	IT/CID
129	sample21	140507_psza_3_E2FClight_ITMSms2cid/2019UP_spall	E2FC	light	Orbitrap Elite	IT/CID
130	sample22	140507_psza_4_E2FCdark_ITMSms2cid/2019UP_spall	E2FC	dark	Orbitrap Elite	IT/CID
131	sample34	151123_03_PSzA_E2FC_ITMSms2cid/2019UP_spall	E2FC	control	Orbitrap Elite	IT/CID
132	sample62	160430_21_PSzA_E2FC_ITMSms2cid/2019UP_spall	E2FC	control	Orbitrap Elite	IT/CID
133	sample63	160430_22_PSzA_E2FC_ITMSms2cid/2019UP_spall	E2FC	control	Orbitrap Elite	IT/CID
134	sample72	160810_18_PSzA_E2FC_ITMSms2cid/2019UP_spall	E2FC	control	Orbitrap Elite	IT/CID
135	sample73	160810_19_PSzA_E2FC_ITMSms2cid/2019UP_spall	E2FC	control	Orbitrap Elite	IT/CID
136	sample80	160814_09_PSzA_E2FC_2_ITMSms2cid/2019UP_spall	E2FC	2% suc	Orbitrap Elite	IT/CID
137	sample81	160814_10_PSzA_E2FC_2_AZD_ITMSms2cid/2019UP_spall	E2FC	2% suc	Orbitrap Elite	IT/CID
138	sample90	160816_13_PSzA_E2FC_ITMSms2cid/2019UP_spall	E2FC	control	Orbitrap Elite	IT/CID
139	sample91	160816_14_PSzA_E2FC_ITMSms2cid/2019UP_spall	E2FC	control	Orbitrap Elite	IT/CID
140	sample103	160817_05i_PSzA_E2FC_2_ITMSms2cid/2019UP_spall	E2FC	2% suc	Orbitrap Elite	IT/CID
141	sample105	160817_06i_PSzA_E2FC_2_AZD_ITMSms2cid/2019UP_spall	E2FC	AZD	Orbitrap Elite	IT/CID
142	sample277	191028_35_BL_MZ_E2FC1/up2019_Arath_spall	E2FC	control	Fusion-Lumos	FT/HCD
143	sample278	191028_36_BL_MZ_E2FC2/up2019_Arath_spall	E2FC	control	Fusion-Lumos	FT/HCD
144	sample279	191028_37_BL_MZ_E2FC3/up2019_Arath_spall	E2FC	control	Fusion-Lumos	FT/HCD
145	sample8	140204_26_PSZA_RB_ITMSms2cid/2019UP_spall	RBR1	control	Orbitrap Elite	IT/CID
146	sample70	160810_11_PSzA_Rb_ITMSms2cid/2019UP_spall	RBR1	control	Orbitrap Elite	IT/CID
147	sample71	160810_12_PSzA_Rb_ITMSms2cid/2019UP_spall	RBR1	control	Orbitrap Elite	IT/CID
148	sample82	160814_13_PSzA_Rb_2_ITMSms2cid/2019UP_spall	RBR1	2% suc	Orbitrap Elite	IT/CID
149	sample83	160814_14_PSzA_Rb_2_AZD_ITMSms2cid/2019UP_spall	RBR1	AZD	Orbitrap Elite	IT/CID
150	sample94	160816_21_PSzA_Rb_ITMSms2cid/2019UP_spall	RBR1	control	Orbitrap Elite	IT/CID
151	sample95	160816_22_PSzA_Rb_ITMSms2cid/2019UP_spall	RBR1	control	Orbitrap Elite	IT/CID
152	sample107	160817_09i_PSzA_Rb_2_ITMSms2cid/2019UP_spall	RBR1	2% suc	Orbitrap Elite	IT/CID
153	sample109	160817_10i_PSzA_Rb_2_AZD_ITMSms2cid/2019UP_spall	RBR1	AZD	Orbitrap Elite	IT/CID
154	sample127	170824_12_RBR1_0/2019UP_spall	RBR1	0% suc	Fusion-Lumos	IT/CID
155	sample128	170824_13_RBR1_2/2019UP_spall	RBR1	2% suc	Fusion-Lumos	IT/CID
156	sample129	170824_14_RBR1_AZD/2019UP_spall	RBR1	AZD	Fusion-Lumos	IT/CID
157	sample142	170912_36_RBR1_0/2019UP_spall	RBR1	0% suc	Fusion-Lumos	IT/CID
158	sample143	170912_37_RBR1_2/2019UP_spall	RBR1	2% suc	Fusion-Lumos	IT/CID
159	sample144	170912_38_RBR1_AZD/2019UP_spall	RBR1	AZD	Fusion-Lumos	IT/CID
160	sample163	180327_043_BL_RB_0_2/2019UP_spall	RBR1	0% suc	Fusion-Lumos	FT/HCD
161	sample164	180327_05_BL_RB_AZD_1/2019UP_spall	RBR1	2% suc	Fusion-Lumos	FT/HCD
162	sample165	180327_06_BL_RB_AZD_2/2019UP_spall	RBR1	AZD	Fusion-Lumos	FT/HCD
163	sample166	180327_07_BL_RB_2_1/2019UP_spall	RBR1	2% suc	Fusion-Lumos	FT/HCD
164	sample167	180327_08_BL_RB_2_2/2019UP_spall	RBR1	2% suc	Fusion-Lumos	FT/HCD
165	sample168	180328_01_BL_RB_0_1/2019UP_spall	RBR1	0% suc	Fusion-Lumos	FT/HCD
166	sample169	180328_02_BL_RB_0_2/2019UP_spall	RBR1	0% suc	Fusion-Lumos	FT/HCD
167	sample170	180328_05_BL_RB_AZD_1/2019UP_spall	RBR1	AZD	Fusion-Lumos	FT/HCD
168	sample171	180328_06_BL_RB_AZD_2/2019UP_spall	RBR1	AZD	Fusion-Lumos	FT/HCD
169	sample172	180328_09_BL_RB_2_1/2019UP_spall	RBR1	2% suc	Fusion-Lumos	FT/HCD
170	sample173	180328_10_BL_RB_2_2/2019UP_spall	RBR1	2% suc	Fusion-Lumos	FT/HCD
171	sample208	180612_11_BL_RBR1_04/2019UP_spall	RBR1	0% suc	Fusion-Lumos	FT/HCD
172	sample209	180612_12_BL_RBR1_24/2019UP_spall	RBR1	2% suc	Fusion-Lumos	FT/HCD
173	sample210	180612_13_BL_RBR1_A4/2019UP_spall	RBR1	AZD	Fusion-Lumos	FT/HCD
174	sample211	180613_01_BL_RBR1_05/2019UP_spall	RBR1	0% suc	Fusion-Lumos	FT/HCD
175	sample212	180613_02_BL_RBR1_25/2019UP_spall	RBR1	2% suc	Fusion-Lumos	FT/HCD
176	sample214	180614_10_BL_RBR1_06/2019UP_spall	RBR1	0% suc	Fusion-Lumos	FT/HCD
177	sample31	151119_03_PSzA_DPA_ITMSms2cid/2019UP_spall	DPA	control	Orbitrap Elite	IT/CID
178	sample54	160430_05_PSzA_DPA_ITMSms2cid/2019UP_spall	DPA	control	Orbitrap Elite	IT/CID
179	sample55	160430_06_PSzA_DPA_ITMSms2cid/2019UP_spall	DPA	control	Orbitrap Elite	IT/CID
180	sample33	151119_12_PSzA_DPB_ITMSms2cid/2019UP_spall	DPB	control	Orbitrap Elite	IT/CID
181	sample56	160430_09_PSzA_DPB_ITMSms2cid/2019UP_spall	DPB	control	Orbitrap Elite	IT/CID
182	sample57	160430_10_PSzA_DPB_ITMSms2cid/2019UP_spall	DPB	control	Orbitrap Elite	IT/CID

## Sheet: edgeR p<0.05 FC>8
Result of a meta analysis of 182 IPs (50 GFP, 35 E2FA, 39 E2FB, 20 E2FC, 36 RBR1, 3 DPA and 3 DPB). Statistics were performed by edgeR (Robinson et al. 2010.) using spectral counting (Owen E. et al. 2016) to determinethe relative abundance of individual proteins. p < 0.05 and an 8 fold change (FC) were used as cutoffs. Column J (common): + = detected also in TAP assays; Column L-Q: cells are colo…
GENE NAME	UNIPROT ID	AGI identifier	Protein name	logFC	logCPM	LR	PValue	FDR	common	repetition	E2FA	E2FB	E2FC	RBR1	DPA	DPB
RBR1	Q9LKZ3	AT3G12280	Retinoblastoma-related protein 1	13.7474	14.5161	341.048	3.77164e-76	6.23263e-73	+	123	32	37	16	32	3	3
E2FB	Q9FV71	AT5G22220	Transcription factor E2FB	11.5339	12.3106	120.583	4.71633e-28	3.89687e-25	+	73	0	39	0	28	3	3
E2FC	Q9FV70	AT1G47870	Transcription factor E2FC	10.5796	11.3658	76.4869	2.21682e-18	1.2211e-15	+	53	0	0	20	27	3	3
E2FA	Q9FNY0	AT2G36010	Transcription factor E2FA	10.1321	10.9255	90.4005	1.94521e-21	1.28579e-18	+	63	35	0	0	22	3	3
ALY3	Q6A332	AT3G21430	Protein ALWAYS EARLY 3	7.36503	8.30495	61.6297	4.14529e-15	1.95717e-12	+	55	0	22	7	20	3	3
MSI1	O22467	AT5G58230	Histone-binding protein MSI1	6.9328	7.92868	51.4153	7.47553e-13	3.08833e-10	+	49	0	20	8	15	3	3
LIN52A	O22147	AT2G45250	Uncharacterized protein At2g45250	6.23294	7.35501	40.8211	1.66818e-10	4.59445e-08	+	44	0	18	6	14	3	3
TCX5	Q9SZD1	AT4G29000	Protein tesmin/TSO1-like CXC 5	6.54124	7.60105	41.4139	1.2318e-10	3.70101e-08	+	43	0	18	6	14	3	2
DPA	Q9FNY3	AT5G02470	Transcription factor-like protein DPA	9.30393	10.118	129.134	6.33871e-30	6.98314e-27	+	84	23	34	11	13	3	0
PDF2.2	Q39182	AT2G02100	Defensin-like protein 2	4.07534	6.01006	8.91112	0.00283439	0.0699079	0	11	3	2	3	1	1	1
TIC100	Q8LPR8	AT5G22640	Protein TIC 100	3.25208	7.19313	8.83612	0.00295326	0.0717686	0	39	9	10	1	15	1	0
At4g31880	Q8GUP3	AT4G31880	Transcriptional regulator	3.9403	7.64259	11.9326	0.000551608	0.0260438	0	40	9	10	6	11	1	0
DPB	Q9FNY2	AT5G03415	Transcription factor-like protein DPB	11.3804	12.1588	365.154	2.12437e-81	7.02105e-78	+	124	35	38	20	28	0	3
XI-K	F4K5J1	AT5G20490	Myosin-17	7.09469	8.06754	47.4469	5.65138e-12	2.07531e-09	0	45	6	7	11	18	0	3
LIN37B	O50068	AT2G32840	Uncharacterized protein At2g32840	3.35628	5.72666	4.37765	0.0364132	0.265493	+	5	0	0	2	0	0	3
AP2M	O23140	AT5G46630	AP-2 complex subunit mu	3.75275	5.87673	11.5846	0.000664988	0.0289631	0	16	2	3	0	9	0	2
At5g46580	Q9LS25	AT5G46580	Pentatricopeptide repeat-containing protein At5g46580, chloroplastic	4.34811	6.14193	11.9895	0.000535001	0.0256258	0	15	1	4	1	7	0	2
At4g00670	O65276	AT4G00670	F6N23.13 protein	4.42793	6.17798	13.2806	0.000268173	0.0175985	0	17	4	8	1	2	0	2
LIN37A	Q8L4Z1	AT1G04930	Uncharacterized protein At1g04930	4.02032	5.98524	8.81517	0.00298736	0.0720673	+	11	0	5	3	1	0	2
AT5G50310	Q945N1	AT5G50310	AT5g50310/MXI22_1	3.19763	8.28342	8.24645	0.00408319	0.0870641	0	41	6	12	5	15	0	1
At5g66470	Q8VZ74	AT5G66470	GTPase ERA-like, chloroplastic	5.24985	6.65465	24.6495	6.87621e-07	0.000142037	0	29	7	7	0	14	0	1
At5g66420	Q94JM0	AT5G66420	AT5g66420/K1F13_7	3.26804	6.33523	5.34557	0.020775	0.21524	0	21	2	7	0	10	0	1
SNF4	Q944A6	AT1G09020	Sucrose nonfermenting 4-like protein	3.56028	6.16774	6.33674	0.0118262	0.15572	0	19	2	5	0	10	0	1
GYRBM	Q94BZ7	AT5G04130	DNA gyrase subunit B, mitochondrial	4.16056	6.05415	12.363	0.000437919	0.0219291	0	16	1	4	0	10	0	1
RABA3	A0A178WMT9	AT1G01200	Uncharacterized protein	4.37893	6.15835	12.7345	0.000358974	0.0202248	0	16	0	5	1	9	0	1
At5g14170	Q9FMT4	AT5G14170	SWI/SNF complex component SNF12 homolog	3.82063	5.90683	9.83645	0.00171087	0.0537799	0	13	2	1	0	9	0	1
AT3G50370	Q9SND1	AT3G50370	Uncharacterized protein F11C1_210	4.84511	6.40445	12.894	0.00032964	0.0194547	0	15	0	2	6	6	0	1
ALY1	Q6A331	AT5G27610	Protein ALWAYS EARLY 1	4.53278	6.22479	7.84856	0.00508613	0.0971657	+	8	0	1	4	2	0	1
SH3P2	Q8VWF1	AT4G34660	SH3 domain-containing protein 2	3.7822	6.51557	4.4884	0.0341255	0.263692	0	14	2	5	3	2	0	1
DRC2	Q94EI6	AT2G40630	At2g40630/T2P4.2	3.78544	5.89093	7.26388	0.0070355	0.112875	+	9	0	4	4	0	0	1
ALY2	Q6A333	AT3G05380	Protein ALWAYS EARLY 2	3.26785	5.70638	4.31354	0.0378101	0.270261	+	4	0	2	1	0	0	1
At2g20920	Q9SKS8	AT2G20920	At2g20920/F5H14.11	5.60135	6.88715	23.0168	1.60592e-06	0.00031221	0	26	5	3	2	16	0	0
EIF6-2	Q9M060	AT3G55620	Eukaryotic translation initiation factor 6-2	3.60794	7.21561	12.9815	0.00031458	0.0189034	+	46	10	15	2	15	0	0
At1g29320	Q0V856	AT1G29320	At1g29320	6.71223	7.74288	30.7219	2.97789e-08	7.02994e-06	0	30	5	8	3	14	0	0
NOP2A	Q9FG73	AT5G55920	Nucleolar protein-like	4.83021	7.50925	12.631	0.000379406	0.0202248	0	29	6	5	3	14	0	0
RZ1C	Q8RWN5	AT5G04280	Glycine-rich RNA-binding protein RZ1C	4.65216	6.29991	19.0025	1.30549e-05	0.00179777	0	24	2	5	4	13	0	0
RTNLB3	Q9SH59	AT1G64090	Reticulon-like protein B3	4.17786	6.05854	20.6008	5.65729e-06	0.000934866	0	27	6	7	1	13	0	0
AP4M	Q9SB50	AT4G24550	AP-4 complex subunit mu	4.52918	6.23341	17.2411	3.29237e-05	0.0040301	0	22	3	6	0	13	0	0
PLP1	O23179	AT4G37070	Patatin-like protein 1	3.34339	5.73104	13.3245	0.000261967	0.0175985	0	19	3	3	0	13	0	0
UXT3	Q8RXL8	AT1G06890	UDP-xylose transporter 3	3.4428	5.76501	12.6706	0.00037145	0.0202248	0	18	2	3	0	13	0	0
AT5G53650	Q9FJB9	AT5G53650	ABC transporter A family protein	3.23467	5.69729	10.3795	0.00127425	0.0468355	0	15	1	1	0	13	0	0
SSL8	Q9M1J7	AT3G57010	Protein STRICTOSIDINE SYNTHASE-LIKE 8	3.20742	6.44445	7.95242	0.00480231	0.0961917	0	31	8	9	0	12	0	0
HLB1	Q9FHY8	AT5G41950	Protein HLB1	3.65294	6.42357	6.58017	0.0103121	0.143804	0	21	3	5	0	12	0	0
TMK4	Q9LK43	AT3G23750	Receptor-like kinase TMK4	3.73042	5.87108	13.8178	0.000201421	0.0151453	0	19	3	4	0	12	0	0
At4g39280	Q9T034	AT4G39280	Phenylalanine--tRNA ligase alpha subunit, cytoplasmic	4.17349	6.06232	12.4741	0.000412641	0.0211882	0	16	2	2	0	12	0	0
FTSH12	Q9SAJ3	AT1G79560	ATP-dependent zinc metalloprotease FTSH 12, chloroplastic	4.12783	6.04098	11.6791	0.000632076	0.0289251	0	15	1	2	0	12	0	0
rpoC1	P56763	ATCG00180	DNA-directed RNA polymerase subunit beta'	3.03599	6.29027	7.27623	0.00698729	0.112649	0	30	3	9	5	11	0	0
XRN3	Q9FQ03	AT1G75660	5'-3' exoribonuclease 3	4.62397	6.28349	15.1634	9.85968e-05	0.00905174	0	19	0	3	5	11	0	0
GPAT4	Q9LMM0	AT1G01610	Glycerol-3-phosphate 2-O-acyltransferase 4	3.13528	6.55127	6.1419	0.0132015	0.164282	0	27	4	7	3	11	0	0
AT4G14420	O23298	AT4G14420	AT4g14420/AT4G14420	3.03155	5.63687	10.8891	0.000967301	0.0385172	0	16	1	2	2	11	0	0
DHQS	Q8VYV7	AT5G66120	3-dehydroquinate synthase, chloroplastic	3.94852	5.9563	19.3265	1.10168e-05	0.00158307	0	26	7	8	0	11	0	0
PTAC14	Q84JF5	AT4G20130	Protein PLASTID TRANSCRIPTIONALLY ACTIVE 14	4.61059	6.27736	18.2424	1.94502e-05	0.00257131	0	23	6	6	0	11	0	0
At2g24580	Q53YK5	AT2G24580	Peroxisomal sarcosine/pipecolate oxidase	3.90252	5.94043	14.839	0.000117088	0.0101836	0	20	4	5	0	11	0	0
CDKA-1	P24100	AT3G48750	Cyclin-dependent kinase A-1	4.27605	6.10748	12.5593	0.000394244	0.0206822	+	16	0	5	0	11	0	0
GID8	Q84WK5	AT1G61150	Protein GID8 homolog	3.67814	5.85143	13.0563	0.000302261	0.0189034	0	18	3	4	0	11	0	0
AT5G58490	Q9FGH3	AT5G58490	Cinnamoyl-CoA reductase-like protein	4.04128	6.00138	13.6288	0.000222741	0.0160034	0	18	4	3	0	11	0	0
At3g62700	Q0WPY5	AT3G62700	ABC transporter-like protein	3.50086	5.78593	12.8442	0.000338521	0.0196283	0	18	4	3	0	11	0	0
At2g38580	Q682E1	AT2G38580	Mitochondrial ATP synthase D chain-related protein	5.41287	6.76121	15.8859	6.72768e-05	0.00739565	0	17	3	3	0	11	0	0
RER1A	O48670	AT4G39220	Protein RER1A	3.14609	5.67205	9.73481	0.00180811	0.0543925	0	14	0	3	0	11	0	0
CALS9	Q9SFU6	AT3G07160	Callose synthase 9	3.75966	5.88227	13.8158	0.000201632	0.0151453	0	19	6	2	0	11	0	0
ARO2	Q9FKW5	AT5G66200	Armadillo repeat only 2	3.03298	5.6378	10.2203	0.00138901	0.0493623	0	15	2	2	0	11	0	0
At3g04600	Q9SR15	AT3G04600	Tryptophan--tRNA ligase, cytoplasmic	3.8602	5.92632	9.97054	0.00159065	0.0531021	0	13	0	2	0	11	0	0
UEV1C	Q9SJ44	AT2G36060	Ubiquitin-conjugating enzyme E2 variant 1C	3.18349	5.68464	8.49452	0.00356217	0.0819624	0	12	0	1	0	11	0	0
HIPP25	O49613	AT4G35060	Heavy metal-associated isoprenylated plant protein 25	3.05989	5.64778	8.35333	0.00384981	0.0839453	0	12	0	1	0	11	0	0
AT4g16450	O23489	AT4G16450	Uncharacterized protein AT4g16450	3.08535	5.65525	8.38553	0.00378219	0.0838935	0	12	1	0	0	11	0	0
At4g21105	Q8LCZ9	AT4G21105	Uncharacterized protein	3.49212	5.78666	8.21007	0.00416586	0.087858	0	11	0	0	0	11	0	0
OEP64	Q9LVH5	AT3G17970	Outer envelope protein 64, chloroplastic	3.39814	6.04608	5.96817	0.0145664	0.173173	0	18	0	5	2	10	0	0
GAUT9	Q9FWA4	AT3G02350	Probable galacturonosyltransferase 9	3.05344	5.64582	8.35211	0.00385239	0.0839453	0	12	0	1	1	10	0	0
At5g24580	A0A178UGL2	AT5G24580	Uncharacterized protein	4.76176	6.35981	19.9927	7.77389e-06	0.00122346	0	25	5	10	0	10	0	0
MVD1	O23722	AT2G38700	Diphosphomevalonate decarboxylase MVD1, peroxisomal	3.19481	6.02792	4.2929	0.0382719	0.270261	0	15	0	4	0	10	0	0
PDX2	Q8LAD0	AT5G60540	Probable pyridoxal 5'-phosphate synthase subunit PDX2	4.3479	6.14414	14.7899	0.000120175	0.0101841	+	19	6	3	0	10	0	0
SAC7	Q9C5G5	AT3G51460	Phosphoinositide phosphatase SAC7	3.50844	5.78898	11.4212	0.000726108	0.0307665	0	16	3	3	0	10	0	0
ATTIM21L-2	Q9LXZ7	AT3G56430	At3g56430	3.25924	5.70658	9.82147	0.00172486	0.0537799	0	14	3	1	0	10	0	0
At5g64430	Q9FGF3	AT5G64430	At5g64430	3.75185	5.87577	9.67528	0.00186764	0.0546244	0	13	2	1	0	10	0	0
YBEY	Q8L5Z4	AT2G25870	Endoribonuclease YBEY, chloroplastic	3.03617	5.64129	7.70853	0.00549605	0.102624	0	11	0	1	0	10	0	0
ALPHAC-AD	Q8LPK4	AT5G22780	AP-2 complex subunit alpha-2	3.75439	5.87995	13.7587	0.000207851	0.0152655	0	19	3	6	1	9	0	0
RAP	Q8VZE7	AT2G31890	RAP domain-containing protein, chloroplastic	3.3297	5.72899	9.23008	0.00238071	0.0624464	0	13	1	2	1	9	0	0
At5g42850	Q9FMN4	AT5G42850	Thioredoxin-like protein Clot	3.36398	6.07972	6.42604	0.0112459	0.150477	0	20	5	5	0	9	0	0
At2g43770	O22826	AT2G43770	At2g43770	3.67601	5.85004	12.9877	0.000313544	0.0189034	0	18	4	5	0	9	0	0
TPS9	Q9LRA7	AT1G23870	Probable alpha,alpha-trehalose-phosphate synthase [UDP-forming] 9	3.5752	5.81448	10.8589	0.00098321	0.0386846	0	15	2	4	0	9	0	0
UGGT	Q0WL80	AT1G71220	UDP-glucose:glycoprotein glucosyltransferase	3.37406	5.74458	9.30629	0.00228368	0.0603805	0	13	0	4	0	9	0	0
RIBA3	Q9FN89	AT5G59750	Monofunctional riboflavin biosynthesis protein RIBA 3, chloroplastic	3.14228	5.67103	9.03887	0.002643	0.0666802	0	13	1	3	0	9	0	0
SEC10a	X5JA13	AT5G12370	Exocyst complex component SEC10a	3.3201	5.72757	8.61556	0.00333303	0.0781252	0	12	0	3	0	9	0	0
AN	O23702	AT1G01510	C-terminal binding protein AN	3.67981	5.85221	10.2697	0.00135235	0.0485818	0	14	3	2	0	9	0	0
UGT76C5	Q9FI97	AT5G05890	UDP-glycosyltransferase 76C5	3.27986	5.71338	9.17832	0.00244898	0.0637314	0	13	2	2	0	9	0	0
At2g43130	A0A178VPX9	AT2G43130	Uncharacterized protein	3.67664	5.84886	8.96707	0.00274889	0.0688264	0	12	1	2	0	9	0	0
NRPB3	Q39211	AT2G15430	DNA-directed RNA polymerases II, IV and V subunit 3	3.13261	5.66835	8.3996	0.00375303	0.0838935	0	12	1	2	0	9	0	0
CKA4	O64816	AT2G23070	Casein kinase II subunit alpha-4, chloroplastic	3.05023	5.64558	7.71748	0.00546888	0.102624	0	11	0	2	0	9	0	0
BPG2	Q8W4I6	AT3G57180	GTP-binding protein BRASSINAZOLE INSENSITIVE PALE GREEN 2, chloroplastic	3.02082	5.63727	7.69819	0.00552763	0.102634	0	11	0	2	0	9	0	0
At1g73885	Q8L713	AT1G73885	At1g73885	3.10674	5.66179	7.77527	0.00529664	0.100031	0	11	1	1	0	9	0	0
ADT3	Q9ZUY3	AT2G27820	Arogenate dehydratase 3, chloroplastic	3.02321	5.6385	7.08087	0.0077911	0.122036	0	10	0	1	0	9	0	0
GAMMA-ADR	Q84K16	AT1G23900	AP-1 complex subunit gamma-1	3.01547	5.63689	6.45393	0.0110707	0.149342	0	9	0	0	0	9	0	0
At2g45520	O64632	AT2G45520	Coiled-coil protein	3.97474	5.97056	12.6688	0.000371806	0.0202248	0	17	3	3	3	8	0	0
ycf2-A	P56786	ATCG00860	Protein Ycf2	3.9034	5.94293	9.99208	0.00157215	0.0530199	0	13	2	2	1	8	0	0
AT3G56290	Q9LYL4	AT3G56290	Potassium transporter	4.0837	6.01837	9.61338	0.00193165	0.0560008	0	12	1	2	1	8	0	0
PER31	Q9LHA7	AT3G28200	Peroxidase 31	3.26231	5.70714	7.88095	0.00499583	0.0971248	0	11	0	2	1	8	0	0
RKL1	Q9LP77	AT1G48480	Probable inactive receptor kinase At1g48480	3.16184	5.67642	9.0513	0.00262508	0.0666802	0	13	0	5	0	8	0	0
At3g04650	Q9SR09	AT3G04650	AT3g04650/F7O18_13	3.17741	5.68121	9.73857	0.00180441	0.0543925	0	14	3	3	0	8	0	0
PATROL1	Q8RX56	AT5G06970	Protein unc-13 homolog	4.92609	6.45251	9.88587	0.00166553	0.0537787	0	10	1	1	0	8	0	0
MLE2.18	Q84JB7	AT5G63550	DEK domain-containing chromatin associated protein	5.0444	6.52199	14.68	0.000127389	0.0105255	0	17	1	6	3	7	0	0
SDH4	Q941A0	AT2G46505	Succinate dehydrogenase subunit 4, mitochondrial	3.63813	5.83444	11.4581	0.000711829	0.0305532	0	16	4	3	2	7	0	0
P4H5	Q24JN5	AT2G17720	Prolyl 4-hydroxylase 5	3.82584	5.90864	11.7677	0.000602689	0.0280547	0	16	3	5	1	7	0	0
PVA42	Q8VYN2	AT4G21450	Vesicle-associated protein 4-2	3.29274	5.71579	7.89912	0.00494589	0.097042	0	11	2	1	1	7	0	0
At5g06110	Q9LHS5	AT5G06110	Cell division related protein-like	3.58447	6.69108	6.20978	0.0127047	0.162538	0	23	6	9	0	7	0	0
SEC5A	Q8S3U9	AT1G76850	Exocyst complex component SEC5A	3.34081	5.73308	9.89964	0.00165311	0.0537787	0	14	4	3	0	7	0	0
At2g39670	O48815	AT2G39670	At2g39670/F17A14.4	3.05036	5.64342	7.66657	0.00562532	0.103287	0	11	1	3	0	7	0	0
KEU	Q9C5X3	AT1G12360	SNARE-interacting protein KEULE	4.07579	6.01346	8.33627	0.00388612	0.0839453	0	10	1	2	0	7	0	0
PGIC	P34795	AT5G42740	Glucose-6-phosphate isomerase, cytosolic	3.85564	5.9246	7.44046	0.00637737	0.109777	0	9	1	1	0	7	0	0
At2g18220	Q9ZPV5	AT2G18220	Nucleolar complex protein 2 homolog	3.75418	5.88152	9.73254	0.00181034	0.0543925	0	13	1	3	3	6	0	0
rpl32	P61847	ATCG01020	50S ribosomal protein L32, chloroplastic	3.52904	5.79777	10.8084	0.00101041	0.0388303	0	15	2	6	1	6	0	0
MOS1	Q9SB63	AT4G24680	Protein MODIFIER OF SNC1 1	5.35216	6.71943	17.0079	3.72243e-05	0.0043938	0	19	3	4	7	5	0	0
AT5G04600	Q9LZ65	AT5G04600	AT5g04600/T32M21_200	4.44157	7.76997	9.43081	0.0021337	0.059373	0	26	6	7	6	5	0	0
FKBP53	Q93ZG9	AT4G25340	Peptidyl-prolyl cis-trans isomerase FKBP53	5.20702	6.62467	13.8612	0.000196825	0.0151453	0	15	3	4	3	5	0	0
TAF15B	Q94KD0	AT5G58470	Transcription initiation factor TFIID subunit 15b	3.75388	5.88158	8.4711	0.00360833	0.0822449	0	11	0	3	3	5	0	0
At2g31800	Q1JPN7	AT2G31800	At2g31800	3.63024	6.87963	5.31675	0.0211214	0.215385	0	20	5	8	1	5	0	0
At5g10010	A0A178UHT4	AT5G09620	HIT4	4.06714	6.01039	10.8323	0.000997433	0.0387825	0	14	3	5	1	5	0	0
At5g09880	Q84WH4	AT5G09880	Splicing factor-like protein	4.83683	6.40058	11.5818	0.00066602	0.0289631	0	13	2	5	1	5	0	0
At2g15270	Q9SHU9	AT2G15270	Expressed protein	3.07895	5.65313	6.48857	0.010857	0.148274	0	9	0	3	1	5	0	0
NAD-ME2	Q8L7K9	AT4G00570	NAD-dependent malic enzyme 2, mitochondrial	3.24024	6.32238	5.59522	0.0180096	0.199579	0	22	6	10	0	5	0	0
C7A10.830	O23227	AT4G36530	Alpha/beta-Hydrolases superfamily protein	3.28404	5.71209	12.4557	0.000416712	0.0211882	0	18	7	6	0	5	0	0
RH39	Q56X76	AT4G09730	DEAD-box ATP-dependent RNA helicase 39	4.33676	6.13684	13.257	0.000271565	0.0175985	0	17	4	5	4	4	0	0
MDF20.11	Q9FM71	AT5G55670	RNA-binding (RRM/RBD/RNP motifs) family protein	4.37697	6.1547	13.2639	0.000270563	0.0175985	0	17	5	4	4	4	0	0
emb1441	Q9LTX7	AT5G49930	Gb|AAF56406.1	4.89261	6.43084	12.3278	0.000446255	0.022013	0	14	2	5	3	4	0	0
XI-H	F4JM19	AT4G28710	Myosin-14	3.65615	5.84284	8.94076	0.00278876	0.0692997	0	12	3	4	1	4	0	0
At1g70940	Q0WV81	AT1G70940	Auxin efflux carrier component	3.56834	5.81043	8.83955	0.00294772	0.0717686	0	12	2	6	0	4	0	0
SKL2	O82290	AT2G35500	Probable inactive shikimate kinase like 2, chloroplastic	3.02684	5.64041	5.84901	0.0155858	0.182018	0	8	0	4	0	4	0	0
At3g06940	A0A178V8F0	AT3G06940	Uncharacterized protein	3.83472	5.91107	9.79558	0.00174931	0.0540325	0	13	6	3	0	4	0	0
T20N10_10	Q9LXT5	AT3G58660	Ribosomal protein L1p/L10e family	6.80537	7.82208	22.7085	1.88531e-06	0.000346163	0	19	5	8	3	3	0	0
At2g37990	Q0WWN4	AT2G37990	Ribosome biogenesis regulatory protein	3.14926	7.19254	4.00897	0.0452587	0.300545	0	20	6	7	3	3	0	0
MZA15.26	Q9LUK6	AT5G46840	At5g46840	4.37746	6.15498	10.085	0.00149479	0.0520031	0	12	3	3	3	3	0	0
At5g37350	Q67YW7	AT5G37350	Serine/threonine-protein kinase RIO1	4.15093	6.04081	8.39421	0.00376417	0.0838935	0	10	2	2	3	3	0	0
HDT3	Q9LZR5	AT5G03740	Histone deacetylase HDT3	3.71538	5.86868	6.60224	0.0101851	0.143804	0	8	0	2	3	3	0	0
CID7	O64843	AT2G26280	Polyadenylate-binding protein-interacting protein 7	3.41199	5.7551	8.6385	0.00329133	0.0776988	0	12	2	5	2	3	0	0
RLM3	Q9FT77	AT4G16990	Disease resistance protein RLM3	3.80543	5.90034	6.04509	0.013945	0.168821	0	7	1	1	2	3	0	0
At4g36740	A0A178UWG6	AT4G32070	Phox4	6.08996	7.24293	17.9835	2.22833e-05	0.00283254	0	17	6	7	1	3	0	0
SRP-54C	P49967	AT1G48900	Signal recognition particle 54 kDa protein 3	3.7593	5.88088	9.05522	0.00261946	0.0666802	0	12	1	7	1	3	0	0
At5g11210	Q8LBI3	AT5G11210	Putative GTP-binding protein	4.39595	6.15828	9.4233	0.00214245	0.059373	0	11	2	5	1	3	0	0
ABCG15	Q8RWI9	AT3G21090	ABC transporter G family member 15	3.10489	5.65646	5.2391	0.0220847	0.216587	0	7	1	2	1	3	0	0
At2g19385	Q8LFS1	AT2G19385	Uncharacterized protein	3.79583	5.89246	9.6817	0.00186112	0.0546244	0	13	5	5	0	3	0	0
VIII-1	Q9LHE9	AT3G19960	Myosin-1	4.12045	6.02985	5.13133	0.0234977	0.223804	0	5	1	1	0	3	0	0
TRAF1B	A8MQL1	AT1G04300	TNF receptor-associated factor homolog 1b	3.81848	5.89684	5.37057	0.0204793	0.214782	0	6	3	0	0	3	0	0
At1g80750	Q0WU42	AT1G80750	Putative ribosomal protein L7	6.517	7.58343	21.2902	3.94741e-06	0.000686642	0	19	5	6	6	2	0	0
HON4	Q9LSK7	AT3G18035	At3g18035	3.14899	6.32515	5.15407	0.023192	0.222173	0	22	7	8	4	2	0	0
PES	Q9LYK7	AT5G14520	Pescadillo homolog	4.13752	6.93826	6.59169	0.0102456	0.143804	0	19	4	8	4	2	0	0
RH51	Q9LIH9	AT3G18600	DEAD-box ATP-dependent RNA helicase 51	4.79011	7.42209	8.09369	0.00444196	0.0917542	0	18	4	7	4	2	0	0
At1g63810	Q0WVM5	AT1G63810	Nucleolar protein	6.12483	7.27374	15.4464	8.48768e-05	0.00801479	0	13	3	5	3	2	0	0
At2g40430	O22892	AT2G40430	Ribosome biogenesis protein NOP53	3.96193	5.96325	11.2431	0.000799201	0.0334349	0	15	3	8	2	2	0	0
MHF15.12	Q9FNH2	AT5G06360	Ribosomal protein S8e family protein	5.23154	6.64127	12.6464	0.000376292	0.0202248	0	13	5	4	2	2	0	0
GTL1	Q9C882	AT1G33240	Trihelix transcription factor GTL1	3.27899	6.17409	4.84696	0.0276949	0.245409	0	18	9	5	1	2	0	0
WDL4	Q9SJ62	AT2G35880	Protein WVD2-like 4	3.87593	5.92736	7.99986	0.00467809	0.0949561	0	10	5	2	1	2	0	0
ALDH2C4	Q56YU0	AT3G24503	Aldehyde dehydrogenase family 2 member C4	4.07876	6.014	6.47662	0.0109303	0.148661	0	7	2	2	1	2	0	0
At3g14220	Q9LJP2	AT3G14220	GDSL esterase/lipase At3g14220	4.55632	6.23993	6.63488	0.0100001	0.143697	0	6	1	2	1	2	0	0
RH29	O49289	AT1G77030	Putative DEAD-box ATP-dependent RNA helicase 29	4.5214	6.22836	8.48995	0.00357113	0.0819624	0	9	3	4	0	2	0	0
AT4G16380	Q8VZA7	AT4G16380	Uncharacterized protein At4g16380	3.4778	5.77493	6.25445	0.0123881	0.160291	0	8	3	3	0	2	0	0
CIP7	O80386	AT4G27430	COP1-interacting protein 7	3.19882	5.68924	5.36024	0.0206009	0.214782	0	7	2	3	0	2	0	0
At1g61730	Q9SYA9	AT1G61730	Probable transcription factor At1g61730	3.41531	5.75338	4.42273	0.0354632	0.265439	0	5	1	2	0	2	0	0
At3g04470	Q9M840	AT3G04470	Ankyrin repeat family protein	3.20489	5.68258	4.26546	0.0388947	0.271269	0	5	1	2	0	2	0	0
F17A9.19	Q9M8Z6	AT3G07030	F17A9.19 protein	3.1021	5.65901	5.2541	0.0218952	0.216011	0	7	4	1	0	2	0	0
F9D24.20	Q9M2K5	AT3G58110	Uncharacterized protein F9D24.20	4.34281	6.12948	5.09132	0.0240459	0.225772	0	2	0	0	0	2	0	0
At3g06530	Q9C8Z4	AT3G06530	Uncharacterized protein At3g06530	3.08798	5.65764	5.26578	0.0217486	0.216011	0	7	1	2	3	1	0	0
SWA1	O82266	AT2G47990	Protein SLOW WALKER 1	3.29781	5.72098	5.46791	0.0193687	0.209526	0	7	2	1	3	1	0	0
At1g54770	Q84K05	AT1G54770	Fcf2 pre-rRNA processing protein	3.22316	5.69496	6.60462	0.0101714	0.143804	0	9	2	4	2	1	0	0
At5g11240/F2I11_130	Q8GX58	AT5G11240	Uncharacterized protein At5g11240/F2I11_130	3.30154	5.71884	5.44253	0.0196522	0.209526	0	7	2	2	2	1	0	0
At4g15770	Q6NM52	AT4G15770	60S ribosome subunit biogenesis protein NIP7 homolog	4.65822	6.3032	9.41196	0.00215575	0.059373	0	10	3	5	1	1	0	0
ACD32.1	Q208N7	AT1G06460	Alpha-crystallin domain 32.1	4.05015	5.99526	4.88316	0.0271199	0.242246	0	3	0	1	1	1	0	0
JAL10	Q8GWI7	AT1G52070	Jacalin-related lectin 10	5.49767	6.80652	6.95522	0.00835749	0.127877	0	3	1	0	1	1	0	0
JAL41	Q9FGC5	AT5G35940	Jacalin-related lectin 41	4.58609	6.25519	5.26302	0.0217832	0.216011	0	2	0	0	1	1	0	0
DEGP9	Q9FL12	AT5G40200	Protease Do-like 9	3.34408	5.7361	4.37124	0.0365505	0.265493	0	5	1	3	0	1	0	0
At3g55340	Q681R8	AT3G55340	Uncharacterized protein At3g55340	3.75901	5.88023	5.31959	0.021087	0.215385	0	6	3	2	0	1	0	0
KIN10	Q38997	AT3G01090	SNF1-related protein kinase catalytic subunit alpha KIN10	4.14175	6.03487	5.16002	0.0231126	0.222056	0	5	2	2	0	1	0	0
S-ACP-DES6	Q84VY3	AT1G43800	Stearoyl-[acyl-carrier-protein] 9-desaturase 6, chloroplastic	3.06762	5.6434	4.16228	0.0413337	0.283419	0	2	0	1	0	1	0	0
AT4G25730	Q8VZJ4	AT4G25730	Putative rRNA methyltransferase	5.34476	6.71616	15.6688	7.5457e-05	0.00741092	0	17	5	7	5	0	0	0
WDR12	Q9LF27	AT5G15550	Ribosome biogenesis protein WDR12 homolog	4.80265	6.38464	10.3393	0.00130228	0.0472969	0	11	4	3	4	0	0	0
At2g37440	A0A178VNE0	AT2G37440	Ribosome biogenesis protein BOP1 homolog	6.38558	7.47879	15.828	6.93692e-05	0.00739565	0	12	4	5	3	0	0	0
EBP2	Q9LUJ5	AT3G22660	Probable rRNA-processing protein EBP2 homolog	5.0952	6.55649	11.6591	0.000638889	0.0289251	0	12	4	5	3	0	0	0
AT1G23280	Q9LR34	AT1G23280	Protein MAK16 homolog	4.8457	6.40884	11.0418	0.000890812	0.0363473	0	12	4	5	3	0	0	0
At1g02870	Q8RWK5	AT1G02870	At1g02870	4.58129	6.25882	10.4618	0.0012187	0.0457706	0	12	4	5	3	0	0	0
T10D10.9	Q9C9E2	AT1G72440	Uncharacterized protein T10D10.9	4.67461	6.31357	9.47086	0.00208761	0.0589706	0	10	3	4	3	0	0	0
T12P18.20	Q9S826	AT1G63780	Putative U3 small nucleolar ribonucleoprotein	3.50127	5.78563	6.28614	0.0121686	0.158335	0	8	2	3	3	0	0	0
At3g21540	Q9LVF2	AT3G21540	Transducin family protein / WD-40 repeat family protein	3.42389	5.76224	6.24359	0.0124644	0.160291	0	8	2	3	3	0	0	0
RH47	Q8W4E1	AT1G12770	DEAD-box ATP-dependent RNA helicase 47, mitochondrial	3.78553	5.89002	6.00889	0.014234	0.170516	0	7	1	3	3	0	0	0
At2g18900	O64620	AT2G18900	Uncharacterized protein At2g18900	3.47797	5.78063	5.66638	0.0172931	0.195732	0	7	2	2	3	0	0	0
GRP3	Q9SL15	AT2G05520	Glycine-rich protein 3	3.13174	5.67092	5.31319	0.0211646	0.215385	0	7	2	2	3	0	0	0
MEE49	Q9M125	AT4G01560	AT4g01560/F11O4_6	5.38612	6.74443	11.2172	0.000810425	0.0334807	0	10	3	5	2	0	0	0
At5g20600	Q8RY12	AT5G20600	AT5g20600/F7C8_190	3.93014	5.95321	7.51503	0.00611862	0.108181	0	9	2	5	2	0	0	0
At1g36730	Q9C8F1	AT1G36730	Probable eukaryotic translation initiation factor 5-1	4.11121	6.0276	6.51212	0.0107141	0.147543	0	7	1	4	2	0	0	0
TIM44-2	Q5XF06	AT2G36070	Mitochondrial import inner membrane translocase subunit TIM44-2	4.95478	6.4685	7.52278	0.00609237	0.108181	0	6	1	3	2	0	0	0
At1g03140	Q9SA55	AT1G03140	F10O3.3 protein	3.71838	5.86302	4.64459	0.0311516	0.261225	0	5	1	2	2	0	0	0
At2g44730	O80512	AT2G44730	Alcohol dehydrogenase transcription factor Myb/SANT-like family protein	3.42304	5.75114	4.4276	0.0353623	0.265439	0	5	2	1	2	0	0	0
PTAC13	Q94AA3	AT3G09210	AT3g09210/F3L24_8	3.59084	5.81536	6.37148	0.0115969	0.153927	0	8	2	5	1	0	0	0
At3g26560	Q38953	AT3G26560	Probable pre-mRNA-splicing factor ATP-dependent RNA helicase DEAH5	5.04728	6.52458	7.10904	0.00766962	0.120705	0	5	1	3	1	0	0	0
RID2	Q9LVD0	AT5G57280	18S rRNA (guanine-N(7))-methyltransferase RID2	3.61125	5.82289	4.56664	0.0326004	0.263692	0	5	1	3	1	0	0	0
PDF2.3	Q9ZUL7	AT2G02130	Defensin-like protein 1	3.36312	5.73659	4.84289	0.0277603	0.245409	0	6	3	2	1	0	0	0
PAA1	O81146	AT5G35590	Proteasome subunit alpha type-6-A	3.40594	5.75087	4.41594	0.0356047	0.265439	0	5	2	2	1	0	0	0
At3g11930	A0A178VI64	AT3G11930	RRP5	3.36612	5.74326	4.38753	0.0362028	0.265439	0	5	2	2	1	0	0	0
T1B9.17	Q9SFU7	AT3G07170	AT3g07170/T1B9_17	4.48411	6.207	5.19149	0.0226977	0.218705	0	4	1	2	1	0	0	0
SH3P3	Q8L7W0	AT4G18060	SH3 domain-containing protein 3	3.89571	5.93359	4.77272	0.0289142	0.250771	0	4	1	2	1	0	0	0
At3g23310	Q9LW66	AT3G23310	Non-specific serine/threonine protein kinase	3.39373	5.74695	4.40694	0.0357929	0.265439	0	4	1	2	1	0	0	0
VPS24-1	Q9FFB3	AT5G22950	Vacuolar protein sorting-associated protein 24 homolog 1	3.36305	5.73629	4.38415	0.0362746	0.265439	0	4	1	2	1	0	0	0
At2g23940	O82222	AT2G23940	Expressed protein	3.00585	5.63309	4.11758	0.0424396	0.2898	0	3	0	2	1	0	0	0
ROS3	Q8L734	AT5G58130	Uncharacterized protein	3.49367	5.78389	5.00446	0.0252821	0.230822	0	6	4	1	1	0	0	0
At4g26130	Q38810	AT4G26130	cDNA-5-encoded protein (Fragment)	3.47472	5.77376	4.46655	0.0345648	0.265032	0	3	1	1	1	0	0	0
FBL17	Q8W104	AT3G54650	F-box/LRR-repeat protein 17	3.96786	5.95973	7.51259	0.00612692	0.108181	+	9	3	6	0	0	0	0
YUP8H12R.24	O64537	AT1G79140	YUP8H12R.24 protein	3.27345	5.71225	4.77072	0.0289477	0.250771	0	6	2	4	0	0	0	0
At1g75670	Q8H1F8	AT1G75670	DNA-directed RNA polymerase	4.65799	6.29945	7.53668	0.00604552	0.108181	0	7	4	3	0	0	0	0
At3g04500	Q9M837	AT3G04500	Putative RRM-containing protein	3.17674	5.67902	5.31505	0.021142	0.215385	0	7	4	3	0	0	0	0
RBL	Q0WVH0	AT3G55510	Noc2p family	3.24623	5.70313	4.7376	0.0295102	0.253697	0	6	3	3	0	0	0	0
RH28	Q9ZRZ8	AT4G16630	DEAD-box ATP-dependent RNA helicase 28	4.18974	6.06816	5.29915	0.0213358	0.215632	0	5	2	3	0	0	0	0
YAO	Q9M0V4	AT4G05410	U3 snoRNP-associated protein-like YAO	3.92037	5.94547	4.82684	0.0280199	0.245409	0	5	2	3	0	0	0	0
At1g43860	Q8LDC0	AT1G43860	Uncharacterized protein	3.0534	5.64252	4.15244	0.0415745	0.28448	0	4	1	3	0	0	0	0
EMB1865	Q9LS51	AT3G18390	CRS1 / YhbY (CRM) domain-containing protein	4.0973	6.02092	5.10205	0.0238976	0.225772	0	5	3	2	0	0	0	0
At2g44860	O22165	AT2G44860	Probable ribosome biogenesis protein RLP24	3.5497	5.80636	4.52249	0.0334522	0.263692	0	5	3	2	0	0	0	0
PRORP1	Q66GI4	AT2G32230	Proteinaceous RNase P 1, chloroplastic/mitochondrial	3.70521	5.85812	4.63505	0.0313253	0.26144	0	3	1	2	0	0	0	0
At1g60850	Q39215	AT1G60850	RNA polymerase subunit	4.29204	6.11004	5.45822	0.0194765	0.209526	0	5	4	1	0	0	0	0
RPC14	Q42483	AT2G29540	DNA-directed RNA polymerase 14 kDa subunit (AtRPAC14)	3.29508	5.71647	4.33413	0.0373556	0.269564	0	5	4	1	0	0	0	0
At3g03790/F20H23_18	Q8GZ56	AT3G03790	Uncharacterized protein At3g03790/F20H23_18	3.31713	5.72516	4.35083	0.0369908	0.267516	0	4	3	1	0	0	0	0
MQM1.14	Q8L7M3	AT5G23590	At5g23590	3.39099	5.74524	4.40478	0.0358384	0.265439	0	2	1	1	0	0	0	0

## Sheet: Venn diagram
Venn diagram showing the overlap of the results of the IPs presented on sheet "edgeR p<0.05 FC>8". Only prey proteins found with one specific bait at least 3 times in case of E2FA, E2FB, E2FC, and RBR1 or at least one time in case of the DPs (DPA or DPB) were considered. Column A: Venn diagram groups, Column B: number of elements per group, Column C: AGI identifiers of the group elements. Common …
Overlap of IP with	total	elements	alias
DPs E2FA E2FB E2FC RBR1	6	AT5G03415	DPB
		AT5G02470	DPA
		AT5G50310
		AT5G20490
		AT3G12280	RBR1
		AT4G31880
E2FA E2FB E2FC RBR1	13	AT5G04600
		AT2G45520
		AT2G37990
		AT4G24680
		AT3G58660
		AT5G55920
		ATCG00180
		AT1G29320
		AT1G01610
		AT4G09730
		AT4G25340
		AT5G46840
		AT5G55670
DPs E2FA E2FB RBR1	2	AT5G22640
		AT5G66470
DPs E2FB E2FC RBR1	4	AT3G21430	ALY3
		AT4G29000	TCX5
		AT2G45250	LIN52A
		AT5G58230	MSI1
E2FA E2FB E2FC	12	AT1G72440
		AT5G15550
		AT1G02870
		AT3G18035
		AT1G23280
		AT5G14520
		AT4G25730
		AT1G63810
		AT3G18600
		AT3G22660
		AT1G80750
		AT2G37440
E2FA E2FB RBR1	34	AT1G61150
		AT5G09620
		AT2G24580
		AT4G32070
		AT5G24580
		AT2G17720
		AT2G46505
		AT4G37070
		AT5G06110
		AT4G28710
		AT4G24550
		AT2G31800
		AT2G20920
		AT3G23750
		AT3G06940
		AT2G43770
		AT1G64090
		AT2G19385
		AT2G38580
		AT4G20130
		AT5G22780
		AT5G41950
		AT4G36530
		AT1G76850
		AT3G57010
		AT5G58490
		AT4G00570
		AT5G42850
		AT3G51460
		AT5G66120
		AT5G60540	PYRIDOXINE BIOSYNTHESIS 2 (PDX2)
		AT3G62700
		AT3G04650
		AT3G55620	EUKARYOTIC INITIATION FACOR 6A (eIF6A)
DPs E2FA E2FB	1	AT4G00670
DPs E2FA E2FC	1	AT2G02100
DPs E2FA RBR1	1	AT2G36010	E2FA
E2FB E2FC RBR1	6	AT5G63550
		AT5G04280
		AT2G18220
		AT5G49930
		AT5G58470
		AT1G75660
DPs E2FB E2FC	3	AT2G40630	DRC2
		AT1G04930	LIN37A
		AT4G34660
DPs E2FB RBR1	7	AT1G09020
		AT5G46580
		AT5G46630
		AT5G04130
		AT5G66420
		AT5G22220	E2FB
		AT1G01200
DPs E2FC RBR1	2	AT3G50370
		AT1G47870	E2FC
E2FA E2FB	11	AT1G33240
		AT3G54650	F BOX-LIKE17 (FBL17)
		AT4G15770
		AT4G01560
		AT1G75670
		AT3G55510
		AT1G77030
		AT2G40430
		AT3G04500
		AT5G06360
		AT4G16380
E2FA RBR1	4	AT3G56430
		AT1G01510
		AT3G07160
		AT1G04300
E2FB E2FC	3	AT1G12770
		AT3G21540
		AT1G63780
E2FB RBR1	18	AT1G48480
		AT3G48750	CDKA;1
		AT1G70940
		AT2G26280
		AT1G23870
		AT2G39670
		AT5G09880
		AT2G38700
		AT5G11210
		AT5G59750
		AT1G71220
		AT3G17970
		AT4G39220
		ATCG01020
		AT1G06890
		AT1G48900
		AT2G35500
		AT5G12370
E2FC RBR1	2	AT5G37350
		AT5G03740
DPs E2FC	1	AT5G27610	ALY1
DPs RBR1	1	AT5G14170
E2FA	10	AT2G35880
		AT3G18390
		AT3G07030
		AT2G29540
		AT2G44860
		AT5G58130
		AT3G55340
		AT3G03790
		AT1G60850
		AT2G02130
E2FB	13	AT3G26560
		AT1G54770
		AT1G43860
		AT3G09210
		AT4G16630
		AT2G36070
		AT5G57280
		AT4G05410
		AT5G20600
		AT5G40200
		AT1G36730
		AT1G79140
		AT4G27430
E2FC	4	AT2G18900
		AT3G06530
		AT2G05520
		AT2G47990
RBR1	33	AT4G35060
		AT1G79560
		AT1G23900
		AT2G31890
		AT4G21450
		AT5G53650
		AT4G16450
		AT4G14420
		AT3G56290
		AT1G12360
		AT3G19960
		AT4G16990
		AT2G23070
		AT2G15270
		AT2G36060
		AT3G04600
		AT3G57180
		AT5G64430
		AT2G15430
		AT5G06970
		AT2G43130
		AT2G27820
		AT5G66200
		AT4G39280
		AT2G25870
		AT3G02350
		AT3G21090
		AT3G28200
		AT1G73885
		AT5G42740
		AT4G21105
		ATCG00860
		AT5G05890
DPs	2	AT2G32840	LIN37B
		AT3G05380	ALY2

## Sheet: Cytoscape
This table is the basis for the cytoscape representation in figure 2 and contains proteins that are listed on sheet "edgeR P<0.05 FC>8" and that were present in at least 1/3 of the IPs of at least one bait (105 proteins).
	bait	prey	Prey UNIPROT	Prey AGI identifier	occurance	total occurence	edge score2	node type1	common1	dream1	interaction
1	E2FA	DPB	Q9FNY2	AT5G03415	35	124	1	E2FA	1	DREAM	abcrB
2	E2FA	RBR1	Q9LKZ3	AT3G12280	32	123	0.9	E2FA	1	DREAM	all
3	E2FA	DPA	Q9FNY3	AT5G02470	23	84	0.7	E2FA	1	DREAM	abcrA
5	E2FA	XI-K	F4K5J1	AT5G20490	6	45	0.2	E2FA	0	0	abcrB
6	E2FA	AT1G29320	Q0V856	AT1G29320	5	30	0.1	E2FA	0	0	abcr
7	E2FA	AT5G66470	Q8VZ74	AT5G66470	7	29	0.2	E2FA	0	0	abrB
8	E2FA	AT2G20920	Q9SKS8	AT2G20920	5	26	0.1	E2FA	0	0	abcr
9	E2FA	AT1G80750	Q0WU42	AT1G80750	5	19	0.1	E2FA	0	0	abcr
10	E2FA	RTNLB3	Q9SH59	AT1G64090	6	27	0.2	E2FA	0	0	abcr
11	E2FA	AT5G24580	A0A178UGL2	AT5G24580	5	25	0.1	E2FA	0	0	abr
12	E2FA	DHQS	Q8VYV7	AT5G66120	7	26	0.2	E2FA	0	0	abr
13	E2FA	RZ1C	Q8RWN5	AT5G04280	2	24	0.1	E2FA	0	0	abcr
14	E2FA	PTAC14	Q84JF5	AT4G20130	6	23	0.2	E2FA	0	0	abr
15	E2FA	AP4M	Q9SB50	AT4G24550	3	22	0.1	E2FA	0	0	abr
16	E2FA	MOS1	Q9SB63	AT4G24680	3	19	0.1	E2FA	0	0	abcr
17	E2FA	AT2G38580	Q682E1	AT2G38580	3	17	0.1	E2FA	0	0	abr
18	E2FA	AT4G25730	Q8VZJ4	AT4G25730	5	17	0.1	E2FA	0	0	abc
19	E2FA	AT2G24580	Q53YK5	AT2G24580	4	20	0.1	E2FA	0	0	abr
20	E2FA	PDX2	Q8LAD0	AT5G60540	6	19	0.2	E2FA	1	0	abr
21	E2FA	TMK4	Q9LK43	AT3G23750	3	19	0.1	E2FA	0	0	abr
22	E2FA	CALS9	Q9SFU6	AT3G07160	6	19	0.2	E2FA	0	0	abr
23	E2FA	ALPHAC-AD	Q8LPK4	AT5G22780	3	19	0.1	E2FA	0	0	abcr
24	E2FA	AT5G58490	Q9FGH3	AT5G58490	4	18	0.1	E2FA	0	0	abr
25	E2FA	PLP1	O23179	AT4G37070	3	19	0.1	E2FA	0	0	abr
26	E2FA	AT4G00670	O65276	AT4G00670	4	17	0.1	E2FA	0	0	abcrB
27	E2FA	GID8	Q84WK5	AT1G61150	3	18	0.1	E2FA	0	0	abr
28	E2FA	AT2G43770	O22826	AT2G43770	4	18	0.1	E2FA	0	0	abr
29	E2FA	EIF6-2	Q9M060	AT3G55620	10	46	0.3	E2FA	1	0	abcr
30	E2FA	AT3G62700	Q0WPY5	AT3G62700	4	18	0.1	E2FA	0	0	abr
31	E2FA	UXT3	Q8RXL8	AT1G06890	2	18	0.1	E2FA	0	0	abr
32	E2FA	AT2G45520	O64632	AT2G45520	3	17	0.1	E2FA	0	0	abcr
33	E2FA	NOP2A	Q9FG73	AT5G55920	6	29	0.2	E2FA	0	0	abcr
34	E2FA	AT4G39280	Q9T034	AT4G39280	2	16	0.1	E2FA	0	0	abr
35	E2FA	GYRBM	Q94BZ7	AT5G04130	1	16	0	E2FA	0	0	abrB
36	E2FA	AT5G46580	Q9LS25	AT5G46580	1	15	0	E2FA	0	0	abcrB
37	E2FA	AT4G31880	Q8GUP3	AT4G31880	9	40	0.3	E2FA	0	0	abcrA
38	E2FA	FTSH12	Q9SAJ3	AT1G79560	1	15	0	E2FA	0	0	abr
39	E2FA	AP2M	O23140	AT5G46630	2	16	0.1	E2FA	0	0	abrB
40	E2FA	SAC7	Q9C5G5	AT3G51460	3	16	0.1	E2FA	0	0	abr
41	E2FA	AT4G14420	O23298	AT4G14420	1	16	0	E2FA	0	0	abcr
42	E2FA	TPS9	Q9LRA7	AT1G23870	2	15	0.1	E2FA	0	0	abr
43	E2FA	AT5G53650	Q9FJB9	AT5G53650	1	15	0	E2FA	0	0	abr
44	E2FA	AN	O23702	AT1G01510	3	14	0.1	E2FA	0	0	abr
45	E2FA	ARO2	Q9FKW5	AT5G66200	2	15	0.1	E2FA	0	0	abr
46	E2FA	ycf2-A	P56786	ATCG00860	2	13	0.1	E2FA	0	0	abcr
47	E2FA	PATROL1	Q8RX56	AT5G06970	1	10	0	E2FA	0	0	abr
48	E2FA	AT5G14170	Q9FMT4	AT5G14170	2	13	0.1	E2FA	0	0	abrB
49	E2FA	ATTIM21L-2	Q9LXZ7	AT3G56430	3	14	0.1	E2FA	0	0	abr
50	E2FA	AT3G04650	Q9SR09	AT3G04650	3	14	0.1	E2FA	0	0	abr
51	E2FA	AT5G64430	Q9FGF3	AT5G64430	2	13	0.1	E2FA	0	0	abr
52	E2FA	AT3G56290	Q9LYL4	AT3G56290	1	12	0	E2FA	0	0	abcr
53	E2FA	AT5G04600	Q9LZ65	AT5G04600	6	26	0.2	E2FA	0	0	abcr
54	E2FA	RAP	Q8VZE7	AT2G31890	1	13	0	E2FA	0	0	abcr
55	E2FA	UGT76C5	Q9FI97	AT5G05890	2	13	0.1	E2FA	0	0	abr
56	E2FA	RIBA3	Q9FN89	AT5G59750	1	13	0	E2FA	0	0	abr
57	E2FA	AT2G43130	A0A178VPX9	AT2G43130	1	12	0	E2FA	0	0	abr
58	E2FA	PDF2.2	Q39182	AT2G02100	3	11	0.1	E2FA	0	0	all
59	E2FA	TIC100	Q8LPR8	AT5G22640	9	39	0.3	E2FA	0	0	abcrA
60	E2FA	NRPB3	Q39211	AT2G15430	1	12	0	E2FA	0	0	abr
61	E2FA	AT4G16450	O23489	AT4G16450	1	12	0	E2FA	0	0	ar
62	E2FA	AT5G50310	Q945N1	AT5G50310	6	41	0.2	E2FA	0	0	abcrB
63	E2FA	SSL8	Q9M1J7	AT3G57010	8	31	0.2	E2FA	0	0	abr
64	E2FA	AT1G73885	Q8L713	AT1G73885	1	11	0	E2FA	0	0	abr
65	E2FA	rpoC1	P56763	ATCG00180	3	30	0.1	E2FA	0	0	abcr
66	E2FA	HLB1	Q9FHY8	AT5G41950	3	21	0.1	E2FA	0	0	abr
67	E2FA	AT5G42850	Q9FMN4	AT5G42850	5	20	0.1	E2FA	0	0	abr
68	E2FA	SNF4	Q944A6	AT1G09020	2	19	0.1	E2FA	0	0	abrB
69	E2FA	GPAT4	Q9LMM0	AT1G01610	4	27	0.1	E2FA	0	0	abcr
70	E2FA	NAD-ME2	Q8L7K9	AT4G00570	6	22	0.2	E2FA	0	0	abr
71	E2FA	AT5G66420	Q94JM0	AT5G66420	2	21	0.1	E2FA	0	0	abrB
72	E2FA	GTL1	Q9C882	AT1G33240	9	18	0.3	E2FA	0	0	abcr
73	E2FA	SH3P2	Q8VWF1	AT4G34660	2	14	0.1	E2FA	0	0	abcrB
74	E2FB	DPB	Q9FNY2	AT5G03415	38	124	1	E2FB	1	DREAM	abcrB
75	E2FB	RBR1	Q9LKZ3	AT3G12280	37	123	0.9	E2FB	1	DREAM	all
76	E2FB	DPA	Q9FNY3	AT5G02470	34	84	0.9	E2FB	1	DREAM	abcrA
78	E2FB	ALY3	Q6A332	AT3G21430	22	55	0.6	E2FB	1	MuvB	bcrAB
79	E2FB	MSI1	O22467	AT5G58230	20	49	0.5	E2FB	1	MuvB	bcrAB
80	E2FB	XI-K	F4K5J1	AT5G20490	7	45	0.2	E2FB	0	0	abcrB
81	E2FB	TCX5	Q9SZD1	AT4G29000	18	43	0.5	E2FB	1	MuvB	bcrAB
82	E2FB	LIN52A	O22147	AT2G45250	18	44	0.5	E2FB	1	MuvB	bcrAB
83	E2FB	AT1G29320	Q0V856	AT1G29320	8	30	0.2	E2FB	0	0	abcr
84	E2FB	AT5G66470	Q8VZ74	AT5G66470	7	29	0.2	E2FB	0	0	abrB
85	E2FB	AT2G20920	Q9SKS8	AT2G20920	3	26	0.1	E2FB	0	0	abcr
86	E2FB	AT1G80750	Q0WU42	AT1G80750	6	19	0.2	E2FB	0	0	abcr
87	E2FB	RTNLB3	Q9SH59	AT1G64090	7	27	0.2	E2FB	0	0	abcr
88	E2FB	AT5G24580	A0A178UGL2	AT5G24580	10	25	0.3	E2FB	0	0	abr
89	E2FB	DHQS	Q8VYV7	AT5G66120	8	26	0.2	E2FB	0	0	abr
90	E2FB	RZ1C	Q8RWN5	AT5G04280	5	24	0.1	E2FB	0	0	abcr
91	E2FB	PTAC14	Q84JF5	AT4G20130	6	23	0.2	E2FB	0	0	abr
92	E2FB	AP4M	Q9SB50	AT4G24550	6	22	0.2	E2FB	0	0	abr
93	E2FB	MOS1	Q9SB63	AT4G24680	4	19	0.1	E2FB	0	0	abcr
94	E2FB	AT2G38580	Q682E1	AT2G38580	3	17	0.1	E2FB	0	0	abr
95	E2FB	AT4G25730	Q8VZJ4	AT4G25730	7	17	0.2	E2FB	0	0	abc
96	E2FB	XRN3	Q9FQ03	AT1G75660	3	19	0.1	E2FB	0	0	bcrB
97	E2FB	AT2G24580	Q53YK5	AT2G24580	5	20	0.1	E2FB	0	0	abr
98	E2FB	PDX2	Q8LAD0	AT5G60540	3	19	0.1	E2FB	1	0	abr
99	E2FB	TMK4	Q9LK43	AT3G23750	4	19	0.1	E2FB	0	0	abr
100	E2FB	CALS9	Q9SFU6	AT3G07160	2	19	0.1	E2FB	0	0	abr
101	E2FB	ALPHAC-AD	Q8LPK4	AT5G22780	6	19	0.2	E2FB	0	0	abcr
102	E2FB	AT5G58490	Q9FGH3	AT5G58490	3	18	0.1	E2FB	0	0	abr
103	E2FB	PLP1	O23179	AT4G37070	3	19	0.1	E2FB	0	0	abr
104	E2FB	AT4G00670	O65276	AT4G00670	8	17	0.2	E2FB	0	0	abcrB
105	E2FB	GID8	Q84WK5	AT1G61150	4	18	0.1	E2FB	0	0	abr
106	E2FB	AT2G43770	O22826	AT2G43770	5	18	0.1	E2FB	0	0	abr
107	E2FB	EIF6-2	Q9M060	AT3G55620	15	46	0.4	E2FB	1	0	abcr
108	E2FB	AT3G50370	Q9SND1	AT3G50370	2	15	0.1	E2FB	0	0	bcrB
109	E2FB	AT3G62700	Q0WPY5	AT3G62700	3	18	0.1	E2FB	0	0	abr
110	E2FB	RABA3	A0A178WMT9	AT1G01200	5	16	0.1	E2FB	0	0	bcrB
111	E2FB	UXT3	Q8RXL8	AT1G06890	3	18	0.1	E2FB	0	0	abr
112	E2FB	AT2G45520	O64632	AT2G45520	3	17	0.1	E2FB	0	0	abcr
113	E2FB	NOP2A	Q9FG73	AT5G55920	5	29	0.1	E2FB	0	0	abcr
114	E2FB	CDKA-1	P24100	AT3G48750	5	16	0.1	E2FB	1	0	br
115	E2FB	AT4G39280	Q9T034	AT4G39280	2	16	0.1	E2FB	0	0	abr
116	E2FB	GYRBM	Q94BZ7	AT5G04130	4	16	0.1	E2FB	0	0	abrB
117	E2FB	AT5G46580	Q9LS25	AT5G46580	4	15	0.1	E2FB	0	0	abcrB
118	E2FB	AT4G31880	Q8GUP3	AT4G31880	10	40	0.3	E2FB	0	0	abcrA
119	E2FB	FTSH12	Q9SAJ3	AT1G79560	2	15	0.1	E2FB	0	0	abr
120	E2FB	AP2M	O23140	AT5G46630	3	16	0.1	E2FB	0	0	abrB
121	E2FB	SAC7	Q9C5G5	AT3G51460	3	16	0.1	E2FB	0	0	abr
122	E2FB	AT4G14420	O23298	AT4G14420	2	16	0.1	E2FB	0	0	abcr
123	E2FB	TPS9	Q9LRA7	AT1G23870	4	15	0.1	E2FB	0	0	abr
124	E2FB	AT5G53650	Q9FJB9	AT5G53650	1	15	0	E2FB	0	0	abr
125	E2FB	AN	O23702	AT1G01510	2	14	0.1	E2FB	0	0	abr
126	E2FB	ARO2	Q9FKW5	AT5G66200	2	15	0.1	E2FB	0	0	abr
127	E2FB	ycf2-A	P56786	ATCG00860	2	13	0.1	E2FB	0	0	abcr
128	E2FB	AT3G04600	Q9SR15	AT3G04600	2	13	0.1	E2FB	0	0	br
129	E2FB	PATROL1	Q8RX56	AT5G06970	1	10	0	E2FB	0	0	abr
130	E2FB	AT5G14170	Q9FMT4	AT5G14170	1	13	0	E2FB	0	0	abrB
131	E2FB	ATTIM21L-2	Q9LXZ7	AT3G56430	1	14	0	E2FB	0	0	abr
132	E2FB	AT3G04650	Q9SR09	AT3G04650	3	14	0.1	E2FB	0	0	abr
133	E2FB	RER1A	O48670	AT4G39220	3	14	0.1	E2FB	0	0	br
134	E2FB	AT5G64430	Q9FGF3	AT5G64430	1	13	0	E2FB	0	0	abr
135	E2FB	AT3G56290	Q9LYL4	AT3G56290	2	12	0.1	E2FB	0	0	abcr
136	E2FB	AT5G04600	Q9LZ65	AT5G04600	7	26	0.2	E2FB	0	0	abcr
137	E2FB	UGGT	Q0WL80	AT1G71220	4	13	0.1	E2FB	0	0	br
138	E2FB	RAP	Q8VZE7	AT2G31890	2	13	0.1	E2FB	0	0	abcr
139	E2FB	UGT76C5	Q9FI97	AT5G05890	2	13	0.1	E2FB	0	0	abr
140	E2FB	RKL1	Q9LP77	AT1G48480	5	13	0.1	E2FB	0	0	br
141	E2FB	RIBA3	Q9FN89	AT5G59750	3	13	0.1	E2FB	0	0	abr
142	E2FB	AT2G43130	A0A178VPX9	AT2G43130	2	12	0.1	E2FB	0	0	abr
143	E2FB	PDF2.2	Q39182	AT2G02100	2	11	0.1	E2FB	0	0	all
144	E2FB	TIC100	Q8LPR8	AT5G22640	10	39	0.3	E2FB	0	0	abcrA
145	E2FB	LIN37A	Q8L4Z1	AT1G04930	5	11	0.1	E2FB	1	MuvB	bcrB
146	E2FB	SEC10a	X5JA13	AT5G12370	3	12	0.1	E2FB	0	0	br
147	E2FB	UEV1C	Q9SJ44	AT2G36060	1	12	0	E2FB	0	0	br
148	E2FB	NRPB3	Q39211	AT2G15430	2	12	0.1	E2FB	0	0	abr
149	E2FB	HIPP25	O49613	AT4G35060	1	12	0	E2FB	0	0	br
150	E2FB	GAUT9	Q9FWA4	AT3G02350	1	12	0	E2FB	0	0	bcr
151	E2FB	AT5G50310	Q945N1	AT5G50310	12	41	0.3	E2FB	0	0	abcrB
152	E2FB	SSL8	Q9M1J7	AT3G57010	9	31	0.2	E2FB	0	0	abr
153	E2FB	PER31	Q9LHA7	AT3G28200	2	11	0.1	E2FB	0	0	bcr
154	E2FB	ALY1	Q6A331	AT5G27610	1	8	0	E2FB	1	MuvB	bcrB
155	E2FB	AT1G73885	Q8L713	AT1G73885	1	11	0	E2FB	0	0	abr
156	E2FB	CKA4	O64816	AT2G23070	2	11	0.1	E2FB	0	0	br
157	E2FB	YBEY	Q8L5Z4	AT2G25870	1	11	0	E2FB	0	0	br
158	E2FB	BPG2	Q8W4I6	AT3G57180	2	11	0.1	E2FB	0	0	br
159	E2FB	rpoC1	P56763	ATCG00180	9	30	0.2	E2FB	0	0	abcr
160	E2FB	DRC2	Q94EI6	AT2G40630	4	9	0.1	E2FB	1	MuvB	bcB
161	E2FB	ADT3	Q9ZUY3	AT2G27820	1	10	0	E2FB	0	0	br
162	E2FB	HLB1	Q9FHY8	AT5G41950	5	21	0.1	E2FB	0	0	abr
163	E2FB	AT5G42850	Q9FMN4	AT5G42850	5	20	0.1	E2FB	0	0	abr
164	E2FB	SNF4	Q944A6	AT1G09020	5	19	0.1	E2FB	0	0	abrB
165	E2FB	GPAT4	Q9LMM0	AT1G01610	7	27	0.2	E2FB	0	0	abcr
166	E2FB	OEP64	Q9LVH5	AT3G17970	5	18	0.1	E2FB	0	0	bcr
167	E2FB	NAD-ME2	Q8L7K9	AT4G00570	10	22	0.3	E2FB	0	0	abr
168	E2FB	AT5G66420	Q94JM0	AT5G66420	7	21	0.2	E2FB	0	0	abrB
169	E2FB	GTL1	Q9C882	AT1G33240	5	18	0.1	E2FB	0	0	abcr
170	E2FB	SH3P2	Q8VWF1	AT4G34660	5	14	0.1	E2FB	0	0	abcrB
171	E2FB	ALY2	Q6A333	AT3G05380	2	4	0.1	E2FB	1	MuvB	bcB
172	E2FB	MVD1	O23722	AT2G38700	4	15	0.1	E2FB	0	0	br
173	E2FC	DPB	Q9FNY2	AT5G03415	20	124	1	E2FC	1	DREAM	abcrB
174	E2FC	RBR1	Q9LKZ3	AT3G12280	16	123	0.8	E2FC	1	DREAM	all
175	E2FC	DPA	Q9FNY3	AT5G02470	11	84	0.6	E2FC	1	DREAM	abcrA
177	E2FC	ALY3	Q6A332	AT3G21430	7	55	0.4	E2FC	1	MuvB	bcrAB
178	E2FC	MSI1	O22467	AT5G58230	8	49	0.4	E2FC	1	MuvB	bcrAB
179	E2FC	XI-K	F4K5J1	AT5G20490	11	45	0.6	E2FC	0	0	abcrB
180	E2FC	TCX5	Q9SZD1	AT4G29000	6	43	0.3	E2FC	1	MuvB	bcrAB
181	E2FC	LIN52A	O22147	AT2G45250	6	44	0.3	E2FC	1	MuvB	bcrAB
182	E2FC	AT1G29320	Q0V856	AT1G29320	3	30	0.2	E2FC	0	0	abcr
183	E2FC	AT2G20920	Q9SKS8	AT2G20920	2	26	0.1	E2FC	0	0	abcr
184	E2FC	AT1G80750	Q0WU42	AT1G80750	6	19	0.3	E2FC	0	0	abcr
185	E2FC	RTNLB3	Q9SH59	AT1G64090	1	27	0.1	E2FC	0	0	abcr
186	E2FC	RZ1C	Q8RWN5	AT5G04280	4	24	0.2	E2FC	0	0	abcr
187	E2FC	MOS1	Q9SB63	AT4G24680	7	19	0.4	E2FC	0	0	abcr
188	E2FC	AT4G25730	Q8VZJ4	AT4G25730	5	17	0.3	E2FC	0	0	abc
189	E2FC	XRN3	Q9FQ03	AT1G75660	5	19	0.3	E2FC	0	0	bcrB
190	E2FC	ALPHAC-AD	Q8LPK4	AT5G22780	1	19	0.1	E2FC	0	0	abcr
191	E2FC	AT4G00670	O65276	AT4G00670	1	17	0.1	E2FC	0	0	abcrB
192	E2FC	EIF6-2	Q9M060	AT3G55620	2	46	0.1	E2FC	1	0	abcr
193	E2FC	AT3G50370	Q9SND1	AT3G50370	6	15	0.3	E2FC	0	0	bcrB
194	E2FC	RABA3	A0A178WMT9	AT1G01200	1	16	0.1	E2FC	0	0	bcrB
195	E2FC	AT2G45520	O64632	AT2G45520	3	17	0.2	E2FC	0	0	abcr
196	E2FC	NOP2A	Q9FG73	AT5G55920	3	29	0.2	E2FC	0	0	abcr
197	E2FC	AT5G46580	Q9LS25	AT5G46580	1	15	0.1	E2FC	0	0	abcrB
198	E2FC	AT4G31880	Q8GUP3	AT4G31880	6	40	0.3	E2FC	0	0	abcrA
199	E2FC	AT4G14420	O23298	AT4G14420	2	16	0.1	E2FC	0	0	abcr
200	E2FC	ycf2-A	P56786	ATCG00860	1	13	0.1	E2FC	0	0	abcr
201	E2FC	AT3G56290	Q9LYL4	AT3G56290	1	12	0.1	E2FC	0	0	abcr
202	E2FC	AT5G04600	Q9LZ65	AT5G04600	6	26	0.3	E2FC	0	0	abcr
203	E2FC	RAP	Q8VZE7	AT2G31890	1	13	0.1	E2FC	0	0	abcr
204	E2FC	PDF2.2	Q39182	AT2G02100	3	11	0.2	E2FC	0	0	all
205	E2FC	TIC100	Q8LPR8	AT5G22640	1	39	0.1	E2FC	0	0	abcrA
206	E2FC	LIN37A	Q8L4Z1	AT1G04930	3	11	0.2	E2FC	1	MuvB	bcrB
207	E2FC	GAUT9	Q9FWA4	AT3G02350	1	12	0.1	E2FC	0	0	bcr
208	E2FC	AT5G50310	Q945N1	AT5G50310	5	41	0.3	E2FC	0	0	abcrB
209	E2FC	PER31	Q9LHA7	AT3G28200	1	11	0.1	E2FC	0	0	bcr
210	E2FC	ALY1	Q6A331	AT5G27610	4	8	0.2	E2FC	1	MuvB	bcrB
211	E2FC	rpoC1	P56763	ATCG00180	5	30	0.3	E2FC	0	0	abcr
212	E2FC	DRC2	Q94EI6	AT2G40630	4	9	0.2	E2FC	1	MuvB	bcB
213	E2FC	GPAT4	Q9LMM0	AT1G01610	3	27	0.2	E2FC	0	0	abcr
214	E2FC	OEP64	Q9LVH5	AT3G17970	2	18	0.1	E2FC	0	0	bcr
215	E2FC	GTL1	Q9C882	AT1G33240	1	18	0.1	E2FC	0	0	abcr
216	E2FC	SH3P2	Q8VWF1	AT4G34660	3	14	0.2	E2FC	0	0	abcrB
217	E2FC	LIN37B	O50068	AT2G32840	2	5	0.1	E2FC	1	MuvB	cB
218	E2FC	ALY2	Q6A333	AT3G05380	1	4	0.1	E2FC	1	MuvB	bcB
219	RBR1	DPB	Q9FNY2	AT5G03415	28	124	0.9	RBR1	1	DREAM	abcrB
221	RBR1	DPA	Q9FNY3	AT5G02470	13	84	0.4	RBR1	1	DREAM	abcrA
222	RBR1	E2FB	Q9FV71	AT5G22220	28	73	0.9	RBR1	1	DREAM	brAB
223	RBR1	E2FA	Q9FNY0	AT2G36010	22	63	0.7	RBR1	1	DREAM	arAB
224	RBR1	E2FC	Q9FV70	AT1G47870	27	53	0.8	RBR1	1	DREAM	crAB
225	RBR1	ALY3	Q6A332	AT3G21430	20	55	0.6	RBR1	1	MuvB	bcrAB
226	RBR1	MSI1	O22467	AT5G58230	15	49	0.5	RBR1	1	MuvB	bcrAB
227	RBR1	XI-K	F4K5J1	AT5G20490	18	45	0.6	RBR1	0	0	abcrB
228	RBR1	TCX5	Q9SZD1	AT4G29000	14	43	0.4	RBR1	1	MuvB	bcrAB
229	RBR1	LIN52A	O22147	AT2G45250	14	44	0.4	RBR1	1	MuvB	bcrAB
230	RBR1	AT1G29320	Q0V856	AT1G29320	14	30	0.4	RBR1	0	0	abcr
231	RBR1	AT5G66470	Q8VZ74	AT5G66470	14	29	0.4	RBR1	0	0	abrB
232	RBR1	AT2G20920	Q9SKS8	AT2G20920	16	26	0.5	RBR1	0	0	abcr
233	RBR1	AT1G80750	Q0WU42	AT1G80750	2	19	0.1	RBR1	0	0	abcr
234	RBR1	RTNLB3	Q9SH59	AT1G64090	13	27	0.4	RBR1	0	0	abcr
235	RBR1	AT5G24580	A0A178UGL2	AT5G24580	10	25	0.3	RBR1	0	0	abr
236	RBR1	DHQS	Q8VYV7	AT5G66120	11	26	0.3	RBR1	0	0	abr
237	RBR1	RZ1C	Q8RWN5	AT5G04280	13	24	0.4	RBR1	0	0	abcr
238	RBR1	PTAC14	Q84JF5	AT4G20130	11	23	0.3	RBR1	0	0	abr
239	RBR1	AP4M	Q9SB50	AT4G24550	13	22	0.4	RBR1	0	0	abr
240	RBR1	MOS1	Q9SB63	AT4G24680	5	19	0.2	RBR1	0	0	abcr
241	RBR1	AT2G38580	Q682E1	AT2G38580	11	17	0.3	RBR1	0	0	abr
242	RBR1	XRN3	Q9FQ03	AT1G75660	11	19	0.3	RBR1	0	0	bcrB
243	RBR1	AT2G24580	Q53YK5	AT2G24580	11	20	0.3	RBR1	0	0	abr
244	RBR1	PDX2	Q8LAD0	AT5G60540	10	19	0.3	RBR1	1	0	abr
245	RBR1	TMK4	Q9LK43	AT3G23750	12	19	0.4	RBR1	0	0	abr
246	RBR1	CALS9	Q9SFU6	AT3G07160	11	19	0.3	RBR1	0	0	abr
247	RBR1	ALPHAC-AD	Q8LPK4	AT5G22780	9	19	0.3	RBR1	0	0	abcr
248	RBR1	AT5G58490	Q9FGH3	AT5G58490	11	18	0.3	RBR1	0	0	abr
249	RBR1	PLP1	O23179	AT4G37070	13	19	0.4	RBR1	0	0	abr
250	RBR1	AT4G00670	O65276	AT4G00670	2	17	0.1	RBR1	0	0	abcrB
251	RBR1	GID8	Q84WK5	AT1G61150	11	18	0.3	RBR1	0	0	abr
252	RBR1	AT2G43770	O22826	AT2G43770	9	18	0.3	RBR1	0	0	abr
253	RBR1	EIF6-2	Q9M060	AT3G55620	15	46	0.5	RBR1	1	0	abcr
254	RBR1	AT3G50370	Q9SND1	AT3G50370	6	15	0.2	RBR1	0	0	bcrB
255	RBR1	AT3G62700	Q0WPY5	AT3G62700	11	18	0.3	RBR1	0	0	abr
256	RBR1	RABA3	A0A178WMT9	AT1G01200	9	16	0.3	RBR1	0	0	bcrB
257	RBR1	UXT3	Q8RXL8	AT1G06890	13	18	0.4	RBR1	0	0	abr
258	RBR1	AT2G45520	O64632	AT2G45520	8	17	0.3	RBR1	0	0	abcr
259	RBR1	NOP2A	Q9FG73	AT5G55920	14	29	0.4	RBR1	0	0	abcr
260	RBR1	CDKA-1	P24100	AT3G48750	11	16	0.3	RBR1	1	0	br
261	RBR1	AT4G39280	Q9T034	AT4G39280	12	16	0.4	RBR1	0	0	abr
262	RBR1	GYRBM	Q94BZ7	AT5G04130	10	16	0.3	RBR1	0	0	abrB
263	RBR1	AT5G46580	Q9LS25	AT5G46580	7	15	0.2	RBR1	0	0	abcrB
264	RBR1	AT4G31880	Q8GUP3	AT4G31880	11	40	0.3	RBR1	0	0	abcrA
265	RBR1	FTSH12	Q9SAJ3	AT1G79560	12	15	0.4	RBR1	0	0	abr
266	RBR1	AP2M	O23140	AT5G46630	9	16	0.3	RBR1	0	0	abrB
267	RBR1	SAC7	Q9C5G5	AT3G51460	10	16	0.3	RBR1	0	0	abr
268	RBR1	AT4G14420	O23298	AT4G14420	11	16	0.3	RBR1	0	0	abcr
269	RBR1	TPS9	Q9LRA7	AT1G23870	9	15	0.3	RBR1	0	0	abr
270	RBR1	AT5G53650	Q9FJB9	AT5G53650	13	15	0.4	RBR1	0	0	abr
271	RBR1	AN	O23702	AT1G01510	9	14	0.3	RBR1	0	0	abr
272	RBR1	ARO2	Q9FKW5	AT5G66200	11	15	0.3	RBR1	0	0	abr
273	RBR1	ycf2-A	P56786	ATCG00860	8	13	0.3	RBR1	0	0	abcr
274	RBR1	AT3G04600	Q9SR15	AT3G04600	11	13	0.3	RBR1	0	0	br
275	RBR1	PATROL1	Q8RX56	AT5G06970	8	10	0.3	RBR1	0	0	abr
276	RBR1	AT5G14170	Q9FMT4	AT5G14170	9	13	0.3	RBR1	0	0	abrB
277	RBR1	ATTIM21L-2	Q9LXZ7	AT3G56430	10	14	0.3	RBR1	0	0	abr
278	RBR1	AT3G04650	Q9SR09	AT3G04650	8	14	0.3	RBR1	0	0	abr
279	RBR1	RER1A	O48670	AT4G39220	11	14	0.3	RBR1	0	0	br
280	RBR1	AT5G64430	Q9FGF3	AT5G64430	10	13	0.3	RBR1	0	0	abr
281	RBR1	AT3G56290	Q9LYL4	AT3G56290	8	12	0.3	RBR1	0	0	abcr
282	RBR1	AT5G04600	Q9LZ65	AT5G04600	5	26	0.2	RBR1	0	0	abcr
283	RBR1	UGGT	Q0WL80	AT1G71220	9	13	0.3	RBR1	0	0	br
284	RBR1	RAP	Q8VZE7	AT2G31890	9	13	0.3	RBR1	0	0	abcr
285	RBR1	UGT76C5	Q9FI97	AT5G05890	9	13	0.3	RBR1	0	0	abr
286	RBR1	RKL1	Q9LP77	AT1G48480	8	13	0.3	RBR1	0	0	br
287	RBR1	RIBA3	Q9FN89	AT5G59750	9	13	0.3	RBR1	0	0	abr
288	RBR1	AT2G43130	A0A178VPX9	AT2G43130	9	12	0.3	RBR1	0	0	abr
289	RBR1	PDF2.2	Q39182	AT2G02100	1	11	0	RBR1	0	0	all
290	RBR1	TIC100	Q8LPR8	AT5G22640	15	39	0.5	RBR1	0	0	abcrA
291	RBR1	LIN37A	Q8L4Z1	AT1G04930	1	11	0	RBR1	1	MuvB	bcrB
292	RBR1	SEC10a	X5JA13	AT5G12370	9	12	0.3	RBR1	0	0	br
293	RBR1	UEV1C	Q9SJ44	AT2G36060	11	12	0.3	RBR1	0	0	br
294	RBR1	NRPB3	Q39211	AT2G15430	9	12	0.3	RBR1	0	0	abr
295	RBR1	AT4G16450	O23489	AT4G16450	11	12	0.3	RBR1	0	0	ar
296	RBR1	HIPP25	O49613	AT4G35060	11	12	0.3	RBR1	0	0	br
297	RBR1	GAUT9	Q9FWA4	AT3G02350	10	12	0.3	RBR1	0	0	bcr
298	RBR1	AT5G50310	Q945N1	AT5G50310	15	41	0.5	RBR1	0	0	abcrB
299	RBR1	AT4G21105	Q8LCZ9	AT4G21105	11	11	0.3	RBR1	0	0	r
300	RBR1	SSL8	Q9M1J7	AT3G57010	12	31	0.4	RBR1	0	0	abr
301	RBR1	PER31	Q9LHA7	AT3G28200	8	11	0.3	RBR1	0	0	bcr
302	RBR1	ALY1	Q6A331	AT5G27610	2	8	0.1	RBR1	1	MuvB	bcrB
303	RBR1	AT1G73885	Q8L713	AT1G73885	9	11	0.3	RBR1	0	0	abr
304	RBR1	CKA4	O64816	AT2G23070	9	11	0.3	RBR1	0	0	br
305	RBR1	YBEY	Q8L5Z4	AT2G25870	10	11	0.3	RBR1	0	0	br
306	RBR1	BPG2	Q8W4I6	AT3G57180	9	11	0.3	RBR1	0	0	br
307	RBR1	rpoC1	P56763	ATCG00180	11	30	0.3	RBR1	0	0	abcr
308	RBR1	ADT3	Q9ZUY3	AT2G27820	9	10	0.3	RBR1	0	0	br
309	RBR1	HLB1	Q9FHY8	AT5G41950	12	21	0.4	RBR1	0	0	abr
310	RBR1	GAMMA-ADR	Q84K16	AT1G23900	9	9	0.3	RBR1	0	0	r
311	RBR1	AT5G42850	Q9FMN4	AT5G42850	9	20	0.3	RBR1	0	0	abr
312	RBR1	SNF4	Q944A6	AT1G09020	10	19	0.3	RBR1	0	0	abrB
313	RBR1	GPAT4	Q9LMM0	AT1G01610	11	27	0.3	RBR1	0	0	abcr
314	RBR1	OEP64	Q9LVH5	AT3G17970	10	18	0.3	RBR1	0	0	bcr
315	RBR1	NAD-ME2	Q8L7K9	AT4G00570	5	22	0.2	RBR1	0	0	abr
316	RBR1	AT5G66420	Q94JM0	AT5G66420	10	21	0.3	RBR1	0	0	abrB
317	RBR1	GTL1	Q9C882	AT1G33240	2	18	0.1	RBR1	0	0	abcr
318	RBR1	SH3P2	Q8VWF1	AT4G34660	2	14	0.1	RBR1	0	0	abcrB
319	RBR1	MVD1	O23722	AT2G38700	10	15	0.3	RBR1	0	0	br
320	DPA	RBR1	Q9LKZ3	AT3G12280	3	123	1	DPA	1	DREAM	all
322	DPA	E2FB	Q9FV71	AT5G22220	3	73	1	DPA	1	DREAM	brAB
323	DPA	E2FA	Q9FNY0	AT2G36010	3	63	1	DPA	1	DREAM	arAB
324	DPA	E2FC	Q9FV70	AT1G47870	3	53	1	DPA	1	DREAM	crAB
325	DPA	ALY3	Q6A332	AT3G21430	3	55	1	DPA	1	MuvB	bcrAB
326	DPA	MSI1	O22467	AT5G58230	3	49	1	DPA	1	MuvB	bcrAB
327	DPA	TCX5	Q9SZD1	AT4G29000	3	43	1	DPA	1	MuvB	bcrAB
328	DPA	LIN52A	O22147	AT2G45250	3	44	1	DPA	1	MuvB	bcrAB
329	DPA	AT4G31880	Q8GUP3	AT4G31880	1	40	0.3	DPA	0	0	abcrA
330	DPA	PDF2.2	Q39182	AT2G02100	1	11	0.3	DPA	0	0	all
331	DPA	TIC100	Q8LPR8	AT5G22640	1	39	0.3	DPA	0	0	abcrA
333	DPB	RBR1	Q9LKZ3	AT3G12280	3	123	1	DPB	1	DREAM	all
334	DPB	E2FB	Q9FV71	AT5G22220	3	73	1	DPB	1	DREAM	brAB
335	DPB	E2FA	Q9FNY0	AT2G36010	3	63	1	DPB	1	DREAM	arAB
336	DPB	E2FC	Q9FV70	AT1G47870	3	53	1	DPB	1	DREAM	crAB
337	DPB	ALY3	Q6A332	AT3G21430	3	55	1	DPB	1	MuvB	bcrAB
338	DPB	MSI1	O22467	AT5G58230	3	49	1	DPB	1	MuvB	bcrAB
339	DPB	XI-K	F4K5J1	AT5G20490	3	45	1	DPB	0	0	abcrB
340	DPB	TCX5	Q9SZD1	AT4G29000	2	43	0.7	DPB	1	MuvB	bcrAB
341	DPB	LIN52A	O22147	AT2G45250	3	44	1	DPB	1	MuvB	bcrAB
342	DPB	AT5G66470	Q8VZ74	AT5G66470	1	29	0.3	DPB	0	0	abrB
343	DPB	AT4G00670	O65276	AT4G00670	2	17	0.7	DPB	0	0	abcrB
344	DPB	AT3G50370	Q9SND1	AT3G50370	1	15	0.3	DPB	0	0	bcrB
345	DPB	RABA3	A0A178WMT9	AT1G01200	1	16	0.3	DPB	0	0	bcrB
346	DPB	GYRBM	Q94BZ7	AT5G04130	1	16	0.3	DPB	0	0	abrB
347	DPB	AT5G46580	Q9LS25	AT5G46580	2	15	0.7	DPB	0	0	abcrB
348	DPB	AP2M	O23140	AT5G46630	2	16	0.7	DPB	0	0	abrB
349	DPB	AT5G14170	Q9FMT4	AT5G14170	1	13	0.3	DPB	0	0	abrB
350	DPB	PDF2.2	Q39182	AT2G02100	1	11	0.3	DPB	0	0	all
351	DPB	LIN37A	Q8L4Z1	AT1G04930	2	11	0.7	DPB	1	MuvB	bcrB
352	DPB	AT5G50310	Q945N1	AT5G50310	1	41	0.3	DPB	0	0	abcrB
353	DPB	ALY1	Q6A331	AT5G27610	1	8	0.3	DPB	1	MuvB	bcrB
354	DPB	DRC2	Q94EI6	AT2G40630	1	9	0.3	DPB	1	MuvB	bcB
355	DPB	SNF4	Q944A6	AT1G09020	1	19	0.3	DPB	0	0	abrB
356	DPB	AT5G66420	Q94JM0	AT5G66420	1	21	0.3	DPB	0	0	abrB
357	DPB	SH3P2	Q8VWF1	AT4G34660	1	14	0.3	DPB	0	0	abcrB
358	DPB	LIN37B	O50068	AT2G32840	3	5	1	DPB	1	MuvB	cB
359	DPB	ALY2	Q6A333	AT3G05380	1	4	0.3	DPB	1	MuvB	bcB
